# Supplementary material
Source: publisher figshare collection journal article supplement (https://rs.figshare.com/ndownloader/files/9697033)
Supplement: Supplementary file 1 [file 9697033]

## Sheet: Elite Rankings
Loffing, F.: Left-handedness and time pressure in elite interactive ball games @ Biology Letters
Year-end rankings in badminton, squash, table tennis, tennis (men & women) and baseball and cricket (men only)
	Rankings - Complete										Different players listed in rankings						Summary statistic on year-end rankings and left-hander frequency
	sex	sport	year	date	rank	player	nation	team	hand		sex	sport	player	hand	alternative name			sport	2009		2010		2011		2012		2013		2014
	female	badminton	2009	2009-12-31	1	WANG Yihan	CHN	---	R		female	badminton	Aditi MUTATKAR	R					N	% LH	N	% LH	N	% LH	N	% LH	N	% LH	N	% LH
	female	badminton	2009	2009-12-31	2	WANG Lin	CHN	---	R		female	badminton	Adrianti FIRDASARI	R			male	badminton	99	16.1616	100	17	100	16	100	15	100	11	100	13
	female	badminton	2009	2009-12-31	3	Tine BAUN	DEN	---	R		female	badminton	Agnese ALLEGRINI	R				squash	100	11	100	10	100	11	100	10	100	9	100	11
	female	badminton	2009	2009-12-31	4	PI Hongyan	FRA	---	R		female	badminton	Ai GOTO	R				table tennis	100	27	100	27	100	31	100	26	100	30	100	22
	female	badminton	2009	2009-12-31	5	ZHOU Mi	HKG	---	R		female	badminton	Aiying XING	R				tennis	100	13	100	13	100	16	100	14	100	15	100	15
	female	badminton	2009	2009-12-31	6	JIANG Yanjiao	CHN	---	L		female	badminton	Akane YAMAGUCHI	R				cricket (bowler)	100	26	100	24	100	24	100	26	100	23	100	21
	female	badminton	2009	2009-12-31	7	LU Lan	CHN	---	R		female	badminton	Akvile STAPUSAITYTE	R				baseball (pitcher)	78	32.0513	92	30.4348	94	25.5319	88	34.0909	81	29.6296	88	25
	female	badminton	2009	2009-12-31	8	Saina NEHWAL	IND	---	R		female	badminton	Alesia ZAITSAVA	R			female	badminton	100	6	100	7	100	8	100	9	100	8	100	9
	female	badminton	2009	2009-12-31	9	Juliane SCHENK	GER	---	R		female	badminton	Ana ROVITA	R				squash	95	7.36842	98	7.14286	96	10.4167	99	10.101	98	12.2449	98	10.2041
	female	badminton	2009	2009-12-31	10	WANG Xin	CHN	---	L		female	badminton	Anastasia PROKOPENKO	R				table tennis	100	18	99	19.1919	100	20	100	24	100	21	100	23
	female	badminton	2009	2009-12-31	11	WANG Chen	HKG	---	R		female	badminton	Anita Raj KAUR	R				tennis	100	8	100	10	100	8	100	10	100	7	100	6
	female	badminton	2009	2009-12-31	12	WANG Shixian	CHN	---	R		female	badminton	Anna NAREL	R
	female	badminton	2009	2009-12-31	13	YAO Jie	NED	---	R		female	badminton	Anna RANKIN	R
	female	badminton	2009	2009-12-31	14	Salakjit PONSANA	THA	---	R		female	badminton	Anna RICE	R
	female	badminton	2009	2009-12-31	15	Petya NEDELCHEVA	BUL	---	R		female	badminton	Anna Thea MADSEN	R
	female	badminton	2009	2009-12-31	16	Adrianti FIRDASARI	INA	---	R		female	badminton	Anne HALD JENSEN	R
	female	badminton	2009	2009-12-31	17	YIP Pui Yin	HKG	---	R		female	badminton	Anu NIEMINEN	R
	female	badminton	2009	2009-12-31	18	XIE Xingfang	CHN	---	R		female	badminton	Aprillia YUSWANDARI	R			Summary statistic on different players
	female	badminton	2009	2009-12-31	19	HWANG Hye Youn	KOR	---	R		female	badminton	Arundhati PANTAWANE	R					N	L	R	N/A	% LH	Rankings obtained from...
	female	badminton	2009	2009-12-31	20	Mew Choo WONG	MAS	---	R		female	badminton	Aya OHORI	L			male	badminton	183	23	159	1	12.6374	www.bwfbadminton.org
	female	badminton	2009	2009-12-31	21	Beiwen ZHANG	USA	---	R		female	badminton	Ayane KURIHARA	R				squash	161	14	147	0	8.69565	www.squashinfo.com
	female	badminton	2009	2009-12-31	22	Ella DIEHL	RUS	---	R		female	badminton	Ayumi MINE	R				table tennis	182	47	135	0	25.8242	www.ittf.com
	female	badminton	2009	2009-12-31	23	Sayaka SATO	JPN	---	L		female	badminton	BAE Seung Hee	R				tennis	194	27	167	0	13.9175	www.atpworldtour.com
	female	badminton	2009	2009-12-31	24	BAE Seung Hee	KOR	---	R		female	badminton	BAE Yeon Ju	L				cricket (bowler)	202	44	158	0	21.7822	www.relianceiccrankings.com
	female	badminton	2009	2009-12-31	25	Judith MEULENDIJKS	NED	---	R		female	badminton	Beatriz CORRALES	R				baseball (pitcher)	204	62	142	0	30.3922	www.espn.go.com/mlb/stats
	female	badminton	2009	2009-12-31	26	Ai GOTO	JPN	---	R		female	badminton	Beiwen ZHANG	R			female	badminton	216	17	199	0	7.87037	www.bwfbadminton.org
	female	badminton	2009	2009-12-31	27	Maria Febe KUSUMASTUTI	INA	---	R		female	badminton	Bellaetrix MANUPUTTY	R				squash	178	14	153	11	8.38323	www.squashinfo.com
	female	badminton	2009	2009-12-31	28	Eriko HIROSE	JPN	---	R		female	badminton	Busanan ONGBUMRUNGPHAN	R				table tennis	188	36	151	1	19.2513	www.ittf.com
	female	badminton	2009	2009-12-31	29	KIM Moon Hi	KOR	---	R		female	badminton	Camilla SORENSEN	R				tennis	196	15	181	0	7.65306	www.wtatennis.com
	female	badminton	2009	2009-12-31	30	ZHU Lin	CHN	---	R		female	badminton	Carissa TURNER	R
	female	badminton	2009	2009-12-31	31	Lyddia Yi Yu CHEAH	MAS	---	R		female	badminton	Carola BOTT	R
	female	badminton	2009	2009-12-31	32	Susan EGELSTAFF	SCO	---	R		female	badminton	Carolina MARIN	L
	female	badminton	2009	2009-12-31	33	Megumi TARUNO	JPN	---	L		female	badminton	Cee Nantana KETPURA	R
	female	badminton	2009	2009-12-31	34	Larisa GRIGA	UKR	---	R		female	badminton	CHAN Hung Yung	R
	female	badminton	2009	2009-12-31	35	Julia Pei Xian WONG	MAS	---	R		female	badminton	CHAN Kaka Tsz Ka	R
	female	badminton	2009	2009-12-31	36	Porntip BURANAPRASERTSUK	THA	---	R		female	badminton	CHANG Ya Lan	R
	female	badminton	2009	2009-12-31	37	Linda ZETCHIRI	BUL	---	L		female	badminton	Charmaine REID	R
	female	badminton	2009	2009-12-31	38	Nicole GRETHER	CAN	---	R		female	badminton	CHEN Hsiao Huan	R
	female	badminton	2009	2009-12-31	39	Aiying XING	SIN	---	R		female	badminton	CHEN Xiao Jia	R
	female	badminton	2009	2009-12-31	40	Aditi MUTATKAR	IND	---	R		female	badminton	CHENG Chi Ya	R
	female	badminton	2009	2009-12-31	41	Fransiska RATNASARI	INA	---	R		female	badminton	CHENG Shao Chieh	R
	female	badminton	2009	2009-12-31	42	Mayu SEKIYA	JPN	---	R		female	badminton	CHEUNG Ngan Yi	R
	female	badminton	2009	2009-12-31	43	Anna RICE	CAN	---	R		female	badminton	Chia Hsin LEE	R
	female	badminton	2009	2009-12-31	44	Anu NIEMINEN	FIN	---	R		female	badminton	CHIANG Pei Hsin	R
	female	badminton	2009	2009-12-31	45	Maja TVRDY	SLO	---	R		female	badminton	Chloe MAGEE	R
	female	badminton	2009	2009-12-31	46	Tatjana BIBIK	RUS	---	R		female	badminton	Christin TSAI	R
	female	badminton	2009	2009-12-31	47	Kristina GAVNHOLT	CZE	---	R		female	badminton	Christina AICARDI	R
	female	badminton	2009	2009-12-31	48	Rachel VAN CUTSEN	NED	---	R		female	badminton	Claudia MAYER	R
	female	badminton	2009	2009-12-31	49	Jeanine CICOGNINI	ITA	---	R		female	badminton	Claudia RIVERO MODENSI	R
	female	badminton	2009	2009-12-31	50	Elizabeth CANN	JEY	---	R		female	badminton	Danica NISHIMURA	R
	female	badminton	2009	2009-12-31	51	Mingtian FU	SIN	---	R		female	badminton	Daniela MACIAS	R
	female	badminton	2009	2009-12-31	52	BAE Yeon Ju	KOR	---	L		female	badminton	Delphine LANSAC	R
	female	badminton	2009	2009-12-31	53	Maria Kristin YULIANTI	INA	---	R		female	badminton	DENG Xuan	L
	female	badminton	2009	2009-12-31	54	Elena PRUS	UKR	---	R		female	badminton	Elena PRUS	R
	female	badminton	2009	2009-12-31	55	Charmaine REID	CAN	---	R		female	badminton	Elisabeth BALDAUF	R
	female	badminton	2009	2009-12-31	56	Anita Raj KAUR	MAS	---	R		female	badminton	Elizabeth CANN	R
	female	badminton	2009	2009-12-31	57	Sayali GOKHALE	IND	---	R		female	badminton	Ella DIEHL	R
	female	badminton	2009	2009-12-31	58	SUNG Ji Hyun	KOR	---	R		female	badminton	Eriko HIROSE	R
	female	badminton	2009	2009-12-31	59	Jill PITTARD	ENG	---	R		female	badminton	Evgeniya KOSETSKAYA	R
	female	badminton	2009	2009-12-31	60	Yu HIRAYAMA	JPN	---	R		female	badminton	Fabiana SILVA	R
	female	badminton	2009	2009-12-31	61	CHAN Kaka Tsz Ka	HKG	---	R		female	badminton	Febby ANGGUNI	R
	female	badminton	2009	2009-12-31	62	CHEN Hsiao Huan	TPE	---	R		female	badminton	Fontaine Mica CHAPMAN	R
	female	badminton	2009	2009-12-31	63	Trupti MURGUNDE	IND	---	R		female	badminton	Fransiska RATNASARI	R
	female	badminton	2009	2009-12-31	64	Sapsiree TAERATTANACHAI	THA	---	R		female	badminton	Grace GABRIEL	R
	female	badminton	2009	2009-12-31	65	MONG Kwan Yi	HKG	---	R		female	badminton	HAN Li	R
	female	badminton	2009	2009-12-31	66	Nanna BROSOLAT JENSEN	DEN	---	R		female	badminton	Hana RAMADHINI	R
	female	badminton	2009	2009-12-31	67	Michelle CHAN KY	NZL	---	R		female	badminton	Helen DAVIES	R
	female	badminton	2009	2009-12-31	68	Lianne TAN	BEL	---	R		female	badminton	Hera DESI	R
	female	badminton	2009	2009-12-31	69	Olga KONON	GER	---	R		female	badminton	HSU Ya Ching	R
	female	badminton	2009	2009-12-31	70	Kaori IMABEPPU	JPN	---	R		female	badminton	Huaiwen XU	R
	female	badminton	2009	2009-12-31	71	Chloe MAGEE	IRL	---	R		female	badminton	HUI Xirui	L
	female	badminton	2009	2009-12-31	72	Sannatasah SANIRU	MAS	---	R		female	badminton	HUI ZHOU	R
	female	badminton	2009	2009-12-31	73	Ratchanok INTANON	THA	---	R		female	badminton	HUNG Shih Han	R
	female	badminton	2009	2009-12-31	74	Anne HALD JENSEN	DEN	---	R		female	badminton	HWANG Hye Youn	R
	female	badminton	2009	2009-12-31	75	Nguyen Nhung LE NGOC	VIE	---	R		female	badminton	Iris WANG	R
	female	badminton	2009	2009-12-31	76	Shizuka Uchida	JPN	---	R		female	badminton	Jamie SUBANDHI	R
	female	badminton	2009	2009-12-31	77	JANG(F) Soo Young	KOR	---	R		female	badminton	JANG(F) Soo Young	R
	female	badminton	2009	2009-12-31	78	Huaiwen XU	GER	---	R		female	badminton	Jeanine CICOGNINI	R
	female	badminton	2009	2009-12-31	79	Jiayuan CHEN	SIN	---	R		female	badminton	JIANG Yanjiao	L
	female	badminton	2009	2009-12-31	80	Karin SCHNAASE	GER	---	R		female	badminton	Jiayuan CHEN	R
	female	badminton	2009	2009-12-31	81	Helen DAVIES	ENG	---	R		female	badminton	Jill PITTARD	R
	female	badminton	2009	2009-12-31	82	CHENG Shao Chieh	TPE	---	R		female	badminton	Jing Yi TEE	R
	female	badminton	2009	2009-12-31	83	Camilla SORENSEN	DEN	---	R		female	badminton	Joycelyn KO	R
	female	badminton	2009	2009-12-31	84	Nitchaon JINDAPOL	THA	---	R		female	badminton	Juan GU	R
	female	badminton	2009	2009-12-31	85	Karen FOO KUNE	MRI	---	R		female	badminton	Judith MEULENDIJKS	R
	female	badminton	2009	2009-12-31	86	Neha PANDIT	IND	---	R		female	badminton	Julia Pei Xian WONG	R
	female	badminton	2009	2009-12-31	87	Karina JORGENSEN	DEN	---	R		female	badminton	Juliane SCHENK	R
	female	badminton	2009	2009-12-31	88	Carola BOTT	GER	---	R		female	badminton	Kamila AUGUSTYN	L
	female	badminton	2009	2009-12-31	89	Rena WANG	USA	---	R		female	badminton	Kana ITO	R
	female	badminton	2009	2009-12-31	90	Kati TOLMOFF	EST	---	R		female	badminton	Kaori IMABEPPU	R
	female	badminton	2009	2009-12-31	91	Nathalie DESCAMPS	BEL	---	R		female	badminton	Karen FOO KUNE	R
	female	badminton	2009	2009-12-31	92	CHIANG Pei Hsin	TPE	---	R		female	badminton	Karin SCHNAASE	R
	female	badminton	2009	2009-12-31	93	Olga GOLOVANOVA	RUS	---	R		female	badminton	Karina JORGENSEN	R
	female	badminton	2009	2009-12-31	94	Claudia RIVERO MODENSI	PER	---	R		female	badminton	Karoliine HOIM	R
	female	badminton	2009	2009-12-31	95	Rachel HOWARD	ENG	---	R		female	badminton	Karyn VELEZ	R
	female	badminton	2009	2009-12-31	96	Sophia HANSSON	SWE	---	R		female	badminton	Kate FOO KUNE	L
	female	badminton	2009	2009-12-31	97	HUNG Shih Han	TPE	---	R		female	badminton	Kati TOLMOFF	R
	female	badminton	2009	2009-12-31	98	Patty STOLZENBACH	NED	---	R		female	badminton	KIM Hyo Min	R
	female	badminton	2009	2009-12-31	99	Alesia ZAITSAVA	BLR	---	R		female	badminton	KIM Moon Hi	R
	female	badminton	2009	2009-12-31	100	CHAN Hung Yung	HKG	---	R		female	badminton	Kirsty GILMOUR	R
	female	badminton	2010	2010-12-30	1	WANG Xin	CHN	---	L		female	badminton	Kristina GAVNHOLT	R
	female	badminton	2010	2010-12-30	2	WANG Shixian	CHN	---	R		female	badminton	Ksenia POLIKARPOVA	R
	female	badminton	2010	2010-12-30	3	WANG Yihan	CHN	---	R		female	badminton	Larisa GRIGA	R
	female	badminton	2010	2010-12-30	4	Saina NEHWAL	IND	---	R		female	badminton	Li Lian YANG	R
	female	badminton	2010	2010-12-30	5	Tine BAUN	DEN	---	R		female	badminton	LI Xuerui	R
	female	badminton	2010	2010-12-30	6	JIANG Yanjiao	CHN	---	L		female	badminton	Lianne TAN	R
	female	badminton	2010	2010-12-30	7	Juliane SCHENK	GER	---	R		female	badminton	Linda ZETCHIRI	L
	female	badminton	2010	2010-12-30	8	BAE Yeon Ju	KOR	---	L		female	badminton	Lindaweni FANETRI	R
	female	badminton	2010	2010-12-30	9	PI Hongyan	FRA	---	R		female	badminton	Line KJAERSFELDT	R
	female	badminton	2010	2010-12-30	10	YIP Pui Yin	HKG	---	R		female	badminton	LIU Xin (F)	R
	female	badminton	2010	2010-12-30	11	LI Xuerui	CHN	---	R		female	badminton	Lohaynny VICENTE	R
	female	badminton	2010	2010-12-30	12	Ella DIEHL	RUS	---	R		female	badminton	LU Lan	R
	female	badminton	2010	2010-12-30	13	Eriko HIROSE	JPN	---	R		female	badminton	Luz Maria ZORNOZA	R
	female	badminton	2010	2010-12-30	14	YAO Jie	NED	---	R		female	badminton	Lyddia Yi Yu CHEAH	R
	female	badminton	2010	2010-12-30	15	Petya NEDELCHEVA	BUL	---	R		female	badminton	Maja TVRDY	R
	female	badminton	2010	2010-12-30	16	SUNG Ji Hyun	KOR	---	R		female	badminton	Maria Febe KUSUMASTUTI	R
	female	badminton	2010	2010-12-30	17	CHENG Shao Chieh	TPE	---	R		female	badminton	Maria Kristin YULIANTI	R
	female	badminton	2010	2010-12-30	18	Ai GOTO	JPN	---	R		female	badminton	Maria ULITINA	R
	female	badminton	2010	2010-12-30	19	Salakjit PONSANA	THA	---	R		female	badminton	Mariana UGALDE	L
	female	badminton	2010	2010-12-30	20	TAI Tzu Ying	TPE	---	R		female	badminton	Mayu SEKIYA	R
	female	badminton	2010	2010-12-30	21	Ratchanok INTANON	THA	---	R		female	badminton	Maziyyah NADHIR	L
	female	badminton	2010	2010-12-30	22	BAE Seung Hee	KOR	---	R		female	badminton	Megumi TARUNO	L
	female	badminton	2010	2010-12-30	23	LIU Xin (F)	CHN	---	R		female	badminton	Mette POULSEN	L
	female	badminton	2010	2010-12-30	24	Mew Choo WONG	MAS	---	R		female	badminton	Mew Choo WONG	R
	female	badminton	2010	2010-12-30	25	Porntip BURANAPRASERTSUK	THA	---	R		female	badminton	Michelle CHAN KY	R
	female	badminton	2010	2010-12-30	26	KIM Moon Hi	KOR	---	R		female	badminton	Michelle LI	R
	female	badminton	2010	2010-12-30	27	Judith MEULENDIJKS	NED	---	R		female	badminton	Millicent WIRANTO	R
	female	badminton	2010	2010-12-30	28	Sayaka SATO	JPN	---	L		female	badminton	Minatsu MITANI	R
	female	badminton	2010	2010-12-30	29	Linda ZETCHIRI	BUL	---	L		female	badminton	Mingtian FU	R
	female	badminton	2010	2010-12-30	30	LU Lan	CHN	---	R		female	badminton	MONG Kwan Yi	R
	female	badminton	2010	2010-12-30	31	Maria Febe KUSUMASTUTI	INA	---	R		female	badminton	Monika FASUNGOVA	R
	female	badminton	2010	2010-12-30	32	Elizabeth CANN	JEY	---	R		female	badminton	Nanna BROSOLAT JENSEN	R
	female	badminton	2010	2010-12-30	33	Larisa GRIGA	UKR	---	R		female	badminton	Natalia PERMINOVA	R
	female	badminton	2010	2010-12-30	34	ZHOU Mi	HKG	---	R		female	badminton	Nathalie DESCAMPS	R
	female	badminton	2010	2010-12-30	35	Susan EGELSTAFF	SCO	---	R		female	badminton	Neha PANDIT	R
	female	badminton	2010	2010-12-30	36	Fransiska RATNASARI	INA	---	R		female	badminton	Neslihan YIGIT	R
	female	badminton	2010	2010-12-30	37	HUI ZHOU	CHN	---	R		female	badminton	Nguyen Nhung LE NGOC	R
	female	badminton	2010	2010-12-30	38	CHAN Kaka Tsz Ka	HKG	---	R		female	badminton	Nicola CERFONTYNE	R
	female	badminton	2010	2010-12-30	39	Yu HIRAYAMA	JPN	---	R		female	badminton	Nicole GRETHER	R
	female	badminton	2010	2010-12-30	40	Adrianti FIRDASARI	INA	---	R		female	badminton	Nicole SCHALLER	R
	female	badminton	2010	2010-12-30	41	Anastasia PROKOPENKO	RUS	---	R		female	badminton	Nitchaon JINDAPOL	R
	female	badminton	2010	2010-12-30	42	Jeanine CICOGNINI	ITA	---	R		female	badminton	Nozomi OKUHARA	R
	female	badminton	2010	2010-12-30	43	Michelle LI	CAN	---	R		female	badminton	Olga GOLOVANOVA	R
	female	badminton	2010	2010-12-30	44	Tatjana BIBIK	RUS	---	R		female	badminton	Olga KONON	R
	female	badminton	2010	2010-12-30	45	Nicole GRETHER	CAN	---	R		female	badminton	Ozge BAYRAK	R
	female	badminton	2010	2010-12-30	46	Shizuka Uchida	JPN	---	R		female	badminton	Oznur CALISKAN	R
	female	badminton	2010	2010-12-30	47	Olga KONON	GER	---	R		female	badminton	P. C. Thulasi	R
	female	badminton	2010	2010-12-30	48	Lindaweni FANETRI	INA	---	R		female	badminton	PAI Hsiao Ma	R
	female	badminton	2010	2010-12-30	49	Aiying XING	SIN	---	R		female	badminton	PAI Yu Po	R
	female	badminton	2010	2010-12-30	50	Juan GU	SIN	---	R		female	badminton	Panuga RIOU	R
	female	badminton	2010	2010-12-30	51	WANG Lin	CHN	---	R		female	badminton	Patty STOLZENBACH	R
	female	badminton	2010	2010-12-30	52	Cee Nantana KETPURA	USA	---	R		female	badminton	Perrine LE BUHANIC	R
	female	badminton	2010	2010-12-30	53	Jiayuan CHEN	SIN	---	R		female	badminton	Petya NEDELCHEVA	R
	female	badminton	2010	2010-12-30	54	Rena WANG	USA	---	R		female	badminton	PI Hongyan	R
	female	badminton	2010	2010-12-30	55	Aprillia YUSWANDARI	INA	---	R		female	badminton	POON Lok Yan	R
	female	badminton	2010	2010-12-30	56	Beiwen ZHANG	USA	---	R		female	badminton	Pornpawee CHOCHUWONG	R
	female	badminton	2010	2010-12-30	57	Charmaine REID	CAN	---	R		female	badminton	Porntip BURANAPRASERTSUK	R
	female	badminton	2010	2010-12-30	58	Karina JORGENSEN	DEN	---	R		female	badminton	PUSARLA V. Sindhu	R
	female	badminton	2010	2010-12-30	59	Karin SCHNAASE	GER	---	R		female	badminton	Rachel HONDERICH	R
	female	badminton	2010	2010-12-30	60	CHEN Hsiao Huan	TPE	---	R		female	badminton	Rachel HOWARD	R
	female	badminton	2010	2010-12-30	61	Mingtian FU	SIN	---	R		female	badminton	Rachel VAN CUTSEN	R
	female	badminton	2010	2010-12-30	62	Ayane KURIHARA	JPN	---	R		female	badminton	Ragna INGOLFSDOTTIR	R
	female	badminton	2010	2010-12-30	63	Sashina VIGNES WARAN	FRA	---	R		female	badminton	Ratchanok INTANON	R
	female	badminton	2010	2010-12-30	64	Chloe MAGEE	IRL	---	R		female	badminton	Rawinda PRAJONGJAI	R
	female	badminton	2010	2010-12-30	65	Ana ROVITA	INA	---	R		female	badminton	Rena WANG	R
	female	badminton	2010	2010-12-30	66	Maja TVRDY	SLO	---	R		female	badminton	Romina GABDULLINA	R
	female	badminton	2010	2010-12-30	67	Kristina GAVNHOLT	CZE	---	R		female	badminton	Rong SCHAFER	R
	female	badminton	2010	2010-12-30	68	HUNG Shih Han	TPE	---	R		female	badminton	Sabrina JAQUET	R
	female	badminton	2010	2010-12-30	69	Anne HALD JENSEN	DEN	---	R		female	badminton	Saili RANE	R
	female	badminton	2010	2010-12-30	70	Nitchaon JINDAPOL	THA	---	R		female	badminton	Saina NEHWAL	R
	female	badminton	2010	2010-12-30	71	Simone PRUTSCH	AUT	---	R		female	badminton	Salakjit PONSANA	R
	female	badminton	2010	2010-12-30	72	Telma SANTOS	POR	---	R		female	badminton	Sandra-Maria JENSEN	R
	female	badminton	2010	2010-12-30	73	Lianne TAN	BEL	---	R		female	badminton	Sannatasah SANIRU	R
	female	badminton	2010	2010-12-30	74	Agnese ALLEGRINI	ITA	---	R		female	badminton	Sapsiree TAERATTANACHAI	R
	female	badminton	2010	2010-12-30	75	WANG Rong	MAC	---	R		female	badminton	Sarah WALKER	R
	female	badminton	2010	2010-12-30	76	Elena PRUS	UKR	---	R		female	badminton	Sashina VIGNES WARAN	R
	female	badminton	2010	2010-12-30	77	PAI Hsiao Ma	TPE	---	R		female	badminton	Sayaka SATO	L
	female	badminton	2010	2010-12-30	78	Ragna INGOLFSDOTTIR	ISL	---	R		female	badminton	Sayaka TAKAHASHI	L
	female	badminton	2010	2010-12-30	79	Joycelyn KO	CAN	---	R		female	badminton	Sayali GOKHALE	R
	female	badminton	2010	2010-12-30	80	Carolina MARIN	ESP	---	L		female	badminton	Shizuka Uchida	R
	female	badminton	2010	2010-12-30	81	Aditi MUTATKAR	IND	---	R		female	badminton	Simone PRUTSCH	R
	female	badminton	2010	2010-12-30	82	Anu NIEMINEN	FIN	---	R		female	badminton	Soniia Su Ya CHEAH	R
	female	badminton	2010	2010-12-30	83	ZHU Lin	CHN	---	R		female	badminton	Sophia HANSSON	R
	female	badminton	2010	2010-12-30	84	Alesia ZAITSAVA	BLR	---	R		female	badminton	Soraya DE VISCH EIJBERGEN	R
	female	badminton	2010	2010-12-30	85	Perrine LE BUHANIC	FRA	---	R		female	badminton	Stefani STOEVA	R
	female	badminton	2010	2010-12-30	86	Maria Kristin YULIANTI	INA	---	R		female	badminton	SUN Yu	R
	female	badminton	2010	2010-12-30	87	Kaori IMABEPPU	JPN	---	R		female	badminton	SUNG Ji Hyun	R
	female	badminton	2010	2010-12-30	88	Karyn VELEZ	USA	---	R		female	badminton	SUO Di	R
	female	badminton	2010	2010-12-30	89	Olga GOLOVANOVA	RUS	---	R		female	badminton	Susan EGELSTAFF	R
	female	badminton	2010	2010-12-30	90	Trupti MURGUNDE	IND	---	R		female	badminton	TAI Tzu Ying	R
	female	badminton	2010	2010-12-30	91	Christina AICARDI	PER	---	R		female	badminton	Tanvi LAD	R
	female	badminton	2010	2010-12-30	92	Patty STOLZENBACH	NED	---	R		female	badminton	Tatjana BIBIK	R
	female	badminton	2010	2010-12-30	93	Oznur CALISKAN	TUR	---	R		female	badminton	Telma SANTOS	R
	female	badminton	2010	2010-12-30	94	Camilla SORENSEN	DEN	---	R		female	badminton	Thi Trang (B) VU	R
	female	badminton	2010	2010-12-30	95	Michelle CHAN KY	NZL	---	R		female	badminton	Tine BAUN	R
	female	badminton	2010	2010-12-30	96	Claudia RIVERO MODENSI	PER	---	R		female	badminton	Trupti MURGUNDE	R
	female	badminton	2010	2010-12-30	97	Megumi TARUNO	JPN	---	L		female	badminton	TSE Ying Suet	L
	female	badminton	2010	2010-12-30	98	Kana ITO	JPN	---	R		female	badminton	Victoria MONTERO	R
	female	badminton	2010	2010-12-30	99	Sabrina JAQUET	SUI	---	R		female	badminton	Victoria NA	R
	female	badminton	2010	2010-12-30	100	Sayali GOKHALE	IND	---	R		female	badminton	WANG Chen	R
	female	badminton	2011	2011-12-29	1	WANG Yihan	CHN	---	R		female	badminton	WANG Lin	R
	female	badminton	2011	2011-12-29	2	WANG Xin	CHN	---	L		female	badminton	WANG Rong	R
	female	badminton	2011	2011-12-29	3	WANG Shixian	CHN	---	R		female	badminton	WANG Shixian	R
	female	badminton	2011	2011-12-29	4	Saina NEHWAL	IND	---	R		female	badminton	WANG Xin	L
	female	badminton	2011	2011-12-29	5	Tine BAUN	DEN	---	R		female	badminton	WANG Yihan	R
	female	badminton	2011	2011-12-29	6	JIANG Yanjiao	CHN	---	L		female	badminton	XIE Xingfang	R
	female	badminton	2011	2011-12-29	7	SUNG Ji Hyun	KOR	---	R		female	badminton	YAO Jie	R
	female	badminton	2011	2011-12-29	8	Juliane SCHENK	GER	---	R		female	badminton	YAO Xue	R
	female	badminton	2011	2011-12-29	9	LI Xuerui	CHN	---	R		female	badminton	Yeni ASMARANI	R
	female	badminton	2011	2011-12-29	10	LIU Xin (F)	CHN	---	R		female	badminton	YIP Pui Yin	R
	female	badminton	2011	2011-12-29	11	CHENG Shao Chieh	TPE	---	R		female	badminton	Yu HIRAYAMA	R
	female	badminton	2011	2011-12-29	12	Porntip BURANAPRASERTSUK	THA	---	R		female	badminton	Yui HASHIMOTO	R
	female	badminton	2011	2011-12-29	13	Ratchanok INTANON	THA	---	R		female	badminton	Yuka KUSUNOSE	R
	female	badminton	2011	2011-12-29	14	BAE Yeon Ju	KOR	---	L		female	badminton	ZHOU Mi	R
	female	badminton	2011	2011-12-29	15	Sayaka SATO	JPN	---	L		female	badminton	ZHU Lin	R
	female	badminton	2011	2011-12-29	16	TAI Tzu Ying	TPE	---	R		female	badminton	Zuzana PAVELKOVA	R
	female	badminton	2011	2011-12-29	17	Petya NEDELCHEVA	BUL	---	R		female	squash	Adel Weir	R
	female	badminton	2011	2011-12-29	18	Eriko HIROSE	JPN	---	R		female	squash	Aisling Blake	R
	female	badminton	2011	2011-12-29	19	YIP Pui Yin	HKG	---	R		female	squash	Alana Miller	R
	female	badminton	2011	2011-12-29	20	Juan GU	SIN	---	R		female	squash	Alexandra Fuller	R
	female	badminton	2011	2011-12-29	21	Ai GOTO	JPN	---	R		female	squash	Alexandra Norman	R
	female	badminton	2011	2011-12-29	22	YAO Jie	NED	---	R		female	squash	Alison Waters	R
	female	badminton	2011	2011-12-29	23	PI Hongyan	FRA	---	R		female	squash	Alix Younger	R
	female	badminton	2011	2011-12-29	24	Michelle LI	CAN	---	R		female	squash	Amanda Cranston	R
	female	badminton	2011	2011-12-29	25	Mingtian FU	SIN	---	R		female	squash	Amanda Landers-Murphy	L
	female	badminton	2011	2011-12-29	26	Carolina MARIN	ESP	---	L		female	squash	Amanda Sobhy	L
	female	badminton	2011	2011-12-29	27	PAI Hsiao Ma	TPE	---	R		female	squash	Amelia Pittock	R
	female	badminton	2011	2011-12-29	28	Linda ZETCHIRI	BUL	---	L		female	squash	Anaka Alankamony	R
	female	badminton	2011	2011-12-29	29	Ayane KURIHARA	JPN	---	R		female	squash	Anna-Carin Forstadius	R
	female	badminton	2011	2011-12-29	30	CHAN Kaka Tsz Ka	HKG	---	R		female	squash	Annelize Naude	R
	female	badminton	2011	2011-12-29	31	PUSARLA V. Sindhu	IND	---	R		female	squash	Annie Au	L
	female	badminton	2011	2011-12-29	32	LU Lan	CHN	---	R		female	squash	Aparajitha Balamurukan	R
	female	badminton	2011	2011-12-29	33	Susan EGELSTAFF	SCO	---	R		female	squash	Belen Etchechoury	N/A
	female	badminton	2011	2011-12-29	34	Minatsu MITANI	JPN	---	R		female	squash	Birgit Coufal	R
	female	badminton	2011	2011-12-29	35	Sapsiree TAERATTANACHAI	THA	---	R		female	squash	Camille Serme	R
	female	badminton	2011	2011-12-29	36	Kaori IMABEPPU	JPN	---	R		female	squash	Carmen Lee	R
	female	badminton	2011	2011-12-29	37	Larisa GRIGA	UKR	---	R		female	squash	Carolyn Russell	N/A
	female	badminton	2011	2011-12-29	38	Anastasia PROKOPENKO	RUS	---	R		female	squash	Carrie Ramsey	R
	female	badminton	2011	2011-12-29	39	Lindaweni FANETRI	INA	---	R		female	squash	Catalina Pelaez	R
	female	badminton	2011	2011-12-29	40	Adrianti FIRDASARI	INA	---	R		female	squash	Cecelia Cortes	L
	female	badminton	2011	2011-12-29	41	Salakjit PONSANA	THA	---	R		female	squash	Celia Allamargot	R
	female	badminton	2011	2011-12-29	42	Agnese ALLEGRINI	ITA	---	R		female	squash	Cheyna Tucker	R
	female	badminton	2011	2011-12-29	43	Olga KONON	GER	---	R		female	squash	Chinatsu Matsui	L
	female	badminton	2011	2011-12-29	44	Aprillia YUSWANDARI	INA	---	R		female	squash	Chloe Mesic	L
	female	badminton	2011	2011-12-29	45	Maria Febe KUSUMASTUTI	INA	---	R		female	squash	Christina Mak	R
	female	badminton	2011	2011-12-29	46	Jeanine CICOGNINI	ITA	---	R		female	squash	Christine Nunn	R
	female	badminton	2011	2011-12-29	47	Nicole GRETHER	CAN	---	R		female	squash	Coline Aumard	R
	female	badminton	2011	2011-12-29	48	Chloe MAGEE	IRL	---	R		female	squash	Cyrielle Peltier	R
	female	badminton	2011	2011-12-29	49	Karina JORGENSEN	DEN	---	R		female	squash	Delia Arnold	R
	female	badminton	2011	2011-12-29	50	CHEN Xiao Jia	CHN	---	R		female	squash	Deon Saffery	R
	female	badminton	2011	2011-12-29	51	Arundhati PANTAWANE	IND	---	R		female	squash	Diana Garcia	R
	female	badminton	2011	2011-12-29	52	Rena WANG	USA	---	R		female	squash	Dipika Pallikal	R
	female	badminton	2011	2011-12-29	53	Anne HALD JENSEN	DEN	---	R		female	squash	Dominique Lloyd-Walter	R
	female	badminton	2011	2011-12-29	54	Elizabeth CANN	JEY	---	R		female	squash	Donna Urquhart	L
	female	badminton	2011	2011-12-29	55	Lianne TAN	BEL	---	R		female	squash	Elise Ng	R
	female	badminton	2011	2011-12-29	56	Judith MEULENDIJKS	NED	---	R		female	squash	Elpiniki Clement	L
	female	badminton	2011	2011-12-29	57	Jiayuan CHEN	SIN	---	R		female	squash	Emily Whitlock	R
	female	badminton	2011	2011-12-29	58	Karin SCHNAASE	GER	---	R		female	squash	Emma Beddoes	R
	female	badminton	2011	2011-12-29	59	Jing Yi TEE	MAS	---	R		female	squash	Emma Chorley	N/A
	female	badminton	2011	2011-12-29	60	Kristina GAVNHOLT	CZE	---	R		female	squash	Engy Kheirallah	R
	female	badminton	2011	2011-12-29	61	Fransiska RATNASARI	INA	---	R		female	squash	Eun Chan Ahn	R
	female	badminton	2011	2011-12-29	62	Ozge BAYRAK	TUR	---	R		female	squash	Farah Abdel Meguid	R
	female	badminton	2011	2011-12-29	63	Sashina VIGNES WARAN	FRA	---	R		female	squash	Fiona Moverley	R
	female	badminton	2011	2011-12-29	64	TSE Ying Suet	HKG	---	L		female	squash	Gaby Huber	R
	female	badminton	2011	2011-12-29	65	Victoria MONTERO	MEX	---	R		female	squash	Genevieve Lessard	N/A
	female	badminton	2011	2011-12-29	66	Tatjana BIBIK	RUS	---	R		female	squash	Gu Jinyue	R
	female	badminton	2011	2011-12-29	67	Telma SANTOS	POR	---	R		female	squash	Habiba Mohamed	R
	female	badminton	2011	2011-12-29	68	Anu NIEMINEN	FIN	---	R		female	squash	Heba El Torky	R
	female	badminton	2011	2011-12-29	69	Michelle CHAN KY	NZL	---	R		female	squash	Hollie Naughton	L
	female	badminton	2011	2011-12-29	70	Ragna INGOLFSDOTTIR	ISL	---	R		female	squash	Imelda Salazar Martinez	R
	female	badminton	2011	2011-12-29	71	Joycelyn KO	CAN	---	R		female	squash	Irina Assal	R
	female	badminton	2011	2011-12-29	72	Aiying XING	SIN	---	R		female	squash	Isabelle Stoehr	R
	female	badminton	2011	2011-12-29	73	Aditi MUTATKAR	IND	---	R		female	squash	Ivonne Diaz	R
	female	badminton	2011	2011-12-29	74	Hera DESI	INA	---	R		female	squash	Jaclyn Hawkes	R
	female	badminton	2011	2011-12-29	75	Sabrina JAQUET	SUI	---	R		female	squash	Jenna Gates	N/A
	female	badminton	2011	2011-12-29	76	Charmaine REID	CAN	---	R		female	squash	Jenny Duncalf	R
	female	badminton	2011	2011-12-29	77	Claudia MAYER	AUT	---	R		female	squash	Jessica Turnbull	N/A
	female	badminton	2011	2011-12-29	78	Simone PRUTSCH	AUT	---	R		female	squash	Joelle King	R
	female	badminton	2011	2011-12-29	79	Maja TVRDY	SLO	---	R		female	squash	Joey Chan	L
	female	badminton	2011	2011-12-29	80	Neslihan YIGIT	TUR	---	R		female	squash	Josefa Bertilsson	R
	female	badminton	2011	2011-12-29	81	POON Lok Yan	HKG	---	R		female	squash	Joshna Chinappa	R
	female	badminton	2011	2011-12-29	82	Bellaetrix MANUPUTTY	INA	---	R		female	squash	Julia Le Coq	R
	female	badminton	2011	2011-12-29	83	Nozomi OKUHARA	JPN	---	R		female	squash	Kanzy Emad El Defrawy	R
	female	badminton	2011	2011-12-29	84	Kamila AUGUSTYN	POL	---	L		female	squash	Karina Heredia Gonzalez	R
	female	badminton	2011	2011-12-29	85	Nitchaon JINDAPOL	THA	---	R		female	squash	Karman Siu	R
	female	badminton	2011	2011-12-29	86	Karyn VELEZ	USA	---	R		female	squash	Kasey Brown	R
	female	badminton	2011	2011-12-29	87	Lyddia Yi Yu CHEAH	MAS	---	R		female	squash	Kim Ga-Hye	N/A
	female	badminton	2011	2011-12-29	88	HAN Li	CHN	---	R		female	squash	Kristen Lange	R
	female	badminton	2011	2011-12-29	89	Victoria NA	AUS	---	R		female	squash	Kylie Lindsay	R
	female	badminton	2011	2011-12-29	90	Carola BOTT	GER	---	R		female	squash	Lakeesha Rarere	R
	female	badminton	2011	2011-12-29	91	Iris WANG	USA	---	R		female	squash	Larissa Huffer	R
	female	badminton	2011	2011-12-29	92	Mew Choo WONG	MAS	---	R		female	squash	Latasha Khan	R
	female	badminton	2011	2011-12-29	93	CHEN Hsiao Huan	TPE	---	R		female	squash	Laura Hill	R
	female	badminton	2011	2011-12-29	94	Beatriz CORRALES	ESP	---	R		female	squash	Laura Massaro	R
	female	badminton	2011	2011-12-29	95	Claudia RIVERO MODENSI	PER	---	R		female	squash	Laura Pomportes	R
	female	badminton	2011	2011-12-29	96	Monika FASUNGOVA	SVK	---	R		female	squash	Lauren Briggs	R
	female	badminton	2011	2011-12-29	97	Christina AICARDI	PER	---	R		female	squash	Lauren Selby	R
	female	badminton	2011	2011-12-29	98	P. C. Thulasi	IND	---	R		female	squash	Lauren Siddall	R
	female	badminton	2011	2011-12-29	99	Karoliine HOIM	EST	---	R		female	squash	Leonie Holt	R
	female	badminton	2011	2011-12-29	100	Akvile STAPUSAITYTE	LTU	---	R		female	squash	Li Dongjin	R
	female	badminton	2012	2012-12-27	1	LI Xuerui	CHN	---	R		female	squash	Lily Taylor	R
	female	badminton	2012	2012-12-27	2	WANG Yihan	CHN	---	R		female	squash	Lim Yoke Wah	R
	female	badminton	2012	2012-12-27	3	Saina NEHWAL	IND	---	R		female	squash	Linda Hruzikova	R
	female	badminton	2012	2012-12-27	4	Juliane SCHENK	GER	---	R		female	squash	Line Hansen	R
	female	badminton	2012	2012-12-27	5	WANG Shixian	CHN	---	R		female	squash	Lisa Aitken	L
	female	badminton	2012	2012-12-27	6	JIANG Yanjiao	CHN	---	L		female	squash	Lisa Camilleri	R
	female	badminton	2012	2012-12-27	7	Tine BAUN	DEN	---	R		female	squash	Liu Kwai Chi	R
	female	badminton	2012	2012-12-27	8	SUNG Ji Hyun	KOR	---	R		female	squash	Liu Tsz-Ling	R
	female	badminton	2012	2012-12-27	9	Ratchanok INTANON	THA	---	R		female	squash	Lotte Eriksen	R
	female	badminton	2012	2012-12-27	10	TAI Tzu Ying	TPE	---	R		female	squash	Low Wee Nee	N/A
	female	badminton	2012	2012-12-27	11	Minatsu MITANI	JPN	---	R		female	squash	Low Wee Wern	R
	female	badminton	2012	2012-12-27	12	Eriko HIROSE	JPN	---	R		female	squash	Lucie Fialova	L
	female	badminton	2012	2012-12-27	13	Porntip BURANAPRASERTSUK	THA	---	R		female	squash	Madeline Perry	R
	female	badminton	2012	2012-12-27	14	BAE Yeon Ju	KOR	---	L		female	squash	Maggy Marshall	N/A
	female	badminton	2012	2012-12-27	15	WANG Xin	CHN	---	L		female	squash	Manuela Manetta	R
	female	badminton	2012	2012-12-27	16	Juan GU	SIN	---	R		female	squash	Maria Antonella Falcione	R
	female	badminton	2012	2012-12-27	17	Busanan ONGBUMRUNGPHAN	THA	---	R		female	squash	Maria Toorpakai Wazir	R
	female	badminton	2012	2012-12-27	18	CHENG Shao Chieh	TPE	---	R		female	squash	Mariam Metwally	R
	female	badminton	2012	2012-12-27	19	PUSARLA V. Sindhu	IND	---	R		female	squash	Maud Duplomb	R
	female	badminton	2012	2012-12-27	20	PAI Hsiao Ma	TPE	---	R		female	squash	Megan Craig	R
	female	badminton	2012	2012-12-27	21	YIP Pui Yin	HKG	---	R		female	squash	Melody Francis	R
	female	badminton	2012	2012-12-27	22	Sapsiree TAERATTANACHAI	THA	---	R		female	squash	Menna Nasser	R
	female	badminton	2012	2012-12-27	23	YAO Jie	NED	---	R		female	squash	Merhan Amr Mahmoud	R
	female	badminton	2012	2012-12-27	24	Petya NEDELCHEVA	BUL	---	R		female	squash	Millie Tomlinson	R
	female	badminton	2012	2012-12-27	25	Lindaweni FANETRI	INA	---	R		female	squash	Milnay Louw	R
	female	badminton	2012	2012-12-27	26	HAN Li	CHN	---	R		female	squash	Milou van der Heijden	R
	female	badminton	2012	2012-12-27	27	Ai GOTO	JPN	---	R		female	squash	Miranda Ranieri	R
	female	badminton	2012	2012-12-27	28	Aprillia YUSWANDARI	INA	---	R		female	squash	Misaki Kobayashi	R
	female	badminton	2012	2012-12-27	29	CHEN Xiao Jia	CHN	---	R		female	squash	Nada Elkalaawy	R
	female	badminton	2012	2012-12-27	30	Sayaka SATO	JPN	---	L		female	squash	Nadine Shahin	R
	female	badminton	2012	2012-12-27	31	Nozomi OKUHARA	JPN	---	R		female	squash	Natalie Grainger	R
	female	badminton	2012	2012-12-27	32	Nitchaon JINDAPOL	THA	---	R		female	squash	Natalie Grinham	R
	female	badminton	2012	2012-12-27	33	Adrianti FIRDASARI	INA	---	R		female	squash	Nayelly Hernandez	R
	female	badminton	2012	2012-12-27	34	Carolina MARIN	ESP	---	L		female	squash	Nele Gilis	R
	female	badminton	2012	2012-12-27	35	Michelle LI	CAN	---	R		female	squash	Nicol David	R
	female	badminton	2012	2012-12-27	36	LIU Xin (F)	CHN	---	R		female	squash	Nicolette Fernandes	R
	female	badminton	2012	2012-12-27	37	CHAN Kaka Tsz Ka	HKG	---	R		female	squash	Nikki Todd	R
	female	badminton	2012	2012-12-27	38	Sayaka TAKAHASHI	JPN	---	L		female	squash	Nour El Sherbini	R
	female	badminton	2012	2012-12-27	39	Kristina GAVNHOLT	CZE	---	R		female	squash	Nour El Tayeb	R
	female	badminton	2012	2012-12-27	40	WANG Lin	CHN	---	R		female	squash	Nouran El Torky	R
	female	badminton	2012	2012-12-27	41	Mingtian FU	SIN	---	R		female	squash	Nouran Gohar	R
	female	badminton	2012	2012-12-27	42	Sashina VIGNES WARAN	FRA	---	R		female	squash	Olga Ertlova	R
	female	badminton	2012	2012-12-27	43	Linda ZETCHIRI	BUL	---	L		female	squash	Olivia Blatchford	R
	female	badminton	2012	2012-12-27	44	Hera DESI	INA	---	R		female	squash	Omneya Abdel Kawy	R
	female	badminton	2012	2012-12-27	45	Michelle CHAN KY	NZL	---	R		female	squash	Orla Noom	L
	female	badminton	2012	2012-12-27	46	Bellaetrix MANUPUTTY	INA	---	R		female	squash	Pamela Chua	R
	female	badminton	2012	2012-12-27	47	Kirsty GILMOUR	SCO	---	R		female	squash	Pushppa Devi	N/A
	female	badminton	2012	2012-12-27	48	Aiying XING	SIN	---	R		female	squash	Rachael Grinham	R
	female	badminton	2012	2012-12-27	49	Neslihan YIGIT	TUR	---	R		female	squash	Rachel Arnold	R
	female	badminton	2012	2012-12-27	50	Maria Febe KUSUMASTUTI	INA	---	R		female	squash	Raneem El Welily	R
	female	badminton	2012	2012-12-27	51	Karin SCHNAASE	GER	---	R		female	squash	Rebecca Chiu	R
	female	badminton	2012	2012-12-27	52	Kaori IMABEPPU	JPN	---	R		female	squash	Runa Reta	R
	female	badminton	2012	2012-12-27	53	Jing Yi TEE	MAS	---	R		female	squash	Sabrina Sobhy	R
	female	badminton	2012	2012-12-27	54	Anastasia PROKOPENKO	RUS	---	R		female	squash	Sally Skaarenborg	R
	female	badminton	2012	2012-12-27	55	Chloe MAGEE	IRL	---	R		female	squash	Salma Hany	R
	female	badminton	2012	2012-12-27	56	PI Hongyan	FRA	---	R		female	squash	Salma Hany Ibrahim	R
	female	badminton	2012	2012-12-27	57	Lyddia Yi Yu CHEAH	MAS	---	R		female	squash	Salma Nassar	L
	female	badminton	2012	2012-12-27	58	Susan EGELSTAFF	SCO	---	R		female	squash	Samantha Cornett	R
	female	badminton	2012	2012-12-27	59	Sabrina JAQUET	SUI	---	R		female	squash	Samantha Foyle	R
	female	badminton	2012	2012-12-27	60	Soniia Su Ya CHEAH	MAS	---	R		female	squash	Samantha Teran	R
	female	badminton	2012	2012-12-27	61	Nicole GRETHER	CAN	---	R		female	squash	Sara El Noamany	R
	female	badminton	2012	2012-12-27	62	Jiayuan CHEN	SIN	---	R		female	squash	Sarah Campion	R
	female	badminton	2012	2012-12-27	63	Sannatasah SANIRU	MAS	---	R		female	squash	Sarah Cardwell	R
	female	badminton	2012	2012-12-27	64	Karina JORGENSEN	DEN	---	R		female	squash	Sarah-Jane Perry	R
	female	badminton	2012	2012-12-27	65	Nicole SCHALLER	SUI	---	R		female	squash	Sharon Wee	R
	female	badminton	2012	2012-12-27	66	Kana ITO	JPN	---	R		female	squash	Shelley Kitchen	R
	female	badminton	2012	2012-12-27	67	Rena WANG	USA	---	R		female	squash	Sina Wall	R
	female	badminton	2012	2012-12-27	68	Jamie SUBANDHI	USA	---	R		female	squash	Siti Munirah Jusoh	R
	female	badminton	2012	2012-12-27	69	Simone PRUTSCH	AUT	---	R		female	squash	Sivasangari Subramaniam	R
	female	badminton	2012	2012-12-27	70	Ozge BAYRAK	TUR	---	R		female	squash	Siyoli Waters	R
	female	badminton	2012	2012-12-27	71	Lianne TAN	BEL	---	R		female	squash	Song Sun-Mi	R
	female	badminton	2012	2012-12-27	72	Olga GOLOVANOVA	RUS	---	R		female	squash	Stephanie Edmison	R
	female	badminton	2012	2012-12-27	73	Elizabeth CANN	JEY	---	R		female	squash	Suzie Pierrepont	R
	female	badminton	2012	2012-12-27	74	Romina GABDULLINA	RUS	---	R		female	squash	Tamika Saxby	R
	female	badminton	2012	2012-12-27	75	Judith MEULENDIJKS	NED	---	R		female	squash	Tan Yan Xin	R
	female	badminton	2012	2012-12-27	76	Alesia ZAITSAVA	BLR	---	R		female	squash	Tania Bailey	R
	female	badminton	2012	2012-12-27	77	Shizuka Uchida	JPN	---	R		female	squash	Tara Mullins	R
	female	badminton	2012	2012-12-27	78	Victoria NA	AUS	---	R		female	squash	Teh Min Jie	R
	female	badminton	2012	2012-12-27	79	Maria ULITINA	UKR	---	R		female	squash	Tenille van der Merwe	R
	female	badminton	2012	2012-12-27	80	Maziyyah NADHIR	INA	---	L		female	squash	Tesni Evans	R
	female	badminton	2012	2012-12-27	81	Beatriz CORRALES	ESP	---	R		female	squash	Thaisa Serafini	R
	female	badminton	2012	2012-12-27	82	Yeni ASMARANI	INA	---	R		female	squash	Tong Tsz-Wing	R
	female	badminton	2012	2012-12-27	83	Li Lian YANG	MAS	---	R		female	squash	Vanessa Atkinson	R
	female	badminton	2012	2012-12-27	84	Larisa GRIGA	UKR	---	R		female	squash	Vanessa Chu	R
	female	badminton	2012	2012-12-27	85	Stefani STOEVA	BUL	---	R		female	squash	Vanessa Pickerd	N/A
	female	badminton	2012	2012-12-27	86	Kamila AUGUSTYN	POL	---	L		female	squash	Vanessa Raj	R
	female	badminton	2012	2012-12-27	87	Salakjit PONSANA	THA	---	R		female	squash	Victoria Bell	R
	female	badminton	2012	2012-12-27	88	Patty STOLZENBACH	NED	---	R		female	squash	Victoria Lust	R
	female	badminton	2012	2012-12-27	89	Anu NIEMINEN	FIN	---	R		female	squash	Victoria Temple-Murray	R
	female	badminton	2012	2012-12-27	90	Akvile STAPUSAITYTE	LTU	---	R		female	squash	Yathreb Adel	R
	female	badminton	2012	2012-12-27	91	Maja TVRDY	SLO	---	R		female	squash	Zephanie Curgenven	R
	female	badminton	2012	2012-12-27	92	Yui HASHIMOTO	JPN	---	R		female	squash	Zoe Foo Yuk Han	R
	female	badminton	2012	2012-12-27	93	Nicola CERFONTYNE	ENG	---	R		female	squash	Zoe Petrovansky	R
	female	badminton	2012	2012-12-27	94	P. C. Thulasi	IND	---	R		female	squash	Zulhijjah Binti Azan	R
	female	badminton	2012	2012-12-27	95	Christin TSAI	CAN	---	R		female	table tennis	ABE Megumi	L
	female	badminton	2012	2012-12-27	96	Carissa TURNER	WAL	---	R		female	table tennis	BALAZOVA Barbora	L
	female	badminton	2012	2012-12-27	97	Karyn VELEZ	USA	---	R		female	table tennis	BARTHEL Zhenqi	R
	female	badminton	2012	2012-12-27	98	Tatjana BIBIK	RUS	---	R		female	table tennis	BILENKO Tetyana	R
	female	badminton	2012	2012-12-27	99	Olga KONON	GER	---	R		female	table tennis	BOROS Tamara	R
	female	badminton	2012	2012-12-27	100	Perrine LE BUHANIC	FRA	---	R		female	table tennis	CAO Lisi	R
	female	badminton	2013	2013-12-26	1	LI Xuerui	CHN	---	R		female	table tennis	CAO Zhen	R
	female	badminton	2013	2013-12-26	2	WANG Shixian	CHN	---	R		female	table tennis	CHANG Chenchen	L
	female	badminton	2013	2013-12-26	3	Ratchanok INTANON	THA	---	R		female	table tennis	CHE Xiaoxi	R
	female	badminton	2013	2013-12-26	4	WANG Yihan	CHN	---	R		female	table tennis	CHEN Meng	R
	female	badminton	2013	2013-12-26	5	SUNG Ji Hyun	KOR	---	R		female	table tennis	CHEN Szu-Yu	R
	female	badminton	2013	2013-12-26	6	BAE Yeon Ju	KOR	---	L		female	table tennis	CHEN Xingtong	R
	female	badminton	2013	2013-12-26	7	TAI Tzu Ying	TPE	---	R		female	table tennis	CHENG I-Ching	R
	female	badminton	2013	2013-12-26	8	Saina NEHWAL	IND	---	R		female	table tennis	CHOI Moonyoung	R	CHOI Moon Young
	female	badminton	2013	2013-12-26	9	Juliane SCHENK	GER	---	R		female	table tennis	DANG Yeseo	R	DANG Ye Seo
	female	badminton	2013	2013-12-26	10	Porntip BURANAPRASERTSUK	THA	---	R		female	table tennis	DING Ning	L
	female	badminton	2013	2013-12-26	11	PUSARLA V. Sindhu	IND	---	R		female	table tennis	DODEAN Daniela	R
	female	badminton	2013	2013-12-26	12	Minatsu MITANI	JPN	---	R		female	table tennis	DOLGIKH Maria	R
	female	badminton	2013	2013-12-26	13	Sayaka TAKAHASHI	JPN	---	L		female	table tennis	DOO Hoi Kem	R
	female	badminton	2013	2013-12-26	14	Nitchaon JINDAPOL	THA	---	R		female	table tennis	DVORAK Galia	R
	female	badminton	2013	2013-12-26	15	Carolina MARIN	ESP	---	L		female	table tennis	EERLAND Britt	R
	female	badminton	2013	2013-12-26	16	Eriko HIROSE	JPN	---	R		female	table tennis	EKHOLM Matilda	L
	female	badminton	2013	2013-12-26	17	Busanan ONGBUMRUNGPHAN	THA	---	R		female	table tennis	ERDELJI Ana-Maria	R
	female	badminton	2013	2013-12-26	18	HAN Li	CHN	---	R		female	table tennis	FADEEVA Oxana	R
	female	badminton	2013	2013-12-26	19	Juan GU	SIN	---	R		female	table tennis	FAN Ying	R
	female	badminton	2013	2013-12-26	20	Lindaweni FANETRI	INA	---	R		female	table tennis	FEHER Gabriela	R
	female	badminton	2013	2013-12-26	21	YIP Pui Yin	HKG	---	R		female	table tennis	FENG Tianwei	R
	female	badminton	2013	2013-12-26	22	Sapsiree TAERATTANACHAI	THA	---	R		female	table tennis	FENG Yalan	R
	female	badminton	2013	2013-12-26	23	Kirsty GILMOUR	SCO	---	R		female	table tennis	FUJII Hiroko	R
	female	badminton	2013	2013-12-26	24	Michelle LI	CAN	---	R		female	table tennis	FUJINUMA Ai	L
	female	badminton	2013	2013-12-26	25	Beatriz CORRALES	ESP	---	R		female	table tennis	FUKUHARA Ai	R
	female	badminton	2013	2013-12-26	26	CHAN Kaka Tsz Ka	HKG	---	R		female	table tennis	FUKUOKA Haruna	R
	female	badminton	2013	2013-12-26	27	Yui HASHIMOTO	JPN	---	R		female	table tennis	GANINA Svetlana	R
	female	badminton	2013	2013-12-26	28	PAI Hsiao Ma	TPE	---	R		female	table tennis	GAO Jun	R
	female	badminton	2013	2013-12-26	29	Aprillia YUSWANDARI	INA	---	R		female	table tennis	GRUNDISCH Carole	R
	female	badminton	2013	2013-12-26	30	YAO Xue	CHN	---	R		female	table tennis	GRZYBOWSKA Katarzyna	R
	female	badminton	2013	2013-12-26	31	SUN Yu	CHN	---	R		female	table tennis	GU Ruochen	R
	female	badminton	2013	2013-12-26	32	Linda ZETCHIRI	BUL	---	L		female	table tennis	GU Yuting	L
	female	badminton	2013	2013-12-26	33	Petya NEDELCHEVA	BUL	---	R		female	table tennis	GUO Yan	R
	female	badminton	2013	2013-12-26	34	Kaori IMABEPPU	JPN	---	R		female	table tennis	GUO Yue	L
	female	badminton	2013	2013-12-26	35	Bellaetrix MANUPUTTY	INA	---	R		female	table tennis	HAMAMOTO Yui	R
	female	badminton	2013	2013-12-26	36	Kristina GAVNHOLT	CZE	---	R		female	table tennis	HAN Hye Song	N/A
	female	badminton	2013	2013-12-26	37	DENG Xuan	CHN	---	L		female	table tennis	HAN Ying	R
	female	badminton	2013	2013-12-26	38	Hera DESI	INA	---	R		female	table tennis	HAYATA Hina	L
	female	badminton	2013	2013-12-26	39	Febby ANGGUNI	INA	---	R		female	table tennis	HE Zhuojia	R
	female	badminton	2013	2013-12-26	40	SUO Di	CHN	---	R		female	table tennis	HIRANO Miu	R
	female	badminton	2013	2013-12-26	41	Beiwen ZHANG	USA	---	R		female	table tennis	HIRANO Sayaka	R
	female	badminton	2013	2013-12-26	42	Sashina VIGNES WARAN	FRA	---	R		female	table tennis	HIURA Reiko	R
	female	badminton	2013	2013-12-26	43	Chloe MAGEE	IRL	---	R		female	table tennis	HSING Ariel	R
	female	badminton	2013	2013-12-26	44	Jamie SUBANDHI	USA	---	R		female	table tennis	HU Limei	R
	female	badminton	2013	2013-12-26	45	Sabrina JAQUET	SUI	---	R		female	table tennis	HU Melek	R
	female	badminton	2013	2013-12-26	46	Maria Febe KUSUMASTUTI	INA	---	R		female	table tennis	HUANG Yi-Hua	R
	female	badminton	2013	2013-12-26	47	Karin SCHNAASE	GER	---	R		female	table tennis	ISHIGAKI Yuka	R
	female	badminton	2013	2013-12-26	48	Natalia PERMINOVA	RUS	---	R		female	table tennis	ISHIKAWA Kasumi	L
	female	badminton	2013	2013-12-26	49	HSU Ya Ching	TPE	---	R		female	table tennis	ITO Mima	R
	female	badminton	2013	2013-12-26	50	Arundhati PANTAWANE	IND	---	R		female	table tennis	IVANCAN Irene	R
	female	badminton	2013	2013-12-26	51	Stefani STOEVA	BUL	---	R		female	table tennis	JEON Jihee ^	L
	female	badminton	2013	2013-12-26	52	Salakjit PONSANA	THA	---	R		female	table tennis	JIANG Huajun	R
	female	badminton	2013	2013-12-26	53	Pornpawee CHOCHUWONG	THA	---	R		female	table tennis	JUN Hye Kyung	R
	female	badminton	2013	2013-12-26	54	HUI Xirui	CHN	---	L		female	table tennis	KANG Misoon ^	L
	female	badminton	2013	2013-12-26	55	Jiayuan CHEN	SIN	---	R		female	table tennis	KATO Miyu	R
	female	badminton	2013	2013-12-26	56	Saili RANE	IND	---	R		female	table tennis	KIM Jong	L
	female	badminton	2013	2013-12-26	57	Line KJAERSFELDT	DEN	---	R		female	table tennis	KIM Kyungah	R	KIM Kyung Ah
	female	badminton	2013	2013-12-26	58	Olga GOLOVANOVA	RUS	---	R		female	table tennis	KIM Mi Yong	L
	female	badminton	2013	2013-12-26	59	Ksenia POLIKARPOVA	RUS	---	R		female	table tennis	KOMWONG Nanthana	R
	female	badminton	2013	2013-12-26	60	Lohaynny VICENTE	BRA	---	R		female	table tennis	KONISHI An	R
	female	badminton	2013	2013-12-26	61	Tanvi LAD	IND	---	R		female	table tennis	KOSTROMINA Tatyana (1973)	R
	female	badminton	2013	2013-12-26	62	Maria ULITINA	UKR	---	R		female	table tennis	KOTIKHINA Irina	R
	female	badminton	2013	2013-12-26	63	Millicent WIRANTO	INA	---	R		female	table tennis	KWAK Bang Bang ^	R
	female	badminton	2013	2013-12-26	64	Yuka KUSUNOSE	JPN	---	R		female	table tennis	LAU Sui Fei	R
	female	badminton	2013	2013-12-26	65	Nicole GRETHER	CAN	---	R		female	table tennis	LEE Eunhee	R	LEE Eun Hee
	female	badminton	2013	2013-12-26	66	Aya OHORI	JPN	---	L		female	table tennis	LEE Ho Ching	R
	female	badminton	2013	2013-12-26	67	Chia Hsin LEE	TPE	---	R		female	table tennis	LEE I-Chen	L
	female	badminton	2013	2013-12-26	68	Nicole SCHALLER	SUI	---	R		female	table tennis	LI Fen ^	R
	female	badminton	2013	2013-12-26	69	Fabiana SILVA	BRA	---	R		female	table tennis	LI Jiao	L
	female	badminton	2013	2013-12-26	70	Soniia Su Ya CHEAH	MAS	---	R		female	table tennis	LI Jiawei	R
	female	badminton	2013	2013-12-26	71	CHENG Chi Ya	TPE	---	R		female	table tennis	LI Jie	R
	female	badminton	2013	2013-12-26	72	Tine BAUN	DEN	---	R		female	table tennis	LI Qian	R
	female	badminton	2013	2013-12-26	73	Maja TVRDY	SLO	---	R		female	table tennis	LI Qiangbing	R
	female	badminton	2013	2013-12-26	74	Shizuka Uchida	JPN	---	R		female	table tennis	LI Xiaodan	R
	female	badminton	2013	2013-12-26	75	Adrianti FIRDASARI	INA	---	R		female	table tennis	LI Xiaoxia	R
	female	badminton	2013	2013-12-26	76	Sarah WALKER	ENG	---	R		female	table tennis	LI Xue ^	R
	female	badminton	2013	2013-12-26	77	Jing Yi TEE	MAS	---	R		female	table tennis	LIN Ling	R
	female	badminton	2013	2013-12-26	78	Sandra-Maria JENSEN	DEN	---	R		female	table tennis	LIN Ye ^	R
	female	badminton	2013	2013-12-26	79	Fontaine Mica CHAPMAN	ENG	---	R		female	table tennis	LIU Gaoyang	L
	female	badminton	2013	2013-12-26	80	Anna Thea MADSEN	DEN	---	R		female	table tennis	LIU Jia	L
	female	badminton	2013	2013-12-26	81	Simone PRUTSCH	AUT	---	R		female	table tennis	LIU Shiwen	R
	female	badminton	2013	2013-12-26	82	Aiying XING	SIN	---	R		female	table tennis	LIU Xi	R
	female	badminton	2013	2013-12-26	83	Kana ITO	JPN	---	R		female	table tennis	LIU Xin	L
	female	badminton	2013	2013-12-26	84	Michelle CHAN KY	NZL	---	R		female	table tennis	LOVAS Petra	R
	female	badminton	2013	2013-12-26	85	P. C. Thulasi	IND	---	R		female	table tennis	MADARASZ Dora	R
	female	badminton	2013	2013-12-26	86	Anna RANKIN	NZL	---	R		female	table tennis	MAEDA Miyu	L
	female	badminton	2013	2013-12-26	87	Akane YAMAGUCHI	JPN	---	R		female	table tennis	MATSUDAIRA Shiho	R
	female	badminton	2013	2013-12-26	88	Olga KONON	GER	---	R		female	table tennis	MATSUZAWA Marina	R
	female	badminton	2013	2013-12-26	89	Christin TSAI	CAN	---	R		female	table tennis	MIKHAILOVA Polina	R
	female	badminton	2013	2013-12-26	90	Lianne TAN	BEL	---	R		female	table tennis	MITTELHAM Nina	R
	female	badminton	2013	2013-12-26	91	KIM Hyo Min	KOR	---	R		female	table tennis	MOLNAR Cornelia	R
	female	badminton	2013	2013-12-26	92	Charmaine REID	CAN	---	R		female	table tennis	MONTEIRO DODEAN Daniela	R
	female	badminton	2013	2013-12-26	93	CHANG Ya Lan	TPE	---	R		female	table tennis	MOON Hyunjung	R	MOON Hyun Jung
	female	badminton	2013	2013-12-26	94	Perrine LE BUHANIC	FRA	---	R		female	table tennis	MORI Sakura	R
	female	badminton	2013	2013-12-26	95	Sayaka SATO	JPN	---	L		female	table tennis	MORIZONO Misaki	R
	female	badminton	2013	2013-12-26	96	Hana RAMADHINI	INA	---	R		female	table tennis	MU Zi	R
	female	badminton	2013	2013-12-26	97	Rawinda PRAJONGJAI	THA	---	R		female	table tennis	NG Wing Nam	R
	female	badminton	2013	2013-12-26	98	Zuzana PAVELKOVA	CZE	---	R		female	table tennis	NI Xialian	L	NI Xia Lian
	female	badminton	2013	2013-12-26	99	Grace GABRIEL	NGR	---	R		female	table tennis	NONAKA Yuki	R
	female	badminton	2013	2013-12-26	100	Panuga RIOU	ENG	---	R		female	table tennis	NOSKOVA Yana	R
	female	badminton	2014	2014-12-24	1	LI Xuerui	CHN	---	R		female	table tennis	ODOROVA Eva	R
	female	badminton	2014	2014-12-24	2	WANG Shixian	CHN	---	R		female	table tennis	ONO Shiho	R
	female	badminton	2014	2014-12-24	3	WANG Yihan	CHN	---	R		female	table tennis	PAOVIC Sandra	R
	female	badminton	2014	2014-12-24	4	Saina NEHWAL	IND	---	R		female	table tennis	PARK Miyoung	R	PARK Mi Young
	female	badminton	2014	2014-12-24	5	SUNG Ji Hyun	KOR	---	R		female	table tennis	PARK Youngsook	L
	female	badminton	2014	2014-12-24	6	Ratchanok INTANON	THA	---	R		female	table tennis	PARTYKA Natalia	L
	female	badminton	2014	2014-12-24	7	TAI Tzu Ying	TPE	---	R		female	table tennis	PASKAUSKIENE Ruta	R
	female	badminton	2014	2014-12-24	8	Carolina MARIN	ESP	---	L		female	table tennis	PAVLOVICH Veronika	R
	female	badminton	2014	2014-12-24	9	BAE Yeon Ju	KOR	---	L		female	table tennis	PAVLOVICH Viktoria	R
	female	badminton	2014	2014-12-24	10	LIU Xin (F)	CHN	---	R		female	table tennis	PENG Luyang	R
	female	badminton	2014	2014-12-24	11	PUSARLA V. Sindhu	IND	---	R		female	table tennis	PESOTSKA Margaryta	R
	female	badminton	2014	2014-12-24	12	Akane YAMAGUCHI	JPN	---	R		female	table tennis	POLCANOVA Sofia	L
	female	badminton	2014	2014-12-24	13	Beiwen ZHANG	USA	---	R		female	table tennis	POSTOACA Camelia	R
	female	badminton	2014	2014-12-24	14	Michelle LI	CAN	---	R		female	table tennis	POTA Georgina	R
	female	badminton	2014	2014-12-24	15	Minatsu MITANI	JPN	---	R		female	table tennis	RAMIREZ Sara	R
	female	badminton	2014	2014-12-24	16	SUN Yu	CHN	---	R		female	table tennis	RAO Jingwen	R
	female	badminton	2014	2014-12-24	17	Sayaka TAKAHASHI	JPN	---	L		female	table tennis	RI Mi Gyong	L
	female	badminton	2014	2014-12-24	18	HAN Li	CHN	---	R		female	table tennis	RI Myong Sun	R
	female	badminton	2014	2014-12-24	19	Nitchaon JINDAPOL	THA	---	R		female	table tennis	SAMARA Elizabeta	L
	female	badminton	2014	2014-12-24	20	Eriko HIROSE	JPN	---	R		female	table tennis	SATO Hitomi	R
	female	badminton	2014	2014-12-24	21	Adrianti FIRDASARI	INA	---	R		female	table tennis	SCHALL Elke	R
	female	badminton	2014	2014-12-24	22	Busanan ONGBUMRUNGPHAN	THA	---	R		female	table tennis	SEO Hyowon	R	SEO Hyo Won
	female	badminton	2014	2014-12-24	23	Beatriz CORRALES	ESP	---	R		female	table tennis	SEOK Hajung	R	SEOK Ha Jung
	female	badminton	2014	2014-12-24	24	YAO Xue	CHN	---	R		female	table tennis	SHAN Xiaona ^	R
	female	badminton	2014	2014-12-24	25	Nozomi OKUHARA	JPN	---	R		female	table tennis	SHEN Yanfei	L
	female	badminton	2014	2014-12-24	26	Porntip BURANAPRASERTSUK	THA	---	R		female	table tennis	SHENG Dandan	R
	female	badminton	2014	2014-12-24	27	Kirsty GILMOUR	SCO	---	R		female	table tennis	SILBEREISEN Kristin	R
	female	badminton	2014	2014-12-24	28	HSU Ya Ching	TPE	---	R		female	table tennis	SKOV Mie	R
	female	badminton	2014	2014-12-24	29	Jing Yi TEE	MAS	---	R		female	table tennis	SOLJA Amelie ^	R
	female	badminton	2014	2014-12-24	30	Lindaweni FANETRI	INA	---	R		female	table tennis	SOLJA Petrissa	L
	female	badminton	2014	2014-12-24	31	Sayaka SATO	JPN	---	L		female	table tennis	SONG Maeum	R
	female	badminton	2014	2014-12-24	32	YIP Pui Yin	HKG	---	R		female	table tennis	SOROCHYNSKA Tetyana	R
	female	badminton	2014	2014-12-24	33	Bellaetrix MANUPUTTY	INA	---	R		female	table tennis	STEFANOVA Nikoleta	L
	female	badminton	2014	2014-12-24	34	PAI Yu Po	TPE	---	R		female	table tennis	STRBIKOVA Renata	R
	female	badminton	2014	2014-12-24	35	Karin SCHNAASE	GER	---	R		female	table tennis	SUN Beibei	R
	female	badminton	2014	2014-12-24	36	Line KJAERSFELDT	DEN	---	R		female	table tennis	SUN Jin	L
	female	badminton	2014	2014-12-24	37	PAI Hsiao Ma	TPE	---	R		female	table tennis	SUN Yingsha	R
	female	badminton	2014	2014-12-24	38	Linda ZETCHIRI	BUL	---	L		female	table tennis	SZOCS Bernadette	R
	female	badminton	2014	2014-12-24	39	Kaori IMABEPPU	JPN	---	R		female	table tennis	TAN Wenling	R
	female	badminton	2014	2014-12-24	40	P. C. Thulasi	IND	---	R		female	table tennis	TANG Liying	R
	female	badminton	2014	2014-12-24	41	Chloe MAGEE	IRL	---	R		female	table tennis	TANIOKA Ayuka	R
	female	badminton	2014	2014-12-24	42	Anna Thea MADSEN	DEN	---	R		female	table tennis	TASEI Mikie	R
	female	badminton	2014	2014-12-24	43	Sashina VIGNES WARAN	FRA	---	R		female	table tennis	TASHIRO Saki	R
	female	badminton	2014	2014-12-24	44	Maria Febe KUSUMASTUTI	INA	---	R		female	table tennis	TIAN Yuan	R
	female	badminton	2014	2014-12-24	45	Iris WANG	USA	---	R		female	table tennis	TIE Yana	R
	female	badminton	2014	2014-12-24	46	Petya NEDELCHEVA	BUL	---	R		female	table tennis	TIKHOMIROVA Anna	R
	female	badminton	2014	2014-12-24	47	Natalia PERMINOVA	RUS	---	R		female	table tennis	TIMINA Elena	R
	female	badminton	2014	2014-12-24	48	Sabrina JAQUET	SUI	---	R		female	table tennis	TOTH Krisztina	L
	female	badminton	2014	2014-12-24	49	Stefani STOEVA	BUL	---	R		female	table tennis	VACENOVSKA Iveta	R
	female	badminton	2014	2014-12-24	50	Thi Trang (B) VU	VIE	---	R		female	table tennis	WAKAMIYA Misako	L
	female	badminton	2014	2014-12-24	51	Jamie SUBANDHI	USA	---	R		female	table tennis	WANG Chen	R
	female	badminton	2014	2014-12-24	52	Jiayuan CHEN	SIN	---	R		female	table tennis	WANG Manyu	R
	female	badminton	2014	2014-12-24	53	Kristina GAVNHOLT	CZE	---	R		female	table tennis	WANG Nan	L
	female	badminton	2014	2014-12-24	54	Ksenia POLIKARPOVA	RUS	---	R		female	table tennis	WANG Xuan	R
	female	badminton	2014	2014-12-24	55	Kana ITO	JPN	---	R		female	table tennis	WANG Yuegu	R
	female	badminton	2014	2014-12-24	56	CHENG Chi Ya	TPE	---	R		female	table tennis	WEN Jia	L
	female	badminton	2014	2014-12-24	57	Rong SCHAFER	USA	---	R		female	table tennis	WINTER Sabine	R
	female	badminton	2014	2014-12-24	58	Li Lian YANG	MAS	---	R		female	table tennis	WU Jiaduo	R
	female	badminton	2014	2014-12-24	59	Ozge BAYRAK	TUR	---	R		female	table tennis	WU Xue	L
	female	badminton	2014	2014-12-24	60	Yui HASHIMOTO	JPN	---	R		female	table tennis	WU Yang	R
	female	badminton	2014	2014-12-24	61	Fabiana SILVA	BRA	---	R		female	table tennis	XIAN Yifang	R	XIAN Yi Fang
	female	badminton	2014	2014-12-24	62	Olga GOLOVANOVA	RUS	---	R		female	table tennis	XU Jie	R
	female	badminton	2014	2014-12-24	63	Jeanine CICOGNINI	ITA	---	R		female	table tennis	YAMANASHI Yuri	R
	female	badminton	2014	2014-12-24	64	Arundhati PANTAWANE	IND	---	R		female	table tennis	YANG Haeun	R
	female	badminton	2014	2014-12-24	65	Millicent WIRANTO	INA	---	R		female	table tennis	YANG Xiaoxin ^^	R
	female	badminton	2014	2014-12-24	66	Neslihan YIGIT	TUR	---	R		female	table tennis	YANG Yang	R
	female	badminton	2014	2014-12-24	67	Tanvi LAD	IND	---	R		female	table tennis	YAO Yan	R
	female	badminton	2014	2014-12-24	68	Saili RANE	IND	---	R		female	table tennis	YI Fangxian ^^	R
	female	badminton	2014	2014-12-24	69	Sannatasah SANIRU	MAS	---	R		female	table tennis	YOO Eunchong	R
	female	badminton	2014	2014-12-24	70	Fontaine Mica CHAPMAN	ENG	---	R		female	table tennis	YOON Sunae	R
	female	badminton	2014	2014-12-24	71	Aprillia YUSWANDARI	INA	---	R		female	table tennis	YU Fu ^	R
	female	badminton	2014	2014-12-24	72	Delphine LANSAC	FRA	---	R		female	table tennis	YU Mengyu	R
	female	badminton	2014	2014-12-24	73	CHEUNG Ngan Yi	HKG	---	R		female	table tennis	ZHANG Lily	R
	female	badminton	2014	2014-12-24	74	Maria ULITINA	UKR	---	R		female	table tennis	ZHANG Qiang	R
	female	badminton	2014	2014-12-24	75	Lohaynny VICENTE	BRA	---	R		female	table tennis	ZHANG Rui	R
	female	badminton	2014	2014-12-24	76	Evgeniya KOSETSKAYA	RUS	---	R		female	table tennis	ZHANG Yining	R
	female	badminton	2014	2014-12-24	77	Lyddia Yi Yu CHEAH	MAS	---	R		female	table tennis	ZHAO Yan	R
	female	badminton	2014	2014-12-24	78	Sandra-Maria JENSEN	DEN	---	R		female	table tennis	ZHENG Jiaqi ^	R
	female	badminton	2014	2014-12-24	79	KIM Hyo Min	KOR	---	R		female	table tennis	ZHOU Yihan ^	R
	female	badminton	2014	2014-12-24	80	Grace GABRIEL	NGR	---	R		female	table tennis	ZHU Chaohui	L
	female	badminton	2014	2014-12-24	81	Rachel HONDERICH	CAN	---	R		female	table tennis	ZHU Fang	R
	female	badminton	2014	2014-12-24	82	Aya OHORI	JPN	---	L		female	table tennis	ZHU Yuling	R
	female	badminton	2014	2014-12-24	83	Soraya DE VISCH EIJBERGEN	NED	---	R		female	tennis	Agnes Szavay	R
	female	badminton	2014	2014-12-24	84	Daniela MACIAS	PER	---	R		female	tennis	Agnieszka Radwanska	R
	female	badminton	2014	2014-12-24	85	Ayumi MINE	JPN	---	R		female	tennis	Ajla Tomljanovic	R
	female	badminton	2014	2014-12-24	86	Zuzana PAVELKOVA	CZE	---	R		female	tennis	Akgul Amanmuradova	R
	female	badminton	2014	2014-12-24	87	Elisabeth BALDAUF	AUT	---	R		female	tennis	Alberta Brianti	R
	female	badminton	2014	2014-12-24	88	Akvile STAPUSAITYTE	LTU	---	R		female	tennis	Aleksandra Krunic	R
	female	badminton	2014	2014-12-24	89	Kate FOO KUNE	MRI	---	L		female	tennis	Aleksandra Wozniak	R
	female	badminton	2014	2014-12-24	90	Anna RANKIN	NZL	---	R		female	tennis	Alexandra Cadantu	R
	female	badminton	2014	2014-12-24	91	Danica NISHIMURA	PER	---	R		female	tennis	Alexandra Dulgheru	R
	female	badminton	2014	2014-12-24	92	Lianne TAN	BEL	---	R		female	tennis	Alexandra Panova	R
	female	badminton	2014	2014-12-24	93	Hana RAMADHINI	INA	---	R		female	tennis	Alisa Kleybanova	R
	female	badminton	2014	2014-12-24	94	HUNG Shih Han	TPE	---	R		female	tennis	Alison Riske	R
	female	badminton	2014	2014-12-24	95	Kati TOLMOFF	EST	---	R		female	tennis	Alize Cornet	R
	female	badminton	2014	2014-12-24	96	Luz Maria ZORNOZA	PER	---	R		female	tennis	Alla Kudryavtseva	R
	female	badminton	2014	2014-12-24	97	Anna NAREL	POL	---	R		female	tennis	Alona Bondarenko	R
	female	badminton	2014	2014-12-24	98	Mette POULSEN	DEN	---	L		female	tennis	Amelie Mauresmo	R
	female	badminton	2014	2014-12-24	99	Shizuka Uchida	JPN	---	R		female	tennis	Ana Ivanovic	R
	female	badminton	2014	2014-12-24	100	Mariana UGALDE	MEX	---	L		female	tennis	Ana Konjuh	R
	female	squash	2009	Dec 2009	1	Nicol David	MAS		R		female	tennis	Anabel Medina Garrigues	R
	female	squash	2009	Dec 2009	2	Jenny Duncalf	ENG		R		female	tennis	Anastasia Pavlyuchenkova	R
	female	squash	2009	Dec 2009	3	Natalie Grinham	NED		R		female	tennis	Anastasia Rodionova	R
	female	squash	2009	Dec 2009	4	Rachael Grinham	AUS		R		female	tennis	Anastasija Sevastova	R
	female	squash	2009	Dec 2009	5	Natalie Grainger	USA		R		female	tennis	Anastasiya Yakimova	R
	female	squash	2009	Dec 2009	6	Alison Waters	ENG		R		female	tennis	Andrea Hlavackova	R
	female	squash	2009	Dec 2009	7	Omneya Abdel Kawy	EGY		R		female	tennis	Andrea Petkovic	R
	female	squash	2009	Dec 2009	8	Madeline Perry	IRL		R		female	tennis	Angelique Kerber	L
	female	squash	2009	Dec 2009	9	Laura Massaro	ENG		R		female	tennis	Anna Chakvetadze	R
	female	squash	2009	Dec 2009	10	Vanessa Atkinson	NED		R		female	tennis	Anna Karolina Schmiedlova	R
	female	squash	2009	Dec 2009	11	Kasey Brown	AUS		R		female	tennis	Anna Tatishvili	R
	female	squash	2009	Dec 2009	12	Shelley Kitchen	NZL		R		female	tennis	Anna-Lena Friedsam	R
	female	squash	2009	Dec 2009	13	Camille Serme	FRA		R		female	tennis	Anna-Lena Groenefeld	R
	female	squash	2009	Dec 2009	14	Engy Kheirallah	EGY		R		female	tennis	Anne Keothavong	R
	female	squash	2009	Dec 2009	15	Samantha Teran	MEX		R		female	tennis	Annika Beck	R
	female	squash	2009	Dec 2009	16	Annie Au	HKG		L		female	tennis	Arantxa Parra Santonja	R
	female	squash	2009	Dec 2009	17	Jaclyn Hawkes	NZL		R		female	tennis	Arantxa Rus	L
	female	squash	2009	Dec 2009	18	Tania Bailey	ENG		R		female	tennis	Aravane Rezai	R
	female	squash	2009	Dec 2009	19	Isabelle Stoehr	FRA		R		female	tennis	Ayumi Morita	R
	female	squash	2009	Dec 2009	20	Rebecca Chiu	HKG		R		female	tennis	Barbora Zahlavova Strycova	R	Barbora Strycova
	female	squash	2009	Dec 2009	21	Raneem El Welily	EGY		R		female	tennis	Belinda Bencic	R
	female	squash	2009	Dec 2009	22	Donna Urquhart	AUS		L		female	tennis	Bethanie Mattek-Sands	R
	female	squash	2009	Dec 2009	23	Lauren Briggs	ENG		R		female	tennis	Bojana Jovanovski	R
	female	squash	2009	Dec 2009	24	Dominique Lloyd-Walter	ENG		R		female	tennis	Camila Giorgi	R
	female	squash	2009	Dec 2009	25	Latasha Khan	USA		R		female	tennis	Carla Suarez Navarro	R
	female	squash	2009	Dec 2009	26	Delia Arnold	MAS		R		female	tennis	Caroline Garcia	R
	female	squash	2009	Dec 2009	27	Sarah Campion	ENG		R		female	tennis	Caroline Wozniacki	R
	female	squash	2009	Dec 2009	28	Aisling Blake	IRL		R		female	tennis	Casey Dellacqua	L
	female	squash	2009	Dec 2009	29	Line Hansen	DEN		R		female	tennis	Chanelle Scheepers	R
	female	squash	2009	Dec 2009	30	Sharon Wee	MAS		R		female	tennis	Christina Mchale	R
	female	squash	2009	Dec 2009	31	Joelle King	NZL		R		female	tennis	Coco Vandeweghe	R
	female	squash	2009	Dec 2009	32	Emma Beddoes	ENG		R		female	tennis	Daniela Hantuchova	R
	female	squash	2009	Dec 2009	33	Joshna Chinappa	IND		R		female	tennis	Dinah Pfizenmaier	R
	female	squash	2009	Dec 2009	34	Joey Chan	HKG		L		female	tennis	Dinara Safina	R
	female	squash	2009	Dec 2009	35	Suzie Pierrepont	ENG		R		female	tennis	Dominika Cibulkova	R
	female	squash	2009	Dec 2009	36	Low Wee Wern	MAS		R		female	tennis	Donna Vekic	R
	female	squash	2009	Dec 2009	37	Orla Noom	NED		L		female	tennis	Edina Gallovits	R
	female	squash	2009	Dec 2009	38	Lisa Camilleri	AUS		R		female	tennis	Ekaterina Makarova	L
	female	squash	2009	Dec 2009	39	Lauren Siddall	ENG		R		female	tennis	Elena Baltacha	R
	female	squash	2009	Dec 2009	40	Alana Miller	CAN		R		female	tennis	Elena Dementieva	R
	female	squash	2009	Dec 2009	41	Annelize Naude	NED		R		female	tennis	Elena Vesnina	R
	female	squash	2009	Dec 2009	42	Nour El Tayeb	EGY		R		female	tennis	Eleni Daniilidou	R
	female	squash	2009	Dec 2009	43	Fiona Moverley	ENG		R		female	tennis	Elina Svitolina	R
	female	squash	2009	Dec 2009	44	Song Sun-Mi	KOR		R		female	tennis	Eugenie Bouchard	R
	female	squash	2009	Dec 2009	45	Manuela Manetta	ITA		R		female	tennis	Evgeniya Rodina	R
	female	squash	2009	Dec 2009	46	Dipika Pallikal	IND		R		female	tennis	Flavia Pennetta	R
	female	squash	2009	Dec 2009	47	Nour El Sherbini	EGY		R		female	tennis	Francesca Schiavone	R
	female	squash	2009	Dec 2009	48	Siti Munirah Jusoh	MAS		R		female	tennis	Galina Voskoboeva	R
	female	squash	2009	Dec 2009	49	Kanzy Emad El Defrawy	EGY		R		female	tennis	Garbiñe Muguruza	R
	female	squash	2009	Dec 2009	50	Kylie Lindsay	NZL		R		female	tennis	Gisela Dulko	R
	female	squash	2009	Dec 2009	51	Elise Ng	HKG		R		female	tennis	Greta Arn	R
	female	squash	2009	Dec 2009	52	Victoria Lust	ENG		R		female	tennis	Heather Watson	R
	female	squash	2009	Dec 2009	53	Amanda Sobhy	USA		L		female	tennis	Ioana Raluca Olaru	R
	female	squash	2009	Dec 2009	54	Miranda Ranieri	CAN		R		female	tennis	Irina Falconi	R
	female	squash	2009	Dec 2009	55	Deon Saffery	WAL		R		female	tennis	Irina-Camelia Begu	R
	female	squash	2009	Dec 2009	56	Lucie Fialova	CZE		L		female	tennis	Iryna Bremond	R
	female	squash	2009	Dec 2009	57	Olga Ertlova	CZE		R		female	tennis	Iveta Benesova	L	Iveta Melzer
	female	squash	2009	Dec 2009	58	Lim Yoke Wah	MAS		R		female	tennis	Jamie Hampton	R
	female	squash	2009	Dec 2009	59	Amelia Pittock	AUS		R		female	tennis	Jana Cepelova	R
	female	squash	2009	Dec 2009	60	Heba El Torky	EGY		R		female	tennis	Jarmila Wolfe	R	Jarmila Groth; Jarmila Gajdosova
	female	squash	2009	Dec 2009	61	Celia Allamargot	FRA		R		female	tennis	Jelena Dokic	R
	female	squash	2009	Dec 2009	62	Melody Francis	AUS		R		female	tennis	Jelena Jankovic	R
	female	squash	2009	Dec 2009	63	Anna-Carin Forstadius	SWE		R		female	tennis	Jie Zheng	R
	female	squash	2009	Dec 2009	64	Laura Hill	ENG		R		female	tennis	Jill Craybas	R
	female	squash	2009	Dec 2009	65	Lotte Eriksen	NOR		R		female	tennis	Johanna Larsson	R
	female	squash	2009	Dec 2009	66	Alexandra Norman	CAN		R		female	tennis	Julia Glushko	R
	female	squash	2009	Dec 2009	67	Tenille van der Merwe	RSA		R		female	tennis	Julia Goerges	R
	female	squash	2009	Dec 2009	68	Birgit Coufal	AUT		R		female	tennis	Julie Coin	R
	female	squash	2009	Dec 2009	69	Christina Mak	HKG		R		female	tennis	Justine Henin	R
	female	squash	2009	Dec 2009	70	Irina Assal	RUS		R		female	tennis	Kaia Kanepi	R
	female	squash	2009	Dec 2009	71	Chinatsu Matsui	JPN		L		female	tennis	Kai-Chen Chang	R
	female	squash	2009	Dec 2009	72	Amanda Cranston	NZL		R		female	tennis	Karin Knapp	R
	female	squash	2009	Dec 2009	73	Adel Weir	RSA		R		female	tennis	Karolina Pliskova	R
	female	squash	2009	Dec 2009	74	Linda Hruzikova	SVK		R		female	tennis	Karolina Sprem	R
	female	squash	2009	Dec 2009	75	Lauren Selby	ENG		R		female	tennis	Katerina Siniakova	R
	female	squash	2009	Dec 2009	76	Maud Duplomb	FRA		R		female	tennis	Kateryna Bondarenko	R
	female	squash	2009	Dec 2009	77	Nouran El Torky	EGY		R		female	tennis	Katie O'Brien	R
	female	squash	2009	Dec 2009	78	Pushppa Devi	MAS		N/A		female	tennis	Kiki Bertens	R
	female	squash	2009	Dec 2009	79	Olivia Blatchford	USA		R		female	tennis	Kim Clijsters	R
	female	squash	2009	Dec 2009	80	Pamela Chua	SIN		R		female	tennis	Kimiko Date-Krumm	R	Kimiko Date Krumm
	female	squash	2009	Dec 2009	81	Misaki Kobayashi	JPN		R		female	tennis	Kirsten Flipkens	R
	female	squash	2009	Dec 2009	82	Zoe Petrovansky	AUS		R		female	tennis	Klara Koukalova	R
	female	squash	2009	Dec 2009	83	Josefa Bertilsson	SWE		R		female	tennis	Klara Zakopalova	R
	female	squash	2009	Dec 2009	84	Sara El Noamany	EGY		R		female	tennis	Kristina Barrois	R
	female	squash	2009	Dec 2009	85	Carolyn Russell	CAN		N/A		female	tennis	Kristina Mladenovic	R
	female	squash	2009	Dec 2009	86	Tara Mullins	CAN		R		female	tennis	Ksenia Pervak	L
	female	squash	2009	Dec 2009	87	Coline Aumard	FRA		R		female	tennis	Kurumi Nara	R
	female	squash	2009	Dec 2009	88	Nicolette Fernandes	GUY		R		female	tennis	Lara Arruabarrena	R
	female	squash	2009	Dec 2009	89	Jenna Gates	ENG		N/A		female	tennis	Laura Pous-Tio	R
	female	squash	2009	Dec 2009	90	Laura Pomportes	FRA		R		female	tennis	Laura Robson	L
	female	squash	2009	Dec 2009	91	Tan Yan Xin	MAS		R		female	tennis	Lauren Davis	R
	female	squash	2009	Dec 2009	92	Maria Toorpakai Wazir	PAK		R		female	tennis	Lesia Tsurenko	R
	female	squash	2009	Dec 2009	93	Stephanie Edmison	CAN		R		female	tennis	Lourdes Dominguez Lino	R
	female	squash	2009	Dec 2009	94	Leonie Holt	ENG		R		female	tennis	Lucie Hradecka	R
	female	squash	2009	Dec 2009	95	Milou van der Heijden	NED		R		female	tennis	Lucie Safarova	L
	female	squash	2009	Dec 2009	96	Zulhijjah Binti Azan	MAS		R		female	tennis	Luksika Kumkhum	R
	female	squash	2009	Dec 2009	97	Low Wee Nee	MAS		N/A		female	tennis	Madison Brengle	R
	female	squash	2009	Dec 2009	98	Runa Reta	CAN		R		female	tennis	Madison Keys	R
	female	squash	2009	Dec 2009	99	Emma Chorley	ENG		N/A		female	tennis	Magdalena Rybarikova	R
	female	squash	2009	Dec 2009	100	Sarah Cardwell	AUS		R		female	tennis	Mandy Minella	R
	female	squash	2010	Dec 2010	1	Nicol David	MAS		R		female	tennis	Maria Jose Martinez Sanchez	L
	female	squash	2010	Dec 2010	2	Jenny Duncalf	ENG		R		female	tennis	Maria Kirilenko	R
	female	squash	2010	Dec 2010	3	Alison Waters	ENG		R		female	tennis	Maria Sharapova	R
	female	squash	2010	Dec 2010	4	Omneya Abdel Kawy	EGY		R		female	tennis	María-Teresa Torró-Flor	R
	female	squash	2010	Dec 2010	5	Rachael Grinham	AUS		R		female	tennis	Marina Erakovic	R
	female	squash	2010	Dec 2010	6	Madeline Perry	IRL		R		female	tennis	Marion Bartoli	R
	female	squash	2010	Dec 2010	7	Kasey Brown	AUS		R		female	tennis	Mathilde Johansson	R
	female	squash	2010	Dec 2010	8	Vanessa Atkinson	NED		R		female	tennis	Melanie Oudin	R
	female	squash	2010	Dec 2010	9	Laura Massaro	ENG		R		female	tennis	Melinda Czink	L
	female	squash	2010	Dec 2010	10	Camille Serme	FRA		R		female	tennis	Mirjana Lucic-Baroni	R
	female	squash	2010	Dec 2010	11	Raneem El Welily	EGY		R		female	tennis	Misaki Doi	L
	female	squash	2010	Dec 2010	12	Jaclyn Hawkes	NZL		R		female	tennis	Mona Barthel	R
	female	squash	2010	Dec 2010	13	Samantha Teran	MEX		R		female	tennis	Monica Niculescu	R
	female	squash	2010	Dec 2010	14	Annie Au	HKG		L		female	tennis	Monica Puig	R
	female	squash	2010	Dec 2010	15	Low Wee Wern	MAS		R		female	tennis	Na Li	R
	female	squash	2010	Dec 2010	16	Donna Urquhart	AUS		L		female	tennis	Nadia Petrova	R
	female	squash	2010	Dec 2010	17	Joelle King	NZL		R		female	tennis	Nicole Gibbs	R
	female	squash	2010	Dec 2010	18	Isabelle Stoehr	FRA		R		female	tennis	Nina Bratchikova	R
	female	squash	2010	Dec 2010	19	Nour El Tayeb	EGY		R		female	tennis	Olga Govortsova	R
	female	squash	2010	Dec 2010	20	Engy Kheirallah	EGY		R		female	tennis	Patricia Mayr-Achleitner	R	Patricia Mayr
	female	squash	2010	Dec 2010	21	Rebecca Chiu	HKG		R		female	tennis	Patty Schnyder	L
	female	squash	2010	Dec 2010	22	Delia Arnold	MAS		R		female	tennis	Paula Ormaechea	R
	female	squash	2010	Dec 2010	23	Sarah Campion	ENG		R		female	tennis	Pauline Parmentier	R
	female	squash	2010	Dec 2010	24	Aisling Blake	IRL		R		female	tennis	Petra Cetkovska	R
	female	squash	2010	Dec 2010	25	Emma Beddoes	ENG		R		female	tennis	Petra Kvitova	L
	female	squash	2010	Dec 2010	26	Amanda Sobhy	USA		L		female	tennis	Petra Martic	R
	female	squash	2010	Dec 2010	27	Nour El Sherbini	EGY		R		female	tennis	Polona Hercog	R
	female	squash	2010	Dec 2010	28	Line Hansen	DEN		R		female	tennis	Rebecca Marino	R
	female	squash	2010	Dec 2010	29	Dipika Pallikal	IND		R		female	tennis	Regina Kulikova	R
	female	squash	2010	Dec 2010	30	Latasha Khan	USA		R		female	tennis	Renata Voracova	R
	female	squash	2010	Dec 2010	31	Joey Chan	HKG		L		female	tennis	Roberta Vinci	R
	female	squash	2010	Dec 2010	32	Manuela Manetta	ITA		R		female	tennis	Romina Oprandi	R
	female	squash	2010	Dec 2010	33	Lisa Camilleri	AUS		R		female	tennis	Sabine Lisicki	R
	female	squash	2010	Dec 2010	34	Natalie Grainger	USA		R		female	tennis	Saisai Zheng	R
	female	squash	2010	Dec 2010	35	Tania Bailey	ENG		R		female	tennis	Samantha Stosur	R
	female	squash	2010	Dec 2010	36	Joshna Chinappa	IND		R		female	tennis	Sandra Zahlavova	R
	female	squash	2010	Dec 2010	37	Olivia Blatchford	USA		R		female	tennis	Sania Mirza	R
	female	squash	2010	Dec 2010	38	Orla Noom	NED		L		female	tennis	Sara Errani	R
	female	squash	2010	Dec 2010	39	Annelize Naude	NED		R		female	tennis	Serena Williams	R
	female	squash	2010	Dec 2010	40	Kanzy Emad El Defrawy	EGY		R		female	tennis	Shahar Peer	R
	female	squash	2010	Dec 2010	41	Victoria Lust	ENG		R		female	tennis	Shelby Rogers	R
	female	squash	2010	Dec 2010	42	Kylie Lindsay	NZL		R		female	tennis	Shuai Peng	R
	female	squash	2010	Dec 2010	43	Heba El Torky	EGY		R		female	tennis	Shuai Zhang	R
	female	squash	2010	Dec 2010	44	Sharon Wee	MAS		R		female	tennis	Silvia Soler-Espinosa	R
	female	squash	2010	Dec 2010	45	Dominique Lloyd-Walter	ENG		R		female	tennis	Simona Halep	R
	female	squash	2010	Dec 2010	46	Nicolette Fernandes	GUY		R		female	tennis	Sloane Stephens	R
	female	squash	2010	Dec 2010	47	Song Sun-Mi	KOR		R		female	tennis	Sofia Arvidsson	R
	female	squash	2010	Dec 2010	48	Miranda Ranieri	CAN		R		female	tennis	Sorana Cirstea	R
	female	squash	2010	Dec 2010	49	Natalie Grinham	NED		R		female	tennis	Stefanie Voegele	R
	female	squash	2010	Dec 2010	50	Siti Munirah Jusoh	MAS		R		female	tennis	Stephanie Dubois	R
	female	squash	2010	Dec 2010	51	Alexandra Norman	CAN		R		female	tennis	Su-Wei Hsieh	R
	female	squash	2010	Dec 2010	52	Tenille van der Merwe	RSA		R		female	tennis	Svetlana Kuznetsova	R
	female	squash	2010	Dec 2010	53	Misaki Kobayashi	JPN		R		female	tennis	Sybille Bammer	L
	female	squash	2010	Dec 2010	54	Lucie Fialova	CZE		L		female	tennis	Tamarine Tanasugarn	R
	female	squash	2010	Dec 2010	55	Lauren Selby	ENG		R		female	tennis	Tamira Paszek	R
	female	squash	2010	Dec 2010	56	Alana Miller	CAN		R		female	tennis	Tathiana Garbin	R
	female	squash	2010	Dec 2010	57	Amelia Pittock	AUS		R		female	tennis	Tatjana Malek	R
	female	squash	2010	Dec 2010	58	Elise Ng	HKG		R		female	tennis	Teliana Pereira	R
	female	squash	2010	Dec 2010	59	Gaby Huber	SUI		R		female	tennis	Tereza Smitkova	R
	female	squash	2010	Dec 2010	60	Melody Francis	AUS		R		female	tennis	Timea Babos	R
	female	squash	2010	Dec 2010	61	Lauren Siddall	ENG		R		female	tennis	Timea Bacsinszky	R
	female	squash	2010	Dec 2010	62	Olga Ertlova	CZE		R		female	tennis	Tsvetana Pironkova	R
	female	squash	2010	Dec 2010	63	Adel Weir	RSA		R		female	tennis	Urszula Radwanska	R
	female	squash	2010	Dec 2010	64	Sarah Cardwell	AUS		R		female	tennis	Vania King	R
	female	squash	2010	Dec 2010	65	Milou van der Heijden	NED		R		female	tennis	Varvara Lepchenko	L
	female	squash	2010	Dec 2010	66	Coline Aumard	FRA		R		female	tennis	Venus Williams	R
	female	squash	2010	Dec 2010	67	Farah Abdel Meguid	EGY		R		female	tennis	Vera Dushevina	R
	female	squash	2010	Dec 2010	68	Suzie Pierrepont	ENG		R		female	tennis	Vera Zvonareva	R
	female	squash	2010	Dec 2010	69	Zoe Petrovansky	AUS		R		female	tennis	Victoria Azarenka	R
	female	squash	2010	Dec 2010	70	Carmen Lee	HKG		R		female	tennis	Viktoriya Kutuzova	R
	female	squash	2010	Dec 2010	71	Ivonne Diaz	MEX		R		female	tennis	Virginie Razzano	R
	female	squash	2010	Dec 2010	72	Birgit Coufal	AUT		R		female	tennis	Vitalia Diatchenko	R
	female	squash	2010	Dec 2010	73	Samantha Foyle	AUS		R		female	tennis	Yanina Wickmayer	R
	female	squash	2010	Dec 2010	74	Leonie Holt	ENG		R		female	tennis	Yaroslava Shvedova	R
	female	squash	2010	Dec 2010	75	Siyoli Waters	RSA		R		female	tennis	Yung-Jan Chan	R
	female	squash	2010	Dec 2010	76	Thaisa Serafini	BRA		R		female	tennis	Yvonne Meusburger	R
	female	squash	2010	Dec 2010	77	Linda Hruzikova	SVK		R		female	tennis	Zarina Diyas	R
	female	squash	2010	Dec 2010	78	Laura Pomportes	FRA		R		female	tennis	Zuzana Ondraskova	R
	female	squash	2010	Dec 2010	79	Maud Duplomb	FRA		R		male	badminton	Aditya Elango Abdul Raheem	R
	female	squash	2010	Dec 2010	80	Lauren Briggs	ENG		R		male	badminton	Adrian Dziolko	R
	female	squash	2010	Dec 2010	81	Emily Whitlock	ENG		R		male	badminton	Ajay Jayaram	R
	female	squash	2010	Dec 2010	82	Tong Tsz-Wing	HKG		R		male	badminton	Alamsyah Yunus	R
	female	squash	2010	Dec 2010	83	Amanda Cranston	NZL		R		male	badminton	Ali Shahhosseini	R
	female	squash	2010	Dec 2010	84	Sina Wall	GER		R		male	badminton	Alistair Casey	R
	female	squash	2010	Dec 2010	85	Nayelly Hernandez	MEX		R		male	badminton	Anand Pawar	R
	female	squash	2010	Dec 2010	86	Stephanie Edmison	CAN		R		male	badminton	Andre Kurniawan Tedjono	R
	female	squash	2010	Dec 2010	87	Samantha Cornett	CAN		R		male	badminton	Andrew Smith	R
	female	squash	2010	Dec 2010	88	Liu Tsz-Ling	HKG		R		male	badminton	Anup Sridhar	R
	female	squash	2010	Dec 2010	89	Fiona Moverley	ENG		R		male	badminton	Arvind Bhat	R
	female	squash	2010	Dec 2010	90	Chinatsu Matsui	JPN		L		male	badminton	Ben Beckman	L
	female	squash	2010	Dec 2010	91	Nouran El Torky	EGY		R		male	badminton	Beng Hong Kuan	R
	female	squash	2010	Dec 2010	92	Maggy Marshall	AUS		N/A		male	badminton	Beryno Wong	L
	female	squash	2010	Dec 2010	93	Karina Heredia Gonzalez	MEX		R		male	badminton	Bjorn Seguin	R
	female	squash	2010	Dec 2010	94	Tamika Saxby	AUS		R		male	badminton	Boonsak Ponsana	R
	female	squash	2010	Dec 2010	95	Carolyn Russell	CAN		N/A		male	badminton	Brice Leverdez	R
	female	squash	2010	Dec 2010	96	Imelda Salazar Martinez	MEX		R		male	badminton	Carl Baxter	R
	female	squash	2010	Dec 2010	97	Celia Allamargot	FRA		R		male	badminton	CHEN Yuekun	R
	female	squash	2010	Dec 2010	98	Laura Hill	ENG		R		male	badminton	Cheol Ho Lee	N/A
	female	squash	2010	Dec 2010	99	Pamela Chua	SIN		R		male	badminton	Chetan Anand	R
	female	squash	2010	Dec 2010	100	Anaka Alankamony	IND		R		male	badminton	Chia-Hsin Wan	R
	female	squash	2011	Dec 2011	1	Nicol David	MAS		R		male	badminton	Chong Wei Lee	R
	female	squash	2011	Dec 2011	2	Jenny Duncalf	ENG		R		male	badminton	Choong Hann Wong	L
	female	squash	2011	Dec 2011	3	Laura Massaro	ENG		R		male	badminton	Chou Tien Chen	R
	female	squash	2011	Dec 2011	4	Madeline Perry	IRL		R		male	badminton	Christian Lind Thomsen	R
	female	squash	2011	Dec 2011	5	Kasey Brown	AUS		R		male	badminton	Christie Jonatan	R
	female	squash	2011	Dec 2011	6	Rachael Grinham	AUS		R		male	badminton	Chun Hei Tam	R
	female	squash	2011	Dec 2011	7	Raneem El Welily	EGY		R		male	badminton	Chun Seang Tan	L
	female	squash	2011	Dec 2011	8	Annie Au	HKG		L		male	badminton	Chunlai Bao	L
	female	squash	2011	Dec 2011	9	Natalie Grinham	NED		R		male	badminton	Dan Lin	L
	female	squash	2011	Dec 2011	10	Camille Serme	FRA		R		male	badminton	Daniel Paiola	R
	female	squash	2011	Dec 2011	11	Low Wee Wern	MAS		R		male	badminton	Daren Liew	R
	female	squash	2011	Dec 2011	12	Joelle King	NZL		R		male	badminton	David Obernosterer	R
	female	squash	2011	Dec 2011	13	Samantha Teran	MEX		R		male	badminton	David Snider	R
	female	squash	2011	Dec 2011	14	Donna Urquhart	AUS		L		male	badminton	Dicky Palyama	R
	female	squash	2011	Dec 2011	15	Jaclyn Hawkes	NZL		R		male	badminton	Dieter Domke	R
	female	squash	2011	Dec 2011	16	Sarah Campion	ENG		R		male	badminton	Dinuka Karunaratna	R
	female	squash	2011	Dec 2011	17	Dipika Pallikal	IND		R		male	badminton	Dionysius Hayom Rumbaka	R
	female	squash	2011	Dec 2011	18	Omneya Abdel Kawy	EGY		R		male	badminton	Dmytro Zavadsky	R
	female	squash	2011	Dec 2011	19	Nour El Tayeb	EGY		R		male	badminton	Dong Keun Lee	R
	female	squash	2011	Dec 2011	20	Joey Chan	HKG		L		male	badminton	Edwin Ekiring	R
	female	squash	2011	Dec 2011	21	Delia Arnold	MAS		R		male	badminton	Eetu Heino	R
	female	squash	2011	Dec 2011	22	Emma Beddoes	ENG		R		male	badminton	Emil Holst	R
	female	squash	2011	Dec 2011	23	Line Hansen	DEN		R		male	badminton	Eric Pang	R
	female	squash	2011	Dec 2011	24	Amanda Sobhy	USA		L		male	badminton	Erik Meijs	R
	female	squash	2011	Dec 2011	25	Heba El Torky	EGY		R		male	badminton	Fikri Ihsandi Hadmadi	R
	female	squash	2011	Dec 2011	26	Aisling Blake	IRL		R		male	badminton	Flemming Quach	R
	female	squash	2011	Dec 2011	27	Latasha Khan	USA		R		male	badminton	Gabriel Ulldahl	R
	female	squash	2011	Dec 2011	28	Nour El Sherbini	EGY		R		male	badminton	Gurusai Datt R.M.V	R
	female	squash	2011	Dec 2011	29	Kanzy Emad El Defrawy	EGY		R		male	badminton	Hans-Kristian Vittinghus	R
	female	squash	2011	Dec 2011	30	Gaby Huber	SUI		R		male	badminton	Harry Wright	R
	female	squash	2011	Dec 2011	31	Victoria Lust	ENG		R		male	badminton	Henri Hurskainen	L
	female	squash	2011	Dec 2011	32	Yathreb Adel	EGY		R		male	badminton	Houwei Tian	L
	female	squash	2011	Dec 2011	33	Lauren Briggs	ENG		R		male	badminton	Howard Shu	R
	female	squash	2011	Dec 2011	34	Joshna Chinappa	IND		R		male	badminton	Hsuan Yi Hsueh	R
	female	squash	2011	Dec 2011	35	Emily Whitlock	ENG		R		male	badminton	Huan Gao	R
	female	squash	2011	Dec 2011	36	Melody Francis	AUS		R		male	badminton	Hyun Il Lee	L
	female	squash	2011	Dec 2011	37	Vanessa Atkinson	NED		R		male	badminton	Indra Bagus Ade Chandra	R
	female	squash	2011	Dec 2011	38	Siyoli Waters	RSA		R		male	badminton	Iskandar Zulkarnain Zainuddin	R
	female	squash	2011	Dec 2011	39	Misaki Kobayashi	JPN		R		male	badminton	Ivan Sozonov	L
	female	squash	2011	Dec 2011	40	Lucie Fialova	CZE		L		male	badminton	Iztok Utrosa	L
	female	squash	2011	Dec 2011	41	Sina Wall	GER		R		male	badminton	Jan Frohlich	R
	female	squash	2011	Dec 2011	42	Siti Munirah Jusoh	MAS		R		male	badminton	Jan O Jorgensen	R
	female	squash	2011	Dec 2011	43	Alison Waters	ENG		R		male	badminton	Jan Vondra	R
	female	squash	2011	Dec 2011	44	Samantha Cornett	CAN		R		male	badminton	Jang Young Soo	R
	female	squash	2011	Dec 2011	45	Lisa Camilleri	AUS		R		male	badminton	Jen Hao Hsu	R
	female	squash	2011	Dec 2011	46	Miranda Ranieri	CAN		R		male	badminton	Ji Hoon Hong	R
	female	squash	2011	Dec 2011	47	Lauren Selby	ENG		R		male	badminton	Jin Chen	R
	female	squash	2011	Dec 2011	48	Olga Ertlova	CZE		R		male	badminton	Joachim Persson	L
	female	squash	2011	Dec 2011	49	Nouran El Torky	EGY		R		male	badminton	Joe Wu	R
	female	squash	2011	Dec 2011	50	Kylie Lindsay	NZL		R		male	badminton	Ka Long Angus Ng	R
	female	squash	2011	Dec 2011	51	Olivia Blatchford	USA		R		male	badminton	Kai Wen	R
	female	squash	2011	Dec 2011	52	Tenille van der Merwe	RSA		R		male	badminton	Kashyap Parupalli	R
	female	squash	2011	Dec 2011	53	Eun Chan Ahn	KOR		R		male	badminton	Kasper Ipsen	R
	female	squash	2011	Dec 2011	54	Milou van der Heijden	NED		R		male	badminton	Kaveh Mehrabi	R
	female	squash	2011	Dec 2011	55	Lisa Aitken	ENG		L		male	badminton	Kazumasa Sakai	R
	female	squash	2011	Dec 2011	56	Coline Aumard	FRA		R		male	badminton	Kazushi Yamada	R
	female	squash	2011	Dec 2011	57	Amanda Landers-Murphy	NZL		L		male	badminton	Kazuteru Kozai	R
	female	squash	2011	Dec 2011	58	Manuela Manetta	ITA		R		male	badminton	Keigo Sonoda	R
	female	squash	2011	Dec 2011	59	Salma Hany	EGY		R		male	badminton	Kenichi Tago	R
	female	squash	2011	Dec 2011	60	Orla Noom	NED		L		male	badminton	Kento Momota	L
	female	squash	2011	Dec 2011	61	Nicolette Fernandes	GUY		R		male	badminton	Kestutis Navickas	R
	female	squash	2011	Dec 2011	62	Thaisa Serafini	BRA		R		male	badminton	Kevin Cordon	L
	female	squash	2011	Dec 2011	63	Alexandra Norman	CAN		R		male	badminton	Khosit Phetpradab	R
	female	squash	2011	Dec 2011	64	Sarah Cardwell	AUS		R		male	badminton	Kieran Merrilees	R
	female	squash	2011	Dec 2011	65	Tesni Evans	WAL		R		male	badminton	Koichi Saeki	R
	female	squash	2011	Dec 2011	66	Farah Abdel Meguid	EGY		R		male	badminton	Kristian Midtgaard	R
	female	squash	2011	Dec 2011	67	Birgit Coufal	AUT		R		male	badminton	Kuei Chun Shih	R
	female	squash	2011	Dec 2011	68	Liu Tsz-Ling	HKG		R		male	badminton	Kwong Beng Chan	R
	female	squash	2011	Dec 2011	69	Maud Duplomb	FRA		R		male	badminton	Long Chen	R
	female	squash	2011	Dec 2011	70	Merhan Amr Mahmoud	EGY		R		male	badminton	Lucas Claerbout	R
	female	squash	2011	Dec 2011	71	Dominique Lloyd-Walter	ENG		R		male	badminton	Lucas Corvee	R
	female	squash	2011	Dec 2011	72	Stephanie Edmison	CAN		R		male	badminton	Luka Wraber	R
	female	squash	2011	Dec 2011	73	Tamika Saxby	AUS		R		male	badminton	Lukas Schmidt	R
	female	squash	2011	Dec 2011	74	Maggy Marshall	AUS		N/A		male	badminton	Magnus Sahlberg	R
	female	squash	2011	Dec 2011	75	Nayelly Hernandez	MEX		R		male	badminton	Marc Zwiebler	L
	female	squash	2011	Dec 2011	76	Celia Allamargot	FRA		R		male	badminton	Marcel Reuter	L
	female	squash	2011	Dec 2011	77	Carmen Lee	HKG		R		male	badminton	Mathias Borg	R
	female	squash	2011	Dec 2011	78	Adel Weir	RSA		R		male	badminton	Matthieu Lo Ying Ping	L
	female	squash	2011	Dec 2011	79	Ivonne Diaz	MEX		R		male	badminton	Michael Lahnsteiner	R
	female	squash	2011	Dec 2011	80	Deon Saffery	WAL		R		male	badminton	Michal Matejka	R
	female	squash	2011	Dec 2011	81	Song Sun-Mi	KOR		R		male	badminton	Michal Rogalski	R
	female	squash	2011	Dec 2011	82	Kristen Lange	USA		R		male	badminton	Milan Ludik	R
	female	squash	2011	Dec 2011	83	Sarah-Jane Perry	ENG		R		male	badminton	Misbun Ramdan Mohmed Misbun	R
	female	squash	2011	Dec 2011	84	Megan Craig	NZL		R		male	badminton	Misha Zilberman	R
	female	squash	2011	Dec 2011	85	Aparajitha Balamurukan	IND		R		male	badminton	Mohamad Arif Abdul Latif	R
	female	squash	2011	Dec 2011	86	Christine Nunn	AUS		R		male	badminton	Muhammad Hafiz Hashim	R
	female	squash	2011	Dec 2011	87	Lotte Eriksen	NOR		R		male	badminton	Murat Sen	R
	female	squash	2011	Dec 2011	88	Anaka Alankamony	IND		R		male	badminton	Nan Wei	R
	female	squash	2011	Dec 2011	89	Elpiniki Clement	USA		L		male	badminton	Niluka Karunaratne	R
	female	squash	2011	Dec 2011	90	Vanessa Pickerd	AUS		N/A		male	badminton	Osleni Guerrero	R
	female	squash	2011	Dec 2011	91	Samantha Foyle	AUS		R		male	badminton	Pablo Abian	R
	female	squash	2011	Dec 2011	92	Tania Bailey	ENG		R		male	badminton	Pakkawat Vilailak	R
	female	squash	2011	Dec 2011	93	Pushppa Devi	MAS		N/A		male	badminton	Pedro Martins	R
	female	squash	2011	Dec 2011	94	Genevieve Lessard	CAN		N/A		male	badminton	Pengyu Du	R
	female	squash	2011	Dec 2011	95	Laura Pomportes	FRA		R		male	badminton	Peter Hoeg Gade	R
	female	squash	2011	Dec 2011	96	Carrie Ramsey	ENG		R		male	badminton	Peter Mikkelsen	R
	female	squash	2011	Dec 2011	97	Leonie Holt	ENG		R		male	badminton	Petr Koukal	R
	female	squash	2011	Dec 2011	98	Engy Kheirallah	EGY		R		male	badminton	Prannoy H. S.	R
	female	squash	2011	Dec 2011	99	Chloe Mesic	FRA		L		male	badminton	Przemyslaw Wacha	R
	female	squash	2011	Dec 2011	100	Zoe Petrovansky	AUS		R		male	badminton	Rajiv Ouseph	R
	female	squash	2012	Dec 2012	1	Nicol David	MAS		R		male	badminton	Rasmus Fladberg	R
	female	squash	2012	Dec 2012	2	Raneem El Welily	EGY		R		male	badminton	Raul Must	R
	female	squash	2012	Dec 2012	3	Laura Massaro	ENG		R		male	badminton	Riichi Takeshita	R
	female	squash	2012	Dec 2012	4	Alison Waters	ENG		R		male	badminton	Riyanto Subagja	R
	female	squash	2012	Dec 2012	5	Joelle King	NZL		R		male	badminton	Robin Gonansa	R
	female	squash	2012	Dec 2012	6	Nour El Sherbini	EGY		R		male	badminton	Rodrigo Pacheco Carrillo	R
	female	squash	2012	Dec 2012	7	Low Wee Wern	MAS		R		male	badminton	Rune Ulsing	R
	female	squash	2012	Dec 2012	8	Annie Au	HKG		L		male	badminton	Sa Rang Kim	R
	female	squash	2012	Dec 2012	9	Madeline Perry	IRL		R		male	badminton	Sai Praneeth B.	R
	female	squash	2012	Dec 2012	10	Dipika Pallikal	IND		R		male	badminton	Sairul Amar Ayob	R
	female	squash	2012	Dec 2012	11	Kasey Brown	AUS		R		male	badminton	Sattawat Pongnairat	R
	female	squash	2012	Dec 2012	12	Jenny Duncalf	ENG		R		male	badminton	Scott Evans	R
	female	squash	2012	Dec 2012	13	Camille Serme	FRA		R		male	badminton	Sho Sasaki	R
	female	squash	2012	Dec 2012	14	Natalie Grinham	NED		R		male	badminton	Shuhei Hayasaki	R
	female	squash	2012	Dec 2012	15	Donna Urquhart	AUS		L		male	badminton	Simon Maunoury	R
	female	squash	2012	Dec 2012	16	Rachael Grinham	AUS		R		male	badminton	Simon Santoso	R
	female	squash	2012	Dec 2012	17	Samantha Teran	MEX		R		male	badminton	Sony Dwi Kuncoro	R
	female	squash	2012	Dec 2012	18	Amanda Sobhy	USA		L		male	badminton	Soon Huat Goh	R
	female	squash	2012	Dec 2012	19	Jaclyn Hawkes	NZL		R		male	badminton	Sourabh Varma	R
	female	squash	2012	Dec 2012	20	Omneya Abdel Kawy	EGY		R		male	badminton	Srikanth K.	R
	female	squash	2012	Dec 2012	21	Joey Chan	HKG		L		male	badminton	Stanislav Pukhov	R
	female	squash	2012	Dec 2012	22	Sarah Campion	ENG		R		male	badminton	Stefan Wojcikiewicz	L
	female	squash	2012	Dec 2012	23	Aisling Blake	IRL		R		male	badminton	Subhankar Dey	R
	female	squash	2012	Dec 2012	24	Line Hansen	DEN		R		male	badminton	Sung Hwan Park	R
	female	squash	2012	Dec 2012	25	Nour El Tayeb	EGY		R		male	badminton	Sung Min Park	R
	female	squash	2012	Dec 2012	26	Latasha Khan	USA		R		male	badminton	Suppanyu Avihingsanon	R
	female	squash	2012	Dec 2012	27	Lauren Briggs	ENG		R		male	badminton	Sven Eric Kastens	R
	female	squash	2012	Dec 2012	28	Emily Whitlock	ENG		R		male	badminton	Takuma Ueda	R
	female	squash	2012	Dec 2012	29	Sarah-Jane Perry	ENG		R		male	badminton	Tanongsak Saensomboonsuk	L
	female	squash	2012	Dec 2012	30	Delia Arnold	MAS		R		male	badminton	Taufik Hidayat	R
	female	squash	2012	Dec 2012	31	Joshna Chinappa	IND		R		male	badminton	Thomas Rouxel	R
	female	squash	2012	Dec 2012	32	Samantha Cornett	CAN		R		male	badminton	Tien Minh Nguyen	R
	female	squash	2012	Dec 2012	33	Heba El Torky	EGY		R		male	badminton	Toby Penty	L
	female	squash	2012	Dec 2012	34	Lucie Fialova	CZE		L		male	badminton	Tommy Sugiarto	R
	female	squash	2012	Dec 2012	35	Emma Beddoes	ENG		R		male	badminton	Tsuen Seng Lee	L
	female	squash	2012	Dec 2012	36	Kylie Lindsay	NZL		R		male	badminton	Tzu Wei Wang	R
	female	squash	2012	Dec 2012	37	Siti Munirah Jusoh	MAS		R		male	badminton	Valeriy Atrashchenkov	R
	female	squash	2012	Dec 2012	38	Lisa Aitken	ENG		L		male	badminton	Viktor Axelsen	R
	female	squash	2012	Dec 2012	39	Amanda Landers-Murphy	NZL		L		male	badminton	Ville Lang	R
	female	squash	2012	Dec 2012	40	Liu Tsz-Ling	HKG		R		male	badminton	Vladimir Ivanov	R
	female	squash	2012	Dec 2012	41	Maria Toorpakai Wazir	PAK		R		male	badminton	Vladimir Malkov	R
	female	squash	2012	Dec 2012	42	Misaki Kobayashi	JPN		R		male	badminton	Wan Ho Son	R
	female	squash	2012	Dec 2012	43	Tesni Evans	WAL		R		male	badminton	Wee Chung Pei	R
	female	squash	2012	Dec 2012	44	Coline Aumard	FRA		R		male	badminton	Wei Feng Chong	L
	female	squash	2012	Dec 2012	45	Gaby Huber	SUI		R		male	badminton	Wei Ng	R
	female	squash	2012	Dec 2012	46	Siyoli Waters	RSA		R		male	badminton	Wei Sheng Loh	R
	female	squash	2012	Dec 2012	47	Lauren Selby	ENG		R		male	badminton	Weijie Gong	R
	female	squash	2012	Dec 2012	48	Nicolette Fernandes	GUY		R		male	badminton	Wenlong Zhou	R
	female	squash	2012	Dec 2012	49	Olga Ertlova	CZE		R		male	badminton	Wing Ki Vincent Wong	R
	female	squash	2012	Dec 2012	50	Miranda Ranieri	CAN		R		male	badminton	Wisnu Yuli Prasetyo	R
	female	squash	2012	Dec 2012	51	Sarah Cardwell	AUS		R		male	badminton	Xue Song	R
	female	squash	2012	Dec 2012	52	Kristen Lange	USA		R		male	badminton	Yan Kit Chan	R
	female	squash	2012	Dec 2012	53	Megan Craig	NZL		R		male	badminton	Yogendran Krishnan	R
	female	squash	2012	Dec 2012	54	Victoria Lust	ENG		R		male	badminton	Yong Zhao Ashton Chen	R
	female	squash	2012	Dec 2012	55	Deon Saffery	WAL		R		male	badminton	Yu Hsin Hsieh	R
	female	squash	2012	Dec 2012	56	Thaisa Serafini	BRA		R		male	badminton	Yuhan Tan	L
	female	squash	2012	Dec 2012	57	Kanzy Emad El Defrawy	EGY		R		male	badminton	Yun Hu	R
	female	squash	2012	Dec 2012	58	Milou van der Heijden	NED		R		male	badminton	Yun Lung Chan	R
	female	squash	2012	Dec 2012	59	Tong Tsz-Wing	HKG		R		male	badminton	Zhengming Wang	R
	female	squash	2012	Dec 2012	60	Laura Pomportes	FRA		R		male	badminton	Zi Liang Derek Wong	R
	female	squash	2012	Dec 2012	61	Lotte Eriksen	NOR		R		male	badminton	Zulfadli Zulkiffli	R
	female	squash	2012	Dec 2012	62	Birgit Coufal	AUT		R		male	baseball (pitcher)	A.J. Burnett	R
	female	squash	2012	Dec 2012	63	Melody Francis	AUS		R		male	baseball (pitcher)	A.J. Griffin	R
	female	squash	2012	Dec 2012	64	Carmen Lee	HKG		R		male	baseball (pitcher)	Aaron Harang	R
	female	squash	2012	Dec 2012	65	Olivia Blatchford	USA		R		male	baseball (pitcher)	Adam Wainwright	R
	female	squash	2012	Dec 2012	66	Cheyna Tucker	RSA		R		male	baseball (pitcher)	Alex Cobb	R
	female	squash	2012	Dec 2012	67	Tamika Saxby	AUS		R		male	baseball (pitcher)	Alex Wood	L
	female	squash	2012	Dec 2012	68	Victoria Bell	ENG		R		male	baseball (pitcher)	Alexi Ogando	R
	female	squash	2012	Dec 2012	69	Farah Abdel Meguid	EGY		R		male	baseball (pitcher)	Alfredo Simon	R
	female	squash	2012	Dec 2012	70	Alexandra Norman	CAN		R		male	baseball (pitcher)	Andrew Cashner	R
	female	squash	2012	Dec 2012	71	Christine Nunn	AUS		R		male	baseball (pitcher)	Andy Pettitte	L
	female	squash	2012	Dec 2012	72	Salma Hany	EGY		R		male	baseball (pitcher)	Anibal Sanchez	R
	female	squash	2012	Dec 2012	73	Carrie Ramsey	ENG		R		male	baseball (pitcher)	Barry Zito	L
	female	squash	2012	Dec 2012	74	Salma Hany Ibrahim	EGY		R		male	baseball (pitcher)	Bartolo Colon	R
	female	squash	2012	Dec 2012	75	Anaka Alankamony	IND		R		male	baseball (pitcher)	Brad Bergesen	R
	female	squash	2012	Dec 2012	76	Orla Noom	NED		L		male	baseball (pitcher)	Brad Penny	R
	female	squash	2012	Dec 2012	77	Nouran Gohar	EGY		R		male	baseball (pitcher)	Braden Looper	R
	female	squash	2012	Dec 2012	78	Yathreb Adel	EGY		R		male	baseball (pitcher)	Brandon McCarthy	R
	female	squash	2012	Dec 2012	79	Maud Duplomb	FRA		R		male	baseball (pitcher)	Brandon Morrow	R
	female	squash	2012	Dec 2012	80	Sabrina Sobhy	USA		R		male	baseball (pitcher)	Brett Anderson	L
	female	squash	2012	Dec 2012	81	Celia Allamargot	FRA		R		male	baseball (pitcher)	Brett Cecil	L
	female	squash	2012	Dec 2012	82	Pushppa Devi	MAS		N/A		male	baseball (pitcher)	Brett Myers	R
	female	squash	2012	Dec 2012	83	Zulhijjah Binti Azan	MAS		R		male	baseball (pitcher)	Brian Matusz	L
	female	squash	2012	Dec 2012	84	Zephanie Curgenven	ENG		R		male	baseball (pitcher)	Bronson Arroyo	R
	female	squash	2012	Dec 2012	85	Song Sun-Mi	KOR		R		male	baseball (pitcher)	Bruce Chen	L
	female	squash	2012	Dec 2012	86	Vanessa Raj	MAS		R		male	baseball (pitcher)	Bud Norris	R
	female	squash	2012	Dec 2012	87	Sally Skaarenborg	DEN		R		male	baseball (pitcher)	C.J. Wilson	L
	female	squash	2012	Dec 2012	88	Larissa Huffer	AUS		R		male	baseball (pitcher)	Carl Pavano	R
	female	squash	2012	Dec 2012	89	Samantha Foyle	AUS		R		male	baseball (pitcher)	Carlos Zambrano	R
	female	squash	2012	Dec 2012	90	Karman Siu	HKG		R		male	baseball (pitcher)	CC Sabathia	L
	female	squash	2012	Dec 2012	91	Nayelly Hernandez	MEX		R		male	baseball (pitcher)	Chad Billingsley	R
	female	squash	2012	Dec 2012	92	Stephanie Edmison	CAN		R		male	baseball (pitcher)	Charlie Morton	R
	female	squash	2012	Dec 2012	93	Leonie Holt	ENG		R		male	baseball (pitcher)	Chris Archer	R
	female	squash	2012	Dec 2012	94	Ivonne Diaz	MEX		R		male	baseball (pitcher)	Chris Capuano	L
	female	squash	2012	Dec 2012	95	Cyrielle Peltier	FRA		R		male	baseball (pitcher)	Chris Carpenter	R
	female	squash	2012	Dec 2012	96	Chloe Mesic	FRA		L		male	baseball (pitcher)	Chris Narveson	L
	female	squash	2012	Dec 2012	97	Julia Le Coq	FRA		R		male	baseball (pitcher)	Chris Sale	L
	female	squash	2012	Dec 2012	98	Alix Younger	CAN		R		male	baseball (pitcher)	Chris Tillman	R
	female	squash	2012	Dec 2012	99	Li Dongjin	CHN		R		male	baseball (pitcher)	Chris Volstad	R
	female	squash	2012	Dec 2012	100	Hollie Naughton	CAN		L		male	baseball (pitcher)	Chris Young	R
	female	squash	2013	Dec 2013	1	Nicol David	MAS		R		male	baseball (pitcher)	Clay Buchholz	R
	female	squash	2013	Dec 2013	2	Laura Massaro	ENG		R		male	baseball (pitcher)	Clayton Kershaw	L
	female	squash	2013	Dec 2013	3	Raneem El Welily	EGY		R		male	baseball (pitcher)	Clayton Richard	L
	female	squash	2013	Dec 2013	4	Alison Waters	ENG		R		male	baseball (pitcher)	Cliff Lee	L
	female	squash	2013	Dec 2013	5	Camille Serme	FRA		R		male	baseball (pitcher)	Colby Lewis	R
	female	squash	2013	Dec 2013	6	Joelle King	NZL		R		male	baseball (pitcher)	Cole Hamels	L
	female	squash	2013	Dec 2013	7	Jenny Duncalf	ENG		R		male	baseball (pitcher)	Corey Kluber	R
	female	squash	2013	Dec 2013	8	Low Wee Wern	MAS		R		male	baseball (pitcher)	Dallas Braden	L
	female	squash	2013	Dec 2013	9	Natalie Grinham	NED		R		male	baseball (pitcher)	Dallas Keuchel	L
	female	squash	2013	Dec 2013	10	Madeline Perry	IRL		R		male	baseball (pitcher)	Dan Haren	R
	female	squash	2013	Dec 2013	11	Kasey Brown	AUS		R		male	baseball (pitcher)	Daniel Hudson	R
	female	squash	2013	Dec 2013	12	Dipika Pallikal	IND		R		male	baseball (pitcher)	Dave Bush	R
	female	squash	2013	Dec 2013	13	Omneya Abdel Kawy	EGY		R		male	baseball (pitcher)	David Price	L
	female	squash	2013	Dec 2013	14	Rachael Grinham	AUS		R		male	baseball (pitcher)	Derek Holland	L
	female	squash	2013	Dec 2013	15	Nour El Sherbini	EGY		R		male	baseball (pitcher)	Derek Lowe	R
	female	squash	2013	Dec 2013	16	Annie Au	HKG		L		male	baseball (pitcher)	Dillon Gee	R
	female	squash	2013	Dec 2013	17	Sarah-Jane Perry	ENG		R		male	baseball (pitcher)	Doug Davis	L
	female	squash	2013	Dec 2013	18	Amanda Sobhy	USA		L		male	baseball (pitcher)	Doug Fister	R
	female	squash	2013	Dec 2013	19	Nicolette Fernandes	GUY		R		male	baseball (pitcher)	Drew Hutchison	R
	female	squash	2013	Dec 2013	20	Line Hansen	DEN		R		male	baseball (pitcher)	Edinson Volquez	R
	female	squash	2013	Dec 2013	21	Joey Chan	HKG		L		male	baseball (pitcher)	Edwin Jackson	R
	female	squash	2013	Dec 2013	22	Donna Urquhart	AUS		L		male	baseball (pitcher)	Eric Stults	L
	female	squash	2013	Dec 2013	23	Sarah Campion	ENG		R		male	baseball (pitcher)	Ervin Santana	R
	female	squash	2013	Dec 2013	24	Emily Whitlock	ENG		R		male	baseball (pitcher)	Felix Doubront	L
	female	squash	2013	Dec 2013	25	Emma Beddoes	ENG		R		male	baseball (pitcher)	Felix Hernandez	R
	female	squash	2013	Dec 2013	26	Joshna Chinappa	IND		R		male	baseball (pitcher)	Francisco Liriano	L
	female	squash	2013	Dec 2013	27	Nour El Tayeb	EGY		R		male	baseball (pitcher)	Garrett Richards	R
	female	squash	2013	Dec 2013	28	Aisling Blake	IRL		R		male	baseball (pitcher)	Gavin Floyd	R
	female	squash	2013	Dec 2013	29	Latasha Khan	USA		R		male	baseball (pitcher)	Gio Gonzalez	L
	female	squash	2013	Dec 2013	30	Victoria Lust	ENG		R		male	baseball (pitcher)	Hector Noesi	R
	female	squash	2013	Dec 2013	31	Delia Arnold	MAS		R		male	baseball (pitcher)	Henderson Alvarez	R
	female	squash	2013	Dec 2013	32	Samantha Cornett	CAN		R		male	baseball (pitcher)	Hiroki Kuroda	R
	female	squash	2013	Dec 2013	33	Siyoli Waters	RSA		R		male	baseball (pitcher)	Hisashi Iwakuma	R
	female	squash	2013	Dec 2013	34	Samantha Teran	MEX		R		male	baseball (pitcher)	Homer Bailey	R
	female	squash	2013	Dec 2013	35	Misaki Kobayashi	JPN		R		male	baseball (pitcher)	Hyun-Jin Ryu	L
	female	squash	2013	Dec 2013	36	Yathreb Adel	EGY		R		male	baseball (pitcher)	Ian Kennedy	R
	female	squash	2013	Dec 2013	37	Heba El Torky	EGY		R		male	baseball (pitcher)	Ivan Nova	R
	female	squash	2013	Dec 2013	38	Nouran Gohar	EGY		R		male	baseball (pitcher)	J.A. Happ	L
	female	squash	2013	Dec 2013	39	Tesni Evans	WAL		R		male	baseball (pitcher)	Jaime Garcia	L
	female	squash	2013	Dec 2013	40	Coline Aumard	FRA		R		male	baseball (pitcher)	Jair Jurrjens	R
	female	squash	2013	Dec 2013	41	Lisa Aitken	ENG		L		male	baseball (pitcher)	Jake Odorizzi	R
	female	squash	2013	Dec 2013	42	Kylie Lindsay	NZL		R		male	baseball (pitcher)	Jake Peavy	R
	female	squash	2013	Dec 2013	43	Lisa Camilleri	AUS		R		male	baseball (pitcher)	Jake Westbrook	R
	female	squash	2013	Dec 2013	44	Amanda Landers-Murphy	NZL		L		male	baseball (pitcher)	James McDonald	R
	female	squash	2013	Dec 2013	45	Salma Hany Ibrahim	EGY		R		male	baseball (pitcher)	James Shields	R
	female	squash	2013	Dec 2013	46	Megan Craig	NZL		R		male	baseball (pitcher)	Jamie Moyer	L
	female	squash	2013	Dec 2013	47	Liu Tsz-Ling	HKG		R		male	baseball (pitcher)	Jarred Cosart	R
	female	squash	2013	Dec 2013	48	Olga Ertlova	CZE		R		male	baseball (pitcher)	Jarrod Parker	R
	female	squash	2013	Dec 2013	49	Lucie Fialova	CZE		L		male	baseball (pitcher)	Jarrod Washburn	L
	female	squash	2013	Dec 2013	50	Melody Francis	AUS		R		male	baseball (pitcher)	Jason Hammel	R
	female	squash	2013	Dec 2013	51	Sabrina Sobhy	USA		R		male	baseball (pitcher)	Jason Marquis	R
	female	squash	2013	Dec 2013	52	Deon Saffery	WAL		R		male	baseball (pitcher)	Jason Vargas	L
	female	squash	2013	Dec 2013	53	Olivia Blatchford	USA		R		male	baseball (pitcher)	Javier Vazquez	R
	female	squash	2013	Dec 2013	54	Milou van der Heijden	NED		R		male	baseball (pitcher)	Jeff Francis	L
	female	squash	2013	Dec 2013	55	Tong Tsz-Wing	HKG		R		male	baseball (pitcher)	Jeff Karstens	R
	female	squash	2013	Dec 2013	56	Sarah Cardwell	AUS		R		male	baseball (pitcher)	Jeff Locke	L
	female	squash	2013	Dec 2013	57	Birgit Coufal	AUT		R		male	baseball (pitcher)	Jeff Niemann	R
	female	squash	2013	Dec 2013	58	Laura Pomportes	FRA		R		male	baseball (pitcher)	Jeff Samardzija	R
	female	squash	2013	Dec 2013	59	Maria Toorpakai Wazir	PAK		R		male	baseball (pitcher)	Jered Weaver	R
	female	squash	2013	Dec 2013	60	Carrie Ramsey	ENG		R		male	baseball (pitcher)	Jeremy Bonderman	R
	female	squash	2013	Dec 2013	61	Habiba Mohamed	EGY		R		male	baseball (pitcher)	Jeremy Guthrie	R
	female	squash	2013	Dec 2013	62	Kanzy Emad El Defrawy	EGY		R		male	baseball (pitcher)	Jeremy Hellickson	R
	female	squash	2013	Dec 2013	63	Salma Nassar	EGY		L		male	baseball (pitcher)	Jerome Williams	R
	female	squash	2013	Dec 2013	64	Tamika Saxby	AUS		R		male	baseball (pitcher)	Jhoulys Chacin	R
	female	squash	2013	Dec 2013	65	Milnay Louw	RSA		R		male	baseball (pitcher)	Joe Blanton	R
	female	squash	2013	Dec 2013	66	Kristen Lange	USA		R		male	baseball (pitcher)	Joe Saunders	L
	female	squash	2013	Dec 2013	67	Zulhijjah Binti Azan	MAS		R		male	baseball (pitcher)	Joel Pineiro	R
	female	squash	2013	Dec 2013	68	Christine Nunn	AUS		R		male	baseball (pitcher)	Johan Santana	L
	female	squash	2013	Dec 2013	69	Rachel Arnold	MAS		R		male	baseball (pitcher)	John Danks	L
	female	squash	2013	Dec 2013	70	Mariam Metwally	EGY		R		male	baseball (pitcher)	John Lackey	R
	female	squash	2013	Dec 2013	71	Lotte Eriksen	NOR		R		male	baseball (pitcher)	John Lannan	L
	female	squash	2013	Dec 2013	72	Maria Antonella Falcione	ARG		R		male	baseball (pitcher)	Johnny Cueto	R
	female	squash	2013	Dec 2013	73	Maud Duplomb	FRA		R		male	baseball (pitcher)	Jon Garland	R
	female	squash	2013	Dec 2013	74	Gaby Huber	SUI		R		male	baseball (pitcher)	Jon Lester	L
	female	squash	2013	Dec 2013	75	Cyrielle Peltier	FRA		R		male	baseball (pitcher)	Jonathan Sanchez	L
	female	squash	2013	Dec 2013	76	Nayelly Hernandez	MEX		R		male	baseball (pitcher)	Jonathon Niese	L
	female	squash	2013	Dec 2013	77	Thaisa Serafini	BRA		R		male	baseball (pitcher)	Jordan Zimmermann	R
	female	squash	2013	Dec 2013	78	Kim Ga-Hye	KOR		N/A		male	baseball (pitcher)	Jorge De La Rosa	L
	female	squash	2013	Dec 2013	79	Alexandra Norman	CAN		R		male	baseball (pitcher)	Jose Fernandez	R
	female	squash	2013	Dec 2013	80	Eun Chan Ahn	KOR		R		male	baseball (pitcher)	Jose Quintana	L
	female	squash	2013	Dec 2013	81	Victoria Temple-Murray	ENG		R		male	baseball (pitcher)	Josh Beckett	R
	female	squash	2013	Dec 2013	82	Cheyna Tucker	RSA		R		male	baseball (pitcher)	Josh Collmenter	R
	female	squash	2013	Dec 2013	83	Hollie Naughton	CAN		L		male	baseball (pitcher)	Josh Johnson	R
	female	squash	2013	Dec 2013	84	Cecelia Cortes	USA		L		male	baseball (pitcher)	Josh Tomlin	R
	female	squash	2013	Dec 2013	85	Nouran El Torky	EGY		R		male	baseball (pitcher)	Julio Teheran	R
	female	squash	2013	Dec 2013	86	Nikki Todd	CAN		R		male	baseball (pitcher)	Justin Masterson	R
	female	squash	2013	Dec 2013	87	Jessica Turnbull	AUS		N/A		male	baseball (pitcher)	Justin Verlander	R
	female	squash	2013	Dec 2013	88	Song Sun-Mi	KOR		R		male	baseball (pitcher)	Kevin Correia	R
	female	squash	2013	Dec 2013	89	Catalina Pelaez	COL		R		male	baseball (pitcher)	Kevin Millwood	R
	female	squash	2013	Dec 2013	90	Li Dongjin	CHN		R		male	baseball (pitcher)	Kris Medlen	R
	female	squash	2013	Dec 2013	91	Julia Le Coq	FRA		R		male	baseball (pitcher)	Kyle Davies	R
	female	squash	2013	Dec 2013	92	Chloe Mesic	FRA		L		male	baseball (pitcher)	Kyle Gibson	R
	female	squash	2013	Dec 2013	93	Nadine Shahin	EGY		R		male	baseball (pitcher)	Kyle Kendrick	R
	female	squash	2013	Dec 2013	94	Nele Gilis	BEL		R		male	baseball (pitcher)	Kyle Lohse	R
	female	squash	2013	Dec 2013	95	Orla Noom	NED		L		male	baseball (pitcher)	Lance Lynn	R
	female	squash	2013	Dec 2013	96	Diana Garcia	MEX		R		male	baseball (pitcher)	Livan Hernandez	R
	female	squash	2013	Dec 2013	97	Alexandra Fuller	RSA		R		male	baseball (pitcher)	Lucas Harrell	R
	female	squash	2013	Dec 2013	98	Nada Elkalaawy	ENG		R		male	baseball (pitcher)	Luis Mendoza	R
	female	squash	2013	Dec 2013	99	Carmen Lee	HKG		R		male	baseball (pitcher)	Luke Hochevar	R
	female	squash	2013	Dec 2013	100	Ivonne Diaz	MEX		R		male	baseball (pitcher)	Madison Bumgarner	L
	female	squash	2014	Dec 2014	1	Nicol David	MAS		R		male	baseball (pitcher)	Mark Buehrle	L
	female	squash	2014	Dec 2014	2	Laura Massaro	ENG		R		male	baseball (pitcher)	Mat Latos	R
	female	squash	2014	Dec 2014	3	Raneem El Welily	EGY		R		male	baseball (pitcher)	Matt Cain	R
	female	squash	2014	Dec 2014	4	Nour El Sherbini	EGY		R		male	baseball (pitcher)	Matt Garza	R
	female	squash	2014	Dec 2014	5	Alison Waters	ENG		R		male	baseball (pitcher)	Matt Harrison	L
	female	squash	2014	Dec 2014	6	Camille Serme	FRA		R		male	baseball (pitcher)	Matt Harvey	R
	female	squash	2014	Dec 2014	7	Low Wee Wern	MAS		R		male	baseball (pitcher)	Matt Moore	L
	female	squash	2014	Dec 2014	8	Nour El Tayeb	EGY		R		male	baseball (pitcher)	Max Scherzer	R
	female	squash	2014	Dec 2014	9	Annie Au	HKG		L		male	baseball (pitcher)	Michael Pineda	R
	female	squash	2014	Dec 2014	10	Omneya Abdel Kawy	EGY		R		male	baseball (pitcher)	Miguel Gonzalez	R
	female	squash	2014	Dec 2014	11	Amanda Sobhy	USA		L		male	baseball (pitcher)	Mike Leake	R
	female	squash	2014	Dec 2014	12	Joelle King	NZL		R		male	baseball (pitcher)	Mike Minor	L
	female	squash	2014	Dec 2014	13	Rachael Grinham	AUS		R		male	baseball (pitcher)	Mike Pelfrey	R
	female	squash	2014	Dec 2014	14	Madeline Perry	IRL		R		male	baseball (pitcher)	Nathan Eovaldi	R
	female	squash	2014	Dec 2014	15	Jenny Duncalf	ENG		R		male	baseball (pitcher)	Nick Blackburn	R
	female	squash	2014	Dec 2014	16	Dipika Pallikal	IND		R		male	baseball (pitcher)	Patrick Corbin	L
	female	squash	2014	Dec 2014	17	Sarah-Jane Perry	ENG		R		male	baseball (pitcher)	Paul Maholm	L
	female	squash	2014	Dec 2014	18	Emma Beddoes	ENG		R		male	baseball (pitcher)	Phil Hughes	R
	female	squash	2014	Dec 2014	19	Nouran Gohar	EGY		R		male	baseball (pitcher)	Philip Humber	R
	female	squash	2014	Dec 2014	20	Sarah Campion	ENG		R		male	baseball (pitcher)	R.A. Dickey	R
	female	squash	2014	Dec 2014	21	Nicolette Fernandes	GUY		R		male	baseball (pitcher)	Randy Wells	R
	female	squash	2014	Dec 2014	22	Joshna Chinappa	IND		R		male	baseball (pitcher)	Randy Wolf	L
	female	squash	2014	Dec 2014	23	Joey Chan	HKG		L		male	baseball (pitcher)	Rick Porcello	R
	female	squash	2014	Dec 2014	24	Habiba Mohamed	EGY		R		male	baseball (pitcher)	Ricky Nolasco	R
	female	squash	2014	Dec 2014	25	Salma Hany Ibrahim	EGY		R		male	baseball (pitcher)	Ricky Romero	L
	female	squash	2014	Dec 2014	26	Line Hansen	DEN		R		male	baseball (pitcher)	Roberto Hernandez	R
	female	squash	2014	Dec 2014	27	Heba El Torky	EGY		R		male	baseball (pitcher)	Rodrigo Lopez	R
	female	squash	2014	Dec 2014	28	Tesni Evans	WAL		R		male	baseball (pitcher)	Roenis Elias	L
	female	squash	2014	Dec 2014	29	Emily Whitlock	ENG		R		male	baseball (pitcher)	Ross Detwiler	L
	female	squash	2014	Dec 2014	30	Delia Arnold	MAS		R		male	baseball (pitcher)	Ross Ohlendorf	R
	female	squash	2014	Dec 2014	31	Samantha Cornett	CAN		R		male	baseball (pitcher)	Roy Halladay	R
	female	squash	2014	Dec 2014	32	Victoria Lust	ENG		R		male	baseball (pitcher)	Roy Oswalt	R
	female	squash	2014	Dec 2014	33	Siyoli Waters	RSA		R		male	baseball (pitcher)	Ryan Dempster	R
	female	squash	2014	Dec 2014	34	Samantha Teran	MEX		R		male	baseball (pitcher)	Ryan Vogelsong	R
	female	squash	2014	Dec 2014	35	Donna Urquhart	AUS		L		male	baseball (pitcher)	Scott Baker	R
	female	squash	2014	Dec 2014	36	Misaki Kobayashi	JPN		R		male	baseball (pitcher)	Scott Diamond	L
	female	squash	2014	Dec 2014	37	Aisling Blake	IRL		R		male	baseball (pitcher)	Scott Feldman	R
	female	squash	2014	Dec 2014	38	Coline Aumard	FRA		R		male	baseball (pitcher)	Scott Kazmir	L
	female	squash	2014	Dec 2014	39	Yathreb Adel	EGY		R		male	baseball (pitcher)	Shaun Marcum	R
	female	squash	2014	Dec 2014	40	Olivia Blatchford	USA		R		male	baseball (pitcher)	Shelby Miller	R
	female	squash	2014	Dec 2014	41	Nadine Shahin	EGY		R		male	baseball (pitcher)	Sonny Gray	R
	female	squash	2014	Dec 2014	42	Milou van der Heijden	NED		R		male	baseball (pitcher)	Stephen Strasburg	R
	female	squash	2014	Dec 2014	43	Amanda Landers-Murphy	NZL		L		male	baseball (pitcher)	Tanner Roark	R
	female	squash	2014	Dec 2014	44	Deon Saffery	WAL		R		male	baseball (pitcher)	Ted Lilly	L
	female	squash	2014	Dec 2014	45	Megan Craig	NZL		R		male	baseball (pitcher)	Tim Hudson	R
	female	squash	2014	Dec 2014	46	Liu Tsz-Ling	HKG		R		male	baseball (pitcher)	Tim Lincecum	R
	female	squash	2014	Dec 2014	47	Lucie Fialova	CZE		L		male	baseball (pitcher)	Tim Stauffer	R
	female	squash	2014	Dec 2014	48	Tong Tsz-Wing	HKG		R		male	baseball (pitcher)	Tom Koehler	R
	female	squash	2014	Dec 2014	49	Latasha Khan	USA		R		male	baseball (pitcher)	Tommy Hanson	R
	female	squash	2014	Dec 2014	50	Mariam Metwally	EGY		R		male	baseball (pitcher)	Tommy Milone	L
	female	squash	2014	Dec 2014	51	Nouran El Torky	EGY		R		male	baseball (pitcher)	Travis Wood	L
	female	squash	2014	Dec 2014	52	Sabrina Sobhy	USA		R		male	baseball (pitcher)	Trevor Cahill	R
	female	squash	2014	Dec 2014	53	Lotte Eriksen	NOR		R		male	baseball (pitcher)	Tyson Ross	R
	female	squash	2014	Dec 2014	54	Laura Pomportes	FRA		R		male	baseball (pitcher)	Ubaldo Jimenez	R
	female	squash	2014	Dec 2014	55	Lisa Camilleri	AUS		R		male	baseball (pitcher)	Wade Davis	R
	female	squash	2014	Dec 2014	56	Sarah Cardwell	AUS		R		male	baseball (pitcher)	Wade Miley	L
	female	squash	2014	Dec 2014	57	Christine Nunn	AUS		R		male	baseball (pitcher)	Wandy Rodriguez	L
	female	squash	2014	Dec 2014	58	Lisa Aitken	ENG		L		male	baseball (pitcher)	Wei-Yin Chen	L
	female	squash	2014	Dec 2014	59	Vanessa Raj	MAS		R		male	baseball (pitcher)	Wily Peralta	R
	female	squash	2014	Dec 2014	60	Cheyna Tucker	RSA		R		male	baseball (pitcher)	Yordano Ventura	R
	female	squash	2014	Dec 2014	61	Birgit Coufal	AUT		R		male	baseball (pitcher)	Yovani Gallardo	R
	female	squash	2014	Dec 2014	62	Cecelia Cortes	USA		L		male	baseball (pitcher)	Yu Darvish	R
	female	squash	2014	Dec 2014	63	Eun Chan Ahn	KOR		R		male	baseball (pitcher)	Zach Duke	L
	female	squash	2014	Dec 2014	64	Rachel Arnold	MAS		R		male	baseball (pitcher)	Zack Greinke	R
	female	squash	2014	Dec 2014	65	Hollie Naughton	CAN		L		male	baseball (pitcher)	Zack Wheeler	R
	female	squash	2014	Dec 2014	66	Kanzy Emad El Defrawy	EGY		R		male	cricket (bowler)	A. Mishra	R
	female	squash	2014	Dec 2014	67	Victoria Temple-Murray	ENG		R		male	cricket (bowler)	A. Mithun	R
	female	squash	2014	Dec 2014	68	Tamika Saxby	AUS		R		male	cricket (bowler)	A.B. de Villiers	R
	female	squash	2014	Dec 2014	69	Maria Antonella Falcione	ARG		R		male	cricket (bowler)	A.D. Mathews	R
	female	squash	2014	Dec 2014	70	Farah Abdel Meguid	EGY		R		male	cricket (bowler)	A.G. Cremer	L
	female	squash	2014	Dec 2014	71	Nikki Todd	CAN		R		male	cricket (bowler)	A.J. Redmond	R
	female	squash	2014	Dec 2014	72	Linda Hruzikova	SVK		R		male	cricket (bowler)	A.N. Petersen	R
	female	squash	2014	Dec 2014	73	Nele Gilis	BEL		R		male	cricket (bowler)	Abdur Razzak	L
	female	squash	2014	Dec 2014	74	Cyrielle Peltier	FRA		R		male	cricket (bowler)	Abdur Rehman	L
	female	squash	2014	Dec 2014	75	Sina Wall	GER		R		male	cricket (bowler)	Aftab Ahmed	R
	female	squash	2014	Dec 2014	76	Zulhijjah Binti Azan	MAS		R		male	cricket (bowler)	Aizaz Cheema	R
	female	squash	2014	Dec 2014	77	Millie Tomlinson	ENG		R		male	cricket (bowler)	Al-Amin Hossain	R
	female	squash	2014	Dec 2014	78	Catalina Pelaez	COL		R		male	cricket (bowler)	Azhar Ali	R
	female	squash	2014	Dec 2014	79	Teh Min Jie	MAS		R		male	cricket (bowler)	B. Kumar	R
	female	squash	2014	Dec 2014	80	Vanessa Chu	HKG		R		male	cricket (bowler)	B.A. Stokes	R
	female	squash	2014	Dec 2014	81	Thaisa Serafini	BRA		R		male	cricket (bowler)	B.A.W. Mendis	R
	female	squash	2014	Dec 2014	82	Chloe Mesic	FRA		L		male	cricket (bowler)	B.J. Arnel	R
	female	squash	2014	Dec 2014	83	Natalie Grinham	NED		R		male	cricket (bowler)	B.V. Vitori	L
	female	squash	2014	Dec 2014	84	Belen Etchechoury	ARG		N/A		male	cricket (bowler)	B.W. Hilfenhaus	R
	female	squash	2014	Dec 2014	85	Kylie Lindsay	NZL		R		male	cricket (bowler)	Bilawal Bhatti	R
	female	squash	2014	Dec 2014	86	Diana Garcia	MEX		R		male	cricket (bowler)	C.B. Mpofu	R
	female	squash	2014	Dec 2014	87	Olga Ertlova	CZE		R		male	cricket (bowler)	C.H. Gayle	R
	female	squash	2014	Dec 2014	88	Maud Duplomb	FRA		R		male	cricket (bowler)	C.J. Anderson	L
	female	squash	2014	Dec 2014	89	Liu Kwai Chi	MAC		R		male	cricket (bowler)	C.J. Jordan	R
	female	squash	2014	Dec 2014	90	Sivasangari Subramaniam	MAS		R		male	cricket (bowler)	C.R. Woakes	R
	female	squash	2014	Dec 2014	91	Maria Toorpakai Wazir	PAK		R		male	cricket (bowler)	C.R.D. Fernando	R
	female	squash	2014	Dec 2014	92	Jessica Turnbull	AUS		N/A		male	cricket (bowler)	C.S. Martin	R
	female	squash	2014	Dec 2014	93	Carmen Lee	HKG		R		male	cricket (bowler)	C.T. Tremlett	R
	female	squash	2014	Dec 2014	94	Lily Taylor	ENG		R		male	cricket (bowler)	D. Bishoo	R
	female	squash	2014	Dec 2014	95	Leonie Holt	ENG		R		male	cricket (bowler)	D. Elgar	R
	female	squash	2014	Dec 2014	96	Gu Jinyue	CHN		R		male	cricket (bowler)	D.A. Warner	R
	female	squash	2014	Dec 2014	97	Lakeesha Rarere	AUS		R		male	cricket (bowler)	D.A.J. Bracewell	R
	female	squash	2014	Dec 2014	98	Zoe Foo Yuk Han	MAS		R		male	cricket (bowler)	D.E. Bollinger	L
	female	squash	2014	Dec 2014	99	Menna Nasser	EGY		R		male	cricket (bowler)	D.J.G. Sammy	R
	female	squash	2014	Dec 2014	100	Milnay Louw	RSA		R		male	cricket (bowler)	D.J.J. Bravo	R
	female	table tennis	2009	Dec 2009	1	ZHANG Yining	CHN	---	R		male	cricket (bowler)	D.L. Piedt	R
	female	table tennis	2009	Dec 2009	2	GUO Yue	CHN	---	L		male	cricket (bowler)	D.L. Vettori	L
	female	table tennis	2009	Dec 2009	3	LIU Shiwen	CHN	---	R		male	cricket (bowler)	D.P.M.D. Jayawardene	R
	female	table tennis	2009	Dec 2009	4	LI Xiaoxia	CHN	---	R		male	cricket (bowler)	D.R. Tuffey	R
	female	table tennis	2009	Dec 2009	5	GUO Yan	CHN	---	R		male	cricket (bowler)	D.S. Smith	R
	female	table tennis	2009	Dec 2009	6	FENG Tianwei	SIN	---	R		male	cricket (bowler)	D.W. Steyn	R
	female	table tennis	2009	Dec 2009	7	DING Ning	CHN	---	L		male	cricket (bowler)	Danish Kaneria	R
	female	table tennis	2009	Dec 2009	8	WANG Nan	CHN	---	L		male	cricket (bowler)	E. Chigumbura	R
	female	table tennis	2009	Dec 2009	9	KIM Kyung Ah	KOR	---	R		male	cricket (bowler)	Ehsan Adil	R
	female	table tennis	2009	Dec 2009	10	FAN Ying	CHN	---	R		male	cricket (bowler)	Elias Sunny	L
	female	table tennis	2009	Dec 2009	11	JIANG Huajun	HKG	---	R		male	cricket (bowler)	Enamul Haque jnr	L
	female	table tennis	2009	Dec 2009	12	PARK Mi Young	KOR	---	R		male	cricket (bowler)	F. de Wet	R
	female	table tennis	2009	Dec 2009	13	WANG Yuegu	SIN	---	R		male	cricket (bowler)	F.H. Edwards	R
	female	table tennis	2009	Dec 2009	14	TIE Yana	HKG	---	R		male	cricket (bowler)	G. Gambhir	R
	female	table tennis	2009	Dec 2009	15	LI Jiawei	SIN	---	R		male	cricket (bowler)	G. Onions	R
	female	table tennis	2009	Dec 2009	16	LIU Jia	AUT	---	L		male	cricket (bowler)	G.C. Smith	R
	female	table tennis	2009	Dec 2009	17	SUN Beibei	SIN	---	R		male	cricket (bowler)	G.J. Maxwell	R
	female	table tennis	2009	Dec 2009	18	CAO Zhen	CHN	---	R		male	cricket (bowler)	G.P. Swann	R
	female	table tennis	2009	Dec 2009	19	DANG Ye Seo	KOR	---	R		male	cricket (bowler)	H. Masakadza	R
	female	table tennis	2009	Dec 2009	20	WU Jiaduo	GER	---	R		male	cricket (bowler)	H.M.R.K.B. Herath	L
	female	table tennis	2009	Dec 2009	21	LI Jiao	NED	---	L		male	cricket (bowler)	Harbhajan Singh	R
	female	table tennis	2009	Dec 2009	22	FUKUHARA Ai	JPN	---	R		male	cricket (bowler)	I. Sharma	R
	female	table tennis	2009	Dec 2009	23	HIRANO Sayaka	JPN	---	R		male	cricket (bowler)	I.R. Bell	R
	female	table tennis	2009	Dec 2009	24	PAVLOVICH Viktoria	BLR	---	R		male	cricket (bowler)	I.S. Sodhi	R
	female	table tennis	2009	Dec 2009	25	TOTH Krisztina	HUN	---	L		male	cricket (bowler)	Imran Khan	R
	female	table tennis	2009	Dec 2009	26	LI Qian	POL	---	R		male	cricket (bowler)	Imran Tahir	R
	female	table tennis	2009	Dec 2009	27	LI Jie	NED	---	R		male	cricket (bowler)	J. Botha	R
	female	table tennis	2009	Dec 2009	28	LIN Ling	HKG	---	R		male	cricket (bowler)	J. Nyumbu	R
	female	table tennis	2009	Dec 2009	29	YAO Yan	CHN	---	R		male	cricket (bowler)	J.D. Ryder	R
	female	table tennis	2009	Dec 2009	30	GAO Jun	USA	---	R		male	cricket (bowler)	J.D.S Neesham	R
	female	table tennis	2009	Dec 2009	31	WANG Chen	USA	---	R		male	cricket (bowler)	J.E. Root	R
	female	table tennis	2009	Dec 2009	32	YU Mengyu	SIN	---	R		male	cricket (bowler)	J.E. Taylor	R
	female	table tennis	2009	Dec 2009	33	SAMARA Elizabeta	ROU	---	L		male	cricket (bowler)	J.E.C. Franklin	L
	female	table tennis	2009	Dec 2009	34	BOROS Tamara	HRV	---	R		male	cricket (bowler)	J.H. Kallis	R
	female	table tennis	2009	Dec 2009	35	WU Yang	CHN	---	R		male	cricket (bowler)	J.L. Pattinson	R
	female	table tennis	2009	Dec 2009	36	SEOK Ha Jung	KOR	---	R		male	cricket (bowler)	J.M. Anderson	R
	female	table tennis	2009	Dec 2009	37	LI Xiaodan	CHN	---	R		male	cricket (bowler)	J.M. Bird	R
	female	table tennis	2009	Dec 2009	38	PASKAUSKIENE Ruta	LTU	---	R		male	cricket (bowler)	J.O. Holder	R
	female	table tennis	2009	Dec 2009	39	CHANG Chenchen	CHN	---	L		male	cricket (bowler)	J.P. Duminy	R
	female	table tennis	2009	Dec 2009	40	ISHIGAKI Yuka	JPN	---	R		male	cricket (bowler)	J.R. Hazlewood	R
	female	table tennis	2009	Dec 2009	41	LEE Eun Hee	KOR	---	R		male	cricket (bowler)	J.S. Patel	R
	female	table tennis	2009	Dec 2009	42	SCHALL Elke	GER	---	R		male	cricket (bowler)	Jubair Hossain	R
	female	table tennis	2009	Dec 2009	43	DODEAN Daniela	ROU	---	R		male	cricket (bowler)	Junaid Khan	L
	female	table tennis	2009	Dec 2009	44	LI Qiangbing	AUT	---	R		male	cricket (bowler)	K.A.J. Roach	R
	female	table tennis	2009	Dec 2009	45	LAU Sui Fei	HKG	---	R		male	cricket (bowler)	K.C. Brathwaite	R
	female	table tennis	2009	Dec 2009	46	FUKUOKA Haruna	JPN	---	R		male	cricket (bowler)	K.J. Abbott	R
	female	table tennis	2009	Dec 2009	46	STEFANOVA Nikoleta	ITA	---	L		male	cricket (bowler)	K.M. Jarvis	R
	female	table tennis	2009	Dec 2009	48	SUN Jin	HKG	---	L		male	cricket (bowler)	K.M.D.N. Kulasekara	R
	female	table tennis	2009	Dec 2009	49	WEN Jia	CHN	---	L		male	cricket (bowler)	K.P. Pietersen	R
	female	table tennis	2009	Dec 2009	50	KIM Jong	PRK	---	L		male	cricket (bowler)	K.S. Williamson	R
	female	table tennis	2009	Dec 2009	51	TASEI Mikie	JPN	---	R		male	cricket (bowler)	K.T.G.D. Prasad	R
	female	table tennis	2009	Dec 2009	52	HUANG Yi-Hua	TPE	---	R		male	cricket (bowler)	K.V. Sharma	R
	female	table tennis	2009	Dec 2009	53	HU Melek	TUR	---	R		male	cricket (bowler)	L.E. Plunkett	R
	female	table tennis	2009	Dec 2009	54	TAN Wenling	ITA	---	R		male	cricket (bowler)	L.L. Tsotsobe	L
	female	table tennis	2009	Dec 2009	55	HIURA Reiko	JPN	---	R		male	cricket (bowler)	M. de Lange	R
	female	table tennis	2009	Dec 2009	56	PESOTSKA Margaryta	UKR	---	R		male	cricket (bowler)	M. Morkel	R
	female	table tennis	2009	Dec 2009	57	ISHIKAWA Kasumi	JPN	---	L		male	cricket (bowler)	M. Muralidaran	R
	female	table tennis	2009	Dec 2009	58	ZHU Fang	ESP	---	R		male	cricket (bowler)	M. Ntini	R
	female	table tennis	2009	Dec 2009	59	POTA Georgina	HUN	---	R		male	cricket (bowler)	M.A. Starc	L
	female	table tennis	2009	Dec 2009	60	NI Xia Lian	LUX	---	L		male	cricket (bowler)	M.D. Craig	R
	female	table tennis	2009	Dec 2009	61	ZHANG Rui	HKG	---	R		male	cricket (bowler)	M.D.K.P. Perera	R
	female	table tennis	2009	Dec 2009	62	LOVAS Petra	HUN	---	R		male	cricket (bowler)	M.E.K. Hussey	R
	female	table tennis	2009	Dec 2009	63	TANG Liying	CHN	---	R		male	cricket (bowler)	M.F. Maharoof	R
	female	table tennis	2009	Dec 2009	64	STRBIKOVA Renata	CZE	---	R		male	cricket (bowler)	M.G. Johnson	L
	female	table tennis	2009	Dec 2009	65	MU Zi	CHN	---	R		male	cricket (bowler)	M.J. Clarke	L
	female	table tennis	2009	Dec 2009	66	PAVLOVICH Veronika	BLR	---	R		male	cricket (bowler)	M.J. Guptill	R
	female	table tennis	2009	Dec 2009	67	VACENOVSKA Iveta	CZE	---	R		male	cricket (bowler)	M.J. North	R
	female	table tennis	2009	Dec 2009	68	FUJINUMA Ai	JPN	---	L		male	cricket (bowler)	M.M. Ali	R
	female	table tennis	2009	Dec 2009	69	LI Xue ^	FRA	---	R		male	cricket (bowler)	M.M. Patel	R
	female	table tennis	2009	Dec 2009	70	KWAK Bang Bang ^	KOR	---	R		male	cricket (bowler)	M.N. Samuels	R
	female	table tennis	2009	Dec 2009	71	PAOVIC Sandra	HRV	---	R		male	cricket (bowler)	M.N. Waller	R
	female	table tennis	2009	Dec 2009	72	XU Jie	POL	---	R		male	cricket (bowler)	M.R. Gillespie	R
	female	table tennis	2009	Dec 2009	73	BARTHEL Zhenqi	GER	---	R		male	cricket (bowler)	M.S. Panesar	L
	female	table tennis	2009	Dec 2009	74	XIAN Yi Fang	FRA	---	R		male	cricket (bowler)	M.T. Thushara	L
	female	table tennis	2009	Dec 2009	75	MOON Hyun Jung	KOR	---	R		male	cricket (bowler)	Mahmudullah	R
	female	table tennis	2009	Dec 2009	76	FUJII Hiroko	JPN	---	R		male	cricket (bowler)	Mohammad Amir	L
	female	table tennis	2009	Dec 2009	77	WANG Xuan	CHN	---	R		male	cricket (bowler)	Mohammad Ashraful	R
	female	table tennis	2009	Dec 2009	78	KOMWONG Nanthana	THA	---	R		male	cricket (bowler)	Mohammad Asif	R
	female	table tennis	2009	Dec 2009	79	SILBEREISEN Kristin	GER	---	R		male	cricket (bowler)	Mohammad Hafeez	R
	female	table tennis	2009	Dec 2009	80	KOSTROMINA Tatyana (1973)	BLR	---	R		male	cricket (bowler)	Mohammad Sami	R
	female	table tennis	2009	Dec 2009	81	KOTIKHINA Irina	RUS	---	R		male	cricket (bowler)	Mohammad Shami	R
	female	table tennis	2009	Dec 2009	81	ZHENG Jiaqi ^	USA	---	R		male	cricket (bowler)	Mohammad Talha	R
	female	table tennis	2009	Dec 2009	83	KIM Mi Yong	PRK	---	L		male	cricket (bowler)	Mominul Haque	L
	female	table tennis	2009	Dec 2009	84	CHENG I-Ching	TPE	---	R		male	cricket (bowler)	N. Deonarine	R
	female	table tennis	2009	Dec 2009	85	JUN Hye Kyung	KOR	---	R		male	cricket (bowler)	N. M'shangwe	R
	female	table tennis	2009	Dec 2009	86	GANINA Svetlana	RUS	---	R		male	cricket (bowler)	N. Pradeep	R
	female	table tennis	2009	Dec 2009	87	SKOV Mie	DEN	---	R		male	cricket (bowler)	N. Wagner	L
	female	table tennis	2009	Dec 2009	88	ODOROVA Eva	SVK	---	R		male	cricket (bowler)	N.L.T.C. Perera	R
	female	table tennis	2009	Dec 2009	89	FADEEVA Oxana	RUS	---	R		male	cricket (bowler)	N.M. Hauritz	R
	female	table tennis	2009	Dec 2009	90	ERDELJI Ana-Maria	SRB	---	R		male	cricket (bowler)	N.M. Lyon	R
	female	table tennis	2009	Dec 2009	91	TIMINA Elena	NED	---	R		male	cricket (bowler)	Nasir Hossain	R
	female	table tennis	2009	Dec 2009	92	SOROCHYNSKA Tetyana	UKR	---	R		male	cricket (bowler)	P. Chawla	R
	female	table tennis	2009	Dec 2009	93	KONISHI An	JPN	---	R		male	cricket (bowler)	P.D. Collingwood	R
	female	table tennis	2009	Dec 2009	94	EKHOLM Matilda	SWE	---	L		male	cricket (bowler)	P.L. Harris	L
	female	table tennis	2009	Dec 2009	95	RAMIREZ Sara	ESP	---	R		male	cricket (bowler)	P.M. Siddle	R
	female	table tennis	2009	Dec 2009	96	DVORAK Galia	ESP	---	R		male	cricket (bowler)	P.P. Ojha	L
	female	table tennis	2009	Dec 2009	97	PARTYKA Natalia	POL	---	L		male	cricket (bowler)	R. Ashwin	R
	female	table tennis	2009	Dec 2009	98	SEO Hyo Won	KOR	---	R		male	cricket (bowler)	R. McLaren	R
	female	table tennis	2009	Dec 2009	99	CAO Lisi	CHN	---	R		male	cricket (bowler)	R. Rampaul	R
	female	table tennis	2009	Dec 2009	100	CHOI Moon Young	KOR	---	R		male	cricket (bowler)	R.A. Jadeja	L
	female	table tennis	2010	Dec 2010	1	GUO Yan	CHN	---	R		male	cricket (bowler)	R.A.S. Lakmal	R
	female	table tennis	2010	Dec 2010	2	GUO Yue	CHN	---	L		male	cricket (bowler)	R.J. Harris	R
	female	table tennis	2010	Dec 2010	3	FENG Tianwei	SIN	---	R		male	cricket (bowler)	R.J. Peterson	L
	female	table tennis	2010	Dec 2010	4	LIU Shiwen	CHN	---	R		male	cricket (bowler)	R.J. Sidebottom	L
	female	table tennis	2010	Dec 2010	5	KIM Kyungah	KOR	---	R		male	cricket (bowler)	R.K. Kleinveldt	R
	female	table tennis	2010	Dec 2010	6	LI Xiaoxia	CHN	---	R		male	cricket (bowler)	R.L. Taylor	R
	female	table tennis	2010	Dec 2010	7	DING Ning	CHN	---	L		male	cricket (bowler)	R.M.S. Eranga	R
	female	table tennis	2010	Dec 2010	8	WANG Yuegu	SIN	---	R		male	cricket (bowler)	R.P. Singh	L
	female	table tennis	2010	Dec 2010	9	FUKUHARA Ai	JPN	---	R		male	cricket (bowler)	R.R. Sarwan	R
	female	table tennis	2010	Dec 2010	10	JIANG Huajun	HKG	---	R		male	cricket (bowler)	R.W. Price	L
	female	table tennis	2010	Dec 2010	11	LI Jiao	NED	---	L		male	cricket (bowler)	Rahat Ali	L
	female	table tennis	2010	Dec 2010	12	FENG Yalan	CHN	---	R		male	cricket (bowler)	Raqibul Hasan	R
	female	table tennis	2010	Dec 2010	13	TIE Yana	HKG	---	R		male	cricket (bowler)	Robiul Islam	R
	female	table tennis	2010	Dec 2010	14	HIRANO Sayaka	JPN	---	R		male	cricket (bowler)	Rubel Hossain	R
	female	table tennis	2010	Dec 2010	14	PARK Miyoung	KOR	---	R		male	cricket (bowler)	S. Chanderpaul	R
	female	table tennis	2010	Dec 2010	16	WU Jiaduo	GER	---	R		male	cricket (bowler)	S. Randiv	R
	female	table tennis	2010	Dec 2010	17	SEOK Hajung	KOR	---	R		male	cricket (bowler)	S. Shillingford	R
	female	table tennis	2010	Dec 2010	18	YU Mengyu	SIN	---	R		male	cricket (bowler)	S. Sreesanth	R
	female	table tennis	2010	Dec 2010	19	WU Yang	CHN	---	R		male	cricket (bowler)	S.C.J. Broad	R
	female	table tennis	2010	Dec 2010	20	ISHIKAWA Kasumi	JPN	---	L		male	cricket (bowler)	S.G. Borthwick	R
	female	table tennis	2010	Dec 2010	21	SHEN Yanfei	ESP	---	L		male	cricket (bowler)	S.J. Benn	L
	female	table tennis	2010	Dec 2010	22	SUN Beibei	SIN	---	R		male	cricket (bowler)	S.K. Raina	R
	female	table tennis	2010	Dec 2010	23	ZHU Yuling	CHN	---	R		male	cricket (bowler)	S.L. Malinga	R
	female	table tennis	2010	Dec 2010	24	CAO Zhen	CHN	---	R		male	cricket (bowler)	S.M. Katich	L
	female	table tennis	2010	Dec 2010	24	ISHIGAKI Yuka	JPN	---	R		male	cricket (bowler)	S.N.J. O'Keefe	L
	female	table tennis	2010	Dec 2010	26	PAVLOVICH Viktoria	BLR	---	R		male	cricket (bowler)	S.P. Narine	R
	female	table tennis	2010	Dec 2010	27	HUANG Yi-Hua	TPE	---	R		male	cricket (bowler)	S.P.D. Smith	R
	female	table tennis	2010	Dec 2010	28	LI Jie	NED	---	R		male	cricket (bowler)	S.R. Tendulkar	R
	female	table tennis	2010	Dec 2010	29	LI Qian	POL	---	R		male	cricket (bowler)	S.R. Watson	R
	female	table tennis	2010	Dec 2010	30	SILBEREISEN Kristin	GER	---	R		male	cricket (bowler)	S.S. Cottrell	L
	female	table tennis	2010	Dec 2010	31	LI Jiawei	SIN	---	R		male	cricket (bowler)	S.T. Finn	R
	female	table tennis	2010	Dec 2010	32	DODEAN Daniela	ROU	---	R		male	cricket (bowler)	S.T. Gabriel	R
	female	table tennis	2010	Dec 2010	33	HU Melek	TUR	---	R		male	cricket (bowler)	S.W. Masakadza	R
	female	table tennis	2010	Dec 2010	34	LIU Jia	AUT	---	L		male	cricket (bowler)	Saeed Ajmal	R
	female	table tennis	2010	Dec 2010	35	CHENG I-Ching	TPE	---	R		male	cricket (bowler)	Sajidul Islam	L
	female	table tennis	2010	Dec 2010	36	DANG Yeseo	KOR	---	R		male	cricket (bowler)	Shafiul Islam	R
	female	table tennis	2010	Dec 2010	37	YAO Yan	CHN	---	R		male	cricket (bowler)	Shahadat Hossain	R
	female	table tennis	2010	Dec 2010	38	SAMARA Elizabeta	ROU	---	L		male	cricket (bowler)	Shahid Afridi	R
	female	table tennis	2010	Dec 2010	39	KANG Misoon ^	KOR	---	L		male	cricket (bowler)	Shakib Al Hasan	L
	female	table tennis	2010	Dec 2010	40	TOTH Krisztina	HUN	---	L		male	cricket (bowler)	Shikandar Raza	R
	female	table tennis	2010	Dec 2010	41	NI Xialian	LUX	---	L		male	cricket (bowler)	Shoaib Malik	R
	female	table tennis	2010	Dec 2010	42	LEE Eunhee	KOR	---	R		male	cricket (bowler)	Sohag Gazi	R
	female	table tennis	2010	Dec 2010	43	POTA Georgina	HUN	---	R		male	cricket (bowler)	T. Panyangara	R
	female	table tennis	2010	Dec 2010	44	GU Yuting	CHN	---	L		male	cricket (bowler)	T.A. Boult	L
	female	table tennis	2010	Dec 2010	45	GAO Jun	USA	---	R		male	cricket (bowler)	T.G. Southee	R
	female	table tennis	2010	Dec 2010	46	FUKUOKA Haruna	JPN	---	R		male	cricket (bowler)	T.L. Best	R
	female	table tennis	2010	Dec 2010	46	LAU Sui Fei	HKG	---	R		male	cricket (bowler)	T.L. Chatara	R
	female	table tennis	2010	Dec 2010	48	KIM Jong	PRK	---	L		male	cricket (bowler)	T.M. Dilshan	R
	female	table tennis	2010	Dec 2010	49	HIURA Reiko	JPN	---	R		male	cricket (bowler)	T.T. Bresnan	R
	female	table tennis	2010	Dec 2010	50	PENG Luyang	CHN	---	R		male	cricket (bowler)	T.T. Samaraweera	R
	female	table tennis	2010	Dec 2010	51	ZHANG Rui	HKG	---	R		male	cricket (bowler)	Taijul Islam	R
	female	table tennis	2010	Dec 2010	52	LIN Ling	HKG	---	R		male	cricket (bowler)	Tanvir Ahmed	R
	female	table tennis	2010	Dec 2010	52	YI Fangxian ^^	USA	---	R		male	cricket (bowler)	U. Yadav	R
	female	table tennis	2010	Dec 2010	54	ZHU Fang	ESP	---	R		male	cricket (bowler)	U.W.M.B.C. Welegedara	L
	female	table tennis	2010	Dec 2010	55	LI Xue ^	FRA	---	R		male	cricket (bowler)	Umar Gul	R
	female	table tennis	2010	Dec 2010	56	CHEN Meng	CHN	---	R		male	cricket (bowler)	V. Permaul	L
	female	table tennis	2010	Dec 2010	57	STEFANOVA Nikoleta	ITA	---	L		male	cricket (bowler)	V. Sehwag	R
	female	table tennis	2010	Dec 2010	58	FUJII Hiroko	JPN	---	R		male	cricket (bowler)	V.D. Philander	R
	female	table tennis	2010	Dec 2010	59	PASKAUSKIENE Ruta	LTU	---	R		male	cricket (bowler)	V.R. Aaron	R
	female	table tennis	2010	Dec 2010	60	LI Xiaodan	CHN	---	R		male	cricket (bowler)	W.D. Parnell	L
	female	table tennis	2010	Dec 2010	61	WU Xue	DOM	---	L		male	cricket (bowler)	Wahab Riaz	L
	female	table tennis	2010	Dec 2010	62	SEO Hyowon	KOR	---	R		male	cricket (bowler)	X.J. Doherty	L
	female	table tennis	2010	Dec 2010	63	LOVAS Petra	HUN	---	R		male	cricket (bowler)	Yasir Shah	R
	female	table tennis	2010	Dec 2010	64	ZHAO Yan	CHN	---	R		male	cricket (bowler)	Younus Khan	R
	female	table tennis	2010	Dec 2010	65	TIKHOMIROVA Anna	RUS	---	R		male	cricket (bowler)	Yuvraj Singh	L
	female	table tennis	2010	Dec 2010	66	BARTHEL Zhenqi	GER	---	R		male	cricket (bowler)	Zaheer Khan	L
	female	table tennis	2010	Dec 2010	66	MOON Hyunjung	KOR	---	R		male	cricket (bowler)	Zulfiqar Babar	L
	female	table tennis	2010	Dec 2010	68	SUN Jin	HKG	---	L		male	squash	Aamir Atlas Khan	R
	female	table tennis	2010	Dec 2010	69	SHENG Dandan	CHN	---	R		male	squash	Aaron Frankcomb	R
	female	table tennis	2010	Dec 2010	70	LI Qiangbing	AUT	---	R		male	squash	Abdulla Mohd Al Tamimi	R
	female	table tennis	2010	Dec 2010	71	SCHALL Elke	GER	---	R		male	squash	Abdullah Al Muzayen	L
	female	table tennis	2010	Dec 2010	72	WEN Jia	CHN	---	L		male	squash	Adrian Grant	L
	female	table tennis	2010	Dec 2010	73	PAVLOVICH Veronika	BLR	---	R		male	squash	Adrian Waller	L
	female	table tennis	2010	Dec 2010	74	VACENOVSKA Iveta	CZE	---	R		male	squash	Ahmed Atef	R
	female	table tennis	2010	Dec 2010	75	MU Zi	CHN	---	R		male	squash	Alan Clyne	R
	female	table tennis	2010	Dec 2010	76	CHOI Moonyoung	KOR	---	R		male	squash	Alfredo Avila	R
	female	table tennis	2010	Dec 2010	77	RAO Jingwen	CHN	---	R		male	squash	Ali Farag	R
	female	table tennis	2010	Dec 2010	77	WAKAMIYA Misako	JPN	---	L		male	squash	Alister Walker	R
	female	table tennis	2010	Dec 2010	79	BILENKO Tetyana	UKR	---	R		male	squash	Ammar Altamimi	R
	female	table tennis	2010	Dec 2010	79	XU Jie	POL	---	R		male	squash	Amr Khaled Khalifa	R
	female	table tennis	2010	Dec 2010	81	GRUNDISCH Carole	FRA	---	R		male	squash	Amr Shabana	L
	female	table tennis	2010	Dec 2010	82	HAN Hye Song	PRK	---	99		male	squash	Amr Swelim	R
	female	table tennis	2010	Dec 2010	83	SONG Maeum	KOR	---	R		male	squash	Andrew McDougall	R
	female	table tennis	2010	Dec 2010	84	LEE Ho Ching	HKG	---	R		male	squash	Andrew Schnell	R
	female	table tennis	2010	Dec 2010	85	PESOTSKA Margaryta	UKR	---	R		male	squash	Andrew Wagih Shoukry	R
	female	table tennis	2010	Dec 2010	86	SKOV Mie	DEN	---	R		male	squash	Aqeel Rehman	R
	female	table tennis	2010	Dec 2010	87	IVANCAN Irene	GER	---	R		male	squash	Arshad Iqbal Burki	R
	female	table tennis	2010	Dec 2010	88	YANG Haeun	KOR	---	R		male	squash	Arthur Gaskin	R
	female	table tennis	2010	Dec 2010	89	RAMIREZ Sara	ESP	---	R		male	squash	Arturo Salazar	R
	female	table tennis	2010	Dec 2010	90	STRBIKOVA Renata	CZE	---	R		male	squash	Ben Coleman	R
	female	table tennis	2010	Dec 2010	91	LIU Xi	CHN	---	R		male	squash	Ben Ford	R
	female	table tennis	2010	Dec 2010	92	BOROS Tamara	CRO	---	R		male	squash	Bernardo Samper	R
	female	table tennis	2010	Dec 2010	93	DVORAK Galia	ESP	---	R		male	squash	Borja Golan	R
	female	table tennis	2010	Dec 2010	94	PARTYKA Natalia	POL	---	L		male	squash	Bradley Hindle	R
	female	table tennis	2010	Dec 2010	94	TIMINA Elena	NED	---	R		male	squash	Cameron Pilley	R
	female	table tennis	2010	Dec 2010	96	FUJINUMA Ai	JPN	---	L		male	squash	Campbell Grayson	R
	female	table tennis	2010	Dec 2010	97	FEHER Gabriela	SRB	---	R		male	squash	Cesar Salazar	R
	female	table tennis	2010	Dec 2010	98	ODOROVA Eva	SVK	---	R		male	squash	Charles Sharpes	R
	female	table tennis	2010	Dec 2010	99	ERDELJI Ana-Maria	SRB	---	R		male	squash	Chris Ryder	R
	female	table tennis	2010	Dec 2010	100	TAN Wenling	ITA	---	R		male	squash	Chris Simpson	R
	female	table tennis	2011	Dec 2011	1	DING Ning	CHN	---	L		male	squash	Christopher Gordon	R
	female	table tennis	2011	Dec 2011	2	LI Xiaoxia	CHN	---	R		male	squash	Clinton Leeuw	R
	female	table tennis	2011	Dec 2011	3	GUO Yan	CHN	---	R		male	squash	Dane Sharp	R
	female	table tennis	2011	Dec 2011	4	LIU Shiwen	CHN	---	R		male	squash	Danish Atlas Khan	R
	female	table tennis	2011	Dec 2011	5	FENG Tianwei	SIN	---	R		male	squash	Daryl Selby	R
	female	table tennis	2011	Dec 2011	6	GUO Yue	CHN	---	L		male	squash	David Palmer	R
	female	table tennis	2011	Dec 2011	7	ISHIKAWA Kasumi	JPN	---	L		male	squash	David Phillips	R
	female	table tennis	2011	Dec 2011	8	WANG Yuegu	SIN	---	R		male	squash	Davide Bianchetti	R
	female	table tennis	2011	Dec 2011	9	FUKUHARA Ai	JPN	---	R		male	squash	Declan James	R
	female	table tennis	2011	Dec 2011	10	TIE Yana	HKG	---	R		male	squash	Dick Lau	R
	female	table tennis	2011	Dec 2011	11	HIRANO Sayaka	JPN	---	R		male	squash	Diego Elias	R
	female	table tennis	2011	Dec 2011	12	WU Yang	CHN	---	R		male	squash	Dylan Bennett	R
	female	table tennis	2011	Dec 2011	13	JIANG Huajun	HKG	---	R		male	squash	Eddie Charlton	R
	female	table tennis	2011	Dec 2011	14	LI Jiawei	SIN	---	R		male	squash	Elvinn Keo	R
	female	table tennis	2011	Dec 2011	15	FAN Ying	CHN	---	R		male	squash	Eric Galvez	R
	female	table tennis	2011	Dec 2011	16	KIM Kyungah	KOR	---	R		male	squash	Esteban Casarino	R
	female	table tennis	2011	Dec 2011	17	LI Jiao	NED	---	L		male	squash	Evan Williams	R
	female	table tennis	2011	Dec 2011	18	WU Jiaduo	GER	---	R		male	squash	Fares Dessouki	R
	female	table tennis	2011	Dec 2011	19	SUN Beibei	SIN	---	R		male	squash	Farhan Mehboob	L
	female	table tennis	2011	Dec 2011	20	YANG Haeun	KOR	---	R		male	squash	Farhan Zaman	R
	female	table tennis	2011	Dec 2011	21	FENG Yalan	CHN	---	R		male	squash	Geoffrey Demont	R
	female	table tennis	2011	Dec 2011	22	WEN Jia	CHN	---	L		male	squash	Gilly Lane	R
	female	table tennis	2011	Dec 2011	23	ZHU Yuling	CHN	---	R		male	squash	Gonzalo Miranda	R
	female	table tennis	2011	Dec 2011	24	PARK Miyoung	KOR	---	R		male	squash	Greg Lobban	R
	female	table tennis	2011	Dec 2011	25	SEOK Hajung	KOR	---	R		male	squash	Gregoire Marche	R
	female	table tennis	2011	Dec 2011	26	LI Jie	NED	---	R		male	squash	Gregory Gaultier	R
	female	table tennis	2011	Dec 2011	27	JEON Jihee ^	KOR	---	L		male	squash	Harinder Pal Singh Sandhu	R
	female	table tennis	2011	Dec 2011	28	PAVLOVICH Viktoria	BLR	---	R		male	squash	Henrik Mustonen	R
	female	table tennis	2011	Dec 2011	29	FUJII Hiroko	JPN	---	R		male	squash	Hisham Mohd Ashour	R
	female	table tennis	2011	Dec 2011	30	LEE Eunhee	KOR	---	R		male	squash	Ivan Yuen	R
	female	table tennis	2011	Dec 2011	30	MOON Hyunjung	KOR	---	R		male	squash	James Huang	R
	female	table tennis	2011	Dec 2011	32	LI Qian	POL	---	R		male	squash	James Snell	R
	female	table tennis	2011	Dec 2011	33	YU Mengyu	SIN	---	R		male	squash	James Willstrop	R
	female	table tennis	2011	Dec 2011	34	SHEN Yanfei	ESP	---	L		male	squash	Jan Koukal	R
	female	table tennis	2011	Dec 2011	35	YANG Yang	CHN	---	R		male	squash	Jaymie Haycocks	R
	female	table tennis	2011	Dec 2011	36	SAMARA Elizabeta	ROU	---	L		male	squash	Jens Schoor	R
	female	table tennis	2011	Dec 2011	37	HUANG Yi-Hua	TPE	---	R		male	squash	Joe Lee	R
	female	table tennis	2011	Dec 2011	38	CHEN Meng	CHN	---	R		male	squash	Joel Hinds	R
	female	table tennis	2011	Dec 2011	39	ISHIGAKI Yuka	JPN	---	R		male	squash	Joey Barrington	R
	female	table tennis	2011	Dec 2011	40	NI Xialian	LUX	---	L		male	squash	John Rooney	R
	female	table tennis	2011	Dec 2011	41	SEO Hyowon	KOR	---	R		male	squash	Jonathan Kemp	L
	female	table tennis	2011	Dec 2011	42	DODEAN Daniela	ROU	---	R		male	squash	Jorge Isaac Baltazar Ferreira	R
	female	table tennis	2011	Dec 2011	43	POTA Georgina	HUN	---	R		male	squash	Julian Illingworth	R
	female	table tennis	2011	Dec 2011	44	IVANCAN Irene	GER	---	R		male	squash	Julien Balbo	R
	female	table tennis	2011	Dec 2011	45	HU Melek	TUR	---	R		male	squash	Kamran Khan	R
	female	table tennis	2011	Dec 2011	46	CHANG Chenchen	CHN	---	L		male	squash	Karim Abdel Gawad	R
	female	table tennis	2011	Dec 2011	46	MORIZONO Misaki	JPN	---	R		male	squash	Karim Ali Fathi	R
	female	table tennis	2011	Dec 2011	48	KIM Jong	PRK	---	L		male	squash	Karim Darwish	R
	female	table tennis	2011	Dec 2011	49	TOTH Krisztina	HUN	---	L		male	squash	Kashif Shuja	R
	female	table tennis	2011	Dec 2011	50	WAKAMIYA Misako	JPN	---	L		male	squash	Khawaja Adil Maqbool	R
	female	table tennis	2011	Dec 2011	51	CHENG I-Ching	TPE	---	R		male	squash	Kristian Frost Olesen	R
	female	table tennis	2011	Dec 2011	52	DANG Yeseo	KOR	---	R		male	squash	Laurence Delasaux	R
	female	table tennis	2011	Dec 2011	53	YOON Sunae	KOR	---	R		male	squash	Laurens Jan Anjema	L
	female	table tennis	2011	Dec 2011	54	SONG Maeum	KOR	---	R		male	squash	Leo Au	R
	female	table tennis	2011	Dec 2011	54	VACENOVSKA Iveta	CZE	---	R		male	squash	Lewis Walters	R
	female	table tennis	2011	Dec 2011	56	KANG Misoon ^	KOR	---	L		male	squash	Liam Kenny	R
	female	table tennis	2011	Dec 2011	57	LOVAS Petra	HUN	---	R		male	squash	Lucas Serme	R
	female	table tennis	2011	Dec 2011	58	WANG Xuan	CHN	---	R		male	squash	Mahesh Mangaonkar	R
	female	table tennis	2011	Dec 2011	59	WU Xue	DOM	---	L		male	squash	Mansoor Zaman	L
	female	table tennis	2011	Dec 2011	60	SILBEREISEN Kristin	GER	---	R		male	squash	Mark Krajcsak	R
	female	table tennis	2011	Dec 2011	61	GU Yuting	CHN	---	L		male	squash	Martin Knight	R
	female	table tennis	2011	Dec 2011	62	LI Xiaodan	CHN	---	R		male	squash	Marwan Elshorbagy	R
	female	table tennis	2011	Dec 2011	63	LI Xue ^	FRA	---	R		male	squash	Mathieu Castagnet	R
	female	table tennis	2011	Dec 2011	64	YI Fangxian ^^	USA	---	R		male	squash	Matthew Karwalski	R
	female	table tennis	2011	Dec 2011	65	PESOTSKA Margaryta	UKR	---	R		male	squash	Max Lee	R
	female	table tennis	2011	Dec 2011	66	LIU Jia	AUT	---	L		male	squash	Mazen Hesham	R
	female	table tennis	2011	Dec 2011	67	BARTHEL Zhenqi	GER	---	R		male	squash	Miguel Angel Rodriguez	R
	female	table tennis	2011	Dec 2011	67	ZHAO Yan	CHN	---	R		male	squash	Mike Corren	R
	female	table tennis	2011	Dec 2011	69	TIKHOMIROVA Anna	RUS	---	R		male	squash	Mohamed Abouelghar	R
	female	table tennis	2011	Dec 2011	70	EKHOLM Matilda	SWE	---	L		male	squash	Mohamed Elshorbagy	R
	female	table tennis	2011	Dec 2011	70	LEE I-Chen	TPE	---	L		male	squash	Mohamed Reda	R
	female	table tennis	2011	Dec 2011	72	TANIOKA Ayuka	JPN	---	R		male	squash	Mohammed Abbas	R
	female	table tennis	2011	Dec 2011	73	ZHANG Rui	HKG	---	R		male	squash	Mohd Azlan Iskandar	R
	female	table tennis	2011	Dec 2011	74	YAMANASHI Yuri	JPN	---	R		male	squash	Muhd Asyraf Azan	R
	female	table tennis	2011	Dec 2011	75	LEE Ho Ching	HKG	---	R		male	squash	Nafiizwan Adnan	R
	female	table tennis	2011	Dec 2011	76	MU Zi	CHN	---	R		male	squash	Nasir Iqbal	R
	female	table tennis	2011	Dec 2011	77	LI Qiangbing	AUT	---	R		male	squash	Nick Matthew	R
	female	table tennis	2011	Dec 2011	77	SCHALL Elke	GER	---	R		male	squash	Nicolas Mueller	R
	female	table tennis	2011	Dec 2011	79	NG Wing Nam	HKG	---	R		male	squash	Oliver Pett	R
	female	table tennis	2011	Dec 2011	80	SOLJA Petrissa	GER	---	L		male	squash	Olli Tuominen	R
	female	table tennis	2011	Dec 2011	81	FUKUOKA Haruna	JPN	---	R		male	squash	Omar Abdel Aziz	R
	female	table tennis	2011	Dec 2011	82	CHOI Moonyoung	KOR	---	R		male	squash	Omar Abdel Meguid	R
	female	table tennis	2011	Dec 2011	82	LAU Sui Fei	HKG	---	R		male	squash	Omar Mosaad	R
	female	table tennis	2011	Dec 2011	84	STRBIKOVA Renata	CZE	---	R		male	squash	Ong Beng Hee	R
	female	table tennis	2011	Dec 2011	85	ZHU Fang	ESP	---	R		male	squash	Paul Coll	R
	female	table tennis	2011	Dec 2011	86	PASKAUSKIENE Ruta	LTU	---	R		male	squash	Peter Barker	L
	female	table tennis	2011	Dec 2011	87	FADEEVA Oxana	RUS	---	R		male	squash	Peter Creed	R
	female	table tennis	2011	Dec 2011	88	RAO Jingwen	CHN	---	R		male	squash	Piedro Schweertman	L
	female	table tennis	2011	Dec 2011	89	HIURA Reiko	JPN	---	R		male	squash	Rafael Alarcon	R
	female	table tennis	2011	Dec 2011	90	ONO Shiho	JPN	---	R		male	squash	Ramy Ashour	R
	female	table tennis	2011	Dec 2011	91	FEHER Gabriela	SRB	---	R		male	squash	Raphael Kandra	L
	female	table tennis	2011	Dec 2011	92	CHEN Szu-Yu	TPE	---	R		male	squash	Rasmus Nielsen	R
	female	table tennis	2011	Dec 2011	93	GU Ruochen	CHN	---	R		male	squash	Reiko Peter	R
	female	table tennis	2011	Dec 2011	94	ERDELJI Ana-Maria	SRB	---	R		male	squash	Renan Lavigne	R
	female	table tennis	2011	Dec 2011	95	SZOCS Bernadette	ROU	---	R		male	squash	Rex Hedrick	R
	female	table tennis	2011	Dec 2011	96	GANINA Svetlana	RUS	---	R		male	squash	Richie Fallows	R
	female	table tennis	2011	Dec 2011	96	TIMINA Elena	NED	---	R		male	squash	Rob Sutherland	R
	female	table tennis	2011	Dec 2011	98	XIAN Yifang	FRA	---	R		male	squash	Robbie Temple	L
	female	table tennis	2011	Dec 2011	99	MADARASZ Dora	HUN	---	R		male	squash	Robertino Pezzota	R
	female	table tennis	2011	Dec 2011	100	CHE Xiaoxi	CHN	---	R		male	squash	Robin Clarke	R
	female	table tennis	2012	Dec 2012	1	DING Ning	CHN	---	L		male	squash	Ryan Cuskelly	L
	female	table tennis	2012	Dec 2012	2	LIU Shiwen	CHN	---	R		male	squash	Saurav Ghosal	R
	female	table tennis	2012	Dec 2012	3	LI Xiaoxia	CHN	---	R		male	squash	Scott Arnold	R
	female	table tennis	2012	Dec 2012	4	GUO Yan	CHN	---	R		male	squash	Sebastiaan Weenink	R
	female	table tennis	2012	Dec 2012	5	KIM Kyungah	KOR	---	R		male	squash	Shahier Razik	R
	female	table tennis	2012	Dec 2012	6	FENG Tianwei	SIN	---	R		male	squash	Shaun le Roux	R
	female	table tennis	2012	Dec 2012	6	FUKUHARA Ai	JPN	---	R		male	squash	Shawn Delierre	R
	female	table tennis	2012	Dec 2012	8	SHEN Yanfei	ESP	---	L		male	squash	Siddharth Suchde	R
	female	table tennis	2012	Dec 2012	9	ISHIKAWA Kasumi	JPN	---	L		male	squash	Simon Rösner	R
	female	table tennis	2012	Dec 2012	10	WU Yang	CHN	---	R		male	squash	Stephane Galifi	R
	female	table tennis	2012	Dec 2012	11	GUO Yue	CHN	---	L		male	squash	Stephen Coppinger	R
	female	table tennis	2012	Dec 2012	12	FENG Yalan	CHN	---	R		male	squash	Steven Finitsis	R
	female	table tennis	2012	Dec 2012	13	CHEN Meng	CHN	---	R		male	squash	Stewart Boswell	R
	female	table tennis	2012	Dec 2012	14	TIE Yana	HKG	---	R		male	squash	Tarek Momen	R
	female	table tennis	2012	Dec 2012	15	WANG Yuegu	SIN	---	R		male	squash	Tayyab Aslam	R
	female	table tennis	2012	Dec 2012	16	PAVLOVICH Viktoria	BLR	---	R		male	squash	Thierry Lincou	R
	female	table tennis	2012	Dec 2012	17	FAN Ying	CHN	---	R		male	squash	Todd Harrity	R
	female	table tennis	2012	Dec 2012	18	SAMARA Elizabeta	ROU	---	L		male	squash	Tom Ford	L
	female	table tennis	2012	Dec 2012	19	DANG Yeseo	KOR	---	R		male	squash	Tom Richards	R
	female	table tennis	2012	Dec 2012	20	JIANG Huajun	HKG	---	R		male	squash	Tsz Fung Yip	R
	female	table tennis	2012	Dec 2012	21	LI Jiawei	SIN	---	R		male	squash	Wade Johnstone	R
	female	table tennis	2012	Dec 2012	22	LI Jiao	NED	---	L		male	squash	Wael El Hindi	R
	female	table tennis	2012	Dec 2012	23	ZHU Yuling	CHN	---	R		male	squash	Waqar Mehboob	R
	female	table tennis	2012	Dec 2012	24	WU Jiaduo	GER	---	R		male	squash	Yann Perrin	R
	female	table tennis	2012	Dec 2012	25	LIU Jia	AUT	---	L		male	squash	Yasir Ali Butt	R
	female	table tennis	2012	Dec 2012	26	SEOK Hajung	KOR	---	R		male	squash	Yasser El Halaby	R
	female	table tennis	2012	Dec 2012	27	LI Qian	POL	---	R		male	squash	Zac Alexander	R
	female	table tennis	2012	Dec 2012	28	YANG Haeun	KOR	---	R		male	squash	Zahed Mohamed	R
	female	table tennis	2012	Dec 2012	29	VACENOVSKA Iveta	CZE	---	R		male	table tennis	ACHANTA Sharath Kamal	R
	female	table tennis	2012	Dec 2012	30	YU Mengyu	SIN	---	R		male	table tennis	ALAMIYAN Noshad	L
	female	table tennis	2012	Dec 2012	31	LI Jie	NED	---	R		male	table tennis	APOLONIA Tiago	R
	female	table tennis	2012	Dec 2012	31	PARK Miyoung	KOR	---	R		male	table tennis	ARUNA Quadri	R
	female	table tennis	2012	Dec 2012	31	WEN Jia	CHN	---	L		male	table tennis	ASSAR Omar	R
	female	table tennis	2012	Dec 2012	34	DODEAN Daniela	ROU	---	R		male	table tennis	BAI He ^	R
	female	table tennis	2012	Dec 2012	35	JEON Jihee ^	KOR	---	L		male	table tennis	BAUM Patrick	L
	female	table tennis	2012	Dec 2012	36	RI Myong Sun	PRK	---	R		male	table tennis	BENTSEN Allan	L
	female	table tennis	2012	Dec 2012	37	CHANG Chenchen	CHN	---	L		male	table tennis	BLASZCZYK Lucjan	R
	female	table tennis	2012	Dec 2012	37	HIRANO Sayaka	JPN	---	R		male	table tennis	BOBOCICA Mihai	R
	female	table tennis	2012	Dec 2012	39	LI Xiaodan	CHN	---	R		male	table tennis	BOLL Timo	L
	female	table tennis	2012	Dec 2012	40	SEO Hyowon	KOR	---	R		male	table tennis	CALDERANO Hugo	R
	female	table tennis	2012	Dec 2012	41	MOON Hyunjung	KOR	---	R		male	table tennis	CHAN Kazuhiro	L
	female	table tennis	2012	Dec 2012	42	HAN Ying	GER	---	R		male	table tennis	CHEN Chien-An	L
	female	table tennis	2012	Dec 2012	43	LEE Eunhee	KOR	---	R		male	table tennis	CHEN Feng ^	R
	female	table tennis	2012	Dec 2012	43	WAKAMIYA Misako	JPN	---	L		male	table tennis	CHEN Qi	L
	female	table tennis	2012	Dec 2012	45	HUANG Yi-Hua	TPE	---	R		male	table tennis	CHEN Weixing	R
	female	table tennis	2012	Dec 2012	46	SUN Beibei	SIN	---	R		male	table tennis	CHEUNG Yuk	L
	female	table tennis	2012	Dec 2012	47	LI Xue ^	FRA	---	R		male	table tennis	CHIANG Hung-Chieh	R
	female	table tennis	2012	Dec 2012	48	XIAN Yifang	FRA	---	R		male	table tennis	CHIANG Peng-Lung	R
	female	table tennis	2012	Dec 2012	49	SILBEREISEN Kristin	GER	---	R		male	table tennis	CHILA Patrick	L
	female	table tennis	2012	Dec 2012	50	KIM Jong	PRK	---	L		male	table tennis	CHO Eon Rae	R
	female	table tennis	2012	Dec 2012	51	POTA Georgina	HUN	---	R		male	table tennis	CHTCHETININE Evgueni	R
	female	table tennis	2012	Dec 2012	52	CHENG I-Ching	TPE	---	R		male	table tennis	CHUANG Chih-Yuan	R
	female	table tennis	2012	Dec 2012	53	EKHOLM Matilda	SWE	---	L		male	table tennis	CIOTI Constantin	R
	female	table tennis	2012	Dec 2012	54	IVANCAN Irene	GER	---	R		male	table tennis	CRISAN Adrian	R
	female	table tennis	2012	Dec 2012	55	LEE Ho Ching	HKG	---	R		male	table tennis	DRINKHALL Paul	R
	female	table tennis	2012	Dec 2012	55	TIKHOMIROVA Anna	RUS	---	R		male	table tennis	ELOI Damien	R
	female	table tennis	2012	Dec 2012	57	PESOTSKA Margaryta	UKR	---	R		male	table tennis	FAN Zhendong	R
	female	table tennis	2012	Dec 2012	58	NI Xialian	LUX	---	L		male	table tennis	FANG Bo	R
	female	table tennis	2012	Dec 2012	59	LOVAS Petra	HUN	---	R		male	table tennis	FEGERL Stefan	R
	female	table tennis	2012	Dec 2012	59	YAO Yan	CHN	---	R		male	table tennis	FEJER-KONNERTH Zoltan	R
	female	table tennis	2012	Dec 2012	61	PARTYKA Natalia	POL	---	L		male	table tennis	FILIMON Andrei	R
	female	table tennis	2012	Dec 2012	62	ZHAO Yan	CHN	---	R		male	table tennis	FILUS Ruwen	R
	female	table tennis	2012	Dec 2012	63	FUJII Hiroko	JPN	---	R		male	table tennis	FRANZ Peter	L
	female	table tennis	2012	Dec 2012	64	MORIZONO Misaki	JPN	---	R		male	table tennis	FRANZISKA Patrick	R
	female	table tennis	2012	Dec 2012	65	YOON Sunae	KOR	---	R		male	table tennis	FREITAS Marcos	L
	female	table tennis	2012	Dec 2012	66	RI Mi Gyong	PRK	---	L		male	table tennis	GACINA Andrej	R
	female	table tennis	2012	Dec 2012	67	BARTHEL Zhenqi	GER	---	R		male	table tennis	GAO Ning	R
	female	table tennis	2012	Dec 2012	67	LI Qiangbing	AUT	---	R		male	table tennis	GARDOS Robert	R
	female	table tennis	2012	Dec 2012	69	ISHIGAKI Yuka	JPN	---	R		male	table tennis	GAUZY Simon	R
	female	table tennis	2012	Dec 2012	70	GU Yuting	CHN	---	L		male	table tennis	GERELL Par	L
	female	table tennis	2012	Dec 2012	71	GAO Jun	USA	---	R		male	table tennis	GIONIS Panagiotis	R
	female	table tennis	2012	Dec 2012	72	CHEN Szu-Yu	TPE	---	R		male	table tennis	GORAK Daniel	R
	female	table tennis	2012	Dec 2012	73	LEE I-Chen	TPE	---	L		male	table tennis	HABESOHN Daniel	R
	female	table tennis	2012	Dec 2012	73	RAMIREZ Sara	ESP	---	R		male	table tennis	HAO Shuai	L
	female	table tennis	2012	Dec 2012	75	FUKUOKA Haruna	JPN	---	R		male	table tennis	HE Zhi Wen	L
	female	table tennis	2012	Dec 2012	76	LIU Gaoyang	CHN	---	L		male	table tennis	HENZELL William	R
	female	table tennis	2012	Dec 2012	77	GU Ruochen	CHN	---	R		male	table tennis	HIELSCHER Lars	R
	female	table tennis	2012	Dec 2012	78	CHOI Moonyoung	KOR	---	R		male	table tennis	HUANG Sheng-Sheng	L
	female	table tennis	2012	Dec 2012	79	TOTH Krisztina	HUN	---	L		male	table tennis	JAKAB Janos	R
	female	table tennis	2012	Dec 2012	80	PARK Youngsook	KOR	---	L		male	table tennis	JANG Song Man	R
	female	table tennis	2012	Dec 2012	80	SOLJA Amelie ^	AUT	---	R		male	table tennis	JANG Woojin	R
	female	table tennis	2012	Dec 2012	82	STRBIKOVA Renata	CZE	---	R		male	table tennis	JEONG Sangeun	R
	female	table tennis	2012	Dec 2012	83	SZOCS Bernadette	ROU	---	R		male	table tennis	JIANG Tianyi	L
	female	table tennis	2012	Dec 2012	84	NG Wing Nam	HKG	---	R		male	table tennis	JOO Saehyuk	R
	female	table tennis	2012	Dec 2012	85	SKOV Mie	DEN	---	R		male	table tennis	JUNG Youngsik	R
	female	table tennis	2012	Dec 2012	85	SOLJA Petrissa	GER	---	L		male	table tennis	KAN Yo	R
	female	table tennis	2012	Dec 2012	87	SHAN Xiaona ^	GER	---	R		male	table tennis	KARAKASEVIC Aleksandar	L
	female	table tennis	2012	Dec 2012	88	HSING Ariel	USA	---	R		male	table tennis	KARLSSON Kristian	L
	female	table tennis	2012	Dec 2012	89	ZHOU Yihan ^	SIN	---	R		male	table tennis	KASAHARA Hiromitsu	R
	female	table tennis	2012	Dec 2012	90	NONAKA Yuki	JPN	---	R		male	table tennis	KEEN Trinko	L
	female	table tennis	2012	Dec 2012	91	KANG Misoon ^	KOR	---	L		male	table tennis	KEINATH Thomas	R
	female	table tennis	2012	Dec 2012	92	KOMWONG Nanthana	THA	---	R		male	table tennis	KIM Donghyun	R
	female	table tennis	2012	Dec 2012	93	BILENKO Tetyana	UKR	---	R		male	table tennis	KIM Hyok Bong	R
	female	table tennis	2012	Dec 2012	93	TAN Wenling	ITA	---	R		male	table tennis	KIM Jung Hoon	R
	female	table tennis	2012	Dec 2012	95	RAO Jingwen	CHN	---	R		male	table tennis	KIM Minseok	R
	female	table tennis	2012	Dec 2012	95	YAMANASHI Yuri	JPN	---	R		male	table tennis	KISHIKAWA Seiya	R
	female	table tennis	2012	Dec 2012	97	BALAZOVA Barbora	SVK	---	L		male	table tennis	KO Lai Chak	L
	female	table tennis	2012	Dec 2012	97	FADEEVA Oxana	RUS	---	R		male	table tennis	KORBEL Petr	R
	female	table tennis	2012	Dec 2012	99	MOLNAR Cornelia	CRO	---	R		male	table tennis	KOSIBA Daniel	R
	female	table tennis	2012	Dec 2012	99	TANIOKA Ayuka	JPN	---	R		male	table tennis	KOSOWSKI Jakub	R
	female	table tennis	2013	Dec 2013	1	LIU Shiwen	CHN	---	R		male	table tennis	KOU Lei	R
	female	table tennis	2013	Dec 2013	2	DING Ning	CHN	---	L		male	table tennis	KREANGA Kalinikos	R
	female	table tennis	2013	Dec 2013	3	LI Xiaoxia	CHN	---	R		male	table tennis	KUZMIN Fedor	R
	female	table tennis	2013	Dec 2013	4	FENG Tianwei	SIN	---	R		male	table tennis	LASHIN El-Sayed	R
	female	table tennis	2013	Dec 2013	5	WU Yang	CHN	---	R		male	table tennis	LEBESSON Emmanuel	L
	female	table tennis	2013	Dec 2013	6	CHEN Meng	CHN	---	R		male	table tennis	LEE Jinkwon	R
	female	table tennis	2013	Dec 2013	7	ZHU Yuling	CHN	---	R		male	table tennis	LEE Jung Woo	L
	female	table tennis	2013	Dec 2013	8	GUO Yan	CHN	---	R		male	table tennis	LEE Jungsam	L
	female	table tennis	2013	Dec 2013	9	FUKUHARA Ai	JPN	---	R		male	table tennis	LEE Sangsu	R
	female	table tennis	2013	Dec 2013	10	ISHIKAWA Kasumi	JPN	---	L		male	table tennis	LEGOUT Christophe	L
	female	table tennis	2013	Dec 2013	11	GUO Yue	CHN	---	L		male	table tennis	LEI Zhenhua	R
	female	table tennis	2013	Dec 2013	12	SEO Hyowon	KOR	---	R		male	table tennis	LEUNG Chu Yan	R
	female	table tennis	2013	Dec 2013	13	SHEN Yanfei	ESP	---	L		male	table tennis	LI Ahmet ^	L
	female	table tennis	2013	Dec 2013	14	JIANG Huajun	HKG	---	R		male	table tennis	LI Ching	R
	female	table tennis	2013	Dec 2013	15	FENG Yalan	CHN	---	R		male	table tennis	LI Hu ^	R
	female	table tennis	2013	Dec 2013	16	LI Jiao	NED	---	L		male	table tennis	LI Kewei ^	R
	female	table tennis	2013	Dec 2013	17	KIM Kyungah	KOR	---	R		male	table tennis	LI Ping	R
	female	table tennis	2013	Dec 2013	17	PAVLOVICH Viktoria	BLR	---	R		male	table tennis	LIANG Jingkun	R
	female	table tennis	2013	Dec 2013	19	HAN Ying	GER	---	R		male	table tennis	LIM Jaehyun	R
	female	table tennis	2013	Dec 2013	20	YU Mengyu	SIN	---	R		male	table tennis	LIN Gaoyuan	L
	female	table tennis	2013	Dec 2013	21	SEOK Hajung	KOR	---	R		male	table tennis	LIN Ju	R
	female	table tennis	2013	Dec 2013	22	WEN Jia	CHN	---	L		male	table tennis	LIU Song	L
	female	table tennis	2013	Dec 2013	23	LEE Ho Ching	HKG	---	R		male	table tennis	LIU Yi	R
	female	table tennis	2013	Dec 2013	24	YANG Haeun	KOR	---	R		male	table tennis	LIVENTSOV Alexey	R
	female	table tennis	2013	Dec 2013	25	JEON Jihee ^	KOR	---	L		male	table tennis	LUNDQVIST Jens	R
	female	table tennis	2013	Dec 2013	26	HIRANO Sayaka	JPN	---	R		male	table tennis	MA Lin	R
	female	table tennis	2013	Dec 2013	27	SAMARA Elizabeta	ROU	---	L		male	table tennis	MA Long	R
	female	table tennis	2013	Dec 2013	28	CHENG I-Ching	TPE	---	R		male	table tennis	MACHADO Carlos	R
	female	table tennis	2013	Dec 2013	29	HU Limei	CHN	---	R		male	table tennis	MACHI Asuka	R
	female	table tennis	2013	Dec 2013	30	RI Myong Sun	PRK	---	R		male	table tennis	MATSUDAIRA Kenji	R
	female	table tennis	2013	Dec 2013	31	HU Melek	TUR	---	R		male	table tennis	MATSUDAIRA Kenta	R
	female	table tennis	2013	Dec 2013	32	LIU Jia	AUT	---	L		male	table tennis	MATSUMOTO Cazuo	L
	female	table tennis	2013	Dec 2013	33	LI Fen ^	SWE	---	R		male	table tennis	MATTENET Adrien	R
	female	table tennis	2013	Dec 2013	34	LI Xiaodan	CHN	---	R		male	table tennis	MAZE Michael	L
	female	table tennis	2013	Dec 2013	35	DANG Yeseo	KOR	---	R		male	table tennis	MENGEL Steffen	R
	female	table tennis	2013	Dec 2013	36	ZHAO Yan	CHN	---	R		male	table tennis	MIZUTANI Jun	L
	female	table tennis	2013	Dec 2013	37	MORIZONO Misaki	JPN	---	R		male	table tennis	MONTEIRO Joao	L
	female	table tennis	2013	Dec 2013	38	SHAN Xiaona ^	GER	---	R		male	table tennis	MONTEIRO Thiago	R
	female	table tennis	2013	Dec 2013	38	TIE Yana	HKG	---	R		male	table tennis	MORIZONO Masataka	L
	female	table tennis	2013	Dec 2013	40	LI Xue ^	FRA	---	R		male	table tennis	MURAMATSU Yuto	R
	female	table tennis	2013	Dec 2013	40	WU Jiaduo	GER	---	R		male	table tennis	NIWA Koki	L
	female	table tennis	2013	Dec 2013	42	VACENOVSKA Iveta	CZE	---	R		male	table tennis	OH Sang Eun	R
	female	table tennis	2013	Dec 2013	43	EKHOLM Matilda	SWE	---	L		male	table tennis	OSHIMA Yuya	R
	female	table tennis	2013	Dec 2013	44	HUANG Yi-Hua	TPE	---	R		male	table tennis	OVTCHAROV Dimitrij	R
	female	table tennis	2013	Dec 2013	45	SOLJA Petrissa	GER	---	L		male	table tennis	PATTANTYUS Adam	R
	female	table tennis	2013	Dec 2013	46	SILBEREISEN Kristin	GER	---	R		male	table tennis	PERSSON Jorgen	R
	female	table tennis	2013	Dec 2013	47	MOON Hyunjung	KOR	---	R		male	table tennis	PISTEJ Lubomir	R
	female	table tennis	2013	Dec 2013	48	RI Mi Gyong	PRK	---	L		male	table tennis	PITCHFORD Liam	R
	female	table tennis	2013	Dec 2013	49	MONTEIRO DODEAN Daniela	ROU	---	R		male	table tennis	PRIMORAC Zoran	R
	female	table tennis	2013	Dec 2013	50	ISHIGAKI Yuka	JPN	---	R		male	table tennis	PROKOPCOV Dmitrij	R
	female	table tennis	2013	Dec 2013	51	GU Yuting	CHN	---	L		male	table tennis	QIU Yike	R
	female	table tennis	2013	Dec 2013	51	LIU Gaoyang	CHN	---	L		male	table tennis	RI Chol Guk	R
	female	table tennis	2013	Dec 2013	51	PESOTSKA Margaryta	UKR	---	R		male	table tennis	ROBINOT Quentin	R
	female	table tennis	2013	Dec 2013	54	YU Fu ^	POR	---	R		male	table tennis	ROSSKOPF Jorg	L
	female	table tennis	2013	Dec 2013	55	POTA Georgina	HUN	---	R		male	table tennis	RUBTSOV Igor	R
	female	table tennis	2013	Dec 2013	56	NG Wing Nam	HKG	---	R		male	table tennis	RYU Seung Min	R
	female	table tennis	2013	Dec 2013	57	WAKAMIYA Misako	JPN	---	L		male	table tennis	SAIVE Jean-Michel	R
	female	table tennis	2013	Dec 2013	58	LEE I-Chen	TPE	---	L		male	table tennis	SAMSONOV Vladimir	R
	female	table tennis	2013	Dec 2013	59	KIM Jong	PRK	---	L		male	table tennis	SCHLAGER Werner	R
	female	table tennis	2013	Dec 2013	60	IVANCAN Irene	GER	---	R		male	table tennis	SEO Hyundeok	L
	female	table tennis	2013	Dec 2013	61	CHEN Szu-Yu	TPE	---	R		male	table tennis	SHANG Kun	L
	female	table tennis	2013	Dec 2013	61	SOLJA Amelie ^	AUT	---	R		male	table tennis	SHIBAEV Alexander	R
	female	table tennis	2013	Dec 2013	63	FUJII Hiroko	JPN	---	R		male	table tennis	SHIONO Masato	R
	female	table tennis	2013	Dec 2013	63	ITO Mima	JPN	---	R		male	table tennis	SHMYREV Maxim	R
	female	table tennis	2013	Dec 2013	65	GU Ruochen	CHN	---	R		male	table tennis	SIMONCIK Josef	R
	female	table tennis	2013	Dec 2013	66	BARTHEL Zhenqi	GER	---	R		male	table tennis	SKACHKOV Kirill	R
	female	table tennis	2013	Dec 2013	66	CHE Xiaoxi	CHN	---	R		male	table tennis	SMIRNOV Alexey	R
	female	table tennis	2013	Dec 2013	66	CHOI Moonyoung	KOR	---	R		male	table tennis	SONG Hongyuan	L
	female	table tennis	2013	Dec 2013	69	LIN Ye ^	SIN	---	R		male	table tennis	STEGER Bastian	R
	female	table tennis	2013	Dec 2013	70	BILENKO Tetyana	UKR	---	R		male	table tennis	STOYANOV Niagol	R
	female	table tennis	2013	Dec 2013	71	SZOCS Bernadette	ROU	---	R		male	table tennis	SUSS Christian	R
	female	table tennis	2013	Dec 2013	72	YOON Sunae	KOR	---	R		male	table tennis	SVENSSON Robert	L
	female	table tennis	2013	Dec 2013	73	PARK Youngsook	KOR	---	L		male	table tennis	TAKAKIWA Taku	R
	female	table tennis	2013	Dec 2013	74	ZHOU Yihan ^	SIN	---	R		male	table tennis	TAN Ruiwu	L
	female	table tennis	2013	Dec 2013	75	KATO Miyu	JPN	---	R		male	table tennis	TANG Peng	R
	female	table tennis	2013	Dec 2013	75	NONAKA Yuki	JPN	---	R		male	table tennis	TOKIC Bojan	R
	female	table tennis	2013	Dec 2013	77	DOO Hoi Kem	HKG	---	R		male	table tennis	TORIOLA Segun	R
	female	table tennis	2013	Dec 2013	78	HAMAMOTO Yui	JPN	---	R		male	table tennis	TOSIC Roko	L
	female	table tennis	2013	Dec 2013	78	HIRANO Miu	JPN	---	R		male	table tennis	TSUBOI Gustavo	L
	female	table tennis	2013	Dec 2013	80	LOVAS Petra	HUN	---	R		male	table tennis	TUGWELL Finn	R
	female	table tennis	2013	Dec 2013	80	MATSUDAIRA Shiho	JPN	---	R		male	table tennis	UEDA Jin	R
	female	table tennis	2013	Dec 2013	82	YANG Xiaoxin ^^	MON	---	R		male	table tennis	VANG Bora	R
	female	table tennis	2013	Dec 2013	83	WANG Xuan	CHN	---	R		male	table tennis	VLASOV Grigory	R
	female	table tennis	2013	Dec 2013	84	NI Xialian	LUX	---	L		male	table tennis	WALTHER Ricardo	R
	female	table tennis	2013	Dec 2013	85	LEE Eunhee	KOR	---	R		male	table tennis	WANG Eugene ^	R
	female	table tennis	2013	Dec 2013	86	XIAN Yifang	FRA	---	R		male	table tennis	WANG Hao	R
	female	table tennis	2013	Dec 2013	87	TIKHOMIROVA Anna	RUS	---	R		male	table tennis	WANG Liqin	R
	female	table tennis	2013	Dec 2013	88	MU Zi	CHN	---	R		male	table tennis	WANG Yang ^	R
	female	table tennis	2013	Dec 2013	89	SHENG Dandan	CHN	---	R		male	table tennis	WANG Zeng Yi	R
	female	table tennis	2013	Dec 2013	90	MATSUZAWA Marina	JPN	---	R		male	table tennis	WONG Chun Ting	R
	female	table tennis	2013	Dec 2013	91	KANG Misoon ^	KOR	---	L		male	table tennis	WOSIK Torben	L
	female	table tennis	2013	Dec 2013	92	STRBIKOVA Renata	CZE	---	R		male	table tennis	WU Chih-Chi	R
	female	table tennis	2013	Dec 2013	93	PARTYKA Natalia	POL	---	L		male	table tennis	XU Chenhao	R
	female	table tennis	2013	Dec 2013	94	FUKUOKA Haruna	JPN	---	R		male	table tennis	XU Xin	L
	female	table tennis	2013	Dec 2013	94	HSING Ariel	USA	---	R		male	table tennis	YAN An	R
	female	table tennis	2013	Dec 2013	94	MITTELHAM Nina	GER	---	R		male	table tennis	YANG Min	R
	female	table tennis	2013	Dec 2013	97	CHEN Xingtong	CHN	---	R		male	table tennis	YANG Zi	L
	female	table tennis	2013	Dec 2013	98	ZHANG Qiang	CHN	---	R		male	table tennis	YOON Jae Young	L
	female	table tennis	2013	Dec 2013	99	LIU Xi	CHN	---	R		male	table tennis	YOSHIDA Kaii	R
	female	table tennis	2013	Dec 2013	100	NOSKOVA Yana	RUS	---	R		male	table tennis	YOSHIDA Masaki	R
	female	table tennis	2014	Dec 2014	1	DING Ning	CHN	---	L		male	table tennis	YOSHIMURA Maharu	R
	female	table tennis	2014	Dec 2014	2	LIU Shiwen	CHN	---	R		male	table tennis	YU Ziyang	L
	female	table tennis	2014	Dec 2014	3	LI Xiaoxia	CHN	---	R		male	table tennis	ZHAI Yiming	R
	female	table tennis	2014	Dec 2014	4	FENG Tianwei	SIN	---	R		male	table tennis	ZHAN Jian ^	R
	female	table tennis	2014	Dec 2014	5	ZHU Yuling	CHN	---	R		male	table tennis	ZHANG Chao	R
	female	table tennis	2014	Dec 2014	6	ISHIKAWA Kasumi	JPN	---	L		male	table tennis	ZHANG Jike	R
	female	table tennis	2014	Dec 2014	7	WU Yang	CHN	---	R		male	table tennis	ZHMUDENKO Yaroslav	R
	female	table tennis	2014	Dec 2014	8	CHEN Meng	CHN	---	R		male	table tennis	ZHOU Qihao	R
	female	table tennis	2014	Dec 2014	9	HAN Ying	GER	---	R		male	table tennis	ZHOU Yu	L
	female	table tennis	2014	Dec 2014	10	FUKUHARA Ai	JPN	---	R		male	table tennis	ZWICKL Daniel	R
	female	table tennis	2014	Dec 2014	11	LIU Jia	AUT	---	L		male	tennis	Adrian Mannarino	L
	female	table tennis	2014	Dec 2014	12	SEO Hyowon	KOR	---	R		male	tennis	Adrian Ungur	R
	female	table tennis	2014	Dec 2014	13	YU Mengyu	SIN	---	R		male	tennis	Albert Montanes	R
	female	table tennis	2014	Dec 2014	14	FENG Yalan	CHN	---	R		male	tennis	Albert Ramos-Vinolas	L
	female	table tennis	2014	Dec 2014	15	LI Fen ^	SWE	---	R		male	tennis	Alejandro Falla	L
	female	table tennis	2014	Dec 2014	16	HIRANO Sayaka	JPN	---	R		male	tennis	Alejandro Gonzalez	R
	female	table tennis	2014	Dec 2014	17	LEE Ho Ching	HKG	---	R		male	tennis	Aleksandr Nedovyesov	R
	female	table tennis	2014	Dec 2014	18	POTA Georgina	HUN	---	R		male	tennis	Alex Bogomolov Jr.	R
	female	table tennis	2014	Dec 2014	19	SAMARA Elizabeta	ROU	---	L		male	tennis	Alexandr Dolgopolov	R
	female	table tennis	2014	Dec 2014	20	YU Fu ^	POR	---	R		male	tennis	Aljaz Bedene	R
	female	table tennis	2014	Dec 2014	21	SHAN Xiaona ^	GER	---	R		male	tennis	Andreas Beck	L
	female	table tennis	2014	Dec 2014	22	DOO Hoi Kem	HKG	---	R		male	tennis	Andreas Haider-Maurer	R
	female	table tennis	2014	Dec 2014	23	YANG Haeun	KOR	---	R		male	tennis	Andreas Seppi	R
	female	table tennis	2014	Dec 2014	24	LI Jiao	NED	---	L		male	tennis	Andrey Golubev	R
	female	table tennis	2014	Dec 2014	25	ISHIGAKI Yuka	JPN	---	R		male	tennis	Andrey Kuznetsov	R
	female	table tennis	2014	Dec 2014	26	HU Melek	TUR	---	R		male	tennis	Andy Murray	R
	female	table tennis	2014	Dec 2014	27	RI Myong Sun	PRK	---	R		male	tennis	Andy Roddick	R
	female	table tennis	2014	Dec 2014	28	HU Limei	CHN	---	R		male	tennis	Arnaud Clement	R
	female	table tennis	2014	Dec 2014	29	MORIZONO Misaki	JPN	---	R		male	tennis	Benjamin Becker	R
	female	table tennis	2014	Dec 2014	30	WU Jiaduo	GER	---	R		male	tennis	Benoit Paire	R
	female	table tennis	2014	Dec 2014	31	PAVLOVICH Viktoria	BLR	---	R		male	tennis	Bernard Tomic	R
	female	table tennis	2014	Dec 2014	32	JEON Jihee ^	KOR	---	L		male	tennis	Bjorn Phau	R
	female	table tennis	2014	Dec 2014	33	CHENG I-Ching	TPE	---	R		male	tennis	Blaz Kavcic	R
	female	table tennis	2014	Dec 2014	34	LIU Gaoyang	CHN	---	L		male	tennis	Blaz Rola	L
	female	table tennis	2014	Dec 2014	35	LI Jie	NED	---	R		male	tennis	Bradley Klahn	L
	female	table tennis	2014	Dec 2014	36	JIANG Huajun	HKG	---	R		male	tennis	Brian Baker	R
	female	table tennis	2014	Dec 2014	37	SOLJA Petrissa	GER	---	L		male	tennis	Brian Dabul	L
	female	table tennis	2014	Dec 2014	38	POLCANOVA Sofia	AUT	---	L		male	tennis	Carlos Berlocq	R
	female	table tennis	2014	Dec 2014	39	NG Wing Nam	HKG	---	R		male	tennis	Cedrik-Marcel Stebe	L
	female	table tennis	2014	Dec 2014	40	VACENOVSKA Iveta	CZE	---	R		male	tennis	Christophe Rochus	R
	female	table tennis	2014	Dec 2014	41	WAKAMIYA Misako	JPN	---	L		male	tennis	Daniel Brands	R
	female	table tennis	2014	Dec 2014	42	HIRANO Miu	JPN	---	R		male	tennis	Daniel Gimeno-Traver	R
	female	table tennis	2014	Dec 2014	43	LEE I-Chen	TPE	---	L		male	tennis	Daniel Koellerer	R
	female	table tennis	2014	Dec 2014	44	SILBEREISEN Kristin	GER	---	R		male	tennis	David Ferrer	R
	female	table tennis	2014	Dec 2014	45	IVANCAN Irene	GER	---	R		male	tennis	David Goffin	R
	female	table tennis	2014	Dec 2014	46	ITO Mima	JPN	---	R		male	tennis	David Nalbandian	R
	female	table tennis	2014	Dec 2014	47	PESOTSKA Margaryta	UKR	---	R		male	tennis	Denis Istomin	R
	female	table tennis	2014	Dec 2014	48	LIN Ye ^	SIN	---	R		male	tennis	Diego Schwartzman	R
	female	table tennis	2014	Dec 2014	49	CHEN Szu-Yu	TPE	---	R		male	tennis	Dmitry Tursunov	R
	female	table tennis	2014	Dec 2014	50	SATO Hitomi	JPN	---	R		male	tennis	Dominic Thiem	R
	female	table tennis	2014	Dec 2014	51	GU Yuting	CHN	---	L		male	tennis	Donald Young	L
	female	table tennis	2014	Dec 2014	52	LI Qian	POL	---	R		male	tennis	Dudi Sela	R
	female	table tennis	2014	Dec 2014	53	CHEN Xingtong	CHN	---	R		male	tennis	Dusan Lajovic	R
	female	table tennis	2014	Dec 2014	54	LI Xue ^	FRA	---	R		male	tennis	Dustin Brown	R
	female	table tennis	2014	Dec 2014	55	TIE Yana	HKG	---	R		male	tennis	Edouard Roger-Vasselin	R
	female	table tennis	2014	Dec 2014	56	WANG Manyu	CHN	---	R		male	tennis	Eduardo Schwank	R
	female	table tennis	2014	Dec 2014	57	YANG Xiaoxin ^^	MON	---	R		male	tennis	Eric Prodon	R
	female	table tennis	2014	Dec 2014	58	RI Mi Gyong	PRK	---	L		male	tennis	Ernests Gulbis	R
	female	table tennis	2014	Dec 2014	59	KATO Miyu	JPN	---	R		male	tennis	Evgeny Donskoy	R
	female	table tennis	2014	Dec 2014	60	ZHOU Yihan ^	SIN	---	R		male	tennis	Evgeny Korolev	R
	female	table tennis	2014	Dec 2014	61	WINTER Sabine	GER	---	R		male	tennis	Fabio Fognini	R
	female	table tennis	2014	Dec 2014	62	MIKHAILOVA Polina	RUS	---	R		male	tennis	Fabrice Santoro	R
	female	table tennis	2014	Dec 2014	63	HAYATA Hina	JPN	---	L		male	tennis	Federico Delbonis	L
	female	table tennis	2014	Dec 2014	63	SOLJA Amelie ^	AUT	---	R		male	tennis	Feliciano Lopez	L
	female	table tennis	2014	Dec 2014	65	SZOCS Bernadette	ROU	---	R		male	tennis	Fernando Gonzalez	R
	female	table tennis	2014	Dec 2014	66	PARTYKA Natalia	POL	---	L		male	tennis	Fernando Verdasco	L
	female	table tennis	2014	Dec 2014	67	EKHOLM Matilda	SWE	---	L		male	tennis	Filip Krajinovic	R
	female	table tennis	2014	Dec 2014	67	MAEDA Miyu	JPN	---	L		male	tennis	Filippo Volandri	R
	female	table tennis	2014	Dec 2014	69	PARK Youngsook	KOR	---	L		male	tennis	Flavio Cipolla	R
	female	table tennis	2014	Dec 2014	70	NONAKA Yuki	JPN	---	R		male	tennis	Florent Serra	R
	female	table tennis	2014	Dec 2014	71	KIM Jong	PRK	---	L		male	tennis	Florian Mayer	R
	female	table tennis	2014	Dec 2014	72	SUN Yingsha	CHN	---	R		male	tennis	Frederico Gil	R
	female	table tennis	2014	Dec 2014	73	EERLAND Britt	NED	---	R		male	tennis	Gael Monfils	R
	female	table tennis	2014	Dec 2014	73	NI Xialian	LUX	---	L		male	tennis	Gilles Muller	L
	female	table tennis	2014	Dec 2014	75	MADARASZ Dora	HUN	---	R		male	tennis	Gilles Simon	R
	female	table tennis	2014	Dec 2014	76	MORI Sakura	JPN	---	R		male	tennis	Go Soeda	R
	female	table tennis	2014	Dec 2014	76	YOO Eunchong	KOR	---	R		male	tennis	Grega Zemlja	R
	female	table tennis	2014	Dec 2014	78	LEE Eunhee	KOR	---	R		male	tennis	Grigor Dimitrov	R
	female	table tennis	2014	Dec 2014	79	GRZYBOWSKA Katarzyna	POL	---	R		male	tennis	Guido Pella	L
	female	table tennis	2014	Dec 2014	80	BARTHEL Zhenqi	GER	---	R		male	tennis	Guillaume Rufin	R
	female	table tennis	2014	Dec 2014	81	HAMAMOTO Yui	JPN	---	R		male	tennis	Guillermo Garcia-Lopez	R
	female	table tennis	2014	Dec 2014	81	POSTOACA Camelia	ROU	---	R		male	tennis	Horacio Zeballos	L
	female	table tennis	2014	Dec 2014	83	HUANG Yi-Hua	TPE	---	R		male	tennis	Igor Andreev	R
	female	table tennis	2014	Dec 2014	84	NOSKOVA Yana	RUS	---	R		male	tennis	Igor Kunitsyn	R
	female	table tennis	2014	Dec 2014	85	LIU Xin	CHN	---	L		male	tennis	Igor Sijsling	R
	female	table tennis	2014	Dec 2014	86	ABE Megumi	JPN	---	L		male	tennis	Illya Marchenko	R
	female	table tennis	2014	Dec 2014	87	MATSUZAWA Marina	JPN	---	R		male	tennis	Ivan Dodig	R
	female	table tennis	2014	Dec 2014	88	ZHU Chaohui	CHN	---	L		male	tennis	Ivan Ljubicic	R
	female	table tennis	2014	Dec 2014	89	TIAN Yuan	CRO	---	R		male	tennis	Ivo Karlovic	R
	female	table tennis	2014	Dec 2014	90	MATSUDAIRA Shiho	JPN	---	R		male	tennis	Jack Sock	R
	female	table tennis	2014	Dec 2014	90	PASKAUSKIENE Ruta	LTU	---	R		male	tennis	James Blake	R
	female	table tennis	2014	Dec 2014	92	STRBIKOVA Renata	CZE	---	R		male	tennis	Jan Hajek	R
	female	table tennis	2014	Dec 2014	93	BILENKO Tetyana	UKR	---	R		male	tennis	Janko Tipsarevic	R
	female	table tennis	2014	Dec 2014	94	CHOI Moonyoung	KOR	---	R		male	tennis	Jan-Lennard Struff	R
	female	table tennis	2014	Dec 2014	95	GRUNDISCH Carole	FRA	---	R		male	tennis	Jarkko Nieminen	L
	female	table tennis	2014	Dec 2014	96	ZHANG Lily	USA	---	R		male	tennis	Jeremy Chardy	R
	female	table tennis	2014	Dec 2014	97	HE Zhuojia	CHN	---	R		male	tennis	Jerzy Janowicz	R
	female	table tennis	2014	Dec 2014	97	LOVAS Petra	HUN	---	R		male	tennis	Jiri Vesely	L
	female	table tennis	2014	Dec 2014	99	DOLGIKH Maria	RUS	---	R		male	tennis	Joao Sousa	R
	female	table tennis	2014	Dec 2014	100	TASHIRO Saki	JPN	---	R		male	tennis	Joao Souza	R
	female	tennis	2009	2009-12-28	1	Serena Williams	USA	---	R		male	tennis	John Isner	R
	female	tennis	2009	2009-12-28	2	Dinara Safina	RUS	---	R		male	tennis	Jose Acasuso	R
	female	tennis	2009	2009-12-28	3	Svetlana Kuznetsova	RUS	---	R		male	tennis	Jo-Wilfried Tsonga	R
	female	tennis	2009	2009-12-28	4	Caroline Wozniacki	DEN	---	R		male	tennis	Juan Carlos Ferrero	R
	female	tennis	2009	2009-12-28	5	Elena Dementieva	RUS	---	R		male	tennis	Juan Ignacio Chela	R
	female	tennis	2009	2009-12-28	6	Venus Williams	USA	---	R		male	tennis	Juan Martin Del Potro	R
	female	tennis	2009	2009-12-28	7	Victoria Azarenka	BLR	---	R		male	tennis	Juan Monaco	R
	female	tennis	2009	2009-12-28	8	Jelena Jankovic	SRB	---	R		male	tennis	Julian Reister	R
	female	tennis	2009	2009-12-28	9	Vera Zvonareva	RUS	---	R		male	tennis	Julien Benneteau	R
	female	tennis	2009	2009-12-28	10	Agnieszka Radwanska	POL	---	R		male	tennis	Jurgen Melzer	L
	female	tennis	2009	2009-12-28	11	Marion Bartoli	FRA	---	R		male	tennis	Jurgen Zopp	R
	female	tennis	2009	2009-12-28	12	Flavia Pennetta	ITA	---	R		male	tennis	Kei Nishikori	R
	female	tennis	2009	2009-12-28	13	Samantha Stosur	AUS	---	R		male	tennis	Kenny De Schepper	L
	female	tennis	2009	2009-12-28	14	Maria Sharapova	RUS	---	R		male	tennis	Kevin Anderson	R
	female	tennis	2009	2009-12-28	15	Na Li	CHN	---	R		male	tennis	Leonardo Mayer	R
	female	tennis	2009	2009-12-28	16	Yanina Wickmayer	BEL	---	R		male	tennis	Lleyton Hewitt	R
	female	tennis	2009	2009-12-28	17	Francesca Schiavone	ITA	---	R		male	tennis	Lukas Lacko	L
	female	tennis	2009	2009-12-28	18	Kim Clijsters	BEL	---	R		male	tennis	Lukas Rosol	R
	female	tennis	2009	2009-12-28	19	Virginie Razzano	FRA	---	R		male	tennis	Lukasz Kubot	R
	female	tennis	2009	2009-12-28	20	Nadia Petrova	RUS	---	R		male	tennis	Malek Jaziri	R
	female	tennis	2009	2009-12-28	21	Amelie Mauresmo	FRA	---	R		male	tennis	Marc Gicquel	R
	female	tennis	2009	2009-12-28	22	Ana Ivanovic	SRB	---	R		male	tennis	Marcel Granollers	R
	female	tennis	2009	2009-12-28	23	Sabine Lisicki	GER	---	R		male	tennis	Marco Chiudinelli	R
	female	tennis	2009	2009-12-28	24	Elena Vesnina	RUS	---	R		male	tennis	Marcos Baghdatis	R
	female	tennis	2009	2009-12-28	25	Daniela Hantuchova	SVK	---	R		male	tennis	Marcos Daniel	R
	female	tennis	2009	2009-12-28	26	Aravane Rezai	FRA	---	R		male	tennis	Mardy Fish	R
	female	tennis	2009	2009-12-28	27	Maria Jose Martinez Sanchez	ESP	---	L		male	tennis	Marin Cilic	R
	female	tennis	2009	2009-12-28	28	Anabel Medina Garrigues	ESP	---	R		male	tennis	Marinko Matosevic	R
	female	tennis	2009	2009-12-28	29	Alisa Kleybanova	RUS	---	R		male	tennis	Mario Ancic	R
	female	tennis	2009	2009-12-28	30	Dominika Cibulkova	SVK	---	R		male	tennis	Marsel Ilhan	R
	female	tennis	2009	2009-12-28	31	Shahar Peer	ISR	---	R		male	tennis	Martin Klizan	L
	female	tennis	2009	2009-12-28	32	Kateryna Bondarenko	UKR	---	R		male	tennis	Martin Vassallo Arguello	R
	female	tennis	2009	2009-12-28	33	Alona Bondarenko	UKR	---	R		male	tennis	Matthew Ebden	R
	female	tennis	2009	2009-12-28	34	Carla Suarez Navarro	ESP	---	R		male	tennis	Matthias Bachinger	R
	female	tennis	2009	2009-12-28	35	Aleksandra Wozniak	CAN	---	R		male	tennis	Maximo Gonzalez	R
	female	tennis	2009	2009-12-28	36	Jie Zheng	CHN	---	R		male	tennis	Michael Berrer	L
	female	tennis	2009	2009-12-28	37	Gisela Dulko	ARG	---	R		male	tennis	Michael Llodra	L
	female	tennis	2009	2009-12-28	38	Melinda Czink	HUN	---	L		male	tennis	Michael Russell	R
	female	tennis	2009	2009-12-28	39	Iveta Benesova	CZE	---	L		male	tennis	Michal Przysiezny	R
	female	tennis	2009	2009-12-28	40	Agnes Szavay	HUN	---	R		male	tennis	Mikhail Kukushkin	R
	female	tennis	2009	2009-12-28	41	Anastasia Pavlyuchenkova	RUS	---	R		male	tennis	Mikhail Youzhny	R
	female	tennis	2009	2009-12-28	42	Lucie Safarova	CZE	---	L		male	tennis	Milos Raonic	R
	female	tennis	2009	2009-12-28	43	Patty Schnyder	SUI	---	L		male	tennis	Mischa Zverev	L
	female	tennis	2009	2009-12-28	44	Vera Dushevina	RUS	---	R		male	tennis	Nick Kyrgios	R
	female	tennis	2009	2009-12-28	45	Magdalena Rybarikova	SVK	---	R		male	tennis	Nicolas Almagro	R
	female	tennis	2009	2009-12-28	46	Sorana Cirstea	ROU	---	R		male	tennis	Nicolas Lapentti	R
	female	tennis	2009	2009-12-28	47	Shuai Peng	CHN	---	R		male	tennis	Nicolas Mahut	R
	female	tennis	2009	2009-12-28	48	Sara Errani	ITA	---	R		male	tennis	Nikolay Davydenko	R
	female	tennis	2009	2009-12-28	49	Melanie Oudin	USA	---	R		male	tennis	Novak Djokovic	R
	female	tennis	2009	2009-12-28	50	Alize Cornet	FRA	---	R		male	tennis	Olivier Rochus	R
	female	tennis	2009	2009-12-28	51	Alexandra Dulgheru	ROU	---	R		male	tennis	Oscar Hernandez	R
	female	tennis	2009	2009-12-28	52	Olga Govortsova	BLR	---	R		male	tennis	Pablo Andujar	R
	female	tennis	2009	2009-12-28	53	Yaroslava Shvedova	KAZ	---	R		male	tennis	Pablo Carreno Busta	R
	female	tennis	2009	2009-12-28	54	Timea Bacsinszky	SUI	---	R		male	tennis	Pablo Cuevas	R
	female	tennis	2009	2009-12-28	55	Sybille Bammer	AUT	---	L		male	tennis	Paolo Lorenzi	R
	female	tennis	2009	2009-12-28	56	Andrea Petkovic	GER	---	R		male	tennis	Paul-Henri Mathieu	R
	female	tennis	2009	2009-12-28	57	Jelena Dokic	AUS	---	R		male	tennis	Pere Riba	R
	female	tennis	2009	2009-12-28	58	Sania Mirza	IND	---	R		male	tennis	Peter Gojowczyk	R
	female	tennis	2009	2009-12-28	59	Tathiana Garbin	ITA	---	R		male	tennis	Peter Luczak	R
	female	tennis	2009	2009-12-28	60	Ekaterina Makarova	RUS	---	L		male	tennis	Philipp Kohlschreiber	R
	female	tennis	2009	2009-12-28	61	Kaia Kanepi	EST	---	R		male	tennis	Philipp Petzschner	R
	female	tennis	2009	2009-12-28	62	Petra Kvitova	CZE	---	L		male	tennis	Potito Starace	R
	female	tennis	2009	2009-12-28	63	Maria Kirilenko	RUS	---	R		male	tennis	Radek Stepanek	R
	female	tennis	2009	2009-12-28	64	Roberta Vinci	ITA	---	R		male	tennis	Rafael Nadal	L
	female	tennis	2009	2009-12-28	65	Lucie Hradecka	CZE	---	R		male	tennis	Rainer Schuettler	R
	female	tennis	2009	2009-12-28	66	Urszula Radwanska	POL	---	R		male	tennis	Rajeev Ram	R
	female	tennis	2009	2009-12-28	67	Anna-Lena Groenefeld	GER	---	R		male	tennis	Ricardas Berankis	R
	female	tennis	2009	2009-12-28	68	Tatjana Malek	GER	---	R		male	tennis	Ricardo Mello	L
	female	tennis	2009	2009-12-28	69	Barbora Zahlavova Strycova	CZE	---	R		male	tennis	Richard Gasquet	R
	female	tennis	2009	2009-12-28	70	Anna Chakvetadze	RUS	---	R		male	tennis	Robby Ginepri	R
	female	tennis	2009	2009-12-28	71	Polona Hercog	SLO	---	R		male	tennis	Roberto Bautista Agut	R
	female	tennis	2009	2009-12-28	72	Ayumi Morita	JPN	---	R		male	tennis	Robin Haase	R
	female	tennis	2009	2009-12-28	73	Ioana Raluca Olaru	ROU	---	R		male	tennis	Robin Soderling	R
	female	tennis	2009	2009-12-28	74	Alberta Brianti	ITA	---	R		male	tennis	Roger Federer	R
	female	tennis	2009	2009-12-28	75	Julie Coin	FRA	---	R		male	tennis	Ruben Ramirez Hidalgo	R
	female	tennis	2009	2009-12-28	76	Stefanie Voegele	SUI	---	R		male	tennis	Rui Machado	R
	female	tennis	2009	2009-12-28	77	Jill Craybas	USA	---	R		male	tennis	Ryan Harrison	R
	female	tennis	2009	2009-12-28	78	Julia Goerges	GER	---	R		male	tennis	Ryan Sweeting	R
	female	tennis	2009	2009-12-28	79	Vania King	USA	---	R		male	tennis	Sam Groth	R
	female	tennis	2009	2009-12-28	80	Kristina Barrois	GER	---	R		male	tennis	Sam Querrey	R
	female	tennis	2009	2009-12-28	81	Kirsten Flipkens	BEL	---	R		male	tennis	Santiago Giraldo	R
	female	tennis	2009	2009-12-28	82	Kimiko Date Krumm	JPN	---	R		male	tennis	Sergiy Stakhovsky	R
	female	tennis	2009	2009-12-28	83	Anastasija Sevastova	LAT	---	R		male	tennis	Simon Greul	R
	female	tennis	2009	2009-12-28	84	Petra Martic	CRO	---	R		male	tennis	Simone Bolelli	R
	female	tennis	2009	2009-12-28	85	Akgul Amanmuradova	UZB	---	R		male	tennis	Somdev Devvarman	R
	female	tennis	2009	2009-12-28	86	Patricia Mayr	AUT	---	R		male	tennis	Stanislas Wawrinka	R
	female	tennis	2009	2009-12-28	87	Viktoriya Kutuzova	UKR	---	R		male	tennis	Steve Darcis	R
	female	tennis	2009	2009-12-28	88	Katie O'Brien	GBR	---	R		male	tennis	Steve Johnson	R
	female	tennis	2009	2009-12-28	89	Elena Baltacha	GBR	---	R		male	tennis	Tatsuma Ito	R
	female	tennis	2009	2009-12-28	90	Alla Kudryavtseva	RUS	---	R		male	tennis	Taylor Dent	R
	female	tennis	2009	2009-12-28	91	Arantxa Parra Santonja	ESP	---	R		male	tennis	Teymuraz Gabashvili	R
	female	tennis	2009	2009-12-28	92	Kai-Chen Chang	TPE	---	R		male	tennis	Thiemo de Bakker	R
	female	tennis	2009	2009-12-28	93	Edina Gallovits	ROU	---	R		male	tennis	Thomaz Bellucci	L
	female	tennis	2009	2009-12-28	94	Yung-Jan Chan	TPE	---	R		male	tennis	Tim Smyczek	R
	female	tennis	2009	2009-12-28	95	Klara Zakopalova	CZE	---	R		male	tennis	Tobias Kamke	R
	female	tennis	2009	2009-12-28	96	Karolina Sprem	CRO	---	R		male	tennis	Tomas Berdych	R
	female	tennis	2009	2009-12-28	97	Anastasia Rodionova	RUS	---	R		male	tennis	Tommy Haas	R
	female	tennis	2009	2009-12-28	98	Anastasiya Yakimova	BLR	---	R		male	tennis	Tommy Robredo	R
	female	tennis	2009	2009-12-28	99	Tsvetana Pironkova	BUL	---	R		male	tennis	Vasek Pospisil	R
	female	tennis	2009	2009-12-28	100	Anne Keothavong	GBR	---	R		male	tennis	Victor Estrella Burgos	R
	female	tennis	2010	2010-12-27	1	Caroline Wozniacki	DEN	---	R		male	tennis	Victor Hanescu	R
	female	tennis	2010	2010-12-27	2	Vera Zvonareva	RUS	---	R		male	tennis	Viktor Troicki	R
	female	tennis	2010	2010-12-27	3	Kim Clijsters	BEL	---	R		male	tennis	Xavier Malisse	R
	female	tennis	2010	2010-12-27	4	Serena Williams	USA	---	R		male	tennis	Yen-Hsun Lu	R
	female	tennis	2010	2010-12-27	5	Venus Williams	USA	---	R
	female	tennis	2010	2010-12-27	6	Samantha Stosur	AUS	---	R
	female	tennis	2010	2010-12-27	7	Francesca Schiavone	ITA	---	R
	female	tennis	2010	2010-12-27	8	Jelena Jankovic	SRB	---	R
	female	tennis	2010	2010-12-27	9	Elena Dementieva	RUS	---	R
	female	tennis	2010	2010-12-27	10	Victoria Azarenka	BLR	---	R
	female	tennis	2010	2010-12-27	11	Na Li	CHN	---	R
	female	tennis	2010	2010-12-27	12	Justine Henin	BEL	---	R
	female	tennis	2010	2010-12-27	13	Shahar Peer	ISR	---	R
	female	tennis	2010	2010-12-27	14	Agnieszka Radwanska	POL	---	R
	female	tennis	2010	2010-12-27	15	Nadia Petrova	RUS	---	R
	female	tennis	2010	2010-12-27	16	Marion Bartoli	FRA	---	R
	female	tennis	2010	2010-12-27	17	Ana Ivanovic	SRB	---	R
	female	tennis	2010	2010-12-27	18	Maria Sharapova	RUS	---	R
	female	tennis	2010	2010-12-27	19	Aravane Rezai	FRA	---	R
	female	tennis	2010	2010-12-27	20	Maria Kirilenko	RUS	---	R
	female	tennis	2010	2010-12-27	21	Anastasia Pavlyuchenkova	RUS	---	R
	female	tennis	2010	2010-12-27	22	Kaia Kanepi	EST	---	R
	female	tennis	2010	2010-12-27	23	Yanina Wickmayer	BEL	---	R
	female	tennis	2010	2010-12-27	24	Flavia Pennetta	ITA	---	R
	female	tennis	2010	2010-12-27	25	Alisa Kleybanova	RUS	---	R
	female	tennis	2010	2010-12-27	26	Jie Zheng	CHN	---	R
	female	tennis	2010	2010-12-27	27	Svetlana Kuznetsova	RUS	---	R
	female	tennis	2010	2010-12-27	28	Maria Jose Martinez Sanchez	ESP	---	L
	female	tennis	2010	2010-12-27	29	Alexandra Dulgheru	ROU	---	R
	female	tennis	2010	2010-12-27	30	Daniela Hantuchova	SVK	---	R
	female	tennis	2010	2010-12-27	31	Dominika Cibulkova	SVK	---	R
	female	tennis	2010	2010-12-27	32	Andrea Petkovic	GER	---	R
	female	tennis	2010	2010-12-27	33	Lucie Safarova	CZE	---	L
	female	tennis	2010	2010-12-27	34	Petra Kvitova	CZE	---	L
	female	tennis	2010	2010-12-27	35	Tsvetana Pironkova	BUL	---	R
	female	tennis	2010	2010-12-27	36	Alona Bondarenko	UKR	---	R
	female	tennis	2010	2010-12-27	37	Agnes Szavay	HUN	---	R
	female	tennis	2010	2010-12-27	38	Roberta Vinci	ITA	---	R
	female	tennis	2010	2010-12-27	39	Yaroslava Shvedova	KAZ	---	R
	female	tennis	2010	2010-12-27	40	Julia Goerges	GER	---	R
	female	tennis	2010	2010-12-27	41	Klara Zakopalova	CZE	---	R
	female	tennis	2010	2010-12-27	42	Jarmila Groth	AUS	---	R
	female	tennis	2010	2010-12-27	43	Sara Errani	ITA	---	R
	female	tennis	2010	2010-12-27	44	Patty Schnyder	SUI	---	L
	female	tennis	2010	2010-12-27	45	Anastasija Sevastova	LAT	---	R
	female	tennis	2010	2010-12-27	46	Kimiko Date Krumm	JPN	---	R
	female	tennis	2010	2010-12-27	47	Angelique Kerber	GER	---	L
	female	tennis	2010	2010-12-27	48	Polona Hercog	SLO	---	R
	female	tennis	2010	2010-12-27	49	Gisela Dulko	ARG	---	R
	female	tennis	2010	2010-12-27	50	Ekaterina Makarova	RUS	---	L
	female	tennis	2010	2010-12-27	51	Timea Bacsinszky	SUI	---	R
	female	tennis	2010	2010-12-27	52	Sofia Arvidsson	SWE	---	R
	female	tennis	2010	2010-12-27	53	Elena Vesnina	RUS	---	R
	female	tennis	2010	2010-12-27	54	Vera Dushevina	RUS	---	R
	female	tennis	2010	2010-12-27	55	Elena Baltacha	GBR	---	R
	female	tennis	2010	2010-12-27	56	Anna Chakvetadze	RUS	---	R
	female	tennis	2010	2010-12-27	57	Carla Suarez Navarro	ESP	---	R
	female	tennis	2010	2010-12-27	58	Tamarine Tanasugarn	THA	---	R
	female	tennis	2010	2010-12-27	59	Bethanie Mattek-Sands	USA	---	R
	female	tennis	2010	2010-12-27	60	Iveta Benesova	CZE	---	L
	female	tennis	2010	2010-12-27	61	Alla Kudryavtseva	RUS	---	R
	female	tennis	2010	2010-12-27	62	Dinara Safina	RUS	---	R
	female	tennis	2010	2010-12-27	63	Anastasia Rodionova	AUS	---	R
	female	tennis	2010	2010-12-27	64	Arantxa Parra Santonja	ESP	---	R
	female	tennis	2010	2010-12-27	65	Melanie Oudin	USA	---	R
	female	tennis	2010	2010-12-27	66	Romina Oprandi	ITA	---	R
	female	tennis	2010	2010-12-27	67	Barbora Zahlavova Strycova	CZE	---	R
	female	tennis	2010	2010-12-27	68	Johanna Larsson	SWE	---	R
	female	tennis	2010	2010-12-27	69	Akgul Amanmuradova	UZB	---	R
	female	tennis	2010	2010-12-27	70	Sybille Bammer	AUT	---	L
	female	tennis	2010	2010-12-27	71	Bojana Jovanovski	SRB	---	R
	female	tennis	2010	2010-12-27	72	Shuai Peng	CHN	---	R
	female	tennis	2010	2010-12-27	73	Anabel Medina Garrigues	ESP	---	R
	female	tennis	2010	2010-12-27	74	Olga Govortsova	BLR	---	R
	female	tennis	2010	2010-12-27	75	Edina Gallovits	ROU	---	R
	female	tennis	2010	2010-12-27	76	Ayumi Morita	JPN	---	R
	female	tennis	2010	2010-12-27	77	Kirsten Flipkens	BEL	---	R
	female	tennis	2010	2010-12-27	78	Alize Cornet	FRA	---	R
	female	tennis	2010	2010-12-27	79	Varvara Lepchenko	USA	---	L
	female	tennis	2010	2010-12-27	80	Kristina Barrois	GER	---	R
	female	tennis	2010	2010-12-27	81	Simona Halep	ROU	---	R
	female	tennis	2010	2010-12-27	82	Renata Voracova	CZE	---	R
	female	tennis	2010	2010-12-27	83	Monica Niculescu	ROU	---	R
	female	tennis	2010	2010-12-27	84	Zuzana Ondraskova	CZE	---	R
	female	tennis	2010	2010-12-27	85	Lourdes Dominguez Lino	ESP	---	R
	female	tennis	2010	2010-12-27	86	Vania King	USA	---	R
	female	tennis	2010	2010-12-27	87	Tathiana Garbin	ITA	---	R
	female	tennis	2010	2010-12-27	88	Greta Arn	HUN	---	R
	female	tennis	2010	2010-12-27	89	Sandra Zahlavova	CZE	---	R
	female	tennis	2010	2010-12-27	90	Tamira Paszek	AUT	---	R
	female	tennis	2010	2010-12-27	91	Shuai Zhang	CHN	---	R
	female	tennis	2010	2010-12-27	92	Alberta Brianti	ITA	---	R
	female	tennis	2010	2010-12-27	93	Regina Kulikova	RUS	---	R
	female	tennis	2010	2010-12-27	94	Yvonne Meusburger	AUT	---	R
	female	tennis	2010	2010-12-27	95	Sorana Cirstea	ROU	---	R
	female	tennis	2010	2010-12-27	96	Karolina Sprem	CRO	---	R
[truncated: 3,925 more rows]

## Sheet: Time Intervals
Loffing, F.: Left-handedness and time pressure in elite interactive ball games @ Biology Letters
Summary statistics on the time intervals between two interacting players' actions in the ball games
(obtained from professional men's competition)
	sport	n	time between interacting players' actions (in ms)
			min	max	Md	M	SD	SE	95%-CI
	badminton	1569	220	2360	840	883.238	327.727	8.27371	16.2287
	squash	1976	540	2760	1280	1403.8	422.744	9.51008	18.6508
	table tennis	778	240	1480	620	604.55	183.915	6.59368	12.9435
	tennis	1941	320	4066.67	1150	1174.52	400.033	9.07993	17.8075
	cricket (bowler)	5652	381.542	1082.71	511.202	555.657	105.371	1.40159	2.74765
	baseball (pitcher)	706374	---	---	n/a	419.27	---	0.125373	---
	For details, please see the following three spreadsheets that are also included in this file:
	RacketSports_VideoAnalyses
	Cricket__BowlSpeed
	Baseball__PitchSpeed

## Sheet: RacketSports_VideoAnalyses
Loffing, F.: Left-handedness and time pressure in elite interactive ball games @ Biology Letters
Frame-by-frame video analyses of professional matches in tennis, table tennis, badminton and squash
	Frame-by-frame data
	sport	surface	match no.	set	rally_no	shot_no	videoframe	ms_per_frame	TimeLag
	badminton		1	1	1	1	1185	40
	badminton		1	1	1	2	1201	40	640			Professional matches analysed
	badminton		1	1	1	3	1222	40	840			sport	surface	winner vs. loser	match	result
	badminton		1	1	1	4	1259	40	1480			badminton	---	Chen Long vs. Lee Chong Wie	World Cup 2014, Copenhagen (final)	21-19, 21-19
	badminton		1	1	1	5	1274	40	600				---	Viktor Axelsen vs. H.S. Prannoy	World Cup 2015, Jakarta (round 3)	21-16, 19-21, 21-18
	badminton		1	1	1	6	1293	40	760				---	Nguyen Tien Minh vs. Kashyap Parupalli	World Cup 2015, Jakarta (round 2)	17-21, 21-13, 21-18
	badminton		1	1	1	7	1314	40	840				---	Kento Momota vs. Martin Guiffre	World Cup 2015, Jakarta (round 2)	21-14, 21-9
	badminton		1	1	1	8	1335	40	840				---	Lin Dan vs. Hans Kristian Vittinghus	World Cup 2015, Jakarta (round 3)	21-9, 21-13
	badminton		1	1	1	9	1376	40	1640			squash	---	Miguel A. Rodriguez vs. Gregory Gaultier	Quarterfinal of the 2015 Tournament of Champions	11-13, 14-12, 8-11, 11-8, 11-9
	badminton		1	1	1	10	1396	40	800				---	Amr Shabana vs. Nick Matthew	Tournament of Champions 2014, New York (quarterfinal)	9-11, 10-12, 11-7, 2-11, 11-9
	badminton		1	1	2	1	1984	40					---	Ramy Ashour vs. James Willstrop	British Open 2012, London (semifinal)	8-11, 11-6, 11-6, 11-8
	badminton		1	1	2	2	2000	40	640				---	Nick Matthew vs. Mohamed Elshorbagy	British Open 2014, London (semifinal)	4-11, 12-10, 3-11, 11-7, 11-8
	badminton		1	1	2	3	2020	40	800				---	Ramy Ashour vs. Mohamed Elshorbagy	World Championships 2014, Doha (final)	13-11, 7-11, 5-11, 11-5, 14-12
	badminton		1	1	2	4	2055	40	1400			table tennis	---	Jike Zhang vs. Long Ma	Final of the 2014 World Cup	8-11, 11-4, 13-11, 7-11, 2-11, 11-5, 12-10
	badminton		1	1	2	5	2070	40	600				---	Jike Zhang vs. Hao Wang	Olympics 2012, London (final)	18-16, 11-5, 11-6, 10-12, 13-11
	badminton		1	1	2	6	2096	40	1040				---	Dimitrij Ovtcharov vs. Chih-Yuan Chuang	Olympics 2012, London (bronze medal match)	12-10, 9-11, 8-11, 13-11, 11-5, 14-12
	badminton		1	1	2	7	2127	40	1240				---	Tianyi Jiang vs. Hyok Bong Kim	Olympics 2012, London (round 4)	14-12, 6-11, 11-13, 9-11, 11-6, 11-7, 15-13
	badminton		1	1	2	8	2139	40	480				---	Jun Mizutani vs. El-Sayed Lashin	Olympics 2012, London (round 3)	11-4, 9-11, 11-9, 11-5, 11-6
	badminton		1	1	2	9	2163	40	960			tennis	clay	Ernests Gulbis vs. Lukasz Kubot	First Round of the 2014 French Open	4-6, 6-4, 7-5, 6-1
	badminton		1	1	2	10	2195	40	1280				hard	Rafael Nadal vs. Roger Federer	Semifinal of the 2014 Australian Open	7-6, 6-3, 6-3
	badminton		1	1	2	11	2216	40	840				grass	Philipp Kohlschreiber vs. Dustin Brown	Quarterfinal of the 2014 Gerry Weber Open	6-4, 5-7, 7-6
	badminton		1	1	2	12	2236	40	800
	badminton		1	1	2	13	2259	40	920
	badminton		1	1	2	14	2282	40	920
	badminton		1	1	2	15	2328	40	1840
	badminton		1	1	2	16	2346	40	720
	badminton		1	1	2	17	2369	40	920
	badminton		1	1	2	18	2401	40	1280
	badminton		1	1	2	19	2413	40	480
	badminton		1	1	2	20	2438	40	1000
	badminton		1	1	2	21	2461	40	920
	badminton		1	1	2	22	2485	40	960
	badminton		1	1	2	23	2533	40	1920
	badminton		1	1	2	24	2566	40	1320
	badminton		1	1	2	25	2600	40	1360
	badminton		1	1	2	26	2620	40	800
	badminton		1	1	2	27	2646	40	1040
	badminton		1	1	2	28	2680	40	1360
	badminton		1	1	2	29	2708	40	1120
	badminton		1	1	2	30	2728	40	800
	badminton		1	1	2	31	2754	40	1040
	badminton		1	1	2	32	2788	40	1360
	badminton		1	1	2	33	2799	40	440
	badminton		1	1	3	1	3705	40
	badminton		1	1	3	2	3724	40	760
	badminton		1	1	3	3	3751	40	1080
	badminton		1	1	3	4	3765	40	560
	badminton		1	1	3	5	3777	40	480
	badminton		1	1	3	6	3795	40	720
	badminton		1	1	3	7	3814	40	760
	badminton		1	1	3	8	3844	40	1200
	badminton		1	1	3	9	3854	40	400
	badminton		1	1	3	10	3877	40	920
	badminton		1	1	3	11	3900	40	920
	badminton		1	1	4	1	4553	40
	badminton		1	1	4	2	4572	40	760
	badminton		1	1	4	3	4596	40	960
	badminton		1	1	4	4	4628	40	1280
	badminton		1	1	4	5	4645	40	680
	badminton		1	1	4	6	4670	40	1000
	badminton		1	1	4	7	4694	40	960
	badminton		1	1	4	8	4719	40	1000
	badminton		1	1	4	9	4740	40	840
	badminton		1	1	4	10	4764	40	960
	badminton		1	1	4	11	4806	40	1680
	badminton		1	1	4	12	4819	40	520
	badminton		1	1	4	13	4838	40	760
	badminton		1	1	4	14	4862	40	960
	badminton		1	1	4	15	4877	40	600
	badminton		1	1	4	16	4901	40	960
	badminton		1	1	4	17	4933	40	1280
	badminton		1	1	4	18	4943	40	400
	badminton		1	1	4	19	4969	40	1040
	badminton		1	1	4	20	5001	40	1280
	badminton		1	1	4	21	5015	40	560
	badminton		1	1	4	22	5028	40	520
	badminton		1	1	4	23	5043	40	600
	badminton		1	1	4	24	5068	40	1000
	badminton		1	1	4	25	5098	40	1200
	badminton		1	1	5	1	5793	40
	badminton		1	1	5	2	5814	40	840
	badminton		1	1	5	3	5831	40	680
	badminton		1	1	5	4	5851	40	800
	badminton		1	1	5	5	5869	40	720
	badminton		1	1	5	6	5896	40	1080
	badminton		1	1	5	7	5907	40	440
	badminton		1	1	5	8	5931	40	960
	badminton		1	1	5	9	5950	40	760
	badminton		1	1	5	10	5970	40	800
	badminton		1	1	5	11	6009	40	1560
	badminton		1	1	5	12	6039	40	1200
	badminton		1	1	5	13	6058	40	760
	badminton		1	1	5	14	6084	40	1040
	badminton		1	1	5	15	6115	40	1240
	badminton		1	1	5	16	6134	40	760
	badminton		1	1	5	17	6160	40	1040
	badminton		1	1	5	18	6183	40	920
	badminton		1	1	6	1	7004	40
	badminton		1	1	6	2	7021	40	680
	badminton		1	1	6	3	7050	40	1160
	badminton		1	1	6	4	7077	40	1080
	badminton		1	1	6	5	7091	40	560
	badminton		1	1	6	6	7104	40	520
	badminton		1	1	6	7	7123	40	760
	badminton		1	1	6	8	7145	40	880
	badminton		1	1	6	9	7182	40	1480
	badminton		1	1	6	10	7202	40	800
	badminton		1	1	6	11	7225	40	920
	badminton		1	1	6	12	7262	40	1480
	badminton		1	1	6	13	7275	40	520
	badminton		1	1	6	14	7298	40	920
	badminton		1	1	6	15	7320	40	880
	badminton		1	1	6	16	7370	40	2000
	badminton		1	1	6	17	7383	40	520
	badminton		1	1	6	18	7405	40	880
	badminton		1	1	6	19	7435	40	1200
	badminton		1	1	7	1	8482	40
	badminton		1	1	7	2	8499	40	680
	badminton		1	1	7	3	8527	40	1120
	badminton		1	1	7	4	8541	40	560
	badminton		1	1	7	5	8561	40	800
	badminton		1	1	7	6	8581	40	800
	badminton		1	1	7	7	8602	40	840
	badminton		1	1	7	8	8649	40	1880
	badminton		1	1	7	9	8659	40	400
	badminton		1	1	8	1	9319	40
	badminton		1	1	8	2	9338	40	760
	badminton		1	1	8	3	9367	40	1160
	badminton		1	1	8	4	9381	40	560
	badminton		1	1	8	5	9401	40	800
	badminton		1	1	8	6	9421	40	800
	badminton		1	1	8	7	9449	40	1120
	badminton		1	1	8	8	9459	40	400
	badminton		1	1	8	9	9487	40	1120
	badminton		1	1	8	10	9509	40	880
	badminton		1	1	8	11	9518	40	360
	badminton		1	1	8	12	9542	40	960
	badminton		1	1	8	13	9564	40	880
	badminton		1	1	8	14	9577	40	520
	badminton		1	1	9	1	10305	40
	badminton		1	1	9	2	10321	40	640
	badminton		1	1	9	3	10341	40	800
	badminton		1	1	9	4	10381	40	1600
	badminton		1	1	9	5	10404	40	920
	badminton		1	1	10	1	11175	40
	badminton		1	1	10	2	11197	40	880
	badminton		1	1	10	3	11211	40	560
	badminton		1	1	10	4	11230	40	760
	badminton		1	1	10	5	11240	40	400
	badminton		1	1	10	6	11250	40	400
	badminton		1	1	10	7	11259	40	360
	badminton		1	1	10	8	11278	40	760
	badminton		1	1	10	9	11316	40	1520
	badminton		1	1	10	10	11327	40	440
	badminton		1	1	10	11	11354	40	1080
	badminton		1	1	10	12	11377	40	920
	badminton		1	1	10	13	11415	40	1520
	badminton		1	1	10	14	11441	40	1040
	badminton		1	1	10	15	11461	40	800
	badminton		1	1	10	16	11491	40	1200
	badminton		1	1	11	1	12161	40
	badminton		1	1	11	2	12181	40	800
	badminton		1	1	11	3	12210	40	1160
	badminton		1	1	11	4	12227	40	680
	badminton		1	1	11	5	12248	40	840
	badminton		1	1	11	6	12266	40	720
	badminton		1	1	11	7	12302	40	1440
	badminton		1	1	12	1	12952	40
	badminton		1	1	12	2	12969	40	680
	badminton		1	1	12	3	12991	40	880
	badminton		1	1	12	4	13020	40	1160
	badminton		1	1	12	5	13038	40	720
	badminton		1	1	12	6	13059	40	840
	badminton		1	1	12	7	13081	40	880
	badminton		1	1	12	8	13113	40	1280
	badminton		1	1	12	9	13137	40	960
	badminton		1	1	12	10	13154	40	680
	badminton		1	1	12	11	13179	40	1000
	badminton		1	1	12	12	13203	40	960
	badminton		1	1	12	13	13240	40	1480
	badminton		1	1	12	14	13260	40	800
	badminton		1	1	12	15	13284	40	960
	badminton		1	1	12	16	13318	40	1360
	badminton		1	1	13	1	14125	40
	badminton		1	1	13	2	14141	40	640
	badminton		1	1	13	3	14174	40	1320
	badminton		1	1	13	4	14186	40	480
	badminton		1	1	13	5	14209	40	920
	badminton		1	1	13	6	14242	40	1320
	badminton		1	1	13	7	14263	40	840
	badminton		1	1	13	8	14287	40	960
	badminton		1	1	13	9	14327	40	1600
	badminton		1	1	13	10	14341	40	560
	badminton		1	1	13	11	14363	40	880
	badminton		1	1	13	12	14395	40	1280
	badminton		1	1	13	13	14417	40	880
	badminton		1	1	13	14	14450	40	1320
	badminton		1	1	14	1	15499	40
	badminton		1	1	14	2	15512	40	520
	badminton		1	1	14	3	15534	40	880
	badminton		1	1	14	4	15568	40	1360
	badminton		1	1	14	5	15586	40	720
	badminton		1	1	14	6	15606	40	800
	badminton		1	1	14	7	15625	40	760
	badminton		1	1	14	8	15647	40	880
	badminton		1	1	14	9	15696	40	1960
	badminton		1	1	14	10	15712	40	640
	badminton		1	1	14	11	15736	40	960
	badminton		1	1	14	12	15764	40	1120
	badminton		1	1	14	13	15780	40	640
	badminton		1	1	14	14	15804	40	960
	badminton		1	1	14	15	15835	40	1240
	badminton		1	1	14	16	15847	40	480
	badminton		1	1	14	17	15871	40	960
	badminton		1	1	14	18	15894	40	920
	badminton		1	1	14	19	15916	40	880
	badminton		1	1	14	20	15969	40	2120
	badminton		1	1	14	21	15985	40	640
	badminton		1	1	14	22	16015	40	1200
	badminton		1	1	14	23	16025	40	400
	badminton		1	1	14	24	16045	40	800
	badminton		1	1	14	25	16054	40	360
	badminton		1	1	15	1	17382	40
	badminton		1	1	15	2	17399	40	680
	badminton		1	1	15	3	17417	40	720
	badminton		1	1	15	4	17450	40	1320
	badminton		1	1	15	5	17462	40	480
	badminton		1	1	15	6	17482	40	800
	badminton		1	1	15	7	17505	40	920
	badminton		1	1	15	8	17528	40	920
	badminton		1	1	15	9	17581	40	2120
	badminton		1	1	15	10	17591	40	400
	badminton		1	1	15	11	17611	40	800
	badminton		1	1	15	12	17634	40	920
	badminton		1	1	15	13	17668	40	1360
	badminton		1	1	15	14	17678	40	400
	badminton		1	1	15	15	17699	40	840
	badminton		1	1	15	16	17719	40	800
	badminton		1	1	15	17	17750	40	1240
	badminton		1	1	15	18	17785	40	1400
	badminton		1	1	15	19	17796	40	440
	badminton		1	1	15	20	17815	40	760
	badminton		1	1	15	21	17849	40	1360
	badminton		1	1	15	22	17861	40	480
	badminton		1	1	15	23	17888	40	1080
	badminton		1	1	15	24	17921	40	1320
	badminton		1	1	15	25	17940	40	760
	badminton		1	1	15	26	17963	40	920
	badminton		1	1	15	27	17994	40	1240
	badminton		1	1	15	28	18017	40	920
	badminton		1	1	15	29	18030	40	520
	badminton		1	1	15	30	18058	40	1120
	badminton		1	1	15	31	18090	40	1280
	badminton		1	1	15	32	18123	40	1320
	badminton		1	1	15	33	18150	40	1080
	badminton		1	1	15	34	18163	40	520
	badminton		1	1	15	35	18187	40	960
	badminton		1	1	15	36	18215	40	1120
	badminton		1	1	15	37	18245	40	1200
	badminton		1	1	15	38	18257	40	480
	badminton		1	1	15	39	18284	40	1080
	badminton		1	1	15	40	18318	40	1360
	badminton		1	1	15	41	18349	40	1240
	badminton		1	1	15	42	18363	40	560
	badminton		1	1	15	43	18389	40	1040
	badminton		1	1	15	44	18420	40	1240
	badminton		1	1	15	45	18455	40	1400
	badminton		1	1	15	46	18476	40	840
	badminton		1	1	15	47	18503	40	1080
	badminton		1	1	15	48	18525	40	880
	badminton		1	1	15	49	18549	40	960
	badminton		1	1	15	50	18585	40	1440
	badminton		1	1	16	1	20556	40
	badminton		1	1	16	2	20579	40	920
	badminton		1	1	16	3	20604	40	1000
	badminton		1	1	16	4	20613	40	360
	badminton		1	1	16	5	20634	40	840
	badminton		1	1	16	6	20655	40	840
	badminton		1	1	17	1	21287	40
	badminton		1	1	17	2	21307	40	800
	badminton		1	1	17	3	21337	40	1200
	badminton		1	1	17	4	21347	40	400
	badminton		1	1	18	1	22041	40
	badminton		1	1	18	2	22061	40	800
	badminton		1	1	18	3	22076	40	600
	badminton		1	1	18	4	22096	40	800
	badminton		1	1	18	5	22118	40	880
	badminton		1	1	18	6	22159	40	1640
	badminton		1	1	18	7	22170	40	440
	badminton		1	1	18	8	22194	40	960
	badminton		1	1	18	9	22215	40	840
	badminton		1	1	18	10	22236	40	840
	badminton		1	1	18	11	22279	40	1720
	badminton		1	1	18	12	22292	40	520
	badminton		1	1	18	13	22322	40	1200
	badminton		1	1	18	14	22341	40	760
	badminton		1	1	18	15	22363	40	880
	badminton		1	1	18	16	22388	40	1000
	badminton		1	1	18	17	22437	40	1960
	badminton		1	1	18	18	22457	40	800
	badminton		1	1	18	19	22483	40	1040
	badminton		1	1	18	20	22514	40	1240
	badminton		1	1	18	21	22534	40	800
	badminton		1	1	18	22	22559	40	1000
	badminton		1	1	18	23	22581	40	880
	badminton		1	1	18	24	22635	40	2160
	badminton		1	1	18	25	22647	40	480
	badminton		1	1	18	26	22667	40	800
	badminton		1	1	18	27	22693	40	1040
	badminton		1	1	18	28	22723	40	1200
	badminton		1	1	18	29	22732	40	360
	badminton		1	1	19	1	23633	40
	badminton		1	1	19	2	23650	40	680
	badminton		1	1	19	3	23672	40	880
	badminton		1	1	19	4	23703	40	1240
	badminton		1	1	19	5	23727	40	960
	badminton		1	1	19	6	23751	40	960
	badminton		1	1	19	7	23809	40	2320
	badminton		1	1	19	8	23820	40	440
	badminton		1	1	19	9	23844	40	960
	badminton		1	1	20	1	24902	40
	badminton		1	1	20	2	24917	40	600
	badminton		1	1	20	3	24935	40	720
	badminton		1	1	20	4	24966	40	1240
	badminton		1	1	20	5	24994	40	1120
	badminton		1	1	20	6	25005	40	440
	badminton		1	1	20	7	25016	40	440
	badminton		1	1	20	8	25040	40	960
	badminton		1	1	21	1	27227	40
	badminton		1	1	21	2	27243	40	640
	badminton		1	1	21	3	27261	40	720
	badminton		1	1	21	4	27295	40	1360
	badminton		1	1	21	5	27323	40	1120
	badminton		1	1	21	6	27346	40	920
	badminton		1	1	21	7	27369	40	920
	badminton		1	1	21	8	27405	40	1440
	badminton		1	1	21	9	27416	40	440
	badminton		1	1	21	10	27444	40	1120
	badminton		1	1	22	1	28395	40
	badminton		1	1	22	2	28410	40	600
	badminton		1	1	22	3	28431	40	840
	badminton		1	1	22	4	28453	40	880
	badminton		1	1	22	5	28488	40	1400
	badminton		1	1	22	6	28499	40	440
	badminton		1	1	22	7	28521	40	880
	badminton		1	1	22	8	28550	40	1160
	badminton		1	1	22	9	28576	40	1040
	badminton		1	1	22	10	28591	40	600
	badminton		1	1	22	11	28617	40	1040
	badminton		1	1	22	12	28642	40	1000
	badminton		1	1	22	13	28659	40	680
	badminton		1	1	22	14	28691	40	1280
	badminton		1	1	22	15	28713	40	880
	badminton		1	1	23	1	30182	40
	badminton		1	1	23	2	30197	40	600
	badminton		1	1	23	3	30218	40	840
	badminton		1	1	23	4	30236	40	720
	badminton		1	1	24	1	30808	40
	badminton		1	1	24	2	30827	40	760
	badminton		1	1	24	3	30863	40	1440
	badminton		1	1	24	4	30877	40	560
	badminton		1	1	24	5	30887	40	400
	badminton		1	1	24	6	30906	40	760
	badminton		1	1	24	7	30927	40	840
	badminton		1	1	24	8	30948	40	840
	badminton		1	1	24	9	30969	40	840
	badminton		1	1	24	10	31009	40	1600
	badminton		1	1	24	11	31022	40	520
	badminton		1	1	24	12	31050	40	1120
	badminton		1	1	24	13	31061	40	440
	badminton		1	1	24	14	31077	40	640
	badminton		1	1	24	15	31086	40	360
	badminton		1	1	24	16	31101	40	600
	badminton		1	1	24	17	31123	40	880
	badminton		1	1	24	18	31153	40	1200
	badminton		1	1	24	19	31167	40	560
	badminton		1	1	25	1	31941	40
	badminton		1	1	25	2	31958	40	680
	badminton		1	1	25	3	31988	40	1200
	badminton		1	1	25	4	32014	40	1040
	badminton		1	1	26	1	32621	40
	badminton		1	1	26	2	32646	40	1000
	badminton		1	1	26	3	32661	40	600
	badminton		1	1	26	4	32682	40	840
	badminton		1	1	27	1	33444	40
	badminton		1	1	27	2	33460	40	640
	badminton		1	1	27	3	33485	40	1000
	badminton		1	1	27	4	33517	40	1280
	badminton		1	1	28	1	35104	40
	badminton		1	1	28	2	35118	40	560
	badminton		1	1	28	3	35138	40	800
	badminton		1	1	29	1	35675	40
	badminton		1	1	29	2	35694	40	760
	badminton		1	1	29	3	35710	40	640
	badminton		1	1	29	4	35727	40	680
	badminton		1	1	29	5	35750	40	920
	badminton		1	1	29	6	35784	40	1360
	badminton		1	1	29	7	35793	40	360
	badminton		1	1	29	8	35817	40	960
	badminton		1	1	29	9	35836	40	760
	badminton		1	1	29	10	35855	40	760
	badminton		1	1	29	11	35887	40	1280
	badminton		1	1	29	12	35908	40	840
	badminton		1	1	29	13	35933	40	1000
	badminton		1	1	29	14	35942	40	360
	badminton		1	1	30	1	36680	40
	badminton		1	1	30	2	36698	40	720
	badminton		1	1	30	3	36727	40	1160
	badminton		1	1	30	4	36742	40	600
	badminton		1	1	30	5	36767	40	1000
	badminton		1	1	30	6	36803	40	1440
	badminton		1	1	30	7	36819	40	640
	badminton		1	1	30	8	36839	40	800
	badminton		1	1	30	9	36861	40	880
	badminton		1	1	30	10	36888	40	1080
	badminton		1	1	30	11	36898	40	400
	badminton		1	1	30	12	36923	40	1000
	badminton		1	1	30	13	36954	40	1240
	badminton		1	1	31	1	37849	40
	badminton		1	1	31	2	37868	40	760
	badminton		1	1	31	3	37885	40	680
	badminton		1	1	31	4	37913	40	1120
	badminton		1	1	31	5	37924	40	440
	badminton		1	1	32	1	38659	40
	badminton		1	1	32	2	38676	40	680
	badminton		1	1	32	3	38703	40	1080
	badminton		1	1	33	1	39454	40
	badminton		1	1	33	2	39470	40	640
	badminton		1	1	33	3	39497	40	1080
	badminton		1	1	33	4	39507	40	400
	badminton		1	1	33	5	39530	40	920
	badminton		1	1	33	6	39547	40	680
	badminton		1	1	33	7	39571	40	960
	badminton		1	1	33	8	39583	40	480
	badminton		1	1	33	9	39595	40	480
	badminton		1	1	33	10	39616	40	840
	badminton		1	1	33	11	39640	40	960
	badminton		1	1	33	12	39678	40	1520
	badminton		1	1	33	13	39690	40	480
	badminton		1	1	33	14	39713	40	920
	badminton		1	1	34	1	41214	40
	badminton		1	1	34	2	41232	40	720
	badminton		1	1	34	3	41264	40	1280
	badminton		1	1	34	4	41275	40	440
	badminton		1	1	34	5	41297	40	880
	badminton		1	1	34	6	41320	40	920
	badminton		1	1	34	7	41350	40	1200
	badminton		1	1	34	8	41360	40	400
	badminton		1	1	35	1	42252	40
	badminton		1	1	35	2	42271	40	760
	badminton		1	1	35	3	42306	40	1400
	badminton		1	1	36	1	43016	40
	badminton		1	1	36	2	43031	40	600
	badminton		1	1	36	3	43051	40	800
	badminton		1	1	36	4	43085	40	1360
	badminton		1	1	36	5	43112	40	1080
	badminton		1	1	36	6	43127	40	600
	badminton		1	1	36	7	43147	40	800
	badminton		1	1	36	8	43174	40	1080
	badminton		1	1	36	9	43189	40	600
	badminton		1	1	36	10	43219	40	1200
	badminton		1	1	36	11	43250	40	1240
	badminton		1	1	36	12	43261	40	440
	badminton		1	1	36	13	43286	40	1000
	badminton		1	1	36	14	43318	40	1280
	badminton		1	1	36	15	43337	40	760
	badminton		1	1	36	16	43361	40	960
	badminton		1	1	36	17	43393	40	1280
	badminton		1	1	36	18	43409	40	640
	badminton		1	1	36	19	43424	40	600
	badminton		1	1	36	20	43435	40	440
	badminton		1	1	36	21	43448	40	520
	badminton		1	1	36	22	43467	40	760
	badminton		1	1	36	23	43489	40	880
	badminton		1	1	36	24	43533	40	1760
	badminton		1	1	36	25	43562	40	1160
	badminton		1	1	36	26	43583	40	840
	badminton		1	1	36	27	43608	40	1000
	badminton		1	1	36	28	43637	40	1160
	badminton		1	1	36	29	43648	40	440
	badminton		1	1	36	30	43673	40	1000
	badminton		1	1	37	1	44758	40
	badminton		1	1	37	2	44775	40	680
	badminton		1	1	37	3	44804	40	1160
	badminton		1	1	37	4	44821	40	680
	badminton		1	1	37	5	44841	40	800
	badminton		1	1	37	6	44876	40	1400
	badminton		1	1	37	7	44891	40	600
	badminton		1	1	37	8	44915	40	960
	badminton		1	1	37	9	44937	40	880
	badminton		1	1	37	10	44968	40	1240
	badminton		1	1	37	11	44980	40	480
	badminton		1	1	37	12	44997	40	680
	badminton		1	1	37	13	45006	40	360
	badminton		1	1	37	14	45020	40	560
	badminton		1	1	38	1	45853	40
	badminton		1	1	38	2	45873	40	800
	badminton		1	1	38	3	45900	40	1080
	badminton		1	1	38	4	45911	40	440
	badminton		1	1	38	5	45936	40	1000
	badminton		1	1	38	6	45960	40	960
	badminton		1	1	39	1	46907	40
	badminton		1	1	39	2	46925	40	720
	badminton		1	1	39	3	46940	40	600
	badminton		1	1	39	4	46959	40	760
	badminton		1	1	39	5	46979	40	800
	badminton		1	1	39	6	47000	40	840
	badminton		1	1	39	7	47045	40	1800
	badminton		1	1	39	8	47054	40	360
	badminton		1	1	39	9	47074	40	800
	badminton		1	1	40	1	48321	40
	badminton		1	1	40	2	48336	40	600
	badminton		1	1	40	3	48354	40	720
	badminton		1	1	40	4	48386	40	1280
	badminton		1	1	40	5	48402	40	640
	badminton		1	1	40	6	48423	40	840
	badminton		1	1	40	7	48445	40	880
	badminton		1	1	40	8	48478	40	1320
	badminton		1	1	40	9	48487	40	360
	badminton		1	1	40	10	48512	40	1000
	badminton		1	1	40	11	48537	40	1000
	badminton		1	1	40	12	48561	40	960
	badminton		1	1	40	13	48598	40	1480
	badminton		1	1	40	14	48609	40	440
	badminton		1	1	40	15	48631	40	880
	badminton		1	1	40	16	48656	40	1000
	badminton		1	1	40	17	48690	40	1360
	badminton		1	1	40	18	48707	40	680
	badminton		1	1	40	19	48730	40	920
	badminton		1	1	40	20	48748	40	720
	badminton		1	1	40	21	48781	40	1320
	badminton		1	1	40	22	48815	40	1360
	badminton		1	1	40	23	48844	40	1160
	badminton		1	1	40	24	48860	40	640
	badminton		1	1	40	25	48874	40	560
	badminton		1	1	40	26	48883	40	360
	badminton		1	1	40	27	48902	40	760
	badminton		1	1	40	28	48925	40	920
	badminton		1	1	40	29	48942	40	680
	badminton		1	1	40	30	48955	40	520
	badminton		1	1	40	31	48972	40	680
	squash		1	1	1	1	10208	40
	squash		1	1	1	2	10233	40	1000
	squash		1	1	1	3	10280	40	1880
	squash		1	1	1	4	10320	40	1600
	squash		1	1	1	5	10349.5	40	1180
	squash		1	1	1	6	10385.5	40	1440
	squash		1	1	1	7	10428	40	1700
	squash		1	1	1	8	10479.5	40	2060
	squash		1	1	1	9	10508	40	1140
	squash		1	1	1	10	10556.5	40	1940
	squash		1	1	1	11	10583	40	1060
	squash		1	1	1	12	10628.5	40	1820
	squash		1	1	1	13	10659	40	1220
	squash		1	1	2	1	10868	40
	squash		1	1	2	2	10889.5	40	860
	squash		1	1	2	3	10912.5	40	920
	squash		1	1	2	4	10947	40	1380
	squash		1	1	2	5	10976.5	40	1180
	squash		1	1	2	6	10997	40	820
	squash		1	1	2	7	11032	40	1400
	squash		1	1	2	8	11068	40	1440
	squash		1	1	2	9	11105	40	1480
	squash		1	1	2	10	11140.5	40	1420
	squash		1	1	3	1	12014	40
	squash		1	1	3	2	12038	40	960
	squash		1	1	3	3	12063.5	40	1020
	squash		1	1	3	4	12083	40	780
	squash		1	1	3	5	12108.5	40	1020
	squash		1	1	3	6	12145	40	1460
	squash		1	1	3	7	12196.5	40	2060
	squash		1	1	3	8	12222	40	1020
	squash		1	1	3	9	12244	40	880
	squash		1	1	3	10	12266	40	880
	squash		1	1	3	11	12297	40	1240
	squash		1	1	3	12	12333	40	1440
	squash		1	1	3	13	12361.5	40	1140
	squash		1	1	3	14	12381.5	40	800
	squash		1	1	3	15	12428.5	40	1880
	squash		1	1	3	16	12461	40	1300
	squash		1	1	3	17	12494	40	1320
	squash		1	1	4	1	12771	40
	squash		1	1	4	2	12830	40	2360
	squash		1	1	4	3	12862.5	40	1300
	squash		1	1	4	4	12892.5	40	1200
	squash		1	1	4	5	12935.5	40	1720
	squash		1	1	4	6	12957.5	40	880
	squash		1	1	4	7	12994	40	1460
	squash		1	1	4	8	13049.5	40	2220
	squash		1	1	4	9	13095.5	40	1840
	squash		1	1	4	10	13140.5	40	1800
	squash		1	1	4	11	13171.5	40	1240
	squash		1	1	4	12	13207.5	40	1440
	squash		1	1	4	13	13255.5	40	1920
	squash		1	1	4	14	13292	40	1460
	squash		1	1	4	15	13335	40	1720
	squash		1	1	4	16	13368	40	1320
	squash		1	1	4	17	13415	40	1880
	squash		1	1	4	18	13451	40	1440
	squash		1	1	4	19	13482.5	40	1260
	squash		1	1	4	20	13506.5	40	960
	squash		1	1	4	21	13529	40	900
	squash		1	1	4	22	13561.5	40	1300
	squash		1	1	4	23	13591	40	1180
	squash		1	1	4	24	13638	40	1880
	squash		1	1	4	25	13680	40	1680
	squash		1	1	4	26	13715	40	1400
	squash		1	1	4	27	13757	40	1680
	squash		1	1	4	28	13780	40	920
	squash		1	1	4	29	13815	40	1400
	squash		1	1	4	30	13836	40	840
	squash		1	1	4	31	13876.5	40	1620
	squash		1	1	4	32	13926	40	1980
	squash		1	1	4	33	13972	40	1840
	squash		1	1	4	34	14004	40	1280
	squash		1	1	4	35	14047	40	1720
	squash		1	1	4	36	14090.5	40	1740
	squash		1	1	4	37	14133	40	1700
	squash		1	1	4	38	14180.5	40	1900
	squash		1	1	4	39	14206	40	1020
	squash		1	1	4	40	14231.5	40	1020
	squash		1	1	4	41	14273	40	1660
	squash		1	1	4	42	14319	40	1840
	squash		1	1	4	43	14351.5	40	1300
	squash		1	1	4	44	14377	40	1020
	squash		1	1	4	45	14410.5	40	1340
	squash		1	1	4	46	14438.5	40	1120
	squash		1	1	4	47	14461	40	900
	squash		1	1	4	48	14511	40	2000
	squash		1	1	4	49	14550.5	40	1580
	squash		1	1	4	50	14604.5	40	2160
	squash		1	1	4	51	14636	40	1260
	squash		1	1	4	52	14655	40	760
	squash		1	1	4	53	14696	40	1640
	squash		1	1	5	1	N/A	40
	squash		1	1	5	2	N/A	40
	squash		1	1	5	3	N/A	40
	squash		1	1	5	4	15138.5	40
	squash		1	1	5	5	15174	40	1420
	squash		1	1	5	6	15201	40	1080
	squash		1	1	5	7	15232.5	40	1260
	squash		1	1	5	8	15265.5	40	1320
	squash		1	1	5	9	15282.5	40	680
	squash		1	1	5	10	15307	40	980
	squash		1	1	5	11	15340.5	40	1340
	squash		1	1	5	12	15364	40	940
	squash		1	1	5	13	15401	40	1480
	squash		1	1	5	14	15441.5	40	1620
	squash		1	1	5	15	15483	40	1660
	squash		1	1	6	1	15695	40
	squash		1	1	6	2	15738	40	1720
	squash		1	1	6	3	15768	40	1200
	squash		1	1	6	4	15798	40	1200
	squash		1	1	6	5	15850.5	40	2100
	squash		1	1	6	6	15887	40	1460
	squash		1	1	6	7	15924	40	1480
	squash		1	1	6	8	15971	40	1880
	squash		1	1	6	9	16016.5	40	1820
	squash		1	1	6	10	16039	40	900
	squash		1	1	6	11	16070	40	1240
	squash		1	1	6	12	16114	40	1760
	squash		1	1	6	13	16145	40	1240
	squash		1	1	6	14	16174.5	40	1180
	squash		1	1	6	15	16208	40	1340
	squash		1	1	6	16	16252.5	40	1780
	squash		1	1	6	17	16276	40	940
	squash		1	1	6	18	16323	40	1880
	squash		1	1	6	19	16347	40	960
	squash		1	1	6	20	16389	40	1680
	squash		1	1	6	21	16420	40	1240
	squash		1	1	6	22	16468	40	1920
	squash		1	1	6	23	16504	40	1440
	squash		1	1	6	24	16549	40	1800
	squash		1	1	6	25	16594.5	40	1820
	squash		1	1	6	26	16641	40	1860
	squash		1	1	6	27	16689.5	40	1940
	squash		1	1	6	28	16737	40	1900
	squash		1	1	6	29	16783.5	40	1860
	squash		1	1	6	30	16826	40	1700
	squash		1	1	6	31	16853	40	1080
	squash		1	1	7	1	17182.5	40
	squash		1	1	7	2	17235	40	2100
	squash		1	1	7	3	17269	40	1360
	squash		1	1	7	4	17296	40	1080
	squash		1	1	7	5	17324	40	1120
	squash		1	1	7	6	17351	40	1080
	squash		1	1	7	7	17389	40	1520
	squash		1	1	7	8	17413	40	960
	squash		1	1	7	9	17464	40	2040
	squash		1	1	7	10	17491	40	1080
	squash		1	1	7	11	17518	40	1080
	squash		1	1	7	12	17538.5	40	820
	squash		1	1	7	13	17573	40	1380
	squash		1	1	7	14	17620	40	1880
	squash		1	1	7	15	17670	40	2000
	squash		1	1	7	16	17711.5	40	1660
	squash		1	1	7	17	17747	40	1420
	squash		1	1	7	18	17774.5	40	1100
	squash		1	1	7	19	17805	40	1220
	squash		1	1	7	20	17832.5	40	1100
	squash		1	1	7	21	17868	40	1420
	squash		1	1	7	22	17899	40	1240
	squash		1	1	7	23	17937	40	1520
	squash		1	1	7	24	18004	40	2680
	squash		1	1	7	25	18031.5	40	1100
	squash		1	1	8	1	18361	40
	squash		1	1	8	2	18392.5	40	1260
	squash		1	1	8	3	18420.5	40	1120
	squash		1	1	8	4	18456	40	1420
	squash		1	1	8	5	18504	40	1920
	squash		1	1	8	6	18529	40	1000
	squash		1	1	8	7	18551	40	880
	squash		1	1	8	8	18583.5	40	1300
	squash		1	1	8	9	18623.5	40	1600
	squash		1	1	8	10	18678.5	40	2200
	squash		1	1	8	11	18703	40	980
	squash		1	1	8	12	18724.5	40	860
	squash		1	1	8	13	18757	40	1300
	squash		1	1	9	1	19004	40
	squash		1	1	9	2	19054.5	40	2020
	squash		1	1	9	3	19081	40	1060
	squash		1	1	9	4	19109	40	1120
	squash		1	1	9	5	19133.5	40	980
	squash		1	1	9	6	19160	40	1060
	squash		1	1	9	7	19191	40	1240
	squash		1	1	9	8	19222	40	1240
	squash		1	1	9	9	19252	40	1200
	squash		1	1	9	10	19308	40	2240
	squash		1	1	9	11	19335	40	1080
	squash		1	1	9	12	19381	40	1840
	squash		1	1	9	13	19434	40	2120
	squash		1	1	9	14	19480	40	1840
	squash		1	1	9	15	19505	40	1000
	squash		1	1	9	16	19536.5	40	1260
	squash		1	1	9	17	19563	40	1060
	squash		1	1	9	18	19598.5	40	1420
	squash		1	1	9	19	19645.5	40	1880
	squash		1	1	9	20	19675	40	1180
	squash		1	1	9	21	19727	40	2080
	squash		1	1	9	22	19773	40	1840
	squash		1	1	9	23	19807	40	1360
	squash		1	1	9	24	19837	40	1200
	squash		1	1	9	25	19863.5	40	1060
	squash		1	1	9	26	19913	40	1980
	squash		1	1	9	27	19959	40	1840
	squash		1	1	9	28	19996	40	1480
	squash		1	1	10	1	N/A	40
	squash		1	1	10	2	20346	40
	squash		1	1	10	3	20380	40	1360
	squash		1	1	10	4	20413	40	1320
	squash		1	1	10	5	20450.5	40	1500
	squash		1	1	10	6	20499	40	1940
	squash		1	1	10	7	20525	40	1040
	squash		1	1	10	8	20552	40	1080
	squash		1	1	10	9	20611	40	2360
	squash		1	1	10	10	20658	40	1880
	squash		1	1	10	11	20705	40	1880
	squash		1	1	10	12	20735	40	1200
	squash		1	1	10	13	20760	40	1000
	squash		1	1	10	14	20792	40	1280
	squash		1	1	10	15	20840.5	40	1940
	squash		1	1	10	16	20888	40	1900
	squash		1	1	10	17	20918.5	40	1220
	squash		1	1	10	18	20946	40	1100
	squash		1	1	10	19	20980	40	1360
	squash		1	1	10	20	21029	40	1960
	squash		1	1	10	21	21058.5	40	1180
	squash		1	1	11	1	21462	40
	squash		1	1	11	2	21491	40	1160
	squash		1	1	11	3	21526.5	40	1420
	squash		1	1	11	4	21566	40	1580
	squash		1	1	11	5	21591	40	1000
	squash		1	1	11	6	21646	40	2200
	squash		1	1	11	7	21670	40	960
	squash		1	1	11	8	21696.5	40	1060
	squash		1	1	11	9	21718	40	860
	squash		1	1	11	10	21753.5	40	1420
	squash		1	1	12	1	N/A	40
	squash		1	1	12	2	22024	40
	squash		1	1	12	3	22061	40	1480
	squash		1	1	12	4	22093	40	1280
	squash		1	1	12	5	22125	40	1280
	squash		1	1	13	1	22335.5	40
	squash		1	1	13	2	22374	40	1540
	squash		1	1	13	3	22416.5	40	1700
	squash		1	1	13	4	22456.5	40	1600
	squash		1	1	13	5	22481	40	980
	squash		1	1	13	6	22516	40	1400
	squash		1	1	13	7	22546.5	40	1220
	squash		1	1	13	8	22572	40	1020
	squash		1	1	13	9	22606	40	1360
	squash		1	1	13	10	22641	40	1400
	squash		1	1	13	11	22669	40	1120
	squash		1	1	13	12	22714.5	40	1820
	squash		1	1	13	13	22764	40	1980
	squash		1	1	13	14	22805.5	40	1660
	squash		1	1	13	15	22838	40	1300
	squash		1	1	13	16	22861	40	920
	squash		1	1	13	17	22914	40	2120
	squash		1	1	13	18	22932	40	720
	squash		1	1	13	19	22949	40	680
	squash		1	1	13	20	22997	40	1920
	squash		1	1	13	21	23031.5	40	1380
	squash		1	1	13	22	23062.5	40	1240
	squash		1	1	13	23	23084	40	860
	squash		1	1	13	24	23114.5	40	1220
	squash		1	1	13	25	23147	40	1300
	squash		1	1	13	26	23191	40	1760
	squash		1	1	13	27	23229	40	1520
	squash		1	1	13	28	23262	40	1320
	squash		1	1	13	29	23287.5	40	1020
	squash		1	1	13	30	23324	40	1460
	squash		1	1	13	31	23354	40	1200
	squash		1	1	13	32	23379	40	1000
	squash		1	1	13	33	23409.5	40	1220
	squash		1	1	13	34	23444	40	1380
	squash		1	1	13	35	23493	40	1960
	squash		1	1	13	36	23525	40	1280
	squash		1	1	13	37	23560	40	1400
	squash		1	1	13	38	23603	40	1720
	squash		1	1	13	39	23629	40	1040
	squash		1	1	13	40	23664	40	1400
	squash		1	1	13	41	23717.5	40	2140
	squash		1	1	13	42	23757	40	1580
	squash		1	1	14	1	24186	40
	squash		1	1	14	2	24216	40	1200
	squash		1	1	14	3	24264.5	40	1940
	squash		1	1	14	4	24310	40	1820
	squash		1	1	14	5	24350	40	1600
	squash		1	1	14	6	24392.5	40	1700
	squash		1	1	14	7	24431	40	1540
	squash		1	1	14	8	24460.5	40	1180
	squash		1	1	14	9	24509	40	1940
	squash		1	1	14	10	24528.5	40	780
	squash		1	1	14	11	24554	40	1020
	squash		1	1	14	12	24573	40	760
	squash		1	1	14	13	24602.5	40	1180
	squash		1	1	14	14	24623.5	40	840
	squash		1	1	14	15	24672.5	40	1960
	squash		1	1	14	16	24695	40	900
	squash		1	1	15	1	24993.5	40
	squash		1	1	15	2	25045.5	40	2080
	squash		1	1	15	3	25070	40	980
	squash		1	1	15	4	25114.5	40	1780
	squash		1	1	15	5	25162	40	1900
	squash		1	1	15	6	25197	40	1400
	squash		1	1	15	7	25224	40	1080
	squash		1	1	15	8	25257	40	1320
	squash		1	1	15	9	25299	40	1680
	squash		1	1	15	10	25344.5	40	1820
	squash		1	1	15	11	25390.5	40	1840
	squash		1	1	15	12	25423	40	1300
	squash		1	1	15	13	25457.5	40	1380
	squash		1	1	15	14	25482.5	40	1000
	squash		1	1	15	15	25510	40	1100
	squash		1	1	15	16	25546	40	1440
	squash		1	1	15	17	25590.5	40	1780
	squash		1	1	15	18	25627	40	1460
	squash		1	1	15	19	25654	40	1080
	squash		1	1	15	20	25676	40	880
	squash		1	1	15	21	25707.5	40	1260
	squash		1	1	15	22	25764	40	2260
	squash		1	1	15	23	25786	40	880
	squash		1	1	16	1	26074.5	40
	squash		1	1	16	2	26125	40	2020
	squash		1	1	16	3	26161	40	1440
	squash		1	1	16	4	26213	40	2080
	squash		1	1	16	5	26241	40	1120
	squash		1	1	16	6	26270	40	1160
	squash		1	1	16	7	26288	40	720
	squash		1	1	17	1	26524	40
	squash		1	1	17	2	26573	40	1960
	squash		1	1	18	1	26719	40
	squash		1	1	18	2	26743.5	40	980
	squash		1	1	18	3	26764.5	40	840
	squash		1	1	18	4	26788	40	940
	squash		1	1	18	5	26822	40	1360
	squash		1	1	18	6	26860	40	1520
	squash		1	1	18	7	26895	40	1400
	squash		1	1	18	8	26926.5	40	1260
	squash		1	1	18	9	26963	40	1460
	squash		1	1	18	10	27007.5	40	1780
	squash		1	1	18	11	27029	40	860
	squash		1	1	18	12	27058.5	40	1180
	squash		1	1	18	13	27087	40	1140
	squash		1	1	18	14	27116	40	1160
	squash		1	1	18	15	27142.5	40	1060
	squash		1	1	18	16	27170	40	1100
	squash		1	1	18	17	27200	40	1200
	squash		1	1	18	18	27227.5	40	1100
	squash		1	1	18	19	27272.5	40	1800
	squash		1	1	18	20	27298	40	1020
	squash		1	1	18	21	27321.5	40	940
	squash		1	1	18	22	27373.5	40	2080
	squash		1	1	18	23	27396.5	40	920
	squash		1	1	19	1	27641	40
	squash		1	1	19	2	27680	40	1560
	squash		1	1	19	3	27708.5	40	1140
	squash		1	1	19	4	27731	40	900
	squash		1	1	19	5	27760	40	1160
	squash		1	1	19	6	27810	40	2000
	squash		1	1	19	7	27840.5	40	1220
	squash		1	1	19	8	27879	40	1540
	squash		1	1	19	9	27905	40	1040
	squash		1	1	19	10	27940	40	1400
	squash		1	1	19	11	27971.5	40	1260
	squash		1	1	19	12	27997	40	1020
	squash		1	1	19	13	28030.5	40	1340
	squash		1	1	19	14	28056	40	1020
	squash		1	1	20	1	29231	40
	squash		1	1	20	2	29255	40	960
	squash		1	1	21	1	29404.5	40
	squash		1	1	21	2	29441.5	40	1480
	squash		1	1	21	3	29474	40	1300
	squash		1	1	21	4	29501.5	40	1100
	squash		1	1	21	5	29533	40	1260
	squash		1	1	21	6	29576	40	1720
	squash		1	1	21	7	29597.5	40	860
	squash		1	1	22	1	N/A	40
	squash		1	1	22	2	30084	40
	squash		1	1	22	3	30119	40	1400
	squash		1	1	22	4	30164	40	1800
	squash		1	1	22	5	30194	40	1200
	squash		1	1	22	6	30224	40	1200
	squash		1	1	22	7	30260	40	1440
	squash		1	1	22	8	30289.5	40	1180
	squash		1	1	22	9	30322	40	1300
	squash		1	1	22	10	30350.5	40	1140
	squash		1	1	22	11	30384	40	1340
	squash		1	1	22	12	30431	40	1880
	squash		1	1	22	13	30479	40	1920
	squash		1	1	22	14	30507.5	40	1140
	squash		1	1	22	15	30543.5	40	1440
	squash		1	1	22	16	30597	40	2140
	squash		1	1	22	17	30620.5	40	940
	squash		1	1	22	18	30670	40	1980
	squash		1	1	22	19	30715.5	40	1820
	squash		1	1	22	20	30741	40	1020
	squash		1	1	22	21	30776	40	1400
	squash		1	1	22	22	30806.5	40	1220
	squash		1	1	22	23	30855.5	40	1960
	squash		1	1	22	24	30882.5	40	1080
	squash		1	1	22	25	30912	40	1180
	squash		1	1	22	26	30935	40	920
	squash		1	1	22	27	30968	40	1320
	squash		1	1	23	1	32149	40
	squash		1	1	23	2	32174	40	1000
	squash		1	1	23	3	32210	40	1440
	squash		1	1	23	4	32235	40	1000
	squash		1	1	23	5	32259.5	40	980
	squash		1	1	23	6	32287	40	1100
	squash		1	1	23	7	32315	40	1120
	squash		1	1	23	8	32339	40	960
	squash		1	1	23	9	32366	40	1080
	squash		1	1	23	10	32412	40	1840
	squash		1	1	23	11	32444	40	1280
	squash		1	1	23	12	32478	40	1360
	squash		1	1	23	13	32513.5	40	1420
	squash		1	1	23	14	32571.5	40	2320
	squash		1	1	23	15	32617	40	1820
	squash		1	1	23	16	32645	40	1120
	squash		1	1	23	17	32685.5	40	1620
	squash		1	1	23	18	32717.5	40	1280
	squash		1	1	23	19	32740.5	40	920
	squash		1	1	23	20	32774.5	40	1360
	squash		1	1	23	21	32817.5	40	1720
	squash		1	1	23	22	32841	40	940
	squash		1	1	23	23	32871.5	40	1220
	squash		1	1	23	24	32904.5	40	1320
	squash		1	1	23	25	32934	40	1180
	squash		1	1	23	26	32985	40	2040
	squash		1	1	23	27	33007	40	880
	squash		1	1	23	28	33027.5	40	820
	squash		1	1	23	29	33070.5	40	1720
	squash		1	1	23	30	33103	40	1300
	squash		1	1	23	31	33132.5	40	1180
	squash		1	1	23	32	33156	40	940
	squash		1	1	23	33	33186.5	40	1220
	squash		1	1	23	34	33210	40	940
	squash		1	1	23	35	33241.5	40	1260
	squash		1	1	23	36	33290.5	40	1960
	squash		1	1	23	37	33323	40	1300
	squash		1	1	23	38	33356	40	1320
	squash		1	1	23	39	33404	40	1920
	squash		1	1	23	40	33426	40	880
	squash		1	1	24	1	33785	40
	squash		1	1	24	2	33840	40	2200
	squash		1	1	24	3	33863	40	920
	squash		1	1	24	4	33896	40	1320
	squash		1	1	24	5	33922	40	1040
	squash		1	1	24	6	33946	40	960
	squash		1	1	24	7	34004	40	2320
	squash		1	1	24	8	34030.5	40	1060
	squash		1	1	24	9	34058	40	1100
	squash		1	1	25	1	34502	40
	squash		1	1	25	2	34550	40	1920
	squash		1	1	25	3	34581	40	1240
	squash		1	1	25	4	34632.5	40	2060
	squash		1	1	25	5	34663	40	1220
	squash		1	1	25	6	34695	40	1280
	squash		1	1	25	7	34752	40	2280
	squash		1	1	25	8	34779	40	1080
	squash		1	1	25	9	34829	40	2000
	squash		1	1	25	10	34873.5	40	1780
	squash		1	1	25	11	34918.5	40	1800
	squash		1	1	25	12	34960	40	1660
	squash		1	1	25	13	35005.5	40	1820
	squash		1	1	25	14	35042	40	1460
	squash		1	1	25	15	35080	40	1520
	squash		1	1	25	16	35128.5	40	1940
	squash		1	1	25	17	35164	40	1420
	squash		1	1	25	18	35192.5	40	1140
	squash		1	1	25	19	35224	40	1260
	squash		1	1	25	20	35274	40	2000
	squash		1	1	25	21	35301	40	1080
	squash		1	1	25	22	35337	40	1440
	squash		1	1	25	23	35370	40	1320
	squash		1	1	25	24	35399	40	1160
	squash		1	1	25	25	35425	40	1040
	squash		1	1	25	26	35484	40	2360
	squash		1	1	25	27	35535	40	2040
	squash		1	1	25	28	35564	40	1160
	squash		1	1	25	29	35596	40	1280
	squash		1	1	25	30	35651	40	2200
	squash		1	1	25	31	35693	40	1680
	squash		1	1	25	32	35747.5	40	2180
	squash		1	1	25	33	35787	40	1580
	squash		1	1	25	34	35839	40	2080
	squash		1	1	25	35	35875	40	1440
	squash		1	1	26	1	36505	40
	squash		1	1	26	2	36538.5	40	1340
	squash		1	1	26	3	36574.5	40	1440
	squash		1	1	26	4	36604	40	1180
	squash		1	1	26	5	36630	40	1040
	squash		1	1	26	6	36662	40	1280
	squash		1	1	26	7	36689	40	1080
	squash		1	1	26	8	36716.5	40	1100
	squash		1	1	26	9	36747	40	1220
	squash		1	1	26	10	36795	40	1920
	squash		1	1	26	11	36823.5	40	1140
	squash		1	1	26	12	36886	40	2500
	squash		1	1	26	13	36911	40	1000
	squash		1	1	26	14	36950.5	40	1580
	squash		1	1	26	15	36986	40	1420
	squash		1	1	26	16	37018	40	1280
	squash		1	1	26	17	37041	40	920
	squash		1	1	27	1	37378	40
	squash		1	1	27	2	37423.5	40	1820
	squash		1	1	27	3	37448	40	980
	squash		1	1	27	4	37476.5	40	1140
	squash		1	1	27	5	37511	40	1380
	squash		1	1	27	6	37563	40	2080
	squash		1	1	27	7	37598	40	1400
	squash		1	1	27	8	37647	40	1960
	squash		1	1	27	9	37674.5	40	1100
	squash		1	1	27	10	37710	40	1420
	squash		1	1	27	11	37757	40	1880
	squash		1	1	27	12	37821	40	2560
	squash		1	1	27	13	37864.5	40	1740
	squash		1	1	27	14	37893.5	40	1160
	squash		1	1	27	15	37926	40	1300
	squash		1	1	27	16	37982.5	40	2260
	squash		1	1	27	17	38005	40	900
	squash		1	1	27	18	38028	40	920
	squash		1	1	27	19	38063	40	1400
	squash		1	1	28	1	N/A	40
	squash		1	1	28	2	N/A	40
	squash		1	1	28	3	38791.5	40
	squash		1	1	29	3	38818	40
	squash		1	1	29	4	38860	40	1680
	squash		1	1	30	1	39085	40
	squash		1	1	30	2	39108	40	920
	squash		1	1	30	3	39155.5	40	1900
	squash		1	1	30	4	39182	40	1060
	squash		1	1	30	5	39210	40	1120
	squash		1	1	30	6	39257.5	40	1900
	squash		1	1	30	7	39289	40	1260
	squash		1	1	30	8	39316	40	1080
	squash		1	1	30	9	39338	40	880
	table tennis		1	1	1	1	4649	40
	table tennis		1	1	1	2	4667.5	40	740
	table tennis		1	1	2	1	5056	40
	table tennis		1	1	2	2	5075.5	40	780
	table tennis		1	1	2	3	5085.5	40	400
	table tennis		1	1	2	4	5094	40	340
	table tennis		1	1	2	5	5111	40	680
	table tennis		1	1	2	6	5126	40	600
	table tennis		1	1	3	1	5563	40
	table tennis		1	1	4	1	5887	40
	table tennis		1	1	4	2	5904.5	40	700
	table tennis		1	1	4	3	5914	40	380
	table tennis		1	1	4	4	5931	40	680
	table tennis		1	1	4	5	5942	40	440
	table tennis		1	1	4	6	5955.5	40	540
	table tennis		1	1	4	7	5967	40	460
	table tennis		1	1	5	1	6606	40
	table tennis		1	1	5	2	6621.5	40	620
	table tennis		1	1	5	3	6634	40	500
	table tennis		1	1	5	4	6650	40	640
	table tennis		1	1	5	5	6660	40	400
	table tennis		1	1	5	6	6672.5	40	500
	table tennis		1	1	5	7	6680.5	40	320
	table tennis		1	1	5	8	6689.5	40	360
	table tennis		1	1	6	1	7226	40
	table tennis		1	1	6	2	7245.5	40	780
	table tennis		1	1	6	3	7254	40	340
	table tennis		1	1	6	4	7264.5	40	420
	table tennis		1	1	6	5	7274	40	380
	table tennis		1	1	7	1	8044	40
	table tennis		1	1	7	2	8060.5	40	660
	table tennis		1	1	7	3	8070	40	380
	table tennis		1	1	8	1	8507	40
	table tennis		1	1	8	2	8524.5	40	700
	table tennis		1	1	8	3	8533	40	340
	table tennis		1	1	8	4	8549	40	640
	table tennis		1	1	8	5	8560	40	440
	table tennis		1	1	8	6	8572	40	480
	table tennis		1	1	9	1	9017	40
	table tennis		1	1	9	2	9032	40	600
	table tennis		1	1	9	3	9044	40	480
	table tennis		1	1	10	1	9498	40
	table tennis		1	1	10	2	9513	40	600
	table tennis		1	1	10	3	9531	40	720
	table tennis		1	1	11	1	10008	40
	table tennis		1	1	11	2	10023.5	40	620
	table tennis		1	1	11	3	10043.5	40	800
	table tennis		1	1	11	4	10052.5	40	360
	table tennis		1	1	12	1	10555	40
	table tennis		1	1	12	2	10572	40	680
	table tennis		1	1	12	3	10581.5	40	380
	table tennis		1	1	13	1	11509	40
	table tennis		1	1	13	2	11524.5	40	620
	table tennis		1	1	14	1	11859.5	40
	table tennis		1	1	14	2	11875	40	620
	table tennis		1	1	14	3	11893.5	40	740
	table tennis		1	1	14	4	11910	40	660
	table tennis		1	1	14	5	11920.5	40	420
	table tennis		1	1	15	1	12396	40
	table tennis		1	1	15	2	12413	40	680
	table tennis		1	1	15	3	12430.5	40	700
	table tennis		1	1	16	1	12900.5	40
	table tennis		1	1	16	2	12917	40	660
	table tennis		1	1	16	3	12935.5	40	740
	table tennis		1	1	16	4	12943	40	300
	table tennis		1	1	16	5	12952	40	360
	table tennis		1	1	16	6	12967	40	600
	table tennis		1	1	16	7	12990	40	920
	table tennis		1	1	16	8	12999.5	40	380
	table tennis		1	1	17	1	13623	40
	table tennis		1	1	17	2	13642	40	760
	table tennis		1	1	17	3	13656.5	40	580
	table tennis		1	1	18	1	14301	40
	table tennis		1	1	18	2	14316	40	600
	table tennis		1	1	18	3	14328	40	480
	table tennis		1	1	18	4	14344	40	640
	table tennis		1	1	18	5	14363	40	760
	table tennis		1	1	18	6	14370	40	280
	table tennis		1	1	18	7	14391	40	840
	table tennis		1	1	19	1	15134	40
	table tennis		1	1	19	2	15150	40	640
	table tennis		1	1	19	3	15168	40	720
	table tennis		1	1	19	4	15175	40	280
	table tennis		1	1	19	5	15184.5	40	380
	table tennis		1	1	19	6	15201	40	660
	table tennis		1	1	19	7	15216	40	600
	table tennis		1	2	20	1	17167	40
	table tennis		1	2	20	2	17182	40	600
	table tennis		1	2	20	3	17198	40	640
	table tennis		1	2	20	4	17212	40	560
	table tennis		1	2	20	5	17227.5	40	620
	table tennis		1	2	21	1	17543.5	40
	table tennis		1	2	22	1	17898.5	40
	table tennis		1	2	22	2	17917	40	740
	table tennis		1	2	22	3	17928	40	440
	table tennis		1	2	22	4	17936.5	40	340
	table tennis		1	2	22	5	17949.5	40	520
	table tennis		1	2	23	1	18964	40
	table tennis		1	2	23	2	18981.5	40	700
	table tennis		1	2	23	3	18990	40	340
	table tennis		1	2	24	1	19489.5	40
	table tennis		1	2	24	2	19507	40	700
	table tennis		1	2	24	3	19524	40	680
	table tennis		1	2	24	4	19538	40	560
	table tennis		1	2	24	5	19550	40	480
	table tennis		1	2	24	6	19565	40	600
	table tennis		1	2	24	7	19576.5	40	460
	table tennis		1	2	24	8	19588	40	460
	table tennis		1	2	25	1	20366	40
	table tennis		1	2	25	2	20386	40	800
	table tennis		1	2	25	3	20397.5	40	460
	table tennis		1	2	26	1	20921.5	40
	table tennis		1	2	26	2	20941	40	780
	table tennis		1	2	26	3	20950.5	40	380
	table tennis		1	2	27	1	21409.5	40
	table tennis		1	2	27	2	21427.5	40	720
	table tennis		1	2	27	3	21442	40	580
	table tennis		1	2	28	1	21990.5	40
	table tennis		1	2	28	2	22007	40	660
	table tennis		1	2	28	3	22014.5	40	300
	table tennis		1	2	28	4	22026	40	460
	table tennis		1	2	28	5	22037	40	440
	table tennis		1	2	29	1	22570	40
	table tennis		1	2	29	2	22585	40	600
	table tennis		1	2	29	3	22599.5	40	580
	table tennis		1	2	30	1	23075.5	40
	table tennis		1	2	30	2	23091	40	620
	table tennis		1	2	30	3	23106	40	600
	table tennis		1	2	31	1	23790	40
	table tennis		1	2	31	2	23808.5	40	740
	table tennis		1	2	31	3	23819	40	420
	table tennis		1	2	32	1	24241	40
	table tennis		1	2	32	2	24259	40	720
	table tennis		1	2	32	3	24274	40	600
	table tennis		1	2	32	4	24286.5	40	500
	table tennis		1	2	33	1	24606	40
	table tennis		1	2	33	2	24625	40	760
	table tennis		1	2	33	3	24635.5	40	420
	tennis	hard	1	1	1	1	677	33.3333
	tennis	hard	1	1	1	2	699	33.3333	733.333
	tennis	hard	1	1	2	1	1189.5	33.3333
	tennis	hard	1	1	2	2	1211.5	33.3333	733.333
	tennis	hard	1	1	2	3	1247	33.3333	1183.33
	tennis	hard	1	1	2	4	1283	33.3333	1200
	tennis	hard	1	1	2	5	1320	33.3333	1233.33
	tennis	hard	1	1	2	6	1355	33.3333	1166.67
	tennis	hard	1	1	3	1	1926	33.3333
	tennis	hard	1	1	3	2	1948	33.3333	733.333
	tennis	hard	1	1	4	1	2418	33.3333
	tennis	hard	1	1	5	1	2675	33.3333
	tennis	hard	1	1	5	2	2703.5	33.3333	950
	tennis	hard	1	1	6	1	3428	33.3333
	tennis	hard	1	1	7	1	3685	33.3333
	tennis	hard	1	1	7	2	3710.5	33.3333	850
	tennis	hard	1	1	8	1	6337.5	33.3333
	tennis	hard	1	1	8	2	6358.5	33.3333	700
	tennis	hard	1	1	9	1	7041	33.3333
	tennis	hard	1	1	9	2	7063	33.3333	733.333
	tennis	hard	1	1	9	3	7099	33.3333	1200
	tennis	hard	1	1	9	4	7135	33.3333	1200
	tennis	hard	1	1	9	5	7183	33.3333	1600
	tennis	hard	1	1	9	6	7219	33.3333	1200
	tennis	hard	1	1	9	7	7257	33.3333	1266.67
	tennis	hard	1	1	9	8	7292.5	33.3333	1183.33
	tennis	hard	1	1	10	1	8036.5	33.3333
	tennis	hard	1	1	10	2	8057	33.3333	683.333
	tennis	hard	1	1	11	1	8760	33.3333
	tennis	hard	1	1	11	2	8778	33.3333	600
	tennis	hard	1	1	11	3	8826	33.3333	1600
	tennis	hard	1	1	11	4	8865	33.3333	1300
	tennis	hard	1	1	12	1	9813	33.3333
	tennis	hard	1	1	12	2	9835	33.3333	733.333
	tennis	hard	1	1	12	3	9882	33.3333	1566.67
	tennis	hard	1	1	12	4	9916.5	33.3333	1150
	tennis	hard	1	1	12	5	9968.5	33.3333	1733.33
	tennis	hard	1	1	12	6	10009.5	33.3333	1366.67
	tennis	hard	1	1	12	7	10049	33.3333	1316.67
	tennis	hard	1	1	12	8	10083.5	33.3333	1150
	tennis	hard	1	1	13	1	10698.5	33.3333
	tennis	hard	1	1	14	1	10977.5	33.3333
	tennis	hard	1	1	14	2	11014	33.3333	1216.67
	tennis	hard	1	1	14	3	11053	33.3333	1300
	tennis	hard	1	1	14	4	11084.5	33.3333	1050
	tennis	hard	1	1	14	5	11121.5	33.3333	1233.33
	tennis	hard	1	1	15	1	11755	33.3333
	tennis	hard	1	1	15	2	11781	33.3333	866.667
	tennis	hard	1	1	16	1	12338.5	33.3333
	tennis	hard	1	1	16	2	12364	33.3333	850
	tennis	hard	1	1	16	3	12407.5	33.3333	1450
	tennis	hard	1	1	16	4	12437	33.3333	983.333
	tennis	hard	1	1	16	5	12460	33.3333	766.667
	tennis	hard	1	1	17	1	13172	33.3333
	tennis	hard	1	1	17	2	13200	33.3333	933.333
	tennis	hard	1	1	17	3	13233.5	33.3333	1116.67
	tennis	hard	1	1	18	1	13909.5	33.3333
	tennis	hard	1	1	19	1	14134.5	33.3333
	tennis	hard	1	1	19	2	14167	33.3333	1083.33
	tennis	hard	1	1	19	3	14202	33.3333	1166.67
	tennis	hard	1	1	19	4	14243	33.3333	1366.67
	tennis	hard	1	1	19	5	14278	33.3333	1166.67
	tennis	hard	1	1	19	6	14319	33.3333	1366.67
	tennis	hard	1	1	19	7	14363	33.3333	1466.67
	tennis	hard	1	1	19	8	14397	33.3333	1133.33
	tennis	hard	1	1	19	9	14437	33.3333	1333.33
	tennis	hard	1	1	19	10	14475	33.3333	1266.67
	tennis	hard	1	1	19	11	14550	33.3333	2500
	tennis	hard	1	1	19	12	14594.5	33.3333	1483.33
	tennis	hard	1	1	19	13	14606.5	33.3333	400
	tennis	hard	1	1	20	1	16462	33.3333
	tennis	hard	1	1	20	2	16484	33.3333	733.333
	tennis	hard	1	1	20	3	16524	33.3333	1333.33
	tennis	hard	1	1	20	4	16559.5	33.3333	1183.33
	tennis	hard	1	1	20	5	16591	33.3333	1050
	tennis	hard	1	1	20	6	16618	33.3333	900
	tennis	hard	1	1	20	7	16683	33.3333	2166.67
	tennis	hard	1	1	20	8	16706	33.3333	766.667
	tennis	hard	1	1	21	1	17701	33.3333
	tennis	hard	1	1	21	2	17723	33.3333	733.333
	tennis	hard	1	1	21	3	17776.5	33.3333	1783.33
	tennis	hard	1	1	21	4	17809	33.3333	1083.33
	tennis	hard	1	1	21	5	17826	33.3333	566.667
	tennis	hard	1	1	22	1	18868	33.3333
	tennis	hard	1	1	22	2	18890	33.3333	733.333
	tennis	hard	1	1	22	3	18928.5	33.3333	1283.33
	tennis	hard	1	1	22	4	18960	33.3333	1050
	tennis	hard	1	1	22	5	19001	33.3333	1366.67
	tennis	hard	1	1	22	6	19038	33.3333	1233.33
	tennis	hard	1	1	22	7	19074	33.3333	1200
	tennis	hard	1	1	22	8	19096	33.3333	733.333
	tennis	hard	1	1	22	9	19146.5	33.3333	1683.33
	tennis	hard	1	1	23	1	20144.5	33.3333
	tennis	hard	1	1	23	2	20168	33.3333	783.333
	tennis	hard	1	1	23	3	20222	33.3333	1800
	tennis	hard	1	1	23	4	20256	33.3333	1133.33
	tennis	hard	1	1	23	5	20291	33.3333	1166.67
	tennis	hard	1	1	23	6	20329	33.3333	1266.67
	tennis	hard	1	1	23	7	20364	33.3333	1166.67
	tennis	hard	1	1	23	8	20398	33.3333	1133.33
	tennis	hard	1	1	23	9	20438.5	33.3333	1350
	tennis	hard	1	1	23	10	20474.5	33.3333	1200
	tennis	hard	1	1	23	11	20518	33.3333	1450
	tennis	hard	1	1	23	12	20555	33.3333	1233.33
	tennis	hard	1	1	24	1	21493	33.3333
	tennis	hard	1	1	24	2	21513	33.3333	666.667
	tennis	hard	1	1	24	3	21543.5	33.3333	1016.67
	tennis	hard	1	1	24	4	21578	33.3333	1150
	tennis	hard	1	1	25	1	22327	33.3333
	tennis	hard	1	1	26	1	22677	33.3333
	tennis	hard	1	1	26	2	22704.5	33.3333	916.667
	tennis	hard	1	1	27	1	23593	33.3333
	tennis	hard	1	1	27	2	23614	33.3333	700
	tennis	hard	1	1	27	3	23648.5	33.3333	1150
	tennis	hard	1	1	27	4	23687	33.3333	1283.33
	tennis	hard	1	1	27	5	23728	33.3333	1366.67
	tennis	hard	1	1	27	6	23765	33.3333	1233.33
	tennis	hard	1	1	28	1	24684	33.3333
	tennis	hard	1	1	28	2	24705.5	33.3333	716.667
	tennis	hard	1	1	28	3	24742.5	33.3333	1233.33
	tennis	hard	1	1	28	4	24777	33.3333	1150
	tennis	hard	1	1	28	5	24815.5	33.3333	1283.33
	tennis	hard	1	1	29	1	25837	33.3333
	tennis	hard	1	1	29	2	25857	33.3333	666.667
	tennis	hard	1	1	29	3	25895	33.3333	1266.67
	tennis	hard	1	1	29	4	25927	33.3333	1066.67
	tennis	hard	1	1	30	1	26634	33.3333
	tennis	hard	1	1	31	1	26881.5	33.3333
	tennis	hard	1	1	31	2	26911	33.3333	983.333
	tennis	hard	1	1	31	3	26949	33.3333	1266.67
	tennis	hard	1	1	31	4	26983	33.3333	1133.33
	tennis	hard	1	1	32	1	27573	33.3333
	tennis	hard	1	1	32	2	27595	33.3333	733.333
	tennis	hard	1	1	33	1	28108	33.3333
	tennis	hard	1	1	33	2	28139	33.3333	1033.33
	tennis	hard	1	1	34	1	29897	33.3333
	tennis	hard	1	1	35	1	30313.5	33.3333
	tennis	hard	1	1	35	2	30337	33.3333	783.333
	tennis	hard	1	1	36	1	31080	33.3333
	tennis	hard	1	1	36	2	31101	33.3333	700
	tennis	hard	1	1	36	3	31138.5	33.3333	1250
	tennis	hard	1	1	36	4	31174.5	33.3333	1200
	tennis	hard	1	1	36	5	31213	33.3333	1283.33
	tennis	hard	1	1	36	6	31249	33.3333	1200
	tennis	hard	1	1	36	7	31279	33.3333	1000
	tennis	hard	1	1	36	8	31326.5	33.3333	1583.33
	tennis	hard	1	1	36	9	31370.5	33.3333	1466.67
	tennis	hard	1	1	36	10	31409	33.3333	1283.33
	tennis	hard	1	1	37	1	32262	33.3333
	tennis	hard	1	1	37	2	32280	33.3333	600
	tennis	hard	1	1	38	1	32935	33.3333
	tennis	hard	1	1	39	1	33303	33.3333
	tennis	hard	1	1	39	2	33326	33.3333	766.667
	tennis	hard	1	1	39	3	33373	33.3333	1566.67
	tennis	hard	1	1	39	4	33407.5	33.3333	1150
	tennis	hard	1	1	40	1	34388	33.3333
	tennis	hard	1	1	40	2	34417	33.3333	966.667
	tennis	hard	1	1	40	3	34472	33.3333	1833.33
	tennis	hard	1	1	41	1	34986.5	33.3333
	tennis	hard	1	1	42	1	35290	33.3333
	tennis	hard	1	1	42	2	35323	33.3333	1100
	tennis	hard	1	1	42	3	35369	33.3333	1533.33
	tennis	hard	1	1	42	4	35400.5	33.3333	1050
	tennis	hard	1	1	42	5	35440	33.3333	1316.67
	tennis	hard	1	1	42	6	35473	33.3333	1100
	tennis	hard	1	1	43	1	36165	33.3333
	tennis	hard	1	1	43	2	36193	33.3333	933.333
	tennis	hard	1	1	44	1	36860.5	33.3333
	tennis	hard	1	1	44	2	36885	33.3333	816.667
	tennis	hard	1	1	44	3	36929.5	33.3333	1483.33
	tennis	hard	1	1	44	4	36964	33.3333	1150
	tennis	hard	1	1	45	1	37755	33.3333
	tennis	hard	1	1	45	2	37782.5	33.3333	916.667
	tennis	hard	1	1	45	3	37817	33.3333	1150
	tennis	hard	1	1	45	4	37857	33.3333	1333.33
	tennis	hard	1	1	45	5	37895.5	33.3333	1283.33
	tennis	hard	1	1	45	6	37930	33.3333	1150
	tennis	hard	1	1	45	7	37972.5	33.3333	1416.67
	tennis	hard	1	1	45	8	38009	33.3333	1216.67
	tennis	hard	1	1	46	1	38886	33.3333
	tennis	hard	1	1	46	2	38910	33.3333	800
	tennis	hard	1	1	46	3	38960	33.3333	1666.67
	tennis	hard	1	1	46	4	38993	33.3333	1100
	tennis	hard	1	1	47	1	39709	33.3333
	tennis	hard	1	1	47	2	39734.5	33.3333	850
	tennis	hard	1	1	47	3	39781.5	33.3333	1566.67
	tennis	hard	1	1	47	4	39828	33.3333	1550
	tennis	hard	1	1	48	1	40478.5	33.3333
	tennis	hard	1	1	48	2	40502	33.3333	783.333
	tennis	hard	1	1	48	3	40543.5	33.3333	1383.33
	tennis	hard	1	1	48	4	40575.5	33.3333	1066.67
	tennis	hard	1	1	48	5	40621	33.3333	1516.67
	tennis	hard	1	1	49	1	41279.5	33.3333
	tennis	hard	1	1	50	1	41886	33.3333
	tennis	hard	1	1	51	1	42183.5	33.3333
	tennis	hard	1	1	51	2	42211.5	33.3333	933.333
	tennis	hard	1	1	51	3	42256	33.3333	1483.33
	tennis	hard	1	1	51	4	42289.5	33.3333	1116.67
	tennis	hard	1	1	52	1	44051	33.3333
	tennis	hard	1	1	52	2	44072	33.3333	700
	tennis	hard	1	1	53	1	44746.5	33.3333
	tennis	hard	1	1	54	1	45099	33.3333
	tennis	hard	1	1	54	2	45131.5	33.3333	1083.33
	tennis	hard	1	1	54	3	45170.5	33.3333	1300
	tennis	hard	1	1	54	4	45211.5	33.3333	1366.67
	tennis	hard	1	1	55	1	45997.5	33.3333
	tennis	hard	1	1	55	2	46019	33.3333	716.667
	tennis	hard	1	1	55	3	46066.5	33.3333	1583.33
	tennis	hard	1	1	55	4	46107	33.3333	1350
	tennis	hard	1	1	55	5	46161	33.3333	1800
	tennis	hard	1	1	55	6	46190	33.3333	966.667
	tennis	hard	1	1	55	7	46240.5	33.3333	1683.33
	tennis	hard	1	1	55	8	46272	33.3333	1050
	tennis	hard	1	1	55	9	46310	33.3333	1266.67
	tennis	hard	1	1	56	1	47229	33.3333
	tennis	hard	1	1	56	2	47252	33.3333	766.667
	tennis	hard	1	1	56	3	47286.5	33.3333	1150
	tennis	hard	1	1	56	4	47326.5	33.3333	1333.33
	tennis	hard	1	1	57	1	48169	33.3333
	tennis	hard	1	1	57	2	48190	33.3333	700
	tennis	hard	1	1	57	3	48222.5	33.3333	1083.33
	tennis	hard	1	1	57	4	48276.5	33.3333	1800
	tennis	hard	1	1	57	5	48308	33.3333	1050
	tennis	hard	1	1	57	6	48343	33.3333	1166.67
	tennis	hard	1	1	57	7	48380	33.3333	1233.33
	tennis	hard	1	1	57	8	48423	33.3333	1433.33
	tennis	hard	1	1	57	9	48465	33.3333	1400
	tennis	hard	1	1	57	10	48504	33.3333	1300
	tennis	hard	1	1	58	1	49512	33.3333
	tennis	hard	1	1	59	1	49857	33.3333
	tennis	hard	1	1	59	2	49893	33.3333	1200
	tennis	hard	1	1	59	3	49925.5	33.3333	1083.33
	tennis	hard	1	1	59	4	49965	33.3333	1316.67
	tennis	hard	1	1	59	5	50002	33.3333	1233.33
	tennis	hard	1	1	59	6	50040	33.3333	1266.67
	tennis	hard	1	1	59	7	50080.5	33.3333	1350
	tennis	hard	1	1	59	8	50122	33.3333	1383.33
	tennis	hard	1	1	59	9	50155.5	33.3333	1116.67
	tennis	hard	1	1	59	10	50198.5	33.3333	1433.33
	tennis	hard	1	1	59	11	50243	33.3333	1483.33
	tennis	hard	1	1	59	12	50278	33.3333	1166.67
	tennis	hard	1	1	59	13	50323	33.3333	1500
	tennis	hard	1	1	59	14	50356.5	33.3333	1116.67
	tennis	hard	1	1	59	15	50391.5	33.3333	1166.67
	tennis	hard	1	1	59	16	50430	33.3333	1283.33
	tennis	hard	1	1	59	17	50472	33.3333	1400
	tennis	hard	1	1	59	18	50507.5	33.3333	1183.33
	tennis	hard	1	1	59	19	50542.5	33.3333	1166.67
	tennis	hard	1	1	59	20	50591	33.3333	1616.67
	tennis	hard	1	1	59	21	50620	33.3333	966.667
	tennis	hard	1	1	59	22	50656	33.3333	1200
	tennis	hard	1	1	60	1	52034.5	33.3333
	tennis	hard	1	1	61	1	52291.5	33.3333
	tennis	hard	1	1	62	1	52578	33.3333
	tennis	hard	1	1	62	2	52609.5	33.3333	1050
	tennis	hard	1	1	63	1	53204.5	33.3333
	tennis	hard	1	1	64	1	53513	33.3333
	tennis	hard	1	1	65	1	54135.5	33.3333
	tennis	hard	1	1	65	2	54156.5	33.3333	700
	tennis	hard	1	1	65	3	54209	33.3333	1750
	tennis	hard	1	1	65	4	54241.5	33.3333	1083.33
	tennis	hard	1	1	65	5	54293	33.3333	1716.67
	tennis	hard	1	1	65	6	54326.5	33.3333	1116.67
	tennis	hard	1	1	65	7	54384.5	33.3333	1933.33
	tennis	hard	1	1	66	1	55096.5	33.3333
	tennis	hard	1	1	67	1	55732.5	33.3333
	tennis	hard	1	1	67	2	55754	33.3333	716.667
	tennis	hard	1	1	67	3	55795.5	33.3333	1383.33
	tennis	hard	1	1	67	4	55828.5	33.3333	1100
	tennis	hard	1	1	67	5	55865	33.3333	1216.67
	tennis	hard	1	1	67	6	55908	33.3333	1433.33
	tennis	hard	1	1	67	7	55949	33.3333	1366.67
	tennis	hard	1	1	67	8	55988	33.3333	1300
	tennis	hard	1	1	67	9	56024	33.3333	1200
	tennis	hard	1	1	67	10	56069.5	33.3333	1516.67
	tennis	hard	1	1	67	11	56109	33.3333	1316.67
	tennis	hard	1	1	68	1	56840	33.3333
	tennis	hard	1	1	69	1	57122	33.3333
	tennis	hard	1	1	69	2	57153.5	33.3333	1050
	tennis	hard	1	1	69	3	57199.5	33.3333	1533.33
	tennis	hard	1	1	69	4	57234.5	33.3333	1166.67
	tennis	hard	1	1	69	5	57289	33.3333	1816.67
	tennis	hard	1	1	69	6	57324.5	33.3333	1183.33
	tennis	hard	1	1	69	7	57366	33.3333	1383.33
	tennis	hard	1	1	69	8	57402	33.3333	1200
	tennis	hard	1	1	70	1	58163	33.3333
	tennis	hard	1	1	70	2	58187	33.3333	800
	tennis	hard	1	1	70	3	58226	33.3333	1300
	tennis	hard	1	1	70	4	58265	33.3333	1300
	tennis	hard	1	1	71	1	58954	33.3333
	tennis	hard	1	1	72	1	59200	33.3333
	tennis	hard	1	1	72	2	59231.5	33.3333	1050
	tennis	hard	1	1	72	3	59272	33.3333	1350
	tennis	hard	1	1	72	4	59302.5	33.3333	1016.67
	tennis	hard	1	1	73	1	61140	33.3333
	tennis	hard	1	1	73	2	61161	33.3333	700
	tennis	hard	1	1	74	1	61848.5	33.3333
	tennis	hard	1	1	74	2	61870.5	33.3333	733.333
	tennis	hard	1	1	75	1	62538	33.3333
	tennis	hard	1	1	76	1	62913	33.3333
	tennis	hard	1	1	76	2	62938	33.3333	833.333
	tennis	hard	1	1	76	3	62975.5	33.3333	1250
	tennis	hard	1	1	76	4	63012	33.3333	1216.67
	tennis	hard	1	1	76	5	63045.5	33.3333	1116.67
	tennis	hard	1	1	77	1	63947	33.3333
	tennis	hard	1	1	77	2	63969.5	33.3333	750
	tennis	hard	1	1	77	3	64009	33.3333	1316.67
	tennis	hard	1	1	78	1	65034	33.3333
	tennis	hard	1	1	79	1	65406.5	33.3333
	tennis	hard	1	1	79	2	65430	33.3333	783.333
	tennis	hard	1	1	79	3	65463	33.3333	1100
	tennis	hard	1	1	79	4	65504	33.3333	1366.67
	tennis	hard	1	1	79	5	65538	33.3333	1133.33
	tennis	hard	1	1	79	6	65575.5	33.3333	1250
	tennis	hard	1	1	80	1	66460	33.3333
	tennis	hard	1	1	81	1	67533	33.3333
	tennis	hard	1	1	82	1	67801	33.3333
	tennis	hard	1	1	82	2	67832	33.3333	1033.33
	tennis	hard	1	1	83	1	68617.5	33.3333
	tennis	hard	1	1	83	2	68645	33.3333	916.667
	tennis	hard	1	1	83	3	68673	33.3333	933.333
	tennis	hard	1	1	83	4	68727.5	33.3333	1816.67
	tennis	hard	1	1	83	5	68753	33.3333	850
	tennis	hard	1	1	84	1	69400.5	33.3333
	tennis	hard	1	1	84	2	69428	33.3333	916.667
	tennis	hard	1	1	84	3	69466.5	33.3333	1283.33
	tennis	hard	1	1	84	4	69500.5	33.3333	1133.33
	tennis	hard	1	1	85	1	70140	33.3333
	tennis	hard	1	1	85	2	70162	33.3333	733.333
	tennis	hard	1	1	85	3	70210	33.3333	1600
	tennis	hard	1	1	86	1	70768	33.3333
	tennis	hard	1	1	87	1	72001.5	33.3333
	tennis	hard	1	1	87	2	72027	33.3333	850
	tennis	hard	1	1	87	3	72078.5	33.3333	1716.67
	tennis	hard	1	1	87	4	72113.5	33.3333	1166.67
	tennis	hard	1	1	87	5	72148.5	33.3333	1166.67
	tennis	hard	1	1	87	6	72190.5	33.3333	1400
	tennis	hard	1	1	87	7	72219.5	33.3333	966.667
	tennis	hard	1	1	87	8	72259	33.3333	1316.67
	tennis	hard	1	1	87	9	72305	33.3333	1533.33
	tennis	hard	1	1	87	10	72344	33.3333	1300
	tennis	hard	1	1	87	11	72378	33.3333	1133.33
	tennis	hard	1	1	87	12	72423	33.3333	1500
	tennis	hard	1	1	87	13	72459	33.3333	1200
	tennis	hard	1	1	87	14	72497	33.3333	1266.67
	tennis	hard	1	1	87	15	72529.5	33.3333	1083.33
	tennis	hard	1	1	87	16	72569	33.3333	1316.67
	tennis	hard	1	1	87	17	72598.5	33.3333	983.333
	tennis	hard	1	1	87	18	72633	33.3333	1150
	tennis	hard	1	1	87	19	72675	33.3333	1400
	tennis	hard	1	1	87	20	72714	33.3333	1300
	tennis	hard	1	1	87	21	72749	33.3333	1166.67
	tennis	hard	1	1	87	22	72787.5	33.3333	1283.33
	tennis	hard	1	1	87	23	72825.5	33.3333	1266.67
	tennis	hard	1	1	87	24	72860	33.3333	1150
	tennis	hard	1	1	87	25	72893.5	33.3333	1116.67
	tennis	hard	1	1	87	26	72933.5	33.3333	1333.33
	tennis	hard	1	1	87	27	72964	33.3333	1016.67
	tennis	hard	1	1	87	28	73002	33.3333	1266.67
	tennis	hard	1	1	87	29	73039	33.3333	1233.33
	tennis	hard	1	1	87	30	73071.5	33.3333	1083.33
	tennis	hard	1	1	87	31	73110	33.3333	1283.33
	tennis	hard	1	1	87	32	73141.5	33.3333	1050
	tennis	hard	1	1	87	33	73191	33.3333	1650
	tennis	hard	1	1	87	34	73240.5	33.3333	1650
	tennis	hard	1	1	88	1	74327.5	33.3333
	tennis	hard	1	1	88	2	74349.5	33.3333	733.333
	tennis	hard	1	1	88	3	74380.5	33.3333	1033.33
	tennis	hard	1	1	88	4	74418.5	33.3333	1266.67
	tennis	hard	1	1	88	5	74461	33.3333	1416.67
	tennis	hard	1	1	88	6	74506	33.3333	1500
	tennis	hard	1	1	89	1	75446	33.3333
	tennis	hard	1	1	90	1	75793.5	33.3333
	tennis	hard	1	1	90	2	75826.5	33.3333	1100
	tennis	hard	1	1	90	3	75874	33.3333	1583.33
	tennis	hard	1	1	90	4	75905	33.3333	1033.33
	tennis	hard	1	1	91	1	76691	33.3333
	tennis	hard	1	1	92	1	77144.5	33.3333
	tennis	hard	1	1	92	2	77167	33.3333	750
	tennis	hard	1	1	92	3	77205.5	33.3333	1283.33
	tennis	hard	1	1	92	4	77237.5	33.3333	1066.67
	tennis	hard	1	1	92	5	77272	33.3333	1150
	tennis	hard	1	1	93	1	78227.5	33.3333
	tennis	hard	1	1	93	2	78250	33.3333	750
	tennis	hard	1	1	93	3	78285.5	33.3333	1183.33
	tennis	hard	1	1	93	4	78323.5	33.3333	1266.67
	tennis	hard	1	1	93	5	78352.5	33.3333	966.667
	tennis	hard	1	1	94	1	79360.5	33.3333
	tennis	hard	1	1	94	2	79383	33.3333	750
	tennis	hard	1	1	95	1	80467	33.3333
	tennis	hard	1	1	96	1	80715	33.3333
	tennis	hard	1	1	96	2	80744.5	33.3333	983.333
	tennis	hard	1	1	96	3	80781	33.3333	1216.67
	tennis	hard	1	1	96	4	80815	33.3333	1133.33
	tennis	hard	1	1	96	5	80866	33.3333	1700
	tennis	hard	1	1	96	6	80902	33.3333	1200
	tennis	hard	1	1	96	7	80939.5	33.3333	1250
	tennis	hard	1	1	96	8	80977.5	33.3333	1266.67
	tennis	hard	1	1	96	9	81021.5	33.3333	1466.67
	tennis	hard	1	1	96	10	81053.5	33.3333	1066.67
	tennis	hard	1	1	96	11	81095.5	33.3333	1400
	tennis	hard	1	1	96	12	81134.5	33.3333	1300
	tennis	hard	1	1	96	13	81173	33.3333	1283.33
	tennis	hard	1	1	96	14	81207.5	33.3333	1150
	tennis	hard	1	1	96	15	81253	33.3333	1516.67
	tennis	hard	1	1	96	16	81295.5	33.3333	1416.67
	tennis	hard	1	1	96	17	81349	33.3333	1783.33
	tennis	hard	1	1	97	1	82578.5	33.3333
	tennis	hard	1	1	98	1	82930	33.3333
	tennis	hard	1	1	98	2	82964	33.3333	1133.33
	tennis	hard	1	1	98	3	83003.5	33.3333	1316.67
	tennis	hard	1	1	98	4	83042.5	33.3333	1300
	tennis	hard	1	1	98	5	83084.5	33.3333	1400
	tennis	hard	1	1	98	6	83120.5	33.3333	1200
	tennis	hard	1	1	98	7	83157.5	33.3333	1233.33
	tennis	hard	1	1	99	1	84201.5	33.3333
	tennis	hard	1	1	100	1	84542	33.3333
	tennis	hard	1	1	100	2	84573	33.3333	1033.33
	tennis	hard	1	1	100	3	84618.5	33.3333	1516.67
	tennis	hard	1	1	100	4	84655	33.3333	1216.67
	tennis	hard	1	1	101	1	85454	33.3333
	tennis	hard	1	1	101	2	85475.5	33.3333	716.667
	tennis	hard	1	1	101	3	85527.5	33.3333	1733.33
	tennis	hard	1	1	101	4	85552	33.3333	816.667
	tennis	hard	1	1	101	5	85575	33.3333	766.667
	tennis	hard	1	1	102	1	86340	33.3333
	tennis	hard	1	1	103	1	86595	33.3333
	tennis	hard	1	1	103	2	86624.5	33.3333	983.333
	tennis	hard	1	1	103	3	86671.5	33.3333	1566.67
	tennis	hard	1	1	103	4	86709	33.3333	1250
	tennis	hard	1	1	103	5	86746	33.3333	1233.33
	tennis	hard	1	1	103	6	86777.5	33.3333	1050
	tennis	hard	1	1	103	7	86814	33.3333	1216.67
	tennis	hard	1	1	103	8	86859	33.3333	1500
	tennis	hard	1	1	103	9	86899	33.3333	1333.33
	tennis	hard	1	1	104	1	88049	33.3333
	tennis	hard	1	1	104	2	88072	33.3333	766.667
	tennis	hard	1	1	104	3	88108.5	33.3333	1216.67
	tennis	hard	1	1	104	4	88150	33.3333	1383.33
	tennis	hard	1	1	104	5	88179.5	33.3333	983.333
	tennis	hard	1	1	104	6	88224	33.3333	1483.33
	tennis	hard	1	1	104	7	88258	33.3333	1133.33
	tennis	hard	1	1	104	8	88297	33.3333	1300
	tennis	hard	1	1	104	9	88335	33.3333	1266.67
	tennis	hard	1	1	104	10	88378	33.3333	1433.33
	tennis	hard	1	1	104	11	88410.5	33.3333	1083.33
	tennis	hard	1	1	104	12	88448	33.3333	1250
	tennis	hard	1	1	104	13	88488.5	33.3333	1350
	tennis	hard	1	1	104	14	88527.5	33.3333	1300
	tennis	hard	1	1	105	1	91131	33.3333
	tennis	hard	1	1	105	2	91151.5	33.3333	683.333
	tennis	hard	1	1	105	3	91185.5	33.3333	1133.33
	tennis	hard	1	1	106	1	92099.5	33.3333
	tennis	hard	1	1	107	1	92350.5	33.3333
	tennis	hard	1	1	107	2	92383	33.3333	1083.33
	tennis	hard	1	1	107	3	92418.5	33.3333	1183.33
	tennis	hard	1	1	107	4	92447	33.3333	950
	tennis	hard	1	1	107	5	92489	33.3333	1400
	tennis	hard	1	1	107	6	92521	33.3333	1066.67
	tennis	hard	1	1	107	7	92571	33.3333	1666.67
	tennis	hard	1	1	107	8	92630.5	33.3333	1983.33
	tennis	hard	1	1	107	9	92645	33.3333	483.333
	tennis	hard	1	1	108	1	93484	33.3333
	tennis	hard	1	1	109	1	93747.5	33.3333
	tennis	hard	1	1	109	2	93778.5	33.3333	1033.33
	tennis	hard	1	1	110	1	95005	33.3333
	tennis	hard	1	1	110	2	95027.5	33.3333	750
	tennis	hard	1	1	110	3	95068	33.3333	1350
	tennis	hard	1	1	110	4	95099	33.3333	1033.33
	tennis	hard	1	1	111	1	96115	33.3333
	tennis	hard	1	1	112	1	96657.5	33.3333
	tennis	hard	1	1	112	2	96688.5	33.3333	1033.33
	tennis	hard	1	1	112	3	96726	33.3333	1250
	tennis	hard	1	1	112	4	96764	33.3333	1266.67
	tennis	hard	1	1	112	5	96805	33.3333	1366.67
	tennis	hard	1	1	112	6	96837	33.3333	1066.67
	tennis	hard	1	1	112	7	96873.5	33.3333	1216.67
	tennis	hard	1	1	112	8	96916	33.3333	1416.67
	tennis	hard	1	1	112	9	96950	33.3333	1133.33
	tennis	hard	1	1	112	10	96980.5	33.3333	1016.67
	tennis	hard	1	1	112	11	97027	33.3333	1550
	tennis	hard	1	1	112	12	97064	33.3333	1233.33
	tennis	hard	1	1	112	13	97104	33.3333	1333.33
	tennis	hard	1	1	112	14	97142.5	33.3333	1283.33
	tennis	hard	1	2	113	1	102208	33.3333
	tennis	hard	1	2	113	2	102229	33.3333	700
	tennis	hard	1	2	113	3	102266	33.3333	1233.33
	tennis	hard	1	2	113	4	102298	33.3333	1066.67
	tennis	hard	1	2	113	5	102342	33.3333	1483.33
	tennis	hard	1	2	113	6	102382	33.3333	1316.67
	tennis	hard	1	2	113	7	102414	33.3333	1050
	tennis	hard	1	2	113	8	102456	33.3333	1416.67
	tennis	hard	1	2	113	9	102485	33.3333	966.667
	tennis	hard	1	2	113	10	102521	33.3333	1200
	tennis	hard	1	2	113	11	102558	33.3333	1250
	tennis	hard	1	2	114	1	103446	33.3333
	tennis	hard	1	2	115	1	103779	33.3333
	tennis	hard	1	2	115	2	103817	33.3333	1266.67
	tennis	hard	1	2	115	3	103854	33.3333	1216.67
	tennis	hard	1	2	115	4	103904	33.3333	1683.33
	tennis	hard	1	2	115	5	103944	33.3333	1350
	tennis	hard	1	2	115	6	103982	33.3333	1266.67
	tennis	hard	1	2	115	7	104020	33.3333	1266.67
	tennis	hard	1	2	115	8	104055	33.3333	1150
	tennis	hard	1	2	115	9	104092	33.3333	1216.67
	tennis	hard	1	2	115	10	104139	33.3333	1583.33
	tennis	hard	1	2	115	11	104172	33.3333	1116.67
	tennis	hard	1	2	115	12	104206	33.3333	1133.33
	tennis	hard	1	2	115	13	104242	33.3333	1200
	tennis	hard	1	2	115	14	104282	33.3333	1333.33
	tennis	hard	1	2	116	1	105258	33.3333
	tennis	hard	1	2	116	2	105278	33.3333	666.667
	tennis	hard	1	2	117	1	105970	33.3333
	tennis	hard	1	2	117	2	105993	33.3333	750
	tennis	hard	1	2	117	3	106026	33.3333	1100
	tennis	hard	1	2	117	4	106070	33.3333	1450
	tennis	hard	1	2	117	5	106098	33.3333	950
	tennis	hard	1	2	118	1	106976	33.3333
	tennis	hard	1	2	118	2	106997	33.3333	716.667
	tennis	hard	1	2	118	3	107032	33.3333	1150
	tennis	hard	1	2	118	4	107078	33.3333	1550
	tennis	hard	1	2	118	5	107109	33.3333	1033.33
	tennis	hard	1	2	118	6	107162	33.3333	1783.33
	tennis	hard	1	2	118	7	107206	33.3333	1450
	tennis	hard	1	2	118	8	107246	33.3333	1350
	tennis	hard	1	2	118	9	107280	33.3333	1100
	tennis	hard	1	2	118	10	107322	33.3333	1416.67
	tennis	hard	1	2	118	11	107368	33.3333	1516.67
	tennis	hard	1	2	118	12	107404	33.3333	1216.67
	tennis	hard	1	2	118	13	107436	33.3333	1083.33
	tennis	hard	1	2	118	14	107483	33.3333	1550
	tennis	hard	1	2	118	15	107516	33.3333	1100
	tennis	hard	1	2	118	16	107564	33.3333	1600
	tennis	hard	1	2	118	17	107594	33.3333	1000
	tennis	hard	1	2	118	18	107634	33.3333	1333.33
	tennis	hard	1	2	119	1	108652	33.3333
	tennis	hard	1	2	120	1	109353	33.3333
	tennis	hard	1	2	120	2	109378	33.3333	833.333
	tennis	hard	1	2	120	3	109418	33.3333	1333.33
	tennis	hard	1	2	120	4	109451	33.3333	1100
	tennis	hard	1	2	120	5	109500	33.3333	1650
	tennis	hard	1	2	120	6	109535	33.3333	1150
	tennis	hard	1	2	120	7	109582	33.3333	1550
	tennis	hard	1	2	120	8	109616	33.3333	1150
	tennis	hard	1	2	120	9	109674	33.3333	1916.67
	tennis	hard	1	2	120	10	109712	33.3333	1300
	tennis	hard	1	2	120	11	109748	33.3333	1166.67
	tennis	hard	1	2	121	1	117424	33.3333
	tennis	hard	1	2	121	2	117448	33.3333	766.667
	tennis	hard	1	2	121	3	117497	33.3333	1650
	tennis	hard	1	2	121	4	117529	33.3333	1066.67
	tennis	hard	1	2	121	5	117569	33.3333	1333.33
	tennis	hard	1	2	121	6	117603	33.3333	1133.33
	tennis	hard	1	2	121	7	117648	33.3333	1516.67
	tennis	hard	1	2	122	1	118220	33.3333
	tennis	hard	1	2	123	1	118465	33.3333
	tennis	hard	1	2	123	2	118499	33.3333	1133.33
	tennis	hard	1	2	123	3	118535	33.3333	1200
	tennis	hard	1	2	123	4	118583	33.3333	1600
	tennis	hard	1	2	123	5	118619	33.3333	1200
	tennis	hard	1	2	123	6	118654	33.3333	1183.33
	tennis	hard	1	2	123	7	118687	33.3333	1083.33
	tennis	hard	1	2	123	8	118716	33.3333	983.333
	tennis	hard	1	2	123	9	118760	33.3333	1450
	tennis	hard	1	2	123	10	118798	33.3333	1266.67
	tennis	hard	1	2	123	11	118832	33.3333	1116.67
	tennis	hard	1	2	123	12	118873	33.3333	1383.33
	tennis	hard	1	2	123	13	118913	33.3333	1333.33
	tennis	hard	1	2	123	14	118959	33.3333	1533.33
	tennis	hard	1	2	123	15	118992	33.3333	1100
	tennis	hard	1	2	123	16	119026	33.3333	1116.67
	tennis	hard	1	2	124	1	119690	33.3333
	tennis	hard	1	2	124	2	119722	33.3333	1050
	tennis	hard	1	2	125	1	120313	33.3333
	tennis	hard	1	2	126	1	120582	33.3333
	tennis	hard	1	2	126	2	120615	33.3333	1100
	tennis	hard	1	2	127	1	121298	33.3333
	tennis	hard	1	2	127	2	121322	33.3333	783.333
	tennis	hard	1	2	127	3	121358	33.3333	1216.67
	tennis	hard	1	2	127	4	121426	33.3333	2250
	tennis	hard	1	2	127	5	121440	33.3333	466.667
	tennis	hard	1	2	127	6	121484	33.3333	1483.33
	tennis	hard	1	2	127	7	121498	33.3333	450
	tennis	hard	1	2	128	1	123132	33.3333
	tennis	hard	1	2	128	2	123151	33.3333	633.333
	tennis	hard	1	2	128	3	123189	33.3333	1266.67
	tennis	hard	1	2	128	4	123220	33.3333	1033.33
	tennis	hard	1	2	128	5	123253	33.3333	1100
	tennis	hard	1	2	128	6	123290	33.3333	1250
	tennis	hard	1	2	128	7	123335	33.3333	1483.33
	tennis	hard	1	2	129	1	124082	33.3333
	tennis	hard	1	2	129	2	124104	33.3333	716.667
	tennis	hard	1	2	130	1	124669	33.3333
	tennis	hard	1	2	131	1	125020	33.3333
	tennis	hard	1	2	131	2	125042	33.3333	750
	tennis	hard	1	2	132	1	125741	33.3333
	tennis	hard	1	2	133	1	126094	33.3333
	tennis	hard	1	2	133	2	126116	33.3333	750
	tennis	hard	1	2	134	1	127776	33.3333
	tennis	hard	1	2	135	1	128016	33.3333
	tennis	hard	1	2	135	2	128042	33.3333	900
	tennis	hard	1	2	135	3	128086	33.3333	1450
	tennis	hard	1	2	135	4	128118	33.3333	1066.67
	tennis	hard	1	2	135	5	128170	33.3333	1733.33
	tennis	hard	1	2	135	6	128207	33.3333	1233.33
	tennis	hard	1	2	135	7	128244	33.3333	1233.33
	tennis	hard	1	2	135	8	128278	33.3333	1150
	tennis	hard	1	2	135	9	128328	33.3333	1650
	tennis	hard	1	2	135	10	128362	33.3333	1150
	tennis	hard	1	2	136	1	129082	33.3333
	tennis	hard	1	2	136	2	129104	33.3333	750
	tennis	hard	1	2	136	3	129137	33.3333	1083.33
	tennis	hard	1	2	136	4	129182	33.3333	1483.33
	tennis	hard	1	2	136	5	129219	33.3333	1250
	tennis	hard	1	2	136	6	129251	33.3333	1066.67
	tennis	hard	1	2	136	7	129290	33.3333	1300
	tennis	hard	1	2	136	8	129334	33.3333	1450
	tennis	hard	1	2	136	9	129368	33.3333	1150
	tennis	hard	1	2	137	1	130158	33.3333
	tennis	hard	1	2	137	2	130180	33.3333	750
	tennis	hard	1	2	137	3	130230	33.3333	1650
	tennis	hard	1	2	137	4	130263	33.3333	1100
	tennis	hard	1	2	137	5	130308	33.3333	1500
	tennis	hard	1	2	137	6	130344	33.3333	1200
	tennis	hard	1	2	137	7	130384	33.3333	1350
	tennis	hard	1	2	137	8	130425	33.3333	1350
	tennis	hard	1	2	138	1	131140	33.3333
	tennis	hard	1	2	139	1	131410	33.3333
	tennis	hard	1	2	139	2	131436	33.3333	883.333
	tennis	hard	1	2	139	3	131474	33.3333	1250
	tennis	hard	1	2	139	4	131505	33.3333	1033.33
	tennis	hard	1	2	140	1	132203	33.3333
	tennis	hard	1	2	141	1	132484	33.3333
	tennis	hard	1	2	141	2	132513	33.3333	966.667
	tennis	hard	1	2	141	3	132550	33.3333	1233.33
	tennis	hard	1	2	141	4	132582	33.3333	1066.67
	tennis	hard	1	2	141	5	132625	33.3333	1433.33
	tennis	hard	1	2	141	6	132662	33.3333	1250
	tennis	hard	1	2	141	7	132699	33.3333	1216.67
	tennis	hard	1	2	141	8	132732	33.3333	1100
	tennis	hard	1	2	141	9	132769	33.3333	1233.33
	tennis	hard	1	2	141	10	132807	33.3333	1266.67
	tennis	hard	1	2	141	11	132842	33.3333	1150
	tennis	hard	1	2	141	12	132882	33.3333	1350
	tennis	hard	1	2	141	13	132918	33.3333	1216.67
	tennis	hard	1	2	142	1	133682	33.3333
	tennis	hard	1	2	142	2	133705	33.3333	766.667
	tennis	hard	1	2	143	1	134393	33.3333
	tennis	hard	1	2	144	1	134680	33.3333
	tennis	hard	1	2	144	2	134710	33.3333	1016.67
	tennis	hard	1	2	144	3	134746	33.3333	1183.33
	tennis	hard	1	2	144	4	134780	33.3333	1133.33
	tennis	hard	1	2	144	5	134825	33.3333	1500
	tennis	hard	1	2	144	6	134876	33.3333	1700
	tennis	hard	1	2	144	7	134910	33.3333	1150
	tennis	hard	1	2	144	8	134942	33.3333	1066.67
	tennis	hard	1	2	144	9	134981	33.3333	1283.33
	tennis	hard	1	2	144	10	135032	33.3333	1700
	tennis	hard	1	2	145	1	135868	33.3333
	tennis	hard	1	2	146	1	136204	33.3333
	tennis	hard	1	2	147	1	136468	33.3333
	tennis	hard	1	2	147	2	136498	33.3333	1033.33
	tennis	hard	1	2	147	3	136542	33.3333	1450
	tennis	hard	1	2	147	4	136575	33.3333	1100
	tennis	hard	1	2	147	5	136697	33.3333	4066.67
	tennis	hard	1	2	148	1	137544	33.3333
	tennis	hard	1	2	148	2	137570	33.3333	883.333
	tennis	hard	1	2	148	3	137607	33.3333	1233.33
	tennis	hard	1	2	148	4	137645	33.3333	1266.67
	tennis	hard	1	2	148	5	137700	33.3333	1850
	tennis	hard	1	2	148	6	137749	33.3333	1616.67
	tennis	hard	1	2	149	1	138603	33.3333
	tennis	hard	1	2	149	2	138625	33.3333	733.333
	tennis	hard	1	2	149	3	138684	33.3333	1966.67
	tennis	hard	1	2	150	1	139377	33.3333
	tennis	hard	1	2	151	1	140000	33.3333
	tennis	hard	1	2	151	2	140023	33.3333	766.667
	tennis	hard	1	2	151	3	140066	33.3333	1416.67
	tennis	hard	1	2	151	4	140099	33.3333	1116.67
	tennis	hard	1	2	152	1	140898	33.3333
	tennis	hard	1	2	153	1	141313	33.3333
	tennis	hard	1	2	153	2	141336	33.3333	750
	tennis	hard	1	2	153	3	141380	33.3333	1466.67
	tennis	hard	1	2	154	1	142026	33.3333
	tennis	hard	1	2	154	2	142054	33.3333	933.333
	tennis	hard	1	2	154	3	142088	33.3333	1133.33
	tennis	hard	1	2	154	4	142122	33.3333	1150
	tennis	hard	1	2	154	5	142162	33.3333	1333.33
	tennis	hard	1	2	154	6	142196	33.3333	1100
	tennis	hard	1	2	154	7	142228	33.3333	1083.33
	tennis	hard	1	2	154	8	142259	33.3333	1033.33
	tennis	hard	1	2	154	9	142293	33.3333	1133.33
	tennis	hard	1	2	155	1	143979	33.3333
	tennis	hard	1	2	156	1	144355	33.3333
	tennis	hard	1	2	156	2	144381	33.3333	866.667
	tennis	hard	1	2	156	3	144428	33.3333	1583.33
	tennis	hard	1	2	156	4	144472	33.3333	1450
	tennis	hard	1	2	157	1	145209	33.3333
	tennis	hard	1	2	157	2	145231	33.3333	733.333
	tennis	hard	1	2	157	3	145285	33.3333	1800
	tennis	hard	1	2	157	4	145324	33.3333	1300
	tennis	hard	1	2	157	5	145376	33.3333	1750
	tennis	hard	1	2	157	6	145413	33.3333	1216.67
	tennis	hard	1	2	158	1	146119	33.3333
	tennis	hard	1	2	159	1	146464	33.3333
	tennis	hard	1	2	159	2	146489	33.3333	833.333
	tennis	hard	1	2	159	3	146524	33.3333	1183.33
	tennis	hard	1	2	159	4	146565	33.3333	1350
	tennis	hard	1	2	159	5	146600	33.3333	1166.67
	tennis	hard	1	2	159	6	146641	33.3333	1366.67
	tennis	hard	1	2	159	7	146680	33.3333	1316.67
	tennis	hard	1	2	160	1	147588	33.3333
	tennis	hard	1	2	161	1	149040	33.3333
	tennis	hard	1	2	161	2	149070	33.3333	1000
	tennis	hard	1	2	161	3	149108	33.3333	1250
	tennis	hard	1	2	162	1	149768	33.3333
	tennis	hard	1	2	162	2	149790	33.3333	733.333
	tennis	hard	1	2	162	3	149829	33.3333	1300
	tennis	hard	1	2	163	1	150558	33.3333
	tennis	hard	1	2	163	2	150586	33.3333	900
	tennis	hard	1	2	163	3	150614	33.3333	933.333
	tennis	hard	1	2	164	1	151280	33.3333
	tennis	hard	1	2	164	2	151304	33.3333	833.333
	tennis	hard	1	2	164	3	151351	33.3333	1550
	tennis	hard	1	2	164	4	151377	33.3333	866.667
	tennis	hard	1	2	164	5	151404	33.3333	900
	tennis	hard	1	2	164	6	151464	33.3333	2016.67
	tennis	hard	1	2	165	1	152361	33.3333
	tennis	hard	1	2	165	2	152388	33.3333	900
	tennis	hard	1	2	165	3	152434	33.3333	1550
	tennis	hard	1	2	165	4	152460	33.3333	850
	tennis	hard	1	2	166	1	153161	33.3333
	tennis	hard	1	2	167	1	153430	33.3333
	tennis	hard	1	2	167	2	153461	33.3333	1050
	tennis	hard	1	2	167	3	153496	33.3333	1166.67
	tennis	hard	1	2	167	4	153531	33.3333	1166.67
	tennis	hard	1	2	167	5	153562	33.3333	1016.67
	tennis	hard	1	2	167	6	153608	33.3333	1533.33
	tennis	hard	1	2	167	7	153641	33.3333	1116.67
	tennis	hard	1	2	167	8	153690	33.3333	1650
	tennis	hard	1	2	167	9	153736	33.3333	1500
	tennis	hard	1	2	167	10	153769	33.3333	1116.67
	tennis	hard	1	2	167	11	153813	33.3333	1466.67
	tennis	hard	1	2	167	12	153848	33.3333	1166.67
	tennis	hard	1	2	167	13	153884	33.3333	1200
	tennis	hard	1	2	167	14	153919	33.3333	1166.67
	tennis	hard	1	2	167	15	153958	33.3333	1300
	tennis	hard	1	2	167	16	154005	33.3333	1566.67
	tennis	hard	1	2	167	17	154059	33.3333	1800
	tennis	hard	1	2	167	18	154099	33.3333	1333.33
	tennis	hard	1	2	167	19	154138	33.3333	1300
	tennis	hard	1	2	167	20	154180	33.3333	1400
	tennis	hard	1	2	168	1	155666	33.3333
	tennis	hard	1	2	169	1	156049	33.3333
	tennis	hard	1	2	169	2	156081	33.3333	1066.67
	tennis	hard	1	2	169	3	156122	33.3333	1366.67
	tennis	hard	1	2	169	4	156151	33.3333	966.667
	tennis	hard	1	2	170	1	156854	33.3333
	tennis	hard	1	2	170	2	156874	33.3333	683.333
	tennis	hard	1	2	171	1	157562	33.3333
	tennis	hard	1	2	172	1	157939	33.3333
	tennis	hard	1	2	173	1	158846	33.3333
	tennis	hard	1	2	173	2	158870	33.3333	783.333
	tennis	hard	1	2	173	3	158925	33.3333	1850
	tennis	hard	1	2	173	4	158955	33.3333	1000
	tennis	hard	1	2	174	1	159598	33.3333
	tennis	hard	1	2	174	2	159616	33.3333	616.667
	tennis	hard	1	2	175	1	161390	33.3333
	tennis	hard	1	2	175	2	161416	33.3333	866.667
	tennis	hard	1	2	175	3	161461	33.3333	1500
	tennis	hard	1	2	175	4	161496	33.3333	1166.67
	tennis	hard	1	2	175	5	161532	33.3333	1200
	tennis	hard	1	2	175	6	161575	33.3333	1433.33
	tennis	hard	1	2	175	7	161613	33.3333	1266.67
	tennis	hard	1	2	175	8	161652	33.3333	1300
	tennis	hard	1	2	175	9	161722	33.3333	2350
	tennis	hard	1	2	176	1	162333	33.3333
	tennis	hard	1	2	176	2	162354	33.3333	700
	tennis	hard	1	2	176	3	162386	33.3333	1066.67
[truncated: 5,812 more rows]

## Sheet: Cricket__BowlSpeed
Loffing, F.: Left-handedness and time pressure in elite interactive ball games @ Biology Letters
Cricket - Twenty20 World Cup 2007 (South Africa)
(data courtesy by Hawk-Eye Innovations; data was obtained in October 2007 as part of a research project on laterality in sports funded by the German Research Foundation DFG [HA 4361/5-1])
Missing data:		game 5, inning 1											approx. distance between ball release and ball-bat-contact (in m):	18
		game 22, inning 2
		game 25, inning 25
										bowl_speed (initially measured in mph)				estimated ball flight time	d_eBFT_to_md-eBFT
game	round	winner	runner_up	won_by	place	inning	over	ball	bowl_type	mph	kph	m/s	exclude (0=no, 1=yes)	eBFT_in_ms
1	group stage	SouthAfrica	WestIndies	8_wickets	Johannesburg	1	1	1	pace	80.234	129.124	35.8678	0	501.843	9.35958
1	group stage	SouthAfrica	WestIndies	8_wickets	Johannesburg	1	1	2	pace	78.032	125.58	34.8834	0	516.004	4.80202
1	group stage	SouthAfrica	WestIndies	8_wickets	Johannesburg	1	1	3	pace	78.53	126.382	35.1061	0	512.732	1.52977		Occurrence of different bowl type deliveries
1	group stage	SouthAfrica	WestIndies	8_wickets	Johannesburg	1	1	4	pace	77.621	124.919	34.6997	0	518.737	7.53424
1	group stage	SouthAfrica	WestIndies	8_wickets	Johannesburg	1	1	5	pace	79.299	127.619	35.4498	0	507.76	3.44244			n	%
1	group stage	SouthAfrica	WestIndies	8_wickets	Johannesburg	1	1	6	pace	77.516	124.75	34.6528	0	519.439	8.2369		spin	1261	22.546
1	group stage	SouthAfrica	WestIndies	8_wickets	Johannesburg	1	2	1	pace	82.961	133.513	37.0869	0	485.347	25.8556		pace	4332	77.454
1	group stage	SouthAfrica	WestIndies	8_wickets	Johannesburg	1	2	2	pace	84.521	136.023	37.7843	0	476.389	34.8136
1	group stage	SouthAfrica	WestIndies	8_wickets	Johannesburg	1	2	3	pace	83.877	134.987	37.4964	0	480.046	31.1559
1	group stage	SouthAfrica	WestIndies	8_wickets	Johannesburg	1	2	4	pace	84.575	136.11	37.8084	0	476.085	35.1178		Bowl speeds measured and estimated ball flight time (eBFT)
1	group stage	SouthAfrica	WestIndies	8_wickets	Johannesburg	1	2	5	pace	84.207	135.518	37.6439	0	478.165	33.0372		(11 measurements excluded based on visual inspection of bowl speeds under consideration of bowl type)
1	group stage	SouthAfrica	WestIndies	8_wickets	Johannesburg	1	2	6	pace	83.838	134.924	37.4789	0	480.27	30.9326
1	group stage	SouthAfrica	WestIndies	8_wickets	Johannesburg	1	3	1	pace	77.956	125.458	34.8495	0	516.507	5.30508		n (valid)	5652
1	group stage	SouthAfrica	WestIndies	8_wickets	Johannesburg	1	3	2	pace	74.215	119.437	33.1771	0	542.543	31.341
1	group stage	SouthAfrica	WestIndies	8_wickets	Johannesburg	1	3	3	pace	78.628	126.54	35.1499	0	512.093	0.89071			mph	kph	m/s	eBFT (ms)
1	group stage	SouthAfrica	WestIndies	8_wickets	Johannesburg	1	3	4	pace	79.583	128.076	35.5768	0	505.948	5.25443		min	37.189	59.8499	16.625	381.542
1	group stage	SouthAfrica	WestIndies	8_wickets	Johannesburg	1	3	5	pace	81.306	130.849	36.347	0	495.226	15.9763		max	105.532	169.837	47.177	1082.71
1	group stage	SouthAfrica	WestIndies	8_wickets	Johannesburg	1	3	6	pace	70.64	113.684	31.5789	0	570.001	58.7984		median	78.765	126.76	35.2111	511.202
1	group stage	SouthAfrica	WestIndies	8_wickets	Johannesburg	1	3	7	pace	75.147	120.937	33.5937	0	535.815	24.6122		mean	74.6778	120.182	33.384	555.657
1	group stage	SouthAfrica	WestIndies	8_wickets	Johannesburg	1	4	1	pace	84.875	136.593	37.9425	0	474.402	36.8005		sd	11.8502	19.071	5.2975	105.371
1	group stage	SouthAfrica	WestIndies	8_wickets	Johannesburg	1	4	2	pace	85.462	137.538	38.2049	0	471.143	40.059		95%-CI	0.309005	0.497295	0.138137	2.74765
1	group stage	SouthAfrica	WestIndies	8_wickets	Johannesburg	1	4	3	pace	85.557	137.691	38.2474	0	470.62	40.5821		MAD				40.6976
1	group stage	SouthAfrica	WestIndies	8_wickets	Johannesburg	1	4	4	pace	86.802	139.694	38.804	0	463.87	47.3322
1	group stage	SouthAfrica	WestIndies	8_wickets	Johannesburg	1	4	5	pace	84.538	136.051	37.7919	0	476.293	34.9094
1	group stage	SouthAfrica	WestIndies	8_wickets	Johannesburg	1	4	6	pace	85.131	137.005	38.057	0	472.975	38.2271
1	group stage	SouthAfrica	WestIndies	8_wickets	Johannesburg	1	5	1	pace	83.916	135.05	37.5138	0	479.823	31.379
1	group stage	SouthAfrica	WestIndies	8_wickets	Johannesburg	1	5	2	pace	86.027	138.447	38.4575	0	468.049	43.1533
1	group stage	SouthAfrica	WestIndies	8_wickets	Johannesburg	1	5	3	pace	88.949	143.15	39.7638	0	452.673	58.5289
1	group stage	SouthAfrica	WestIndies	8_wickets	Johannesburg	1	5	4	pace	84.088	135.327	37.5907	0	478.842	32.3605
1	group stage	SouthAfrica	WestIndies	8_wickets	Johannesburg	1	5	5	pace	84.78	136.44	37.9001	0	474.933	36.269
1	group stage	SouthAfrica	WestIndies	8_wickets	Johannesburg	1	5	6	pace	78.573	126.451	35.1253	0	512.452	1.24917
1	group stage	SouthAfrica	WestIndies	8_wickets	Johannesburg	1	6	1	pace	87.213	140.356	38.9877	0	461.684	49.5183
1	group stage	SouthAfrica	WestIndies	8_wickets	Johannesburg	1	6	2	pace	91.463	147.195	40.8876	0	440.231	70.9713
1	group stage	SouthAfrica	WestIndies	8_wickets	Johannesburg	1	6	3	pace	87.23	140.383	38.9953	0	461.594	49.6083
1	group stage	SouthAfrica	WestIndies	8_wickets	Johannesburg	1	6	4	pace	89.185	143.529	39.8693	0	451.476	59.7267
1	group stage	SouthAfrica	WestIndies	8_wickets	Johannesburg	1	6	5	pace	89.139	143.455	39.8487	0	451.709	59.4937
1	group stage	SouthAfrica	WestIndies	8_wickets	Johannesburg	1	6	6	pace	89.261	143.652	39.9032	0	451.091	60.1111
1	group stage	SouthAfrica	WestIndies	8_wickets	Johannesburg	1	7	1	pace	84.275	135.627	37.6743	0	477.779	33.423
1	group stage	SouthAfrica	WestIndies	8_wickets	Johannesburg	1	7	2	pace	83.687	134.681	37.4114	0	481.136	30.0661
1	group stage	SouthAfrica	WestIndies	8_wickets	Johannesburg	1	7	3	pace	75.684	121.802	33.8338	0	532.013	20.8104
1	group stage	SouthAfrica	WestIndies	8_wickets	Johannesburg	1	7	4	pace	85.805	138.09	38.3583	0	469.26	41.9424
1	group stage	SouthAfrica	WestIndies	8_wickets	Johannesburg	1	7	5	pace	85.064	136.897	38.027	0	473.348	37.8546
1	group stage	SouthAfrica	WestIndies	8_wickets	Johannesburg	1	7	6	pace	87.441	140.723	39.0896	0	460.48	50.7221
1	group stage	SouthAfrica	WestIndies	8_wickets	Johannesburg	1	8	1	pace	86.02	138.436	38.4544	0	468.087	43.1152
1	group stage	SouthAfrica	WestIndies	8_wickets	Johannesburg	1	8	2	pace	91.414	147.117	40.8657	0	440.467	70.7353
1	group stage	SouthAfrica	WestIndies	8_wickets	Johannesburg	1	8	3	pace	88.643	142.657	39.627	0	454.236	56.9662
1	group stage	SouthAfrica	WestIndies	8_wickets	Johannesburg	1	8	4	pace	87.248	140.412	39.0033	0	461.499	49.7035
1	group stage	SouthAfrica	WestIndies	8_wickets	Johannesburg	1	8	5	pace	89.139	143.455	39.8487	0	451.709	59.4937
1	group stage	SouthAfrica	WestIndies	8_wickets	Johannesburg	1	8	6	pace	89.652	144.281	40.078	0	449.124	62.0785
1	group stage	SouthAfrica	WestIndies	8_wickets	Johannesburg	1	8	7	pace	88.12	141.815	39.3932	0	456.932	54.2703
1	group stage	SouthAfrica	WestIndies	8_wickets	Johannesburg	1	9	1	pace	66.061	106.315	29.5319	0	609.51	98.3078
1	group stage	SouthAfrica	WestIndies	8_wickets	Johannesburg	1	9	2	pace	66.504	107.028	29.7299	0	605.45	94.2477
1	group stage	SouthAfrica	WestIndies	8_wickets	Johannesburg	1	9	3	pace	78.765	126.76	35.2111	0	511.202	0
1	group stage	SouthAfrica	WestIndies	8_wickets	Johannesburg	1	9	4	pace	79.319	127.652	35.4588	0	507.632	3.57047
1	group stage	SouthAfrica	WestIndies	8_wickets	Johannesburg	1	9	5	pace	67.577	108.755	30.2096	0	595.837	84.6343
1	group stage	SouthAfrica	WestIndies	8_wickets	Johannesburg	1	9	6	pace	78.451	126.255	35.0707	0	513.248	2.04609
1	group stage	SouthAfrica	WestIndies	8_wickets	Johannesburg	1	9	7	pace	83.101	133.738	37.1495	0	484.529	26.6732
1	group stage	SouthAfrica	WestIndies	8_wickets	Johannesburg	1	10	1	pace	80.045	128.82	35.7833	0	503.028	8.17464
1	group stage	SouthAfrica	WestIndies	8_wickets	Johannesburg	1	10	2	pace	83.34	134.123	37.2563	0	483.14	28.0628
1	group stage	SouthAfrica	WestIndies	8_wickets	Johannesburg	1	10	3	pace	81.091	130.503	36.2509	0	496.539	14.6632
1	group stage	SouthAfrica	WestIndies	8_wickets	Johannesburg	1	10	4	pace	80.049	128.826	35.7851	0	503.003	8.19978
1	group stage	SouthAfrica	WestIndies	8_wickets	Johannesburg	1	10	5	pace	80.89	130.18	36.1611	0	497.773	13.4294
1	group stage	SouthAfrica	WestIndies	8_wickets	Johannesburg	1	10	6	pace	79.534	127.998	35.5549	0	506.26	4.94272
1	group stage	SouthAfrica	WestIndies	8_wickets	Johannesburg	1	10	7	pace	81.855	131.733	36.5925	0	491.905	19.2977
1	group stage	SouthAfrica	WestIndies	8_wickets	Johannesburg	1	10	8	pace	81.558	131.255	36.4597	0	493.696	17.5064
1	group stage	SouthAfrica	WestIndies	8_wickets	Johannesburg	1	11	1	pace	79.23	127.508	35.419	0	508.202	3.00024
1	group stage	SouthAfrica	WestIndies	8_wickets	Johannesburg	1	11	2	pace	79.854	128.513	35.6979	0	504.231	6.97146
1	group stage	SouthAfrica	WestIndies	8_wickets	Johannesburg	1	11	3	pace	81.688	131.464	36.5178	0	492.91	18.2921
1	group stage	SouthAfrica	WestIndies	8_wickets	Johannesburg	1	11	4	pace	67.244	108.219	30.0608	0	598.787	87.5849
1	group stage	SouthAfrica	WestIndies	8_wickets	Johannesburg	1	11	5	pace	84.598	136.147	37.8187	0	475.955	35.2472
1	group stage	SouthAfrica	WestIndies	8_wickets	Johannesburg	1	11	6	pace	78.812	126.836	35.2321	0	510.897	0.304859
1	group stage	SouthAfrica	WestIndies	8_wickets	Johannesburg	1	12	1	spin	52.953	85.2196	23.6721	0	760.389	249.186
1	group stage	SouthAfrica	WestIndies	8_wickets	Johannesburg	1	12	2	spin	58.138	93.564	25.99	0	692.574	181.371
1	group stage	SouthAfrica	WestIndies	8_wickets	Johannesburg	1	12	3	spin	54.345	87.4598	24.2944	0	740.912	229.709
1	group stage	SouthAfrica	WestIndies	8_wickets	Johannesburg	1	12	4	spin	57.858	93.1134	25.8648	0	695.925	184.723
1	group stage	SouthAfrica	WestIndies	8_wickets	Johannesburg	1	12	5	spin	57.899	93.1794	25.8832	0	695.433	184.23
1	group stage	SouthAfrica	WestIndies	8_wickets	Johannesburg	1	12	6	spin	56.958	91.665	25.4625	0	706.922	195.719
1	group stage	SouthAfrica	WestIndies	8_wickets	Johannesburg	1	13	1	pace	78.258	125.944	34.9845	0	514.514	3.31186
1	group stage	SouthAfrica	WestIndies	8_wickets	Johannesburg	1	13	2	pace	54.906	88.3626	24.5452	0	733.342	222.139
1	group stage	SouthAfrica	WestIndies	8_wickets	Johannesburg	1	13	3	pace	79.786	128.403	35.6675	0	504.661	6.54172
1	group stage	SouthAfrica	WestIndies	8_wickets	Johannesburg	1	13	4	pace	78.159	125.785	34.9402	0	515.166	3.96357
1	group stage	SouthAfrica	WestIndies	8_wickets	Johannesburg	1	13	5	pace	78.357	126.103	35.0287	0	513.864	2.6618
1	group stage	SouthAfrica	WestIndies	8_wickets	Johannesburg	1	13	6	pace	77.971	125.482	34.8562	0	516.408	5.20571
1	group stage	SouthAfrica	WestIndies	8_wickets	Johannesburg	1	14	1	pace	79.872	128.542	35.706	0	504.117	7.0851
1	group stage	SouthAfrica	WestIndies	8_wickets	Johannesburg	1	14	2	pace	66.528	107.066	29.7407	0	605.232	94.0293
1	group stage	SouthAfrica	WestIndies	8_wickets	Johannesburg	1	14	3	pace	80.828	130.08	36.1333	0	498.155	13.0476
1	group stage	SouthAfrica	WestIndies	8_wickets	Johannesburg	1	14	4	pace	83.997	135.18	37.55	0	479.361	31.8417
1	group stage	SouthAfrica	WestIndies	8_wickets	Johannesburg	1	14	5	pace	81.671	131.437	36.5102	0	493.013	18.1895
1	group stage	SouthAfrica	WestIndies	8_wickets	Johannesburg	1	14	6	pace	79.574	128.062	35.5728	0	506.005	5.19721
1	group stage	SouthAfrica	WestIndies	8_wickets	Johannesburg	1	15	1	pace	80.594	129.703	36.0287	0	499.601	11.6012
1	group stage	SouthAfrica	WestIndies	8_wickets	Johannesburg	1	15	2	pace	79.326	127.663	35.4619	0	507.587	3.61527
1	group stage	SouthAfrica	WestIndies	8_wickets	Johannesburg	1	15	3	pace	80.953	130.281	36.1892	0	497.386	13.8168
1	group stage	SouthAfrica	WestIndies	8_wickets	Johannesburg	1	15	4	pace	79.207	127.471	35.4087	0	508.35	2.85267
1	group stage	SouthAfrica	WestIndies	8_wickets	Johannesburg	1	15	5	pace	80.213	129.09	35.8584	0	501.974	9.22819
1	group stage	SouthAfrica	WestIndies	8_wickets	Johannesburg	1	15	6	pace	80.1	128.908	35.8079	0	502.682	8.52004
1	group stage	SouthAfrica	WestIndies	8_wickets	Johannesburg	1	15	7	pace	78.774	126.774	35.2151	0	511.144	0.0584053
1	group stage	SouthAfrica	WestIndies	8_wickets	Johannesburg	1	15	8	pace	80.925	130.236	36.1767	0	497.558	13.6447
1	group stage	SouthAfrica	WestIndies	8_wickets	Johannesburg	1	15	9	pace	77.634	124.94	34.7055	0	518.65	7.44738
1	group stage	SouthAfrica	WestIndies	8_wickets	Johannesburg	1	16	1	pace	87.61	140.995	39.1652	0	459.592	51.6104
1	group stage	SouthAfrica	WestIndies	8_wickets	Johannesburg	1	16	2	pace	88.024	141.661	39.3502	0	457.43	53.772
1	group stage	SouthAfrica	WestIndies	8_wickets	Johannesburg	1	16	3	pace	85.681	137.89	38.3028	0	469.939	41.2632
1	group stage	SouthAfrica	WestIndies	8_wickets	Johannesburg	1	16	4	pace	88.683	142.721	39.6448	0	454.031	57.1711
1	group stage	SouthAfrica	WestIndies	8_wickets	Johannesburg	1	16	5	pace	88.827	142.953	39.7092	0	453.295	57.9071
1	group stage	SouthAfrica	WestIndies	8_wickets	Johannesburg	1	16	6	pace	85.687	137.9	38.3055	0	469.906	41.2961
1	group stage	SouthAfrica	WestIndies	8_wickets	Johannesburg	1	16	7	pace	86.28	138.854	38.5706	0	466.677	44.5258
1	group stage	SouthAfrica	WestIndies	8_wickets	Johannesburg	1	17	1	pace	83.183	133.87	37.1861	0	484.051	27.1509
1	group stage	SouthAfrica	WestIndies	8_wickets	Johannesburg	1	17	2	pace	74.985	120.677	33.5213	0	536.972	25.7698
1	group stage	SouthAfrica	WestIndies	8_wickets	Johannesburg	1	17	3	pace	86.232	138.777	38.5492	0	466.936	44.266
1	group stage	SouthAfrica	WestIndies	8_wickets	Johannesburg	1	17	4	pace	81.607	131.334	36.4816	0	493.4	17.8028
1	group stage	SouthAfrica	WestIndies	8_wickets	Johannesburg	1	17	5	pace	73.817	118.797	32.9992	0	545.469	34.2662
1	group stage	SouthAfrica	WestIndies	8_wickets	Johannesburg	1	17	6	pace	79.664	128.207	35.613	0	505.433	5.76887
1	group stage	SouthAfrica	WestIndies	8_wickets	Johannesburg	1	18	1	pace	86.416	139.073	38.6314	0	465.942	45.2602
1	group stage	SouthAfrica	WestIndies	8_wickets	Johannesburg	1	18	2	pace	85.086	136.933	38.0368	0	473.225	37.977
1	group stage	SouthAfrica	WestIndies	8_wickets	Johannesburg	1	18	3	pace	81.959	131.9	36.639	0	491.28	19.9219
1	group stage	SouthAfrica	WestIndies	8_wickets	Johannesburg	1	18	4	pace	86.738	139.591	38.7754	0	464.212	46.99
1	group stage	SouthAfrica	WestIndies	8_wickets	Johannesburg	1	18	5	pace	84.695	136.303	37.8621	0	475.41	35.7923
1	group stage	SouthAfrica	WestIndies	8_wickets	Johannesburg	1	18	6	pace	88.086	141.761	39.378	0	457.108	54.0939
1	group stage	SouthAfrica	WestIndies	8_wickets	Johannesburg	1	19	1	pace	83.09	133.72	37.1446	0	484.593	26.6091
1	group stage	SouthAfrica	WestIndies	8_wickets	Johannesburg	1	19	2	pace	78.592	126.482	35.1338	0	512.328	1.12528
1	group stage	SouthAfrica	WestIndies	8_wickets	Johannesburg	1	19	3	pace	83.847	134.939	37.483	0	480.218	30.9842
1	group stage	SouthAfrica	WestIndies	8_wickets	Johannesburg	1	19	4	pace	85.727	137.964	38.3234	0	469.687	41.5154
1	group stage	SouthAfrica	WestIndies	8_wickets	Johannesburg	1	19	5	pace	84.841	136.538	37.9273	0	474.592	36.6104
1	group stage	SouthAfrica	WestIndies	8_wickets	Johannesburg	1	19	6	pace	84.414	135.851	37.7364	0	476.993	34.2098
1	group stage	SouthAfrica	WestIndies	8_wickets	Johannesburg	1	20	1	pace	76.959	123.854	34.4038	0	523.199	11.9964
1	group stage	SouthAfrica	WestIndies	8_wickets	Johannesburg	1	20	2	pace	78.828	126.861	35.2393	0	510.794	0.408557
1	group stage	SouthAfrica	WestIndies	8_wickets	Johannesburg	1	20	3	pace	78.003	125.534	34.8705	0	516.196	4.99386
1	group stage	SouthAfrica	WestIndies	8_wickets	Johannesburg	1	20	4	pace	77.385	124.539	34.5942	0	520.319	9.11623
1	group stage	SouthAfrica	WestIndies	8_wickets	Johannesburg	1	20	5	pace	78.793	126.805	35.2236	0	511.021	0.181662
1	group stage	SouthAfrica	WestIndies	8_wickets	Johannesburg	1	20	6	pace	78.63	126.543	35.1508	0	512.08	0.877684
1	group stage	SouthAfrica	WestIndies	8_wickets	Johannesburg	2	1	1	pace	86.032	138.455	38.4597	0	468.022	43.1805
1	group stage	SouthAfrica	WestIndies	8_wickets	Johannesburg	2	1	2	pace	85.185	137.092	38.0811	0	472.675	38.527
1	group stage	SouthAfrica	WestIndies	8_wickets	Johannesburg	2	1	3	pace	86.521	139.242	38.6783	0	465.377	45.8257
1	group stage	SouthAfrica	WestIndies	8_wickets	Johannesburg	2	1	4	pace	88.279	142.071	39.4642	0	456.109	55.0933
1	group stage	SouthAfrica	WestIndies	8_wickets	Johannesburg	2	1	5	pace	86.551	139.29	38.6918	0	465.215	45.987
1	group stage	SouthAfrica	WestIndies	8_wickets	Johannesburg	2	1	6	pace	85.161	137.053	38.0704	0	472.809	38.3938
1	group stage	SouthAfrica	WestIndies	8_wickets	Johannesburg	2	2	1	pace	81.5	131.162	36.4338	0	494.047	17.1551
1	group stage	SouthAfrica	WestIndies	8_wickets	Johannesburg	2	2	2	pace	76.055	122.399	33.9996	0	529.418	18.2152
1	group stage	SouthAfrica	WestIndies	8_wickets	Johannesburg	2	2	3	pace	80.98	130.325	36.2013	0	497.22	13.9826
1	group stage	SouthAfrica	WestIndies	8_wickets	Johannesburg	2	2	4	pace	81.891	131.791	36.6086	0	491.688	19.514
1	group stage	SouthAfrica	WestIndies	8_wickets	Johannesburg	2	2	5	pace	81.278	130.804	36.3345	0	495.397	15.8056
1	group stage	SouthAfrica	WestIndies	8_wickets	Johannesburg	2	2	6	pace	80.257	129.161	35.8781	0	501.699	9.50339
1	group stage	SouthAfrica	WestIndies	8_wickets	Johannesburg	2	3	1	pace	88.34	142.169	39.4915	0	455.794	55.4082
1	group stage	SouthAfrica	WestIndies	8_wickets	Johannesburg	2	3	2	pace	87.528	140.863	39.1285	0	460.023	51.1798
1	group stage	SouthAfrica	WestIndies	8_wickets	Johannesburg	2	3	3	pace	87.575	140.938	39.1495	0	459.776	51.4267
1	group stage	SouthAfrica	WestIndies	8_wickets	Johannesburg	2	3	4	pace	86.663	139.471	38.7418	0	464.614	46.5882
1	group stage	SouthAfrica	WestIndies	8_wickets	Johannesburg	2	3	5	pace	87.552	140.901	39.1392	0	459.896	51.3059
1	group stage	SouthAfrica	WestIndies	8_wickets	Johannesburg	2	3	6	pace	86.722	139.566	38.7682	0	464.298	46.9043
1	group stage	SouthAfrica	WestIndies	8_wickets	Johannesburg	2	3	7	pace	71.314	114.769	31.8802	0	564.614	53.4112
1	group stage	SouthAfrica	WestIndies	8_wickets	Johannesburg	2	4	1	pace	82.101	132.129	36.7024	0	490.431	20.7716
1	group stage	SouthAfrica	WestIndies	8_wickets	Johannesburg	2	4	2	pace	84.856	136.562	37.934	0	474.508	36.6943
1	group stage	SouthAfrica	WestIndies	8_wickets	Johannesburg	2	4	3	pace	85.075	136.915	38.0319	0	473.287	37.9158
1	group stage	SouthAfrica	WestIndies	8_wickets	Johannesburg	2	4	4	pace	81.895	131.797	36.6103	0	491.664	19.538
1	group stage	SouthAfrica	WestIndies	8_wickets	Johannesburg	2	4	5	pace	73.018	117.511	32.642	0	551.437	40.235
1	group stage	SouthAfrica	WestIndies	8_wickets	Johannesburg	2	4	6	pace	85.104	136.962	38.0449	0	473.125	38.0771
1	group stage	SouthAfrica	WestIndies	8_wickets	Johannesburg	2	4	7	pace	68.57	110.353	30.6535	0	587.208	76.0057
1	group stage	SouthAfrica	WestIndies	8_wickets	Johannesburg	2	5	1	pace	87.244	140.406	39.0016	0	461.52	49.6823
1	group stage	SouthAfrica	WestIndies	8_wickets	Johannesburg	2	5	2	pace	87.58	140.946	39.1518	0	459.749	51.4529
1	group stage	SouthAfrica	WestIndies	8_wickets	Johannesburg	2	5	3	pace	86.952	139.936	38.871	0	463.07	48.1325
1	group stage	SouthAfrica	WestIndies	8_wickets	Johannesburg	2	5	4	pace	84.454	135.916	37.7543	0	476.767	34.4357
1	group stage	SouthAfrica	WestIndies	8_wickets	Johannesburg	2	5	5	pace	84.771	136.426	37.896	0	474.984	36.2185
1	group stage	SouthAfrica	WestIndies	8_wickets	Johannesburg	2	5	6	pace	86.152	138.648	38.5134	0	467.37	43.8324
1	group stage	SouthAfrica	WestIndies	8_wickets	Johannesburg	2	5	7	pace	85.966	138.349	38.4302	0	468.381	42.8212
1	group stage	SouthAfrica	WestIndies	8_wickets	Johannesburg	2	5	8	pace	84.646	136.225	37.8401	0	475.685	35.5171
1	group stage	SouthAfrica	WestIndies	8_wickets	Johannesburg	2	5	9	pace	85.607	137.771	38.2698	0	470.345	40.857
1	group stage	SouthAfrica	WestIndies	8_wickets	Johannesburg	2	6	1	pace	78.816	126.842	35.2339	0	510.872	0.330787
1	group stage	SouthAfrica	WestIndies	8_wickets	Johannesburg	2	6	2	pace	79.052	127.222	35.3394	0	509.346	1.85593
1	group stage	SouthAfrica	WestIndies	8_wickets	Johannesburg	2	6	3	pace	82.19	132.272	36.7422	0	489.9	21.3027
1	group stage	SouthAfrica	WestIndies	8_wickets	Johannesburg	2	6	4	pace	78.948	127.054	35.2929	0	510.017	1.18496
1	group stage	SouthAfrica	WestIndies	8_wickets	Johannesburg	2	6	5	pace	80.044	128.818	35.7829	0	503.034	8.16836
1	group stage	SouthAfrica	WestIndies	8_wickets	Johannesburg	2	6	6	pace	82.12	132.159	36.7109	0	490.317	20.8851
1	group stage	SouthAfrica	WestIndies	8_wickets	Johannesburg	2	6	7	pace	83.116	133.762	37.1562	0	484.442	26.7607
1	group stage	SouthAfrica	WestIndies	8_wickets	Johannesburg	2	7	1	pace	85.971	138.357	38.4325	0	468.354	42.8485
1	group stage	SouthAfrica	WestIndies	8_wickets	Johannesburg	2	7	2	pace	84.663	136.252	37.8477	0	475.59	35.6126
1	group stage	SouthAfrica	WestIndies	8_wickets	Johannesburg	2	7	3	pace	85.032	136.846	38.0127	0	473.526	37.6765
1	group stage	SouthAfrica	WestIndies	8_wickets	Johannesburg	2	7	4	pace	83.997	135.18	37.55	0	479.361	31.8417
1	group stage	SouthAfrica	WestIndies	8_wickets	Johannesburg	2	7	5	pace	86.029	138.45	38.4584	0	468.038	43.1642
1	group stage	SouthAfrica	WestIndies	8_wickets	Johannesburg	2	7	6	pace	84.963	136.735	37.9819	0	473.91	37.2919
1	group stage	SouthAfrica	WestIndies	8_wickets	Johannesburg	2	8	1	pace	76.188	122.613	34.0591	0	528.493	17.291
1	group stage	SouthAfrica	WestIndies	8_wickets	Johannesburg	2	8	2	pace	81.67	131.435	36.5098	0	493.019	18.1835
1	group stage	SouthAfrica	WestIndies	8_wickets	Johannesburg	2	8	3	pace	66.849	107.583	29.8842	0	602.325	91.1231
1	group stage	SouthAfrica	WestIndies	8_wickets	Johannesburg	2	8	4	pace	78.854	126.903	35.2509	0	510.625	0.576978
1	group stage	SouthAfrica	WestIndies	8_wickets	Johannesburg	2	8	5	pace	75.437	121.404	33.7234	0	533.755	22.5523
1	group stage	SouthAfrica	WestIndies	8_wickets	Johannesburg	2	8	6	pace	78.675	126.615	35.1709	0	511.787	0.584788
1	group stage	SouthAfrica	WestIndies	8_wickets	Johannesburg	2	8	7	pace	75.898	122.146	33.9294	0	530.513	19.3104
1	group stage	SouthAfrica	WestIndies	8_wickets	Johannesburg	2	8	8	pace	77.223	124.278	34.5218	0	521.41	10.2078
1	group stage	SouthAfrica	WestIndies	8_wickets	Johannesburg	2	8	9	pace	78.95	127.058	35.2938	0	510.004	1.19788
1	group stage	SouthAfrica	WestIndies	8_wickets	Johannesburg	2	9	1	pace	88.045	141.695	39.3596	0	457.321	53.8811
1	group stage	SouthAfrica	WestIndies	8_wickets	Johannesburg	2	9	2	pace	88.187	141.923	39.4231	0	456.585	54.6174
1	group stage	SouthAfrica	WestIndies	8_wickets	Johannesburg	2	9	3	pace	90.61	145.823	40.5063	0	444.375	66.827
1	group stage	SouthAfrica	WestIndies	8_wickets	Johannesburg	2	9	4	pace	95.83	154.223	42.8398	0	420.17	91.0327
1	group stage	SouthAfrica	WestIndies	8_wickets	Johannesburg	2	9	5	pace	88.777	142.873	39.6869	0	453.551	57.6518
1	group stage	SouthAfrica	WestIndies	8_wickets	Johannesburg	2	9	6	pace	86.794	139.681	38.8004	0	463.913	47.2895
1	group stage	SouthAfrica	WestIndies	8_wickets	Johannesburg	2	9	7	pace	85.582	137.731	38.2586	0	470.483	40.7196
1	group stage	SouthAfrica	WestIndies	8_wickets	Johannesburg	2	9	8	pace	87.44	140.721	39.0892	0	460.486	50.7168
1	group stage	SouthAfrica	WestIndies	8_wickets	Johannesburg	2	10	1	pace	80.123	128.945	35.8182	0	502.538	8.66434
1	group stage	SouthAfrica	WestIndies	8_wickets	Johannesburg	2	10	2	pace	75.387	121.324	33.701	0	534.109	22.9064
1	group stage	SouthAfrica	WestIndies	8_wickets	Johannesburg	2	10	3	pace	80.024	128.786	35.7739	0	503.16	8.04263
1	group stage	SouthAfrica	WestIndies	8_wickets	Johannesburg	2	10	4	pace	67.295	108.301	30.0836	0	598.334	87.1312
1	group stage	SouthAfrica	WestIndies	8_wickets	Johannesburg	2	10	5	pace	78.804	126.823	35.2285	0	510.949	0.252993
1	group stage	SouthAfrica	WestIndies	8_wickets	Johannesburg	2	10	6	pace	77.427	124.607	34.613	0	520.036	8.83398
1	group stage	SouthAfrica	WestIndies	8_wickets	Johannesburg	2	10	7	pace	76.207	122.643	34.0676	0	528.362	17.1593
1	group stage	SouthAfrica	WestIndies	8_wickets	Johannesburg	2	11	1	pace	87.032	140.064	38.9068	0	462.644	48.5581
1	group stage	SouthAfrica	WestIndies	8_wickets	Johannesburg	2	11	2	pace	89.144	143.463	39.8509	0	451.683	59.5191
1	group stage	SouthAfrica	WestIndies	8_wickets	Johannesburg	2	11	3	pace	88.909	143.085	39.7459	0	452.877	58.3252
1	group stage	SouthAfrica	WestIndies	8_wickets	Johannesburg	2	11	4	pace	88.316	142.131	39.4808	0	455.918	55.2844
1	group stage	SouthAfrica	WestIndies	8_wickets	Johannesburg	2	11	5	pace	87.594	140.969	39.158	0	459.676	51.5264
1	group stage	SouthAfrica	WestIndies	8_wickets	Johannesburg	2	11	6	pace	91.481	147.224	40.8957	0	440.144	71.0579
1	group stage	SouthAfrica	WestIndies	8_wickets	Johannesburg	2	12	1	pace	79.961	128.685	35.7458	0	503.556	7.6462
1	group stage	SouthAfrica	WestIndies	8_wickets	Johannesburg	2	12	2	pace	61.07	98.2826	27.3007	0	659.323	148.121
1	group stage	SouthAfrica	WestIndies	8_wickets	Johannesburg	2	12	3	pace	65.195	104.921	29.1448	0	617.606	106.404
1	group stage	SouthAfrica	WestIndies	8_wickets	Johannesburg	2	12	4	pace	64.876	104.408	29.0022	0	620.643	109.441
1	group stage	SouthAfrica	WestIndies	8_wickets	Johannesburg	2	12	5	pace	59.052	95.035	26.3986	0	681.854	170.652
1	group stage	SouthAfrica	WestIndies	8_wickets	Johannesburg	2	12	6	pace	81.866	131.751	36.5974	0	491.839	19.3638
1	group stage	SouthAfrica	WestIndies	8_wickets	Johannesburg	2	13	1	pace	77.68	125.014	34.7261	0	518.343	7.14025
1	group stage	SouthAfrica	WestIndies	8_wickets	Johannesburg	2	13	2	pace	77.135	124.137	34.4824	0	522.005	10.8026
1	group stage	SouthAfrica	WestIndies	8_wickets	Johannesburg	2	13	3	pace	76.975	123.879	34.4109	0	523.09	11.8877
1	group stage	SouthAfrica	WestIndies	8_wickets	Johannesburg	2	13	4	pace	64.805	104.294	28.9704	0	621.323	110.121
1	group stage	SouthAfrica	WestIndies	8_wickets	Johannesburg	2	13	5	pace	78.293	126	35.0001	0	514.284	3.08185
1	group stage	SouthAfrica	WestIndies	8_wickets	Johannesburg	2	13	6	pace	77.608	124.898	34.6939	0	518.823	7.62114
1	group stage	SouthAfrica	WestIndies	8_wickets	Johannesburg	2	13	7	pace	78.614	126.517	35.1436	0	512.184	0.981906
1	group stage	SouthAfrica	WestIndies	8_wickets	Johannesburg	2	13	8	pace	77.341	124.468	34.5745	0	520.615	9.41224
1	group stage	SouthAfrica	WestIndies	8_wickets	Johannesburg	2	14	1	spin	73.168	117.752	32.709	0	550.307	39.1045
1	group stage	SouthAfrica	WestIndies	8_wickets	Johannesburg	2	14	2	spin	71.516	115.094	31.9705	0	563.019	51.8165
1	group stage	SouthAfrica	WestIndies	8_wickets	Johannesburg	2	14	3	spin	59.85	96.3192	26.7553	0	672.763	161.56
1	group stage	SouthAfrica	WestIndies	8_wickets	Johannesburg	2	14	4	spin	71.022	114.299	31.7497	0	566.935	55.7326
1	group stage	SouthAfrica	WestIndies	8_wickets	Johannesburg	2	14	5	spin	75.044	120.772	33.5477	0	536.55	25.3476
1	group stage	SouthAfrica	WestIndies	8_wickets	Johannesburg	2	14	6	spin	72.597	116.834	32.4538	0	554.635	43.4329
1	group stage	SouthAfrica	WestIndies	8_wickets	Johannesburg	2	15	1	pace	77.411	124.581	34.6058	0	520.144	8.94147
1	group stage	SouthAfrica	WestIndies	8_wickets	Johannesburg	2	15	2	pace	80.503	129.557	35.9881	0	500.166	11.0365
1	group stage	SouthAfrica	WestIndies	8_wickets	Johannesburg	2	15	3	pace	80.16	129.005	35.8347	0	502.306	8.8963
1	group stage	SouthAfrica	WestIndies	8_wickets	Johannesburg	2	15	4	pace	80.502	129.555	35.9876	0	500.172	11.0303
1	group stage	SouthAfrica	WestIndies	8_wickets	Johannesburg	2	15	5	pace	78.698	126.652	35.1812	0	511.638	0.435215
1	group stage	SouthAfrica	WestIndies	8_wickets	Johannesburg	2	15	6	pace	81.568	131.271	36.4642	0	493.635	17.5669
1	group stage	SouthAfrica	WestIndies	8_wickets	Johannesburg	2	16	1	spin	73.278	117.93	32.7582	0	549.481	38.2784
1	group stage	SouthAfrica	WestIndies	8_wickets	Johannesburg	2	16	2	spin	74.456	119.825	33.2848	0	540.787	29.5849
1	group stage	SouthAfrica	WestIndies	8_wickets	Johannesburg	2	16	3	spin	73.717	118.636	32.9544	0	546.209	35.0062
1	group stage	SouthAfrica	WestIndies	8_wickets	Johannesburg	2	16	4	spin	70.902	114.106	31.696	0	567.894	56.6921
1	group stage	SouthAfrica	WestIndies	8_wickets	Johannesburg	2	16	5	spin	73.237	117.864	32.7399	0	549.788	38.5861
1	group stage	SouthAfrica	WestIndies	8_wickets	Johannesburg	2	16	6	spin	71.162	114.524	31.8123	0	565.82	54.6172
1	group stage	SouthAfrica	WestIndies	8_wickets	Johannesburg	2	17	1	pace	87.725	141.18	39.2166	0	458.989	52.2129
1	group stage	SouthAfrica	WestIndies	8_wickets	Johannesburg	2	17	2	pace	86.031	138.453	38.4593	0	468.027	43.1751
1	group stage	SouthAfrica	WestIndies	8_wickets	Johannesburg	2	17	3	pace	86.726	139.572	38.77	0	464.277	46.9257
1	group stage	SouthAfrica	WestIndies	8_wickets	Johannesburg	2	17	4	pace	84.626	136.192	37.8312	0	475.798	35.4047
1	group stage	SouthAfrica	WestIndies	8_wickets	Johannesburg	2	17	5	pace	87.22	140.367	38.9908	0	461.647	49.5553
1	group stage	SouthAfrica	WestIndies	8_wickets	Johannesburg	2	17	6	pace	87.648	141.056	39.1822	0	459.393	51.8096
1	group stage	SouthAfrica	WestIndies	8_wickets	Johannesburg	2	17	7	pace	86.609	139.384	38.7177	0	464.904	46.2986
1	group stage	SouthAfrica	WestIndies	8_wickets	Johannesburg	2	17	8	pace	85.441	137.504	38.1955	0	471.259	39.9432
1	group stage	SouthAfrica	WestIndies	8_wickets	Johannesburg	2	18	1	pace	79.099	127.298	35.3604	0	509.044	2.15858
1	group stage	SouthAfrica	WestIndies	8_wickets	Johannesburg	2	18	2	pace	62.518	100.613	27.948	0	644.052	132.85
1	group stage	SouthAfrica	WestIndies	8_wickets	Johannesburg	2	18	3	pace	10.789	17.3632	4.82311	1	3732.03	3220.83
1	group stage	SouthAfrica	WestIndies	8_wickets	Johannesburg	2	18	4	pace	76.946	123.833	34.3979	0	523.287	12.0848
1	group stage	SouthAfrica	WestIndies	8_wickets	Johannesburg	2	18	5	pace	76.764	123.54	34.3166	0	524.528	13.3255
2	group stage	NewZeeland	Kenya	9_wickets	Durban	1	1	1	pace	80.808	130.048	36.1244	0	498.278	12.9243
2	group stage	NewZeeland	Kenya	9_wickets	Durban	1	1	2	pace	82.776	133.215	37.0042	0	486.431	24.7709
2	group stage	NewZeeland	Kenya	9_wickets	Durban	1	1	3	pace	85.158	137.049	38.069	0	472.825	38.3771
2	group stage	NewZeeland	Kenya	9_wickets	Durban	1	1	4	pace	83.652	134.625	37.3958	0	481.338	29.8647
2	group stage	NewZeeland	Kenya	9_wickets	Durban	1	1	5	pace	84.062	135.285	37.5791	0	478.99	32.2124
2	group stage	NewZeeland	Kenya	9_wickets	Durban	1	1	6	pace	82.443	132.679	36.8553	0	488.396	22.8061
2	group stage	NewZeeland	Kenya	9_wickets	Durban	1	2	1	pace	81.033	130.41	36.225	0	496.895	14.3078
2	group stage	NewZeeland	Kenya	9_wickets	Durban	1	2	2	pace	80.56	129.649	36.0135	0	499.812	11.3904
2	group stage	NewZeeland	Kenya	9_wickets	Durban	1	2	3	pace	84.597	136.146	37.8182	0	475.961	35.2416
2	group stage	NewZeeland	Kenya	9_wickets	Durban	1	2	4	pace	80.007	128.759	35.7663	0	503.267	7.93572
2	group stage	NewZeeland	Kenya	9_wickets	Durban	1	2	5	pace	81.778	131.609	36.558	0	492.368	18.8346
2	group stage	NewZeeland	Kenya	9_wickets	Durban	1	2	6	pace	83.666	134.647	37.402	0	481.257	29.9453
2	group stage	NewZeeland	Kenya	9_wickets	Durban	1	3	1	pace	84.841	136.538	37.9273	0	474.592	36.6104
2	group stage	NewZeeland	Kenya	9_wickets	Durban	1	3	2	pace	84.595	136.142	37.8173	0	475.972	35.2303
2	group stage	NewZeeland	Kenya	9_wickets	Durban	1	3	3	pace	85.611	137.778	38.2715	0	470.323	40.879
2	group stage	NewZeeland	Kenya	9_wickets	Durban	1	3	4	pace	85.208	137.129	38.0914	0	472.548	38.6545
2	group stage	NewZeeland	Kenya	9_wickets	Durban	1	3	5	pace	85.516	137.625	38.2291	0	470.846	40.3565
2	group stage	NewZeeland	Kenya	9_wickets	Durban	1	3	6	pace	83.509	134.395	37.3319	0	482.162	29.0405
2	group stage	NewZeeland	Kenya	9_wickets	Durban	1	4	1	pace	86.171	138.679	38.5219	0	467.267	43.9355
2	group stage	NewZeeland	Kenya	9_wickets	Durban	1	4	3	pace	83.431	134.269	37.297	0	482.613	28.5897
2	group stage	NewZeeland	Kenya	9_wickets	Durban	1	4	4	pace	81.613	131.343	36.4843	0	493.363	17.8391
2	group stage	NewZeeland	Kenya	9_wickets	Durban	1	4	5	pace	82.116	132.153	36.7091	0	490.341	20.8612
2	group stage	NewZeeland	Kenya	9_wickets	Durban	1	4	6	pace	83.322	134.094	37.2483	0	483.244	27.9584
2	group stage	NewZeeland	Kenya	9_wickets	Durban	1	4	7	pace	84.621	136.184	37.829	0	475.826	35.3766
2	group stage	NewZeeland	Kenya	9_wickets	Durban	1	5	1	pace	86.225	138.766	38.546	0	466.974	44.2281
2	group stage	NewZeeland	Kenya	9_wickets	Durban	1	5	2	pace	84.196	135.5	37.639	0	478.228	32.9747
2	group stage	NewZeeland	Kenya	9_wickets	Durban	1	5	3	pace	85.747	137.996	38.3323	0	469.577	41.625
2	group stage	NewZeeland	Kenya	9_wickets	Durban	1	5	4	pace	70.56	113.555	31.5431	0	570.647	59.4447
2	group stage	NewZeeland	Kenya	9_wickets	Durban	1	5	5	pace	86.013	138.425	38.4513	0	468.125	43.0771
2	group stage	NewZeeland	Kenya	9_wickets	Durban	1	5	6	pace	85.573	137.716	38.2546	0	470.532	40.6701
2	group stage	NewZeeland	Kenya	9_wickets	Durban	1	5	7	pace	83.522	134.416	37.3377	0	482.087	29.1156
2	group stage	NewZeeland	Kenya	9_wickets	Durban	1	6	1	pace	76.564	123.218	34.2272	0	525.898	14.6956
2	group stage	NewZeeland	Kenya	9_wickets	Durban	1	6	2	pace	78.46	126.269	35.0748	0	513.19	1.98721
2	group stage	NewZeeland	Kenya	9_wickets	Durban	1	6	3	pace	78.391	126.158	35.0439	0	513.641	2.43892
2	group stage	NewZeeland	Kenya	9_wickets	Durban	1	6	4	pace	78.335	126.068	35.0189	0	514.008	2.80611
2	group stage	NewZeeland	Kenya	9_wickets	Durban	1	6	5	pace	78.478	126.298	35.0828	0	513.072	1.86951
2	group stage	NewZeeland	Kenya	9_wickets	Durban	1	6	6	pace	78.749	126.734	35.204	0	511.306	0.103865
2	group stage	NewZeeland	Kenya	9_wickets	Durban	1	6	7	pace	78.415	126.197	35.0546	0	513.484	2.28172
2	group stage	NewZeeland	Kenya	9_wickets	Durban	1	7	1	pace	86.018	138.433	38.4535	0	468.098	43.1044
2	group stage	NewZeeland	Kenya	9_wickets	Durban	1	7	2	pace	86.748	139.607	38.7798	0	464.159	47.0435
2	group stage	NewZeeland	Kenya	9_wickets	Durban	1	7	3	pace	86.417	139.075	38.6319	0	465.937	45.2656
2	group stage	NewZeeland	Kenya	9_wickets	Durban	1	7	4	pace	75.163	120.963	33.6009	0	535.7	24.4981
2	group stage	NewZeeland	Kenya	9_wickets	Durban	1	7	5	pace	86.512	139.228	38.6743	0	465.425	45.7773
2	group stage	NewZeeland	Kenya	9_wickets	Durban	1	7	6	pace	87.91	141.477	39.2993	0	458.024	53.1788
2	group stage	NewZeeland	Kenya	9_wickets	Durban	1	8	1	pace	76.252	122.716	34.0877	0	528.05	16.8474
2	group stage	NewZeeland	Kenya	9_wickets	Durban	1	8	2	pace	77.647	124.961	34.7113	0	518.563	7.36054
2	group stage	NewZeeland	Kenya	9_wickets	Durban	1	8	3	pace	80.394	129.382	35.9393	0	500.844	10.3583
2	group stage	NewZeeland	Kenya	9_wickets	Durban	1	8	4	pace	64.061	103.096	28.6378	0	628.539	117.337
2	group stage	NewZeeland	Kenya	9_wickets	Durban	1	8	5	pace	79.159	127.394	35.3872	0	508.658	2.54442
2	group stage	NewZeeland	Kenya	9_wickets	Durban	1	9	1	pace	81.494	131.152	36.4311	0	494.084	17.1187
2	group stage	NewZeeland	Kenya	9_wickets	Durban	1	9	2	pace	82.728	133.138	36.9827	0	486.714	24.4886
2	group stage	NewZeeland	Kenya	9_wickets	Durban	1	9	3	pace	84.331	135.718	37.6993	0	477.462	33.7403
2	group stage	NewZeeland	Kenya	9_wickets	Durban	1	9	4	pace	84.414	135.851	37.7364	0	476.993	34.2098
2	group stage	NewZeeland	Kenya	9_wickets	Durban	1	9	5	pace	82.379	132.576	36.8267	0	488.776	22.4267
2	group stage	NewZeeland	Kenya	9_wickets	Durban	1	9	6	pace	83.037	133.635	37.1209	0	484.903	26.2998
2	group stage	NewZeeland	Kenya	9_wickets	Durban	1	10	1	spin	51.462	82.8201	23.0056	0	782.419	271.217
2	group stage	NewZeeland	Kenya	9_wickets	Durban	1	10	2	spin	55.526	89.3604	24.8223	0	725.153	213.951
2	group stage	NewZeeland	Kenya	9_wickets	Durban	1	10	3	spin	51.734	83.2578	23.1272	0	778.305	267.103
2	group stage	NewZeeland	Kenya	9_wickets	Durban	1	10	4	spin	56.667	91.1967	25.3324	0	710.552	199.35
2	group stage	NewZeeland	Kenya	9_wickets	Durban	1	10	5	spin	46.591	74.9809	20.828	0	864.22	353.017
2	group stage	NewZeeland	Kenya	9_wickets	Durban	1	10	6	spin	55.973	90.0798	25.0222	0	719.362	208.16
2	group stage	NewZeeland	Kenya	9_wickets	Durban	1	11	1	pace	71.344	114.817	31.8936	0	564.376	53.1738
2	group stage	NewZeeland	Kenya	9_wickets	Durban	1	11	2	pace	83.226	133.939	37.2054	0	483.801	27.401
2	group stage	NewZeeland	Kenya	9_wickets	Durban	1	11	3	pace	85.635	137.816	38.2823	0	470.192	41.0108
2	group stage	NewZeeland	Kenya	9_wickets	Durban	1	11	4	pace	84.652	136.234	37.8428	0	475.652	35.5508
2	group stage	NewZeeland	Kenya	9_wickets	Durban	1	11	5	pace	87.406	140.666	39.074	0	460.665	50.5377
2	group stage	NewZeeland	Kenya	9_wickets	Durban	1	11	6	pace	83.96	135.121	37.5335	0	479.572	31.6305
2	group stage	NewZeeland	Kenya	9_wickets	Durban	1	12	1	spin	54.764	88.1341	24.4817	0	735.243	224.041
2	group stage	NewZeeland	Kenya	9_wickets	Durban	1	12	2	spin	46.622	75.0308	20.8419	0	863.645	352.443
2	group stage	NewZeeland	Kenya	9_wickets	Durban	1	12	3	spin	45.773	73.6645	20.4624	0	879.664	368.461
2	group stage	NewZeeland	Kenya	9_wickets	Durban	1	12	4	spin	56.632	91.1404	25.3168	0	710.991	199.789
2	group stage	NewZeeland	Kenya	9_wickets	Durban	1	12	5	spin	58.287	93.8038	26.0566	0	690.803	179.601
2	group stage	NewZeeland	Kenya	9_wickets	Durban	1	12	6	spin	57.151	91.9756	25.5488	0	704.535	193.332
2	group stage	NewZeeland	Kenya	9_wickets	Durban	1	12	7	spin	48.229	77.6171	21.5603	0	834.868	323.666
2	group stage	NewZeeland	Kenya	9_wickets	Durban	1	13	1	pace	83.217	133.925	37.2013	0	483.854	27.3487
2	group stage	NewZeeland	Kenya	9_wickets	Durban	1	13	2	pace	84.009	135.199	37.5554	0	479.292	31.9102
2	group stage	NewZeeland	Kenya	9_wickets	Durban	1	13	3	pace	84.576	136.112	37.8089	0	476.079	35.1234
2	group stage	NewZeeland	Kenya	9_wickets	Durban	1	13	4	pace	83.047	133.651	37.1253	0	484.844	26.3582
2	group stage	NewZeeland	Kenya	9_wickets	Durban	1	13	5	pace	82.003	131.971	36.6586	0	491.017	20.1855
2	group stage	NewZeeland	Kenya	9_wickets	Durban	1	13	6	pace	70.992	114.251	31.7363	0	567.175	55.9722
2	group stage	NewZeeland	Kenya	9_wickets	Durban	1	13	7	pace	80.665	129.818	36.0605	0	499.161	12.041
2	group stage	NewZeeland	Kenya	9_wickets	Durban	1	14	1	spin	53.46	86.0355	23.8988	0	753.177	241.975
2	group stage	NewZeeland	Kenya	9_wickets	Durban	1	14	2	spin	46.526	74.8763	20.799	0	865.427	354.225
2	group stage	NewZeeland	Kenya	9_wickets	Durban	1	14	3	spin	57.964	93.284	25.9122	0	694.653	183.45
2	group stage	NewZeeland	Kenya	9_wickets	Durban	1	14	4	spin	48.711	78.3928	21.7758	0	826.607	315.405
2	group stage	NewZeeland	Kenya	9_wickets	Durban	1	14	5	spin	46.648	75.0727	20.8535	0	863.164	351.961
2	group stage	NewZeeland	Kenya	9_wickets	Durban	1	14	6	spin	58.772	94.5844	26.2734	0	685.103	173.9
2	group stage	NewZeeland	Kenya	9_wickets	Durban	1	15	1	pace	82.911	133.432	37.0645	0	485.639	25.5629
2	group stage	NewZeeland	Kenya	9_wickets	Durban	1	15	2	pace	84.578	136.115	37.8097	0	476.068	35.1347
2	group stage	NewZeeland	Kenya	9_wickets	Durban	1	15	3	pace	84.639	136.213	37.837	0	475.725	35.4778
2	group stage	NewZeeland	Kenya	9_wickets	Durban	1	15	4	pace	80.765	129.979	36.1052	0	498.543	12.659
2	group stage	NewZeeland	Kenya	9_wickets	Durban	1	15	5	pace	82.612	132.951	36.9309	0	487.397	23.8052
2	group stage	NewZeeland	Kenya	9_wickets	Durban	1	15	6	pace	78.773	126.773	35.2147	0	511.15	0.0519165
2	group stage	NewZeeland	Kenya	9_wickets	Durban	1	16	1	spin	43.513	70.0274	19.4521	0	925.352	414.15
2	group stage	NewZeeland	Kenya	9_wickets	Durban	1	16	3	spin	58.611	94.3253	26.2015	0	686.985	175.782
2	group stage	NewZeeland	Kenya	9_wickets	Durban	1	16	4	spin	45.53	73.2734	20.3537	0	884.359	373.156
2	group stage	NewZeeland	Kenya	9_wickets	Durban	1	16	5	spin	54.684	88.0054	24.4459	0	736.319	225.116
2	group stage	NewZeeland	Kenya	9_wickets	Durban	1	16	6	spin	55.868	89.9108	24.9752	0	720.714	209.512
2	group stage	NewZeeland	Kenya	9_wickets	Durban	1	17	1	pace	76.972	123.874	34.4096	0	523.11	11.908
2	group stage	NewZeeland	Kenya	9_wickets	Durban	1	17	2	pace	78.724	126.694	35.1928	0	511.469	0.266238
2	group stage	NewZeeland	Kenya	9_wickets	Durban	1	17	3	pace	80.041	128.814	35.7815	0	503.053	8.1495
2	group stage	NewZeeland	Kenya	9_wickets	Durban	1	17	4	pace	78.848	126.894	35.2482	0	510.664	0.538121
2	group stage	NewZeeland	Kenya	9_wickets	Durban	1	17	5	pace	83.058	133.669	37.1302	0	484.78	26.4224
2	group stage	NewZeeland	Kenya	9_wickets	Durban	1	17	6	pace	79.19	127.444	35.4011	0	508.459	2.74354
2	group stage	NewZeeland	Kenya	9_wickets	Durban	2	1	1	pace	73.142	117.711	32.6974	0	550.502	39.3001
2	group stage	NewZeeland	Kenya	9_wickets	Durban	2	1	2	pace	72.284	116.33	32.3138	0	557.037	45.8345
2	group stage	NewZeeland	Kenya	9_wickets	Durban	2	1	3	pace	75.759	121.922	33.8673	0	531.486	20.2837
2	group stage	NewZeeland	Kenya	9_wickets	Durban	2	1	4	pace	73.356	118.055	32.7931	0	548.897	37.6942
2	group stage	NewZeeland	Kenya	9_wickets	Durban	2	1	5	pace	76.177	122.595	34.0542	0	528.57	17.3673
2	group stage	NewZeeland	Kenya	9_wickets	Durban	2	1	6	pace	75.102	120.865	33.5736	0	536.136	24.9332
2	group stage	NewZeeland	Kenya	9_wickets	Durban	2	2	1	pace	77.418	124.592	34.6089	0	520.097	8.89444
2	group stage	NewZeeland	Kenya	9_wickets	Durban	2	2	2	pace	75.037	120.76	33.5445	0	536.6	25.3976
2	group stage	NewZeeland	Kenya	9_wickets	Durban	2	2	3	pace	75.572	121.621	33.7837	0	532.801	21.5989
2	group stage	NewZeeland	Kenya	9_wickets	Durban	2	2	4	pace	73.918	118.959	33.0443	0	544.723	33.5209
2	group stage	NewZeeland	Kenya	9_wickets	Durban	2	2	5	pace	77.395	124.555	34.5987	0	520.251	9.049
2	group stage	NewZeeland	Kenya	9_wickets	Durban	2	2	6	pace	77.045	123.992	34.4422	0	522.615	11.4124
2	group stage	NewZeeland	Kenya	9_wickets	Durban	2	2	7	pace	75.589	121.649	33.7913	0	532.681	21.479
2	group stage	NewZeeland	Kenya	9_wickets	Durban	2	3	2	pace	75.7	121.827	33.8409	0	531.9	20.698
2	group stage	NewZeeland	Kenya	9_wickets	Durban	2	3	3	pace	76.158	122.564	34.0457	0	528.702	17.4992
2	group stage	NewZeeland	Kenya	9_wickets	Durban	2	3	4	pace	76.029	122.357	33.988	0	529.599	18.3963
2	group stage	NewZeeland	Kenya	9_wickets	Durban	2	3	5	pace	78.776	126.778	35.216	0	511.131	0.0713825
2	group stage	NewZeeland	Kenya	9_wickets	Durban	2	3	6	pace	80.341	129.296	35.9156	0	501.174	10.0279
2	group stage	NewZeeland	Kenya	9_wickets	Durban	2	3	7	pace	79.888	128.567	35.7131	0	504.016	7.18606
2	group stage	NewZeeland	Kenya	9_wickets	Durban	2	3	8	pace	77.446	124.637	34.6215	0	519.909	8.7064
2	group stage	NewZeeland	Kenya	9_wickets	Durban	2	4	1	pace	77.666	124.991	34.7198	0	518.436	7.23369
2	group stage	NewZeeland	Kenya	9_wickets	Durban	2	4	2	pace	78.228	125.896	34.971	0	514.712	3.50917
2	group stage	NewZeeland	Kenya	9_wickets	Durban	2	4	3	pace	76.584	123.25	34.2361	0	525.761	14.5583
2	group stage	NewZeeland	Kenya	9_wickets	Durban	2	4	4	pace	76.857	123.689	34.3582	0	523.893	12.6908
2	group stage	NewZeeland	Kenya	9_wickets	Durban	2	4	5	pace	77.313	124.423	34.562	0	520.803	9.60079
2	group stage	NewZeeland	Kenya	9_wickets	Durban	2	4	6	pace	75.897	122.144	33.929	0	530.52	19.3173
2	group stage	NewZeeland	Kenya	9_wickets	Durban	2	5	1	pace	78.815	126.84	35.2335	0	510.878	0.324305
2	group stage	NewZeeland	Kenya	9_wickets	Durban	2	5	2	pace	78.204	125.857	34.9603	0	514.869	3.66713
2	group stage	NewZeeland	Kenya	9_wickets	Durban	2	5	3	pace	76.835	123.654	34.3483	0	524.043	12.8408
2	group stage	NewZeeland	Kenya	9_wickets	Durban	2	5	4	pace	77.281	124.372	34.5477	0	521.019	9.81644
2	group stage	NewZeeland	Kenya	9_wickets	Durban	2	5	5	pace	77.387	124.542	34.5951	0	520.305	9.10278
2	group stage	NewZeeland	Kenya	9_wickets	Durban	2	5	6	pace	76.311	122.811	34.1141	0	527.642	16.4392
2	group stage	NewZeeland	Kenya	9_wickets	Durban	2	5	7	pace	75.464	121.448	33.7354	0	533.564	22.3614
2	group stage	NewZeeland	Kenya	9_wickets	Durban	2	6	1	pace	75.78	121.956	33.8767	0	531.339	20.1364
2	group stage	NewZeeland	Kenya	9_wickets	Durban	2	6	2	pace	76.623	123.313	34.2535	0	525.493	14.2907
2	group stage	NewZeeland	Kenya	9_wickets	Durban	2	6	3	pace	76.369	122.904	34.14	0	527.241	16.0385
2	group stage	NewZeeland	Kenya	9_wickets	Durban	2	6	4	pace	79.165	127.404	35.3899	0	508.619	2.58297
2	group stage	NewZeeland	Kenya	9_wickets	Durban	2	6	5	pace	76.98	123.887	34.4131	0	523.056	11.8537
2	group stage	NewZeeland	Kenya	9_wickets	Durban	2	6	6	pace	76.295	122.785	34.1069	0	527.752	16.5498
2	group stage	NewZeeland	Kenya	9_wickets	Durban	2	7	1	pace	76.7	123.437	34.288	0	524.965	13.7631
2	group stage	NewZeeland	Kenya	9_wickets	Durban	2	7	2	pace	78.147	125.765	34.9348	0	515.245	4.04268
2	group stage	NewZeeland	Kenya	9_wickets	Durban	2	7	3	pace	78.65	126.575	35.1597	0	511.95	0.747467
2	group stage	NewZeeland	Kenya	9_wickets	Durban	2	7	4	pace	81.055	130.445	36.2348	0	496.76	14.4427
2	group stage	NewZeeland	Kenya	9_wickets	Durban	2	7	5	pace	77.077	124.043	34.4565	0	522.398	11.1954
2	group stage	NewZeeland	Kenya	9_wickets	Durban	2	7	6	pace	70.669	113.731	31.5919	0	569.767	58.5645
2	group stage	NewZeeland	Kenya	9_wickets	Durban	2	8	1	pace	68.595	110.393	30.6647	0	586.994	75.7916
2	group stage	NewZeeland	Kenya	9_wickets	Durban	2	8	2	pace	68.659	110.496	30.6933	0	586.447	75.2445
2	group stage	NewZeeland	Kenya	9_wickets	Durban	2	8	3	pace	70.278	113.101	31.4171	0	572.937	61.7345
2	group stage	NewZeeland	Kenya	9_wickets	Durban	2	8	4	pace	69.506	111.859	31.072	0	579.3	68.098
3	group stage	Pakistan	Scotland	51_runs	Durban	1	1	1	pace	76.897	123.754	34.376	0	523.621	12.4182
3	group stage	Pakistan	Scotland	51_runs	Durban	1	1	2	pace	78.626	126.536	35.149	0	512.106	0.903736
3	group stage	Pakistan	Scotland	51_runs	Durban	1	1	3	pace	80.943	130.265	36.1848	0	497.447	13.7553
3	group stage	Pakistan	Scotland	51_runs	Durban	1	1	4	pace	83.427	134.263	37.2952	0	482.636	28.5666
3	group stage	Pakistan	Scotland	51_runs	Durban	1	1	5	pace	84.435	135.885	37.7458	0	476.874	34.3284
3	group stage	Pakistan	Scotland	51_runs	Durban	1	1	6	pace	83	133.576	37.1043	0	485.119	26.0836
3	group stage	Pakistan	Scotland	51_runs	Durban	1	2	1	pace	76.548	123.192	34.22	0	526.008	14.8056
3	group stage	Pakistan	Scotland	51_runs	Durban	1	2	2	pace	81.061	130.455	36.2375	0	496.723	14.4795
3	group stage	Pakistan	Scotland	51_runs	Durban	1	2	3	pace	79.241	127.526	35.4239	0	508.132	3.07079
3	group stage	Pakistan	Scotland	51_runs	Durban	1	2	4	pace	81.472	131.116	36.4212	0	494.217	16.9853
3	group stage	Pakistan	Scotland	51_runs	Durban	1	2	5	pace	81.629	131.369	36.4914	0	493.267	17.9358
3	group stage	Pakistan	Scotland	51_runs	Durban	1	2	6	pace	78.863	126.918	35.2549	0	510.567	0.635251
3	group stage	Pakistan	Scotland	51_runs	Durban	1	3	1	pace	81.559	131.256	36.4601	0	493.69	17.5125
3	group stage	Pakistan	Scotland	51_runs	Durban	1	3	2	pace	82.669	133.043	36.9563	0	487.061	24.1413
3	group stage	Pakistan	Scotland	51_runs	Durban	1	3	3	pace	80.908	130.209	36.1691	0	497.662	13.5402
3	group stage	Pakistan	Scotland	51_runs	Durban	1	3	4	pace	82.358	132.542	36.8173	0	488.9	22.302
3	group stage	Pakistan	Scotland	51_runs	Durban	1	3	5	pace	84.42	135.861	37.7391	0	476.959	34.2437
3	group stage	Pakistan	Scotland	51_runs	Durban	1	3	6	pace	82.076	132.089	36.6913	0	490.58	20.6222
3	group stage	Pakistan	Scotland	51_runs	Durban	1	4	1	pace	72.971	117.435	32.621	0	551.793	40.5902
3	group stage	Pakistan	Scotland	51_runs	Durban	1	4	2	pace	82.485	132.747	36.8741	0	488.148	23.0548
3	group stage	Pakistan	Scotland	51_runs	Durban	1	4	3	pace	82.829	133.3	37.0279	0	486.12	25.0821
3	group stage	Pakistan	Scotland	51_runs	Durban	1	4	4	pace	83.003	133.58	37.1057	0	485.101	26.1012
3	group stage	Pakistan	Scotland	51_runs	Durban	1	4	5	pace	77.545	124.797	34.6657	0	519.245	8.04264
3	group stage	Pakistan	Scotland	51_runs	Durban	1	4	6	pace	77.766	125.152	34.7645	0	517.769	6.56702
3	group stage	Pakistan	Scotland	51_runs	Durban	1	5	1	pace	83.21	133.914	37.1982	0	483.894	27.3079
3	group stage	Pakistan	Scotland	51_runs	Durban	1	5	2	pace	83.991	135.17	37.5473	0	479.395	31.8075
3	group stage	Pakistan	Scotland	51_runs	Durban	1	5	3	pace	81.819	131.675	36.5764	0	492.121	19.0813
3	group stage	Pakistan	Scotland	51_runs	Durban	1	5	4	pace	83.477	134.343	37.3176	0	482.347	28.8557
3	group stage	Pakistan	Scotland	51_runs	Durban	1	5	5	pace	71.224	114.624	31.84	0	565.327	54.1247
3	group stage	Pakistan	Scotland	51_runs	Durban	1	5	6	pace	84.173	135.463	37.6287	0	478.358	32.8441
3	group stage	Pakistan	Scotland	51_runs	Durban	1	6	1	pace	77.856	125.297	34.8047	0	517.171	5.96849
3	group stage	Pakistan	Scotland	51_runs	Durban	1	6	2	pace	77.115	124.105	34.4735	0	522.14	10.938
3	group stage	Pakistan	Scotland	51_runs	Durban	1	6	3	pace	77.616	124.911	34.6975	0	518.77	7.56766
3	group stage	Pakistan	Scotland	51_runs	Durban	1	6	4	pace	75.896	122.143	33.9285	0	530.527	19.3243
3	group stage	Pakistan	Scotland	51_runs	Durban	1	6	5	pace	79.395	127.774	35.4927	0	507.146	4.0564
3	group stage	Pakistan	Scotland	51_runs	Durban	1	6	6	pace	76.775	123.557	34.3215	0	524.453	13.2503
3	group stage	Pakistan	Scotland	51_runs	Durban	1	6	7	pace	77.125	124.121	34.478	0	522.073	10.8703
3	group stage	Pakistan	Scotland	51_runs	Durban	1	6	8	pace	59.055	95.0398	26.3999	0	681.82	170.617
3	group stage	Pakistan	Scotland	51_runs	Durban	1	7	1	spin	44.359	71.3889	19.8302	0	907.704	396.502
3	group stage	Pakistan	Scotland	51_runs	Durban	1	7	2	spin	53.495	86.0919	23.9144	0	752.684	241.482
3	group stage	Pakistan	Scotland	51_runs	Durban	1	7	3	spin	51.829	83.4107	23.1696	0	776.879	265.676
3	group stage	Pakistan	Scotland	51_runs	Durban	1	7	4	spin	51.155	82.326	22.8683	0	787.115	275.912
3	group stage	Pakistan	Scotland	51_runs	Durban	1	7	5	spin	55.392	89.1448	24.7624	0	726.907	215.705
3	group stage	Pakistan	Scotland	51_runs	Durban	1	7	6	spin	54.367	87.4952	24.3042	0	740.612	229.41
3	group stage	Pakistan	Scotland	51_runs	Durban	1	8	1	pace	72.225	116.235	32.2875	0	557.492	46.2896
3	group stage	Pakistan	Scotland	51_runs	Durban	1	8	2	pace	73.449	118.205	32.8346	0	548.202	36.9992
3	group stage	Pakistan	Scotland	51_runs	Durban	1	8	3	pace	71.543	115.137	31.9826	0	562.806	51.604
3	group stage	Pakistan	Scotland	51_runs	Durban	1	8	4	pace	71.085	114.4	31.7778	0	566.432	55.2301
3	group stage	Pakistan	Scotland	51_runs	Durban	1	8	5	pace	73.213	117.825	32.7291	0	549.969	38.7663
3	group stage	Pakistan	Scotland	51_runs	Durban	1	8	6	pace	70.389	113.28	31.4667	0	572.033	60.831
3	group stage	Pakistan	Scotland	51_runs	Durban	1	9	1	spin	49.043	78.9271	21.9242	0	821.011	309.809
3	group stage	Pakistan	Scotland	51_runs	Durban	1	9	2	spin	49.069	78.9689	21.9358	0	820.576	309.374
3	group stage	Pakistan	Scotland	51_runs	Durban	1	9	3	spin	52.356	84.2588	23.4052	0	769.059	257.857
3	group stage	Pakistan	Scotland	51_runs	Durban	1	9	4	spin	52.941	85.2003	23.6667	0	760.561	249.359
3	group stage	Pakistan	Scotland	51_runs	Durban	1	9	5	spin	56.032	90.1748	25.0485	0	718.605	207.402
3	group stage	Pakistan	Scotland	51_runs	Durban	1	9	6	spin	59.502	95.7592	26.5998	0	676.697	165.495
3	group stage	Pakistan	Scotland	51_runs	Durban	1	10	1	pace	73.415	118.15	32.8194	0	548.455	37.253
3	group stage	Pakistan	Scotland	51_runs	Durban	1	10	2	pace	73.778	118.734	32.9817	0	545.757	34.5546
3	group stage	Pakistan	Scotland	51_runs	Durban	1	10	3	pace	72.86	117.257	32.5713	0	552.633	41.4308
3	group stage	Pakistan	Scotland	51_runs	Durban	1	10	4	pace	72.972	117.437	32.6214	0	551.785	40.5826
3	group stage	Pakistan	Scotland	51_runs	Durban	1	10	5	pace	70.43	113.346	31.485	0	571.7	60.498
3	group stage	Pakistan	Scotland	51_runs	Durban	1	10	6	pace	72.387	116.496	32.3599	0	556.244	45.0419
3	group stage	Pakistan	Scotland	51_runs	Durban	1	11	1	pace	75.483	121.478	33.7439	0	533.429	22.2271
3	group stage	Pakistan	Scotland	51_runs	Durban	1	11	2	pace	75.267	121.13	33.6474	0	534.96	23.7579
3	group stage	Pakistan	Scotland	51_runs	Durban	1	11	3	pace	58.314	93.8473	26.0687	0	690.483	179.281
3	group stage	Pakistan	Scotland	51_runs	Durban	1	11	4	pace	75.33	121.232	33.6755	0	534.513	23.3105
3	group stage	Pakistan	Scotland	51_runs	Durban	1	11	5	pace	61.731	99.3464	27.5962	0	652.263	141.061
3	group stage	Pakistan	Scotland	51_runs	Durban	1	11	6	pace	75.882	122.12	33.9223	0	530.625	19.4222
3	group stage	Pakistan	Scotland	51_runs	Durban	1	12	1	pace	78.049	125.608	34.891	0	515.892	4.68963
3	group stage	Pakistan	Scotland	51_runs	Durban	1	12	2	pace	82.847	133.329	37.0359	0	486.015	25.1877
3	group stage	Pakistan	Scotland	51_runs	Durban	1	12	3	pace	81.084	130.492	36.2478	0	496.582	14.6204
3	group stage	Pakistan	Scotland	51_runs	Durban	1	12	4	pace	81.751	131.565	36.546	0	492.53	18.6719
3	group stage	Pakistan	Scotland	51_runs	Durban	1	12	5	pace	80.144	128.979	35.8276	0	502.406	8.79602
3	group stage	Pakistan	Scotland	51_runs	Durban	1	12	6	pace	81.221	130.713	36.309	0	495.744	15.458
3	group stage	Pakistan	Scotland	51_runs	Durban	1	13	1	spin	54.642	87.9378	24.4272	0	736.885	225.682
3	group stage	Pakistan	Scotland	51_runs	Durban	1	13	2	spin	45.907	73.8802	20.5223	0	877.096	365.894
3	group stage	Pakistan	Scotland	51_runs	Durban	1	13	3	spin	49.856	80.2355	22.2876	0	807.623	296.421
3	group stage	Pakistan	Scotland	51_runs	Durban	1	13	4	spin	55.307	89.008	24.7244	0	728.025	216.822
3	group stage	Pakistan	Scotland	51_runs	Durban	1	13	5	spin	57.168	92.003	25.5564	0	704.325	193.123
3	group stage	Pakistan	Scotland	51_runs	Durban	1	13	6	spin	53.199	85.6155	23.7821	0	756.872	245.67
3	group stage	Pakistan	Scotland	51_runs	Durban	1	14	1	pace	71.403	114.912	31.92	0	563.91	52.7075
3	group stage	Pakistan	Scotland	51_runs	Durban	1	14	2	pace	70.681	113.75	31.5972	0	569.67	58.4678
3	group stage	Pakistan	Scotland	51_runs	Durban	1	14	3	pace	70.993	114.252	31.7367	0	567.167	55.9642
3	group stage	Pakistan	Scotland	51_runs	Durban	1	14	4	pace	69.337	111.587	30.9964	0	580.712	69.51
3	group stage	Pakistan	Scotland	51_runs	Durban	1	14	5	pace	71.626	115.271	32.0197	0	562.154	50.9518
3	group stage	Pakistan	Scotland	51_runs	Durban	1	14	6	pace	71.91	115.728	32.1466	0	559.934	48.7316
3	group stage	Pakistan	Scotland	51_runs	Durban	1	14	7	pace	70.973	114.22	31.7278	0	567.326	56.124
3	group stage	Pakistan	Scotland	51_runs	Durban	1	15	1	pace	77.772	125.162	34.7672	0	517.729	6.52708
3	group stage	Pakistan	Scotland	51_runs	Durban	1	15	2	pace	77.745	125.118	34.7551	0	517.909	6.70688
3	group stage	Pakistan	Scotland	51_runs	Durban	1	15	3	pace	77.926	125.41	34.836	0	516.706	5.50392
3	group stage	Pakistan	Scotland	51_runs	Durban	1	15	4	pace	69.221	111.4	30.9446	0	581.686	70.4832
3	group stage	Pakistan	Scotland	51_runs	Durban	1	15	5	pace	83.494	134.371	37.3252	0	482.248	28.9539
3	group stage	Pakistan	Scotland	51_runs	Durban	1	15	6	pace	80.359	129.325	35.9237	0	501.062	10.1402
3	group stage	Pakistan	Scotland	51_runs	Durban	1	16	1	spin	53.224	85.6557	23.7933	0	756.517	245.315
3	group stage	Pakistan	Scotland	51_runs	Durban	1	16	2	spin	45.644	73.4569	20.4047	0	882.15	370.948
3	group stage	Pakistan	Scotland	51_runs	Durban	1	16	3	spin	49.934	80.361	22.3225	0	806.361	295.159
3	group stage	Pakistan	Scotland	51_runs	Durban	1	16	4	spin	54.184	87.2007	24.2224	0	743.113	231.911
3	group stage	Pakistan	Scotland	51_runs	Durban	1	16	5	spin	51.733	83.2562	23.1267	0	778.32	267.118
3	group stage	Pakistan	Scotland	51_runs	Durban	1	16	6	spin	48.907	78.7082	21.8634	0	823.294	312.092
3	group stage	Pakistan	Scotland	51_runs	Durban	1	17	1	pace	61.171	98.4452	27.3459	0	658.234	147.032
3	group stage	Pakistan	Scotland	51_runs	Durban	1	17	2	pace	76.865	123.702	34.3617	0	523.839	12.6362
3	group stage	Pakistan	Scotland	51_runs	Durban	1	17	3	pace	65.003	104.612	29.0589	0	619.431	108.228
3	group stage	Pakistan	Scotland	51_runs	Durban	1	17	4	pace	75.553	121.591	33.7752	0	532.935	21.7328
3	group stage	Pakistan	Scotland	51_runs	Durban	1	17	5	pace	67.337	108.368	30.1023	0	597.96	86.758
3	group stage	Pakistan	Scotland	51_runs	Durban	1	17	6	pace	69.544	111.92	31.0889	0	578.984	67.7815
3	group stage	Pakistan	Scotland	51_runs	Durban	1	17	7	pace	68.181	109.727	30.4796	0	590.558	79.3559
3	group stage	Pakistan	Scotland	51_runs	Durban	1	18	1	pace	70.842	114.009	31.6692	0	568.375	57.1731
3	group stage	Pakistan	Scotland	51_runs	Durban	1	18	2	pace	70.433	113.351	31.4864	0	571.676	60.4736
3	group stage	Pakistan	Scotland	51_runs	Durban	1	18	3	pace	70.858	114.035	31.6764	0	568.247	57.0448
3	group stage	Pakistan	Scotland	51_runs	Durban	1	18	4	pace	70.554	113.546	31.5405	0	570.696	59.4932
3	group stage	Pakistan	Scotland	51_runs	Durban	1	18	5	pace	70.807	113.953	31.6536	0	568.656	57.454
3	group stage	Pakistan	Scotland	51_runs	Durban	1	18	6	pace	71.086	114.402	31.7783	0	566.425	55.2222
3	group stage	Pakistan	Scotland	51_runs	Durban	1	19	1	pace	77.187	124.22	34.5057	0	521.653	10.4509
3	group stage	Pakistan	Scotland	51_runs	Durban	1	19	2	pace	75.002	120.704	33.5289	0	536.85	25.648
3	group stage	Pakistan	Scotland	51_runs	Durban	1	19	3	pace	75.515	121.53	33.7582	0	533.203	22.001
3	group stage	Pakistan	Scotland	51_runs	Durban	1	19	4	pace	77.6	124.885	34.6903	0	518.877	7.67462
3	group stage	Pakistan	Scotland	51_runs	Durban	1	19	5	pace	77.011	123.937	34.427	0	522.845	11.6431
3	group stage	Pakistan	Scotland	51_runs	Durban	1	19	6	pace	77.159	124.175	34.4932	0	521.843	10.6402
3	group stage	Pakistan	Scotland	51_runs	Durban	1	20	1	pace	76.842	123.665	34.3514	0	523.995	12.793
3	group stage	Pakistan	Scotland	51_runs	Durban	1	20	2	pace	82.027	132.01	36.6694	0	490.873	20.3292
3	group stage	Pakistan	Scotland	51_runs	Durban	1	20	3	pace	82.449	132.689	36.858	0	488.361	22.8416
3	group stage	Pakistan	Scotland	51_runs	Durban	1	20	5	pace	82.837	133.313	37.0315	0	486.073	25.1291
3	group stage	Pakistan	Scotland	51_runs	Durban	1	20	6	pace	81.147	130.593	36.276	0	496.196	15.0059
3	group stage	Pakistan	Scotland	51_runs	Durban	2	1	1	pace	80.104	128.915	35.8097	0	502.657	8.54514
3	group stage	Pakistan	Scotland	51_runs	Durban	2	1	2	pace	83.526	134.422	37.3395	0	482.064	29.1386
3	group stage	Pakistan	Scotland	51_runs	Durban	2	1	3	pace	82.245	132.36	36.7668	0	489.572	21.6303
3	group stage	Pakistan	Scotland	51_runs	Durban	2	1	4	pace	80.924	130.235	36.1763	0	497.564	13.6385
3	group stage	Pakistan	Scotland	51_runs	Durban	2	1	5	pace	81.102	130.521	36.2558	0	496.472	14.7306
3	group stage	Pakistan	Scotland	51_runs	Durban	2	1	6	pace	83.651	134.623	37.3953	0	481.343	29.859
3	group stage	Pakistan	Scotland	51_runs	Durban	2	2	1	pace	84.937	136.693	37.9702	0	474.056	37.1468
3	group stage	Pakistan	Scotland	51_runs	Durban	2	2	2	pace	88.643	142.657	39.627	0	454.236	56.9662
3	group stage	Pakistan	Scotland	51_runs	Durban	2	2	3	pace	86.384	139.022	38.6171	0	466.115	45.0876
3	group stage	Pakistan	Scotland	51_runs	Durban	2	2	4	pace	86.763	139.632	38.7865	0	464.079	47.1237
3	group stage	Pakistan	Scotland	51_runs	Durban	2	2	5	pace	87.336	140.554	39.0427	0	461.034	50.1685
3	group stage	Pakistan	Scotland	51_runs	Durban	2	2	6	pace	87.01	140.029	38.897	0	462.761	48.4411
3	group stage	Pakistan	Scotland	51_runs	Durban	2	2	7	pace	87.524	140.856	39.1267	0	460.044	51.1588
3	group stage	Pakistan	Scotland	51_runs	Durban	2	3	1	pace	82.94	133.479	37.0775	0	485.47	25.7327
3	group stage	Pakistan	Scotland	51_runs	Durban	2	3	2	pace	84.276	135.629	37.6747	0	477.774	33.4287
3	group stage	Pakistan	Scotland	51_runs	Durban	2	3	3	pace	83.658	134.635	37.3985	0	481.303	29.8993
3	group stage	Pakistan	Scotland	51_runs	Durban	2	3	4	pace	77.136	124.138	34.4829	0	521.998	10.7958
3	group stage	Pakistan	Scotland	51_runs	Durban	2	3	5	pace	83.443	134.288	37.3024	0	482.543	28.6591
3	group stage	Pakistan	Scotland	51_runs	Durban	2	3	6	pace	83.087	133.716	37.1432	0	484.611	26.5916
3	group stage	Pakistan	Scotland	51_runs	Durban	2	4	1	pace	87.273	140.452	39.0145	0	461.367	49.8357
3	group stage	Pakistan	Scotland	51_runs	Durban	2	4	2	pace	88.075	141.743	39.373	0	457.166	54.0368
3	group stage	Pakistan	Scotland	51_runs	Durban	2	4	3	pace	88.456	142.356	39.5434	0	455.196	56.0059
3	group stage	Pakistan	Scotland	51_runs	Durban	2	4	4	pace	87.437	140.716	39.0878	0	460.501	50.701
3	group stage	Pakistan	Scotland	51_runs	Durban	2	4	5	pace	76.382	122.925	34.1458	0	527.151	15.9487
3	group stage	Pakistan	Scotland	51_runs	Durban	2	4	6	pace	86.079	138.531	38.4808	0	467.766	43.4361
3	group stage	Pakistan	Scotland	51_runs	Durban	2	4	7	pace	73.998	119.088	33.0801	0	544.134	32.932
3	group stage	Pakistan	Scotland	51_runs	Durban	2	5	1	pace	82.69	133.077	36.9657	0	486.937	24.265
3	group stage	Pakistan	Scotland	51_runs	Durban	2	5	2	pace	83.289	134.041	37.2335	0	483.435	27.7669
3	group stage	Pakistan	Scotland	51_runs	Durban	2	5	3	pace	83.687	134.681	37.4114	0	481.136	30.0661
3	group stage	Pakistan	Scotland	51_runs	Durban	2	5	4	pace	82.382	132.581	36.828	0	488.758	22.4445
3	group stage	Pakistan	Scotland	51_runs	Durban	2	5	5	pace	83.648	134.618	37.394	0	481.361	29.8417
3	group stage	Pakistan	Scotland	51_runs	Durban	2	5	6	pace	71.22	114.617	31.8382	0	565.359	54.1564
3	group stage	Pakistan	Scotland	51_runs	Durban	2	6	1	pace	88.075	141.743	39.373	0	457.166	54.0368
3	group stage	Pakistan	Scotland	51_runs	Durban	2	6	2	pace	86.747	139.606	38.7794	0	464.164	47.0381
3	group stage	Pakistan	Scotland	51_runs	Durban	2	6	3	pace	86.029	138.45	38.4584	0	468.038	43.1642
3	group stage	Pakistan	Scotland	51_runs	Durban	2	6	4	pace	84.652	136.234	37.8428	0	475.652	35.5508
3	group stage	Pakistan	Scotland	51_runs	Durban	2	6	5	pace	84.161	135.444	37.6233	0	478.427	32.7758
3	group stage	Pakistan	Scotland	51_runs	Durban	2	6	6	pace	87.665	141.083	39.1898	0	459.304	51.8987
3	group stage	Pakistan	Scotland	51_runs	Durban	2	7	1	spin	54.888	88.3337	24.5371	0	733.582	222.38
3	group stage	Pakistan	Scotland	51_runs	Durban	2	7	2	spin	56.691	91.2353	25.3431	0	710.251	199.049
3	group stage	Pakistan	Scotland	51_runs	Durban	2	7	3	spin	57.334	92.2701	25.6306	0	702.286	191.083
3	group stage	Pakistan	Scotland	51_runs	Durban	2	7	4	spin	57.586	92.6757	25.7432	0	699.213	188.01
3	group stage	Pakistan	Scotland	51_runs	Durban	2	7	5	spin	57.513	92.5582	25.7106	0	700.1	188.898
3	group stage	Pakistan	Scotland	51_runs	Durban	2	7	6	spin	57.187	92.0336	25.5649	0	704.091	192.889
3	group stage	Pakistan	Scotland	51_runs	Durban	2	7	7	spin	58.378	93.9503	26.0973	0	689.726	178.524
3	group stage	Pakistan	Scotland	51_runs	Durban	2	8	1	spin	60.864	97.9511	27.2086	0	661.555	150.352
3	group stage	Pakistan	Scotland	51_runs	Durban	2	8	2	spin	56.925	91.6119	25.4478	0	707.332	196.129
3	group stage	Pakistan	Scotland	51_runs	Durban	2	8	3	spin	60.193	96.8712	26.9087	0	668.929	157.727
3	group stage	Pakistan	Scotland	51_runs	Durban	2	8	4	spin	64.428	103.687	28.8019	0	624.959	113.757
3	group stage	Pakistan	Scotland	51_runs	Durban	2	8	5	spin	62.576	100.706	27.974	0	643.455	132.253
3	group stage	Pakistan	Scotland	51_runs	Durban	2	8	6	spin	56.553	91.0132	25.2815	0	711.984	200.782
3	group stage	Pakistan	Scotland	51_runs	Durban	2	9	1	spin	54.466	87.6545	24.3485	0	739.266	228.063
3	group stage	Pakistan	Scotland	51_runs	Durban	2	9	2	spin	57.916	93.2068	25.8908	0	695.228	184.026
3	group stage	Pakistan	Scotland	51_runs	Durban	2	9	3	spin	57.045	91.805	25.5014	0	705.844	194.641
3	group stage	Pakistan	Scotland	51_runs	Durban	2	9	4	spin	55.252	88.9195	24.6999	0	728.749	217.547
3	group stage	Pakistan	Scotland	51_runs	Durban	2	9	5	spin	57.47	92.489	25.6914	0	700.624	189.422
3	group stage	Pakistan	Scotland	51_runs	Durban	2	10	1	spin	56.05	90.2037	25.0566	0	718.374	207.171
3	group stage	Pakistan	Scotland	51_runs	Durban	2	10	2	spin	55.147	88.7505	24.6529	0	730.137	218.934
3	group stage	Pakistan	Scotland	51_runs	Durban	2	10	3	spin	56.039	90.186	25.0517	0	718.515	207.312
3	group stage	Pakistan	Scotland	51_runs	Durban	2	10	4	spin	50.324	80.9886	22.4968	0	800.112	288.91
3	group stage	Pakistan	Scotland	51_runs	Durban	2	10	5	spin	57.256	92.1446	25.5957	0	703.243	192.04
3	group stage	Pakistan	Scotland	51_runs	Durban	2	10	6	spin	64.701	104.126	28.9239	0	622.322	111.12
3	group stage	Pakistan	Scotland	51_runs	Durban	2	11	1	spin	54.822	88.2275	24.5076	0	734.465	223.263
3	group stage	Pakistan	Scotland	51_runs	Durban	2	11	2	spin	55.479	89.2848	24.8013	0	725.767	214.565
3	group stage	Pakistan	Scotland	51_runs	Durban	2	11	3	spin	57.913	93.2019	25.8894	0	695.265	184.062
3	group stage	Pakistan	Scotland	51_runs	Durban	2	11	4	spin	57.24	92.1189	25.5886	0	703.439	192.237
3	group stage	Pakistan	Scotland	51_runs	Durban	2	11	5	spin	53.897	86.7388	24.0941	0	747.07	235.868
3	group stage	Pakistan	Scotland	51_runs	Durban	2	11	6	spin	58.626	94.3494	26.2082	0	686.809	175.606
3	group stage	Pakistan	Scotland	51_runs	Durban	2	12	1	spin	57.763	92.9605	25.8224	0	697.07	185.868
3	group stage	Pakistan	Scotland	51_runs	Durban	2	12	3	spin	54.702	88.0343	24.454	0	736.076	224.874
3	group stage	Pakistan	Scotland	51_runs	Durban	2	12	4	spin	50.98	82.0444	22.7901	0	789.817	278.614
3	group stage	Pakistan	Scotland	51_runs	Durban	2	12	5	spin	64.434	103.696	28.8046	0	624.901	113.698
3	group stage	Pakistan	Scotland	51_runs	Durban	2	12	6	spin	42.505	68.4052	19.0014	0	947.297	436.095
3	group stage	Pakistan	Scotland	51_runs	Durban	2	12	7	spin	75.732	121.879	33.8552	0	531.676	20.4732
3	group stage	Pakistan	Scotland	51_runs	Durban	2	13	1	spin	55.934	90.017	25.0047	0	719.864	208.661
3	group stage	Pakistan	Scotland	51_runs	Durban	2	13	2	spin	55.185	88.8116	24.6699	0	729.634	218.432
3	group stage	Pakistan	Scotland	51_runs	Durban	2	13	3	spin	58.609	94.322	26.2006	0	687.008	175.806
3	group stage	Pakistan	Scotland	51_runs	Durban	2	13	4	spin	55.401	89.1593	24.7665	0	726.789	215.587
3	group stage	Pakistan	Scotland	51_runs	Durban	2	13	5	spin	53.984	86.8788	24.133	0	745.866	234.664
3	group stage	Pakistan	Scotland	51_runs	Durban	2	13	6	spin	56.956	91.6618	25.4616	0	706.947	195.744
3	group stage	Pakistan	Scotland	51_runs	Durban	2	14	1	pace	82.542	132.838	36.8996	0	487.81	23.3919
3	group stage	Pakistan	Scotland	51_runs	Durban	2	14	2	pace	83.824	134.902	37.4727	0	480.35	30.8524
3	group stage	Pakistan	Scotland	51_runs	Durban	2	14	3	pace	84.983	136.767	37.9908	0	473.799	37.4034
3	group stage	Pakistan	Scotland	51_runs	Durban	2	14	4	pace	83.498	134.377	37.3269	0	482.225	28.977
3	group stage	Pakistan	Scotland	51_runs	Durban	2	14	5	pace	83.446	134.293	37.3037	0	482.526	28.6765
3	group stage	Pakistan	Scotland	51_runs	Durban	2	14	6	pace	81.749	131.562	36.5451	0	492.542	18.6599
3	group stage	Pakistan	Scotland	51_runs	Durban	2	15	1	spin	51.537	82.9408	23.0391	0	781.281	270.078
3	group stage	Pakistan	Scotland	51_runs	Durban	2	15	2	spin	50.394	81.1013	22.5281	0	799.001	287.799
3	group stage	Pakistan	Scotland	51_runs	Durban	2	15	3	spin	60.541	97.4313	27.0642	0	665.084	153.882
3	group stage	Pakistan	Scotland	51_runs	Durban	2	15	4	spin	56.848	91.488	25.4133	0	708.29	197.087
3	group stage	Pakistan	Scotland	51_runs	Durban	2	15	5	spin	55.547	89.3942	24.8317	0	724.879	213.677
3	group stage	Pakistan	Scotland	51_runs	Durban	2	15	6	spin	59.065	95.0559	26.4044	0	681.704	170.502
3	group stage	Pakistan	Scotland	51_runs	Durban	2	15	7	spin	60.732	97.7387	27.1496	0	662.992	151.79
3	group stage	Pakistan	Scotland	51_runs	Durban	2	16	1	pace	73.385	118.102	32.806	0	548.68	37.4773
3	group stage	Pakistan	Scotland	51_runs	Durban	2	16	2	pace	83.903	135.029	37.508	0	479.898	31.3047
3	group stage	Pakistan	Scotland	51_runs	Durban	2	16	3	pace	72.797	117.155	32.5432	0	553.111	41.9091
3	group stage	Pakistan	Scotland	51_runs	Durban	2	16	4	pace	83.185	133.873	37.187	0	484.04	27.1625
3	group stage	Pakistan	Scotland	51_runs	Durban	2	16	5	pace	71.705	115.398	32.055	0	561.535	50.3325
3	group stage	Pakistan	Scotland	51_runs	Durban	2	16	6	pace	69.967	112.601	31.278	0	575.483	64.2811
3	group stage	Pakistan	Scotland	51_runs	Durban	2	17	1	pace	83.944	135.095	37.5263	0	479.663	31.5391
3	group stage	Pakistan	Scotland	51_runs	Durban	2	17	2	pace	85.285	137.253	38.1258	0	472.121	39.0812
3	group stage	Pakistan	Scotland	51_runs	Durban	2	17	3	pace	86.761	139.628	38.7856	0	464.089	47.113
3	group stage	Pakistan	Scotland	51_runs	Durban	2	17	4	pace	86.57	139.321	38.7003	0	465.113	46.0891
3	group stage	Pakistan	Scotland	51_runs	Durban	2	17	5	pace	87.408	140.67	39.0749	0	460.654	50.5483
3	group stage	Pakistan	Scotland	51_runs	Durban	2	17	6	pace	85.678	137.885	38.3015	0	469.956	41.2468
3	group stage	Pakistan	Scotland	51_runs	Durban	2	17	7	pace	85.174	137.074	38.0762	0	472.736	38.4659
3	group stage	Pakistan	Scotland	51_runs	Durban	2	18	1	pace	83.625	134.581	37.3837	0	481.493	29.7093
3	group stage	Pakistan	Scotland	51_runs	Durban	2	18	2	pace	81.928	131.85	36.6251	0	491.466	19.736
3	group stage	Pakistan	Scotland	51_runs	Durban	2	18	3	pace	82.461	132.708	36.8634	0	488.29	22.9127
3	group stage	Pakistan	Scotland	51_runs	Durban	2	18	4	pace	68.722	110.597	30.7215	0	585.909	74.7069
3	group stage	Pakistan	Scotland	51_runs	Durban	2	18	5	pace	83.661	134.639	37.3998	0	481.286	29.9165
3	group stage	Pakistan	Scotland	51_runs	Durban	2	18	6	pace	84.059	135.28	37.5777	0	479.007	32.1953
3	group stage	Pakistan	Scotland	51_runs	Durban	2	19	1	spin	45.539	73.2879	20.3578	0	884.184	372.982
3	group stage	Pakistan	Scotland	51_runs	Durban	2	19	2	spin	49.817	80.1727	22.2702	0	808.255	297.053
3	group stage	Pakistan	Scotland	51_runs	Durban	2	19	3	spin	48.39	77.8762	21.6323	0	832.09	320.888
3	group stage	Pakistan	Scotland	51_runs	Durban	2	19	4	spin	53.279	85.7442	23.8178	0	755.736	244.534
3	group stage	Pakistan	Scotland	51_runs	Durban	2	19	5	spin	49.411	79.5193	22.0887	0	814.897	303.694
3	group stage	Pakistan	Scotland	51_runs	Durban	2	19	6	spin	47.912	77.1069	21.4186	0	840.392	329.189
3	group stage	Pakistan	Scotland	51_runs	Durban	2	20	1	pace	78.265	125.955	34.9876	0	514.468	3.26584
3	group stage	Pakistan	Scotland	51_runs	Durban	2	20	2	pace	78.988	127.119	35.3108	0	509.759	1.44323
3	group stage	Pakistan	Scotland	51_runs	Durban	2	20	3	pace	62.512	100.603	27.9454	0	644.114	132.912
3	group stage	Pakistan	Scotland	51_runs	Durban	2	20	4	pace	62.975	101.348	28.1523	0	639.378	128.176
3	group stage	Pakistan	Scotland	51_runs	Durban	2	20	5	pace	79.24	127.524	35.4234	0	508.138	3.06438
4	group stage	Zimbabwe	Australia	5_wickets	Kapstadt	1	1	1	pace	77.743	125.115	34.7542	0	517.923	6.7202
4	group stage	Zimbabwe	Australia	5_wickets	Kapstadt	1	1	2	pace	79.927	128.63	35.7306	0	503.77	7.432
4	group stage	Zimbabwe	Australia	5_wickets	Kapstadt	1	1	3	pace	78.893	126.966	35.2683	0	510.373	0.829401
4	group stage	Zimbabwe	Australia	5_wickets	Kapstadt	1	1	4	pace	77.816	125.233	34.7869	0	517.437	6.23434
4	group stage	Zimbabwe	Australia	5_wickets	Kapstadt	1	1	5	pace	79.208	127.473	35.4091	0	508.343	2.85909
4	group stage	Zimbabwe	Australia	5_wickets	Kapstadt	1	1	6	pace	83.837	134.923	37.4785	0	480.275	30.9269
4	group stage	Zimbabwe	Australia	5_wickets	Kapstadt	1	2	1	pace	74.273	119.531	33.203	0	542.12	30.9173
4	group stage	Zimbabwe	Australia	5_wickets	Kapstadt	1	2	2	pace	75.312	121.203	33.6675	0	534.641	23.4383
4	group stage	Zimbabwe	Australia	5_wickets	Kapstadt	1	2	3	pace	70.836	113.999	31.6665	0	568.424	57.2212
4	group stage	Zimbabwe	Australia	5_wickets	Kapstadt	1	2	4	pace	75.45	121.425	33.7292	0	533.663	22.4604
4	group stage	Zimbabwe	Australia	5_wickets	Kapstadt	1	2	5	pace	86.795	139.683	38.8008	0	463.908	47.2948
4	group stage	Zimbabwe	Australia	5_wickets	Kapstadt	1	2	6	pace	77.235	124.298	34.5271	0	521.329	10.1268
4	group stage	Zimbabwe	Australia	5_wickets	Kapstadt	1	2	7	pace	67.538	108.692	30.1922	0	596.181	84.9784
4	group stage	Zimbabwe	Australia	5_wickets	Kapstadt	1	3	1	pace	77.789	125.189	34.7748	0	517.616	6.41393
4	group stage	Zimbabwe	Australia	5_wickets	Kapstadt	1	3	2	pace	78.086	125.667	34.9076	0	515.648	4.44518
4	group stage	Zimbabwe	Australia	5_wickets	Kapstadt	1	3	4	pace	78.154	125.777	34.938	0	515.199	3.99653
4	group stage	Zimbabwe	Australia	5_wickets	Kapstadt	1	3	5	pace	77.294	124.393	34.5535	0	520.931	9.72881
4	group stage	Zimbabwe	Australia	5_wickets	Kapstadt	1	3	6	pace	80.424	129.43	35.9527	0	500.657	10.5452
4	group stage	Zimbabwe	Australia	5_wickets	Kapstadt	1	4	1	pace	76.617	123.303	34.2509	0	525.534	14.3318
4	group stage	Zimbabwe	Australia	5_wickets	Kapstadt	1	4	2	pace	84.157	135.438	37.6215	0	478.449	32.7531
4	group stage	Zimbabwe	Australia	5_wickets	Kapstadt	1	4	3	pace	57.367	92.3232	25.6453	0	701.882	190.679
4	group stage	Zimbabwe	Australia	5_wickets	Kapstadt	1	4	4	pace	74.177	119.376	33.1601	0	542.821	31.6189
4	group stage	Zimbabwe	Australia	5_wickets	Kapstadt	1	4	5	pace	72.88	117.289	32.5803	0	552.482	41.2792
4	group stage	Zimbabwe	Australia	5_wickets	Kapstadt	1	4	6	pace	72.475	116.637	32.3992	0	555.569	44.3665
4	group stage	Zimbabwe	Australia	5_wickets	Kapstadt	1	5	1	pace	75.873	122.106	33.9183	0	530.688	19.4852
4	group stage	Zimbabwe	Australia	5_wickets	Kapstadt	1	5	2	pace	75.374	121.303	33.6952	0	534.201	22.9985
4	group stage	Zimbabwe	Australia	5_wickets	Kapstadt	1	5	3	pace	73.847	118.845	33.0126	0	545.247	34.0446
4	group stage	Zimbabwe	Australia	5_wickets	Kapstadt	1	5	4	pace	74.741	120.284	33.4122	0	538.725	27.5228
4	group stage	Zimbabwe	Australia	5_wickets	Kapstadt	1	5	5	pace	76.927	123.802	34.3894	0	523.416	12.214
4	group stage	Zimbabwe	Australia	5_wickets	Kapstadt	1	5	6	pace	76.182	122.603	34.0564	0	528.535	17.3326
4	group stage	Zimbabwe	Australia	5_wickets	Kapstadt	1	6	1	pace	73.015	117.506	32.6406	0	551.46	40.2577
4	group stage	Zimbabwe	Australia	5_wickets	Kapstadt	1	6	2	pace	75.089	120.844	33.5678	0	536.228	25.026
4	group stage	Zimbabwe	Australia	5_wickets	Kapstadt	1	6	3	pace	71.942	115.779	32.161	0	559.685	48.4826
4	group stage	Zimbabwe	Australia	5_wickets	Kapstadt	1	6	5	pace	77.691	125.032	34.731	0	518.269	7.06686
4	group stage	Zimbabwe	Australia	5_wickets	Kapstadt	1	6	6	pace	55.367	89.1045	24.7513	0	727.236	216.033
4	group stage	Zimbabwe	Australia	5_wickets	Kapstadt	1	7	1	pace	78.272	125.967	34.9907	0	514.422	3.21983
4	group stage	Zimbabwe	Australia	5_wickets	Kapstadt	1	7	2	pace	77.251	124.323	34.5343	0	521.221	10.0188
4	group stage	Zimbabwe	Australia	5_wickets	Kapstadt	1	7	3	pace	77.763	125.147	34.7632	0	517.789	6.587
4	group stage	Zimbabwe	Australia	5_wickets	Kapstadt	1	7	4	pace	76.319	122.824	34.1176	0	527.586	16.3839
4	group stage	Zimbabwe	Australia	5_wickets	Kapstadt	1	7	5	pace	76.804	123.604	34.3345	0	524.255	13.0523
4	group stage	Zimbabwe	Australia	5_wickets	Kapstadt	1	7	6	pace	68.593	110.39	30.6638	0	587.011	75.8088
4	group stage	Zimbabwe	Australia	5_wickets	Kapstadt	1	7	7	pace	76.538	123.176	34.2155	0	526.077	14.8743
4	group stage	Zimbabwe	Australia	5_wickets	Kapstadt	1	8	1	pace	74.786	120.356	33.4323	0	538.401	27.1986
4	group stage	Zimbabwe	Australia	5_wickets	Kapstadt	1	8	2	pace	74.433	119.788	33.2745	0	540.954	29.752
4	group stage	Zimbabwe	Australia	5_wickets	Kapstadt	1	8	3	pace	77.361	124.5	34.5835	0	520.48	9.27765
4	group stage	Zimbabwe	Australia	5_wickets	Kapstadt	1	8	4	pace	76.743	123.506	34.3072	0	524.671	13.469
4	group stage	Zimbabwe	Australia	5_wickets	Kapstadt	1	8	6	pace	75.736	121.885	33.857	0	531.647	20.4451
4	group stage	Zimbabwe	Australia	5_wickets	Kapstadt	1	9	1	spin	44.366	71.4002	19.8334	0	907.561	396.359
4	group stage	Zimbabwe	Australia	5_wickets	Kapstadt	1	9	2	spin	50.352	81.0337	22.5094	0	799.667	288.465
4	group stage	Zimbabwe	Australia	5_wickets	Kapstadt	1	9	3	spin	50.035	80.5235	22.3676	0	804.734	293.531
4	group stage	Zimbabwe	Australia	5_wickets	Kapstadt	1	9	4	spin	53.197	85.6123	23.7812	0	756.901	245.698
4	group stage	Zimbabwe	Australia	5_wickets	Kapstadt	1	9	5	spin	43.003	69.2066	19.2241	0	936.327	425.124
4	group stage	Zimbabwe	Australia	5_wickets	Kapstadt	1	9	6	spin	51.146	82.3115	22.8643	0	787.253	276.051
4	group stage	Zimbabwe	Australia	5_wickets	Kapstadt	1	10	1	pace	83.465	134.324	37.3122	0	482.416	28.7863
4	group stage	Zimbabwe	Australia	5_wickets	Kapstadt	1	10	2	pace	78.028	125.574	34.8816	0	516.031	4.82847
4	group stage	Zimbabwe	Australia	5_wickets	Kapstadt	1	10	3	pace	33.728	54.28	15.0778	1	1193.81	682.609
4	group stage	Zimbabwe	Australia	5_wickets	Kapstadt	1	10	4	pace	84.396	135.822	37.7284	0	477.094	34.108
4	group stage	Zimbabwe	Australia	5_wickets	Kapstadt	1	10	5	pace	58.422	94.0211	26.117	0	689.207	178.005
4	group stage	Zimbabwe	Australia	5_wickets	Kapstadt	1	10	6	pace	78.323	126.049	35.0135	0	514.087	2.88487
4	group stage	Zimbabwe	Australia	5_wickets	Kapstadt	1	10	7	pace	75.861	122.086	33.9129	0	530.771	19.5691
4	group stage	Zimbabwe	Australia	5_wickets	Kapstadt	1	11	2	spin	53.64	86.3252	23.9792	0	750.65	239.447
4	group stage	Zimbabwe	Australia	5_wickets	Kapstadt	1	11	3	spin	49.589	79.8058	22.1683	0	811.971	300.769
4	group stage	Zimbabwe	Australia	5_wickets	Kapstadt	1	11	4	spin	54.011	86.9223	24.1451	0	745.494	234.291
4	group stage	Zimbabwe	Australia	5_wickets	Kapstadt	1	11	5	spin	49.569	79.7736	22.1593	0	812.299	301.097
4	group stage	Zimbabwe	Australia	5_wickets	Kapstadt	1	11	6	spin	52.358	84.262	23.4061	0	769.03	257.827
4	group stage	Zimbabwe	Australia	5_wickets	Kapstadt	1	12	1	pace	80.248	129.147	35.8741	0	501.755	9.44713
4	group stage	Zimbabwe	Australia	5_wickets	Kapstadt	1	12	2	pace	74.764	120.321	33.4225	0	538.559	27.357
4	group stage	Zimbabwe	Australia	5_wickets	Kapstadt	1	12	3	pace	76.862	123.697	34.3604	0	523.859	12.6567
4	group stage	Zimbabwe	Australia	5_wickets	Kapstadt	1	12	4	pace	65.464	105.354	29.265	0	615.069	103.866
4	group stage	Zimbabwe	Australia	5_wickets	Kapstadt	1	12	5	pace	75.572	121.621	33.7837	0	532.801	21.5989
4	group stage	Zimbabwe	Australia	5_wickets	Kapstadt	1	12	6	pace	75.627	121.71	33.8083	0	532.414	21.2114
4	group stage	Zimbabwe	Australia	5_wickets	Kapstadt	1	13	1	pace	76.643	123.345	34.2625	0	525.356	14.1536
4	group stage	Zimbabwe	Australia	5_wickets	Kapstadt	1	13	2	pace	74.845	120.451	33.4587	0	537.977	26.7742
4	group stage	Zimbabwe	Australia	5_wickets	Kapstadt	1	13	3	pace	73.696	118.602	32.9451	0	546.364	35.1618
4	group stage	Zimbabwe	Australia	5_wickets	Kapstadt	1	13	4	pace	76.588	123.256	34.2379	0	525.733	14.5308
4	group stage	Zimbabwe	Australia	5_wickets	Kapstadt	1	13	5	pace	75.78	121.956	33.8767	0	531.339	20.1364
4	group stage	Zimbabwe	Australia	5_wickets	Kapstadt	1	13	6	pace	73.882	118.902	33.0282	0	544.989	33.7863
4	group stage	Zimbabwe	Australia	5_wickets	Kapstadt	1	14	1	pace	65.959	106.151	29.4863	0	610.453	99.2504
4	group stage	Zimbabwe	Australia	5_wickets	Kapstadt	1	14	2	pace	60.409	97.2189	27.0052	0	666.537	155.335
4	group stage	Zimbabwe	Australia	5_wickets	Kapstadt	1	14	4	pace	70.041	112.72	31.3111	0	574.875	63.6731
4	group stage	Zimbabwe	Australia	5_wickets	Kapstadt	1	14	6	pace	66.943	107.734	29.9262	0	601.48	90.2773
4	group stage	Zimbabwe	Australia	5_wickets	Kapstadt	1	15	1	spin	48.299	77.7297	21.5916	0	833.658	322.456
4	group stage	Zimbabwe	Australia	5_wickets	Kapstadt	1	16	4	pace	74.062	119.191	33.1087	0	543.664	32.4618
4	group stage	Zimbabwe	Australia	5_wickets	Kapstadt	1	17	1	spin	55.419	89.1882	24.7745	0	726.553	215.351
4	group stage	Zimbabwe	Australia	5_wickets	Kapstadt	1	17	2	spin	51.971	83.6392	23.2331	0	774.756	263.554
4	group stage	Zimbabwe	Australia	5_wickets	Kapstadt	1	17	3	spin	55.294	88.9871	24.7186	0	728.196	216.993
4	group stage	Zimbabwe	Australia	5_wickets	Kapstadt	1	17	4	spin	50.971	82.0299	22.7861	0	789.956	278.754
4	group stage	Zimbabwe	Australia	5_wickets	Kapstadt	1	17	5	spin	49.471	79.6159	22.1155	0	813.908	302.706
4	group stage	Zimbabwe	Australia	5_wickets	Kapstadt	1	17	6	spin	54.519	87.7398	24.3722	0	738.547	227.345
4	group stage	Zimbabwe	Australia	5_wickets	Kapstadt	1	18	1	pace	73.558	118.38	32.8834	0	547.389	36.1868
4	group stage	Zimbabwe	Australia	5_wickets	Kapstadt	1	18	2	pace	72.043	115.942	32.2061	0	558.9	47.6979
4	group stage	Zimbabwe	Australia	5_wickets	Kapstadt	1	18	3	pace	70.297	113.132	31.4256	0	572.782	61.5796
4	group stage	Zimbabwe	Australia	5_wickets	Kapstadt	1	18	4	pace	70.841	114.008	31.6688	0	568.383	57.1811
4	group stage	Zimbabwe	Australia	5_wickets	Kapstadt	1	18	5	pace	70.735	113.837	31.6214	0	569.235	58.0329
4	group stage	Zimbabwe	Australia	5_wickets	Kapstadt	1	19	1	pace	73.738	118.67	32.9638	0	546.053	34.8506
4	group stage	Zimbabwe	Australia	5_wickets	Kapstadt	1	19	2	pace	77.014	123.942	34.4283	0	522.825	11.6228
4	group stage	Zimbabwe	Australia	5_wickets	Kapstadt	1	19	3	pace	57.353	92.3007	25.6391	0	702.053	190.851
4	group stage	Zimbabwe	Australia	5_wickets	Kapstadt	1	19	4	pace	75.794	121.979	33.8829	0	531.241	20.0383
4	group stage	Zimbabwe	Australia	5_wickets	Kapstadt	1	19	5	pace	75.54	121.57	33.7694	0	533.027	21.8246
4	group stage	Zimbabwe	Australia	5_wickets	Kapstadt	1	19	6	pace	56.189	90.4274	25.1187	0	716.597	205.394
4	group stage	Zimbabwe	Australia	5_wickets	Kapstadt	1	20	2	pace	79.231	127.51	35.4194	0	508.196	3.00666
4	group stage	Zimbabwe	Australia	5_wickets	Kapstadt	1	20	3	pace	67.252	108.232	30.0643	0	598.716	87.5137
4	group stage	Zimbabwe	Australia	5_wickets	Kapstadt	1	20	5	pace	75.303	121.188	33.6635	0	534.705	23.5022
4	group stage	Zimbabwe	Australia	5_wickets	Kapstadt	2	1	1	pace	84.947	136.709	37.9747	0	474	37.2026
4	group stage	Zimbabwe	Australia	5_wickets	Kapstadt	2	1	2	pace	86.473	139.165	38.6569	0	465.635	45.5674
4	group stage	Zimbabwe	Australia	5_wickets	Kapstadt	2	1	3	pace	89.268	143.663	39.9064	0	451.056	60.1465
4	group stage	Zimbabwe	Australia	5_wickets	Kapstadt	2	1	4	pace	86.907	139.863	38.8509	0	463.31	47.8927
4	group stage	Zimbabwe	Australia	5_wickets	Kapstadt	2	1	5	pace	86.277	138.849	38.5693	0	466.693	44.5096
4	group stage	Zimbabwe	Australia	5_wickets	Kapstadt	2	1	6	pace	88.182	141.915	39.4209	0	456.611	54.5916
4	group stage	Zimbabwe	Australia	5_wickets	Kapstadt	2	1	7	pace	87.864	141.403	39.2787	0	458.263	52.939
4	group stage	Zimbabwe	Australia	5_wickets	Kapstadt	2	1	8	pace	86.737	139.59	38.7749	0	464.218	46.9846
4	group stage	Zimbabwe	Australia	5_wickets	Kapstadt	2	2	1	pace	76.345	122.865	34.1293	0	527.407	16.2042
4	group stage	Zimbabwe	Australia	5_wickets	Kapstadt	2	2	2	pace	78.369	126.123	35.0341	0	513.785	2.58311
4	group stage	Zimbabwe	Australia	5_wickets	Kapstadt	2	2	3	pace	80.551	129.634	36.0095	0	499.868	11.3345
4	group stage	Zimbabwe	Australia	5_wickets	Kapstadt	2	2	4	pace	81.343	130.909	36.3636	0	495.001	16.2015
4	group stage	Zimbabwe	Australia	5_wickets	Kapstadt	2	2	5	pace	78.741	126.721	35.2004	0	511.358	0.155813
4	group stage	Zimbabwe	Australia	5_wickets	Kapstadt	2	2	6	pace	80.077	128.871	35.7976	0	502.827	8.37566
4	group stage	Zimbabwe	Australia	5_wickets	Kapstadt	2	3	1	pace	86.789	139.673	38.7982	0	463.94	47.2628
4	group stage	Zimbabwe	Australia	5_wickets	Kapstadt	2	3	2	pace	87.653	141.064	39.1844	0	459.367	51.8358
4	group stage	Zimbabwe	Australia	5_wickets	Kapstadt	2	3	3	pace	89.093	143.381	39.8281	0	451.942	59.2605
4	group stage	Zimbabwe	Australia	5_wickets	Kapstadt	2	3	4	pace	88.547	142.503	39.5841	0	454.729	56.4738
4	group stage	Zimbabwe	Australia	5_wickets	Kapstadt	2	3	5	pace	88.283	142.078	39.466	0	456.088	55.1139
4	group stage	Zimbabwe	Australia	5_wickets	Kapstadt	2	3	6	pace	89.321	143.748	39.9301	0	450.788	60.4141
4	group stage	Zimbabwe	Australia	5_wickets	Kapstadt	2	4	1	pace	81.766	131.59	36.5527	0	492.44	18.7623
4	group stage	Zimbabwe	Australia	5_wickets	Kapstadt	2	4	2	pace	83.997	135.18	37.55	0	479.361	31.8417
4	group stage	Zimbabwe	Australia	5_wickets	Kapstadt	2	4	3	pace	82.451	132.692	36.8589	0	488.349	22.8535
4	group stage	Zimbabwe	Australia	5_wickets	Kapstadt	2	4	4	pace	80.399	129.39	35.9416	0	500.813	10.3895
4	group stage	Zimbabwe	Australia	5_wickets	Kapstadt	2	4	5	pace	84.366	135.774	37.715	0	477.264	33.9384
4	group stage	Zimbabwe	Australia	5_wickets	Kapstadt	2	4	6	pace	82.563	132.872	36.909	0	487.686	23.5159
4	group stage	Zimbabwe	Australia	5_wickets	Kapstadt	2	5	1	pace	76.628	123.321	34.2558	0	525.459	14.2564
4	group stage	Zimbabwe	Australia	5_wickets	Kapstadt	2	5	2	pace	79.044	127.209	35.3358	0	509.398	1.80438
4	group stage	Zimbabwe	Australia	5_wickets	Kapstadt	2	5	3	pace	78.72	126.688	35.191	0	511.495	0.292227
4	group stage	Zimbabwe	Australia	5_wickets	Kapstadt	2	5	4	pace	78.702	126.659	35.1829	0	511.612	0.409211
4	group stage	Zimbabwe	Australia	5_wickets	Kapstadt	2	5	5	pace	80.558	129.646	36.0126	0	499.824	11.378
4	group stage	Zimbabwe	Australia	5_wickets	Kapstadt	2	5	6	pace	78.755	126.744	35.2066	0	511.267	0.0649105
4	group stage	Zimbabwe	Australia	5_wickets	Kapstadt	2	6	1	pace	82.815	133.278	37.0216	0	486.202	24.9999
4	group stage	Zimbabwe	Australia	5_wickets	Kapstadt	2	6	2	pace	84.528	136.035	37.7874	0	476.349	34.8531
4	group stage	Zimbabwe	Australia	5_wickets	Kapstadt	2	6	3	pace	88.751	142.831	39.6752	0	453.683	57.519
4	group stage	Zimbabwe	Australia	5_wickets	Kapstadt	2	6	4	pace	88.948	143.148	39.7633	0	452.679	58.5238
4	group stage	Zimbabwe	Australia	5_wickets	Kapstadt	2	6	5	pace	84.114	135.368	37.6023	0	478.694	32.5085
4	group stage	Zimbabwe	Australia	5_wickets	Kapstadt	2	6	6	pace	87.087	140.153	38.9314	0	462.352	48.8503
4	group stage	Zimbabwe	Australia	5_wickets	Kapstadt	2	7	1	pace	78.339	126.074	35.0207	0	513.982	2.77987
4	group stage	Zimbabwe	Australia	5_wickets	Kapstadt	2	7	2	pace	76.446	123.028	34.1744	0	526.71	15.5074
4	group stage	Zimbabwe	Australia	5_wickets	Kapstadt	2	7	3	pace	80.084	128.883	35.8008	0	502.783	8.41961
4	group stage	Zimbabwe	Australia	5_wickets	Kapstadt	2	7	4	pace	81.704	131.49	36.525	0	492.814	18.3886
4	group stage	Zimbabwe	Australia	5_wickets	Kapstadt	2	7	5	pace	80.003	128.752	35.7645	0	503.292	7.91056
4	group stage	Zimbabwe	Australia	5_wickets	Kapstadt	2	7	6	pace	74.567	120.004	33.3344	0	539.982	28.7799
4	group stage	Zimbabwe	Australia	5_wickets	Kapstadt	2	8	1	pace	86.443	139.117	38.6435	0	465.797	45.4058
4	group stage	Zimbabwe	Australia	5_wickets	Kapstadt	2	8	2	pace	90.426	145.527	40.424	0	445.28	65.9228
4	group stage	Zimbabwe	Australia	5_wickets	Kapstadt	2	8	3	pace	84.698	136.308	37.8634	0	475.393	35.8092
4	group stage	Zimbabwe	Australia	5_wickets	Kapstadt	2	8	4	pace	85.395	137.43	38.175	0	471.513	39.6893
4	group stage	Zimbabwe	Australia	5_wickets	Kapstadt	2	8	5	pace	88.686	142.726	39.6462	0	454.016	57.1865
4	group stage	Zimbabwe	Australia	5_wickets	Kapstadt	2	8	6	pace	86.929	139.899	38.8607	0	463.192	48.0099
4	group stage	Zimbabwe	Australia	5_wickets	Kapstadt	2	8	7	pace	87.614	141.001	39.167	0	459.571	51.6314
4	group stage	Zimbabwe	Australia	5_wickets	Kapstadt	2	9	1	pace	75.736	121.885	33.857	0	531.647	20.4451
4	group stage	Zimbabwe	Australia	5_wickets	Kapstadt	2	9	2	pace	81.177	130.642	36.2894	0	496.013	15.1893
4	group stage	Zimbabwe	Australia	5_wickets	Kapstadt	2	9	3	pace	80.836	130.093	36.1369	0	498.105	13.0969
4	group stage	Zimbabwe	Australia	5_wickets	Kapstadt	2	9	4	pace	80.038	128.809	35.7802	0	503.072	8.13065
4	group stage	Zimbabwe	Australia	5_wickets	Kapstadt	2	9	5	pace	78.297	126.007	35.0019	0	514.258	3.05558
4	group stage	Zimbabwe	Australia	5_wickets	Kapstadt	2	9	6	pace	79.951	128.669	35.7413	0	503.619	7.58322
4	group stage	Zimbabwe	Australia	5_wickets	Kapstadt	2	10	1	pace	86.423	139.084	38.6345	0	465.904	45.298
4	group stage	Zimbabwe	Australia	5_wickets	Kapstadt	2	10	2	pace	92.488	148.845	41.3458	0	435.352	75.8502
4	group stage	Zimbabwe	Australia	5_wickets	Kapstadt	2	10	3	pace	83.988	135.166	37.546	0	479.412	31.7904
4	group stage	Zimbabwe	Australia	5_wickets	Kapstadt	2	10	4	pace	88.689	142.731	39.6475	0	454.001	57.2018
4	group stage	Zimbabwe	Australia	5_wickets	Kapstadt	2	10	5	pace	90.034	144.896	40.2488	0	447.218	63.984
4	group stage	Zimbabwe	Australia	5_wickets	Kapstadt	2	10	6	pace	87.94	141.526	39.3127	0	457.867	53.335
4	group stage	Zimbabwe	Australia	5_wickets	Kapstadt	2	11	1	pace	79.166	127.405	35.3904	0	508.613	2.5894
4	group stage	Zimbabwe	Australia	5_wickets	Kapstadt	2	11	2	pace	80.004	128.754	35.765	0	503.286	7.91685
4	group stage	Zimbabwe	Australia	5_wickets	Kapstadt	2	11	3	pace	72.924	117.36	32.5999	0	552.148	40.9458
4	group stage	Zimbabwe	Australia	5_wickets	Kapstadt	2	11	4	pace	73.03	117.53	32.6473	0	551.347	40.1444
4	group stage	Zimbabwe	Australia	5_wickets	Kapstadt	2	11	5	pace	80.813	130.056	36.1266	0	498.247	12.9551
4	group stage	Zimbabwe	Australia	5_wickets	Kapstadt	2	11	6	pace	79.895	128.579	35.7163	0	503.972	7.23022
4	group stage	Zimbabwe	Australia	5_wickets	Kapstadt	2	12	1	pace/spin	72.77	117.112	32.5311	0	553.317	42.1143
4	group stage	Zimbabwe	Australia	5_wickets	Kapstadt	2	12	2	pace/spin	73.348	118.042	32.7895	0	548.956	37.754
4	group stage	Zimbabwe	Australia	5_wickets	Kapstadt	2	12	3	pace/spin	70.139	112.878	31.3549	0	574.072	62.8699
4	group stage	Zimbabwe	Australia	5_wickets	Kapstadt	2	12	4	pace/spin	73.144	117.714	32.6983	0	550.487	39.2851
4	group stage	Zimbabwe	Australia	5_wickets	Kapstadt	2	12	5	pace/spin	71.997	115.868	32.1855	0	559.257	48.055
4	group stage	Zimbabwe	Australia	5_wickets	Kapstadt	2	12	6	pace/spin	71.856	115.641	32.1225	0	560.355	49.1524
4	group stage	Zimbabwe	Australia	5_wickets	Kapstadt	2	13	2	spin	51.564	82.9842	23.0512	0	780.871	269.669
4	group stage	Zimbabwe	Australia	5_wickets	Kapstadt	2	13	4	spin	52.614	84.674	23.5206	0	765.288	254.085
4	group stage	Zimbabwe	Australia	5_wickets	Kapstadt	2	13	5	spin	53.405	85.947	23.8742	0	753.953	242.751
4	group stage	Zimbabwe	Australia	5_wickets	Kapstadt	2	13	6	spin	56.944	91.6425	25.4562	0	707.096	195.893
4	group stage	Zimbabwe	Australia	5_wickets	Kapstadt	2	14	1	pace/spin	73.275	117.925	32.7569	0	549.503	38.3009
4	group stage	Zimbabwe	Australia	5_wickets	Kapstadt	2	14	2	pace/spin	71.107	114.436	31.7877	0	566.257	55.0549
4	group stage	Zimbabwe	Australia	5_wickets	Kapstadt	2	14	3	pace/spin	69.884	112.467	31.2409	0	576.167	64.9646
4	group stage	Zimbabwe	Australia	5_wickets	Kapstadt	2	14	4	pace/spin	71.148	114.502	31.806	0	565.931	54.7286
4	group stage	Zimbabwe	Australia	5_wickets	Kapstadt	2	14	5	pace/spin	71.821	115.585	32.1069	0	560.628	49.4255
4	group stage	Zimbabwe	Australia	5_wickets	Kapstadt	2	14	6	pace/spin	71.604	115.235	32.0099	0	562.327	51.1245
4	group stage	Zimbabwe	Australia	5_wickets	Kapstadt	2	15	1	spin	53.153	85.5415	23.7615	0	757.527	246.325
4	group stage	Zimbabwe	Australia	5_wickets	Kapstadt	2	15	2	spin	53.79	86.5666	24.0463	0	748.556	237.354
4	group stage	Zimbabwe	Australia	5_wickets	Kapstadt	2	15	4	spin	58.584	94.2818	26.1894	0	687.301	176.099
4	group stage	Zimbabwe	Australia	5_wickets	Kapstadt	2	15	5	spin	50.111	80.6458	22.4016	0	803.513	292.311
4	group stage	Zimbabwe	Australia	5_wickets	Kapstadt	2	15	6	spin	55.334	89.0514	24.7365	0	727.669	216.467
4	group stage	Zimbabwe	Australia	5_wickets	Kapstadt	2	16	1	pace	84.617	136.178	37.8272	0	475.848	35.3541
4	group stage	Zimbabwe	Australia	5_wickets	Kapstadt	2	16	2	pace	84.822	136.508	37.9188	0	474.698	36.5041
4	group stage	Zimbabwe	Australia	5_wickets	Kapstadt	2	16	3	pace	85.194	137.106	38.0851	0	472.625	38.5769
4	group stage	Zimbabwe	Australia	5_wickets	Kapstadt	2	16	4	pace	88.068	141.732	39.3699	0	457.202	54.0005
4	group stage	Zimbabwe	Australia	5_wickets	Kapstadt	2	16	5	pace	86.498	139.205	38.6681	0	465.5	45.702
4	group stage	Zimbabwe	Australia	5_wickets	Kapstadt	2	16	6	pace	90.133	145.055	40.2931	0	446.727	64.4753
4	group stage	Zimbabwe	Australia	5_wickets	Kapstadt	2	17	1	pace	84.228	135.552	37.6533	0	478.046	33.1564
4	group stage	Zimbabwe	Australia	5_wickets	Kapstadt	2	17	2	pace	85.125	136.995	38.0543	0	473.009	38.1938
4	group stage	Zimbabwe	Australia	5_wickets	Kapstadt	2	17	3	pace	87.987	141.601	39.3337	0	457.623	53.5796
4	group stage	Zimbabwe	Australia	5_wickets	Kapstadt	2	17	4	pace	89.327	143.758	39.9327	0	450.758	60.4444
4	group stage	Zimbabwe	Australia	5_wickets	Kapstadt	2	17	5	pace	85.524	137.638	38.2326	0	470.802	40.4006
4	group stage	Zimbabwe	Australia	5_wickets	Kapstadt	2	17	6	pace	86.346	138.96	38.6001	0	466.32	44.8825
4	group stage	Zimbabwe	Australia	5_wickets	Kapstadt	2	18	1	pace	75.932	122.201	33.9446	0	530.275	19.0728
4	group stage	Zimbabwe	Australia	5_wickets	Kapstadt	2	18	2	pace	73.401	118.127	32.8132	0	548.56	37.3577
4	group stage	Zimbabwe	Australia	5_wickets	Kapstadt	2	18	3	pace	73.564	118.39	32.8861	0	547.345	36.1422
4	group stage	Zimbabwe	Australia	5_wickets	Kapstadt	2	18	4	pace	73.725	118.649	32.958	0	546.149	34.9469
4	group stage	Zimbabwe	Australia	5_wickets	Kapstadt	2	18	5	pace	72.043	115.942	32.2061	0	558.9	47.6979
4	group stage	Zimbabwe	Australia	5_wickets	Kapstadt	2	18	6	pace	74.188	119.394	33.165	0	542.741	31.5384
4	group stage	Zimbabwe	Australia	5_wickets	Kapstadt	2	19	1	pace	86.41	139.063	38.6287	0	465.974	45.2279
4	group stage	Zimbabwe	Australia	5_wickets	Kapstadt	2	19	2	pace	87.213	140.356	38.9877	0	461.684	49.5183
4	group stage	Zimbabwe	Australia	5_wickets	Kapstadt	2	19	3	pace	86.248	138.803	38.5563	0	466.85	44.3526
4	group stage	Zimbabwe	Australia	5_wickets	Kapstadt	2	19	4	pace	87.106	140.184	38.9399	0	462.251	48.9511
4	group stage	Zimbabwe	Australia	5_wickets	Kapstadt	2	19	5	pace	87.249	140.414	39.0038	0	461.494	49.7088
4	group stage	Zimbabwe	Australia	5_wickets	Kapstadt	2	19	6	pace	86.768	139.64	38.7888	0	464.052	47.1505
4	group stage	Zimbabwe	Australia	5_wickets	Kapstadt	2	20	1	pace	75.082	120.833	33.5647	0	536.278	25.076
4	group stage	Zimbabwe	Australia	5_wickets	Kapstadt	2	20	2	pace	75.529	121.552	33.7645	0	533.105	21.9022
4	group stage	Zimbabwe	Australia	5_wickets	Kapstadt	2	20	3	pace	75.009	120.715	33.532	0	536.8	25.5979
4	group stage	Zimbabwe	Australia	5_wickets	Kapstadt	2	20	4	pace	79.686	128.242	35.6228	0	505.294	5.90841
4	group stage	Zimbabwe	Australia	5_wickets	Kapstadt	2	20	5	pace	77.585	124.861	34.6836	0	518.977	7.77494
5	group stage	Bangladesh	WestIndies	6_wickets	Johannesburg	2	1	1	pace	86.919	139.883	38.8563	0	463.246	47.9566
5	group stage	Bangladesh	WestIndies	6_wickets	Johannesburg	2	1	2	pace	86.462	139.147	38.652	0	465.694	45.5081
5	group stage	Bangladesh	WestIndies	6_wickets	Johannesburg	2	1	3	pace	87.098	140.171	38.9363	0	462.294	48.9087
5	group stage	Bangladesh	WestIndies	6_wickets	Johannesburg	2	1	4	pace	87.502	140.821	39.1169	0	460.159	51.0431
5	group stage	Bangladesh	WestIndies	6_wickets	Johannesburg	2	1	5	pace	89.013	143.253	39.7924	0	452.348	58.8543
5	group stage	Bangladesh	WestIndies	6_wickets	Johannesburg	2	1	6	pace	86.889	139.834	38.8429	0	463.406	47.7967
5	group stage	Bangladesh	WestIndies	6_wickets	Johannesburg	2	2	1	pace	82.602	132.935	36.9264	0	487.456	23.7462
5	group stage	Bangladesh	WestIndies	6_wickets	Johannesburg	2	2	2	pace	83.767	134.81	37.4472	0	480.677	30.5256
5	group stage	Bangladesh	WestIndies	6_wickets	Johannesburg	2	2	3	pace	84.585	136.126	37.8129	0	476.028	35.1741
5	group stage	Bangladesh	WestIndies	6_wickets	Johannesburg	2	2	4	pace	84.213	135.528	37.6466	0	478.131	33.0713
5	group stage	Bangladesh	WestIndies	6_wickets	Johannesburg	2	2	5	pace	83.773	134.82	37.4499	0	480.642	30.56
5	group stage	Bangladesh	WestIndies	6_wickets	Johannesburg	2	2	6	pace	83.812	134.882	37.4673	0	480.419	30.7836
5	group stage	Bangladesh	WestIndies	6_wickets	Johannesburg	2	2	7	pace	85.363	137.378	38.1607	0	471.69	39.5126
5	group stage	Bangladesh	WestIndies	6_wickets	Johannesburg	2	3	1	pace	88.059	141.717	39.3659	0	457.249	53.9538
5	group stage	Bangladesh	WestIndies	6_wickets	Johannesburg	2	3	2	pace	86.487	139.187	38.6631	0	465.56	45.6428
5	group stage	Bangladesh	WestIndies	6_wickets	Johannesburg	2	3	3	pace	87.751	141.222	39.2282	0	458.853	52.3489
5	group stage	Bangladesh	WestIndies	6_wickets	Johannesburg	2	3	4	pace	89.53	144.085	40.0235	0	449.736	61.4665
5	group stage	Bangladesh	WestIndies	6_wickets	Johannesburg	2	3	5	pace	89.412	143.895	39.9707	0	450.329	60.8729
5	group stage	Bangladesh	WestIndies	6_wickets	Johannesburg	2	3	6	pace	88.317	142.132	39.4812	0	455.913	55.2895
5	group stage	Bangladesh	WestIndies	6_wickets	Johannesburg	2	4	1	pace	86.148	138.642	38.5116	0	467.392	43.8107
5	group stage	Bangladesh	WestIndies	6_wickets	Johannesburg	2	4	2	pace	85.527	137.642	38.234	0	470.785	40.4171
5	group stage	Bangladesh	WestIndies	6_wickets	Johannesburg	2	4	3	pace	85.166	137.061	38.0726	0	472.781	38.4215
5	group stage	Bangladesh	WestIndies	6_wickets	Johannesburg	2	4	4	pace	84.926	136.675	37.9653	0	474.117	37.0854
5	group stage	Bangladesh	WestIndies	6_wickets	Johannesburg	2	4	5	pace	86.048	138.481	38.4669	0	467.935	43.2676
5	group stage	Bangladesh	WestIndies	6_wickets	Johannesburg	2	4	6	pace	85.752	138.004	38.3346	0	469.55	41.6523
5	group stage	Bangladesh	WestIndies	6_wickets	Johannesburg	2	4	7	pace	63.597	102.349	28.4304	0	633.125	121.923
5	group stage	Bangladesh	WestIndies	6_wickets	Johannesburg	2	5	1	pace	87.355	140.584	39.0512	0	460.934	50.2688
5	group stage	Bangladesh	WestIndies	6_wickets	Johannesburg	2	5	2	pace	88.056	141.712	39.3646	0	457.264	53.9382
5	group stage	Bangladesh	WestIndies	6_wickets	Johannesburg	2	5	3	pace	86.878	139.817	38.8379	0	463.464	47.738
5	group stage	Bangladesh	WestIndies	6_wickets	Johannesburg	2	5	4	pace	88.515	142.451	39.5697	0	454.893	56.3094
5	group stage	Bangladesh	WestIndies	6_wickets	Johannesburg	2	5	5	pace	86.761	139.628	38.7856	0	464.089	47.113
5	group stage	Bangladesh	WestIndies	6_wickets	Johannesburg	2	5	6	pace	85.876	138.204	38.39	0	468.872	42.3303
5	group stage	Bangladesh	WestIndies	6_wickets	Johannesburg	2	6	1	pace	86.142	138.632	38.5089	0	467.424	43.7782
5	group stage	Bangladesh	WestIndies	6_wickets	Johannesburg	2	6	2	pace	86.824	139.73	38.8138	0	463.753	47.4498
5	group stage	Bangladesh	WestIndies	6_wickets	Johannesburg	2	6	3	pace	85.54	137.663	38.2398	0	470.714	40.4886
5	group stage	Bangladesh	WestIndies	6_wickets	Johannesburg	2	6	4	pace	77.207	124.253	34.5146	0	521.518	10.3158
5	group stage	Bangladesh	WestIndies	6_wickets	Johannesburg	2	6	5	pace	74.253	119.499	33.1941	0	542.266	31.0633
5	group stage	Bangladesh	WestIndies	6_wickets	Johannesburg	2	6	6	pace	72.405	116.525	32.3679	0	556.106	44.9036
5	group stage	Bangladesh	WestIndies	6_wickets	Johannesburg	2	7	1	spin	60.386	97.1818	26.995	0	666.791	155.589
5	group stage	Bangladesh	WestIndies	6_wickets	Johannesburg	2	7	2	spin	59.907	96.411	26.7808	0	672.123	160.92
5	group stage	Bangladesh	WestIndies	6_wickets	Johannesburg	2	7	3	spin	59.355	95.5226	26.5341	0	678.373	167.171
5	group stage	Bangladesh	WestIndies	6_wickets	Johannesburg	2	7	4	spin	53.842	86.6503	24.0695	0	747.834	236.631
5	group stage	Bangladesh	WestIndies	6_wickets	Johannesburg	2	7	5	spin	60.824	97.8867	27.1908	0	661.99	150.787
5	group stage	Bangladesh	WestIndies	6_wickets	Johannesburg	2	7	6	spin	61.694	99.2869	27.5797	0	652.654	141.452
5	group stage	Bangladesh	WestIndies	6_wickets	Johannesburg	2	8	1	pace	89.642	144.265	40.0736	0	449.174	62.0284
5	group stage	Bangladesh	WestIndies	6_wickets	Johannesburg	2	8	2	pace	90.443	145.554	40.4316	0	445.196	66.0064
5	group stage	Bangladesh	WestIndies	6_wickets	Johannesburg	2	8	3	pace	91.108	146.624	40.7289	0	441.946	69.2559
5	group stage	Bangladesh	WestIndies	6_wickets	Johannesburg	2	8	4	pace	92.364	148.645	41.2904	0	435.937	75.2657
5	group stage	Bangladesh	WestIndies	6_wickets	Johannesburg	2	8	5	pace	90.703	145.972	40.5479	0	443.92	67.2826
5	group stage	Bangladesh	WestIndies	6_wickets	Johannesburg	2	8	6	pace	79.766	128.371	35.6586	0	504.787	6.41518
5	group stage	Bangladesh	WestIndies	6_wickets	Johannesburg	2	9	1	spin	53.856	86.6728	24.0758	0	747.639	236.437
5	group stage	Bangladesh	WestIndies	6_wickets	Johannesburg	2	9	2	spin	61.374	98.7719	27.4366	0	656.057	144.855
5	group stage	Bangladesh	WestIndies	6_wickets	Johannesburg	2	9	3	spin	56.198	90.4419	25.1228	0	716.482	205.28
5	group stage	Bangladesh	WestIndies	6_wickets	Johannesburg	2	9	4	spin	63.524	102.232	28.3978	0	633.853	122.65
5	group stage	Bangladesh	WestIndies	6_wickets	Johannesburg	2	9	6	spin	57.866	93.1263	25.8684	0	695.829	184.627
5	group stage	Bangladesh	WestIndies	6_wickets	Johannesburg	2	10	1	pace	79.266	127.566	35.4351	0	507.971	3.23105
5	group stage	Bangladesh	WestIndies	6_wickets	Johannesburg	2	10	2	pace	61.315	98.6769	27.4103	0	656.688	145.486
5	group stage	Bangladesh	WestIndies	6_wickets	Johannesburg	2	10	3	pace	79.143	127.368	35.3801	0	508.761	2.44159
5	group stage	Bangladesh	WestIndies	6_wickets	Johannesburg	2	10	4	pace	62.229	100.148	27.8189	0	647.043	135.841
5	group stage	Bangladesh	WestIndies	6_wickets	Johannesburg	2	10	5	pace	82.96	133.511	37.0864	0	485.353	25.8497
5	group stage	Bangladesh	WestIndies	6_wickets	Johannesburg	2	10	6	pace	62.884	101.202	28.1117	0	640.304	129.101
5	group stage	Bangladesh	WestIndies	6_wickets	Johannesburg	2	10	7	pace	81.526	131.203	36.4454	0	493.89	17.3126
5	group stage	Bangladesh	WestIndies	6_wickets	Johannesburg	2	11	1	spin	62.127	99.9837	27.7733	0	648.106	136.903
5	group stage	Bangladesh	WestIndies	6_wickets	Johannesburg	2	11	2	spin	56.913	91.5926	25.4424	0	707.481	196.278
5	group stage	Bangladesh	WestIndies	6_wickets	Johannesburg	2	11	3	spin	57.844	93.0909	25.8586	0	696.094	184.892
5	group stage	Bangladesh	WestIndies	6_wickets	Johannesburg	2	11	4	spin	57.965	93.2856	25.9127	0	694.641	183.438
5	group stage	Bangladesh	WestIndies	6_wickets	Johannesburg	2	11	5	spin	58.218	93.6928	26.0258	0	691.622	180.42
5	group stage	Bangladesh	WestIndies	6_wickets	Johannesburg	2	11	6	spin	53.766	86.528	24.0356	0	748.891	237.688
5	group stage	Bangladesh	WestIndies	6_wickets	Johannesburg	2	12	1	pace	89.983	144.814	40.226	0	447.472	63.7306
5	group stage	Bangladesh	WestIndies	6_wickets	Johannesburg	2	12	2	pace	88.608	142.601	39.6113	0	454.416	56.7868
5	group stage	Bangladesh	WestIndies	6_wickets	Johannesburg	2	12	3	pace	90.964	146.392	40.6645	0	442.646	68.5563
5	group stage	Bangladesh	WestIndies	6_wickets	Johannesburg	2	12	4	pace	92.07	148.172	41.159	0	437.329	73.8737
5	group stage	Bangladesh	WestIndies	6_wickets	Johannesburg	2	12	5	pace	92.317	148.57	41.2694	0	436.159	75.0438
5	group stage	Bangladesh	WestIndies	6_wickets	Johannesburg	2	12	6	pace	83.596	134.535	37.3708	0	481.66	29.5423
5	group stage	Bangladesh	WestIndies	6_wickets	Johannesburg	2	12	7	pace	90.253	145.248	40.3467	0	446.133	65.0692
5	group stage	Bangladesh	WestIndies	6_wickets	Johannesburg	2	13	1	spin	56.405	90.775	25.2153	0	713.853	202.65
5	group stage	Bangladesh	WestIndies	6_wickets	Johannesburg	2	13	2	spin	57.835	93.0764	25.8546	0	696.202	185
5	group stage	Bangladesh	WestIndies	6_wickets	Johannesburg	2	13	3	spin	61.084	98.3052	27.307	0	659.172	147.969
5	group stage	Bangladesh	WestIndies	6_wickets	Johannesburg	2	13	4	spin	58.562	94.2464	26.1796	0	687.559	176.357
5	group stage	Bangladesh	WestIndies	6_wickets	Johannesburg	2	13	5	spin	58.939	94.8531	26.3481	0	683.161	171.959
5	group stage	Bangladesh	WestIndies	6_wickets	Johannesburg	2	13	6	spin	62.663	100.846	28.0129	0	642.562	131.359
5	group stage	Bangladesh	WestIndies	6_wickets	Johannesburg	2	14	1	pace	92.178	148.346	41.2073	0	436.816	74.386
5	group stage	Bangladesh	WestIndies	6_wickets	Johannesburg	2	14	2	pace	90.188	145.144	40.3176	0	446.455	64.7477
5	group stage	Bangladesh	WestIndies	6_wickets	Johannesburg	2	14	3	pace	89.439	143.938	39.9828	0	450.193	61.0089
5	group stage	Bangladesh	WestIndies	6_wickets	Johannesburg	2	14	4	pace	79.066	127.244	35.3457	0	509.256	1.94612
5	group stage	Bangladesh	WestIndies	6_wickets	Johannesburg	2	14	5	pace	90.626	145.848	40.5134	0	444.297	66.9054
5	group stage	Bangladesh	WestIndies	6_wickets	Johannesburg	2	14	6	pace	73.925	118.971	33.0474	0	544.672	33.4693
5	group stage	Bangladesh	WestIndies	6_wickets	Johannesburg	2	14	7	pace	89.11	143.409	39.8357	0	451.856	59.3467
5	group stage	Bangladesh	WestIndies	6_wickets	Johannesburg	2	15	1	spin	64.453	103.727	28.8131	0	624.717	113.514
5	group stage	Bangladesh	WestIndies	6_wickets	Johannesburg	2	15	2	spin	48.724	78.4137	21.7816	0	826.386	315.184
5	group stage	Bangladesh	WestIndies	6_wickets	Johannesburg	2	15	3	spin	50.602	81.436	22.6211	0	795.717	284.514
5	group stage	Bangladesh	WestIndies	6_wickets	Johannesburg	2	15	4	spin	50.099	80.6265	22.3963	0	803.706	292.503
5	group stage	Bangladesh	WestIndies	6_wickets	Johannesburg	2	15	5	spin	49.355	79.4292	22.0637	0	815.821	304.619
5	group stage	Bangladesh	WestIndies	6_wickets	Johannesburg	2	16	1	pace	60.159	96.8165	26.8935	0	669.307	158.105
5	group stage	Bangladesh	WestIndies	6_wickets	Johannesburg	2	16	2	pace	84.27	135.619	37.6721	0	477.808	33.3947
5	group stage	Bangladesh	WestIndies	6_wickets	Johannesburg	2	16	3	pace	66.122	106.413	29.5592	0	608.948	97.7456
5	group stage	Bangladesh	WestIndies	6_wickets	Johannesburg	2	16	4	pace	81.547	131.237	36.4548	0	493.763	17.4398
5	group stage	Bangladesh	WestIndies	6_wickets	Johannesburg	2	16	5	pace	82.709	133.107	36.9742	0	486.826	24.3768
5	group stage	Bangladesh	WestIndies	6_wickets	Johannesburg	2	16	6	pace	81.85	131.725	36.5902	0	491.935	19.2677
5	group stage	Bangladesh	WestIndies	6_wickets	Johannesburg	2	17	1	spin	48.351	77.8134	21.6148	0	832.762	321.559
5	group stage	Bangladesh	WestIndies	6_wickets	Johannesburg	2	17	2	spin	50.379	81.0771	22.5214	0	799.239	288.036
5	group stage	Bangladesh	WestIndies	6_wickets	Johannesburg	2	17	3	spin	65.576	105.534	29.3151	0	614.018	102.816
5	group stage	Bangladesh	WestIndies	6_wickets	Johannesburg	2	17	4	spin	49.019	78.8884	21.9135	0	821.413	310.211
5	group stage	Bangladesh	WestIndies	6_wickets	Johannesburg	2	17	5	spin	50.188	80.7698	22.436	0	802.28	291.078
5	group stage	Bangladesh	WestIndies	6_wickets	Johannesburg	2	17	6	spin	52.525	84.5308	23.4808	0	766.585	255.382
5	group stage	Bangladesh	WestIndies	6_wickets	Johannesburg	2	18	1	pace	80.497	129.547	35.9854	0	500.203	10.9992
5	group stage	Bangladesh	WestIndies	6_wickets	Johannesburg	2	18	2	pace	82.889	133.397	37.0547	0	485.768	25.434
5	group stage	Bangladesh	WestIndies	6_wickets	Johannesburg	2	18	3	pace	81.06	130.453	36.2371	0	496.729	14.4733
5	group stage	Bangladesh	WestIndies	6_wickets	Johannesburg	2	18	4	pace	72.955	117.41	32.6138	0	551.914	40.7112
5	group stage	Bangladesh	WestIndies	6_wickets	Johannesburg	2	18	5	pace	82.663	133.033	36.9537	0	487.096	24.1059
5	group stage	Bangladesh	WestIndies	6_wickets	Johannesburg	2	18	6	pace	81.179	130.645	36.2903	0	496.001	15.2015
6	group stage	England	Zimbabwe	50_runs	Kapstadt	1	1	1	pace	78.255	125.939	34.9831	0	514.534	3.33159
6	group stage	England	Zimbabwe	50_runs	Kapstadt	1	2	2	pace	72.707	117.011	32.5029	0	553.796	42.5938
6	group stage	England	Zimbabwe	50_runs	Kapstadt	1	2	3	pace	72.577	116.801	32.4448	0	554.788	43.5857
6	group stage	England	Zimbabwe	50_runs	Kapstadt	1	2	4	pace	73.893	118.919	33.0331	0	544.908	33.7052
6	group stage	England	Zimbabwe	50_runs	Kapstadt	1	2	5	pace	71.491	115.054	31.9593	0	563.216	52.0133
6	group stage	England	Zimbabwe	50_runs	Kapstadt	1	2	6	pace	73.113	117.664	32.6844	0	550.721	39.5185
6	group stage	England	Zimbabwe	50_runs	Kapstadt	1	3	1	pace	79.524	127.981	35.5504	0	506.323	4.87906
6	group stage	England	Zimbabwe	50_runs	Kapstadt	1	3	2	pace	80.566	129.658	36.0162	0	499.775	11.4276
6	group stage	England	Zimbabwe	50_runs	Kapstadt	1	3	3	pace	81.692	131.471	36.5196	0	492.886	18.3162
6	group stage	England	Zimbabwe	50_runs	Kapstadt	1	3	4	pace	81.575	131.282	36.4673	0	493.593	17.6093
6	group stage	England	Zimbabwe	50_runs	Kapstadt	1	3	5	pace	81.722	131.519	36.533	0	492.705	18.4972
6	group stage	England	Zimbabwe	50_runs	Kapstadt	1	3	6	pace	79.609	128.118	35.5884	0	505.783	5.41967
6	group stage	England	Zimbabwe	50_runs	Kapstadt	1	4	1	pace	72.581	116.808	32.4466	0	554.757	43.5551
6	group stage	England	Zimbabwe	50_runs	Kapstadt	1	4	2	pace	73.285	117.941	32.7613	0	549.428	38.226
6	group stage	England	Zimbabwe	50_runs	Kapstadt	1	4	3	pace	73.585	118.424	32.8954	0	547.188	35.986
6	group stage	England	Zimbabwe	50_runs	Kapstadt	1	4	4	pace	75.246	121.097	33.638	0	535.11	23.9072
6	group stage	England	Zimbabwe	50_runs	Kapstadt	1	4	5	pace	75.331	121.233	33.676	0	534.506	23.3034
6	group stage	England	Zimbabwe	50_runs	Kapstadt	1	4	6	pace	74.54	119.961	33.3224	0	540.178	28.9754
6	group stage	England	Zimbabwe	50_runs	Kapstadt	1	5	1	pace	79.313	127.642	35.4561	0	507.67	3.53207
6	group stage	England	Zimbabwe	50_runs	Kapstadt	1	5	2	pace	83.116	133.762	37.1562	0	484.442	26.7607
6	group stage	England	Zimbabwe	50_runs	Kapstadt	1	5	3	pace	66.926	107.707	29.9186	0	601.632	90.4301
6	group stage	England	Zimbabwe	50_runs	Kapstadt	1	5	4	pace	82.321	132.483	36.8008	0	489.12	22.0823
6	group stage	England	Zimbabwe	50_runs	Kapstadt	1	5	5	pace	85.144	137.026	38.0628	0	472.903	38.2993
6	group stage	England	Zimbabwe	50_runs	Kapstadt	1	5	6	pace	68.182	109.728	30.4801	0	590.55	79.3473
6	group stage	England	Zimbabwe	50_runs	Kapstadt	1	5	7	pace	72.972	117.437	32.6214	0	551.785	40.5826
6	group stage	England	Zimbabwe	50_runs	Kapstadt	1	6	2	pace	65.795	105.887	29.413	0	611.974	100.772
6	group stage	England	Zimbabwe	50_runs	Kapstadt	1	6	3	pace	76.838	123.659	34.3497	0	524.023	12.8203
6	group stage	England	Zimbabwe	50_runs	Kapstadt	1	6	5	pace	74.052	119.175	33.1042	0	543.738	32.5352
6	group stage	England	Zimbabwe	50_runs	Kapstadt	1	6	6	pace	76.606	123.285	34.2459	0	525.61	14.4073
6	group stage	England	Zimbabwe	50_runs	Kapstadt	1	7	1	spin	45.825	73.7482	20.4856	0	878.666	367.463
6	group stage	England	Zimbabwe	50_runs	Kapstadt	1	7	2	spin	48.191	77.5559	21.5433	0	835.526	324.324
6	group stage	England	Zimbabwe	50_runs	Kapstadt	1	7	3	spin	48.086	77.3869	21.4964	0	837.351	326.149
6	group stage	England	Zimbabwe	50_runs	Kapstadt	1	7	4	spin	46.961	75.5764	20.9934	0	857.41	346.208
6	group stage	England	Zimbabwe	50_runs	Kapstadt	1	7	5	spin	52.891	85.1198	23.6444	0	761.28	250.078
6	group stage	England	Zimbabwe	50_runs	Kapstadt	1	7	6	spin	52.41	84.3457	23.4294	0	768.267	257.064
6	group stage	England	Zimbabwe	50_runs	Kapstadt	1	8	1	pace	74.358	119.668	33.241	0	541.5	30.2976
6	group stage	England	Zimbabwe	50_runs	Kapstadt	1	8	2	pace	73.585	118.424	32.8954	0	547.188	35.986
6	group stage	England	Zimbabwe	50_runs	Kapstadt	1	8	3	pace	73.241	117.87	32.7417	0	549.758	38.556
6	group stage	England	Zimbabwe	50_runs	Kapstadt	1	8	4	pace	72.446	116.591	32.3863	0	555.791	44.5889
6	group stage	England	Zimbabwe	50_runs	Kapstadt	1	8	5	pace	72.533	116.731	32.4252	0	555.125	43.9223
6	group stage	England	Zimbabwe	50_runs	Kapstadt	1	8	6	pace	70.688	113.761	31.6004	0	569.614	58.4113
6	group stage	England	Zimbabwe	50_runs	Kapstadt	1	9	1	spin	49.09	79.0027	21.9452	0	820.225	309.023
6	group stage	England	Zimbabwe	50_runs	Kapstadt	1	9	2	spin	53.036	85.3532	23.7092	0	759.199	247.996
6	group stage	England	Zimbabwe	50_runs	Kapstadt	1	9	3	spin	46.864	75.4203	20.9501	0	859.185	347.983
6	group stage	England	Zimbabwe	50_runs	Kapstadt	1	9	4	spin	46.767	75.2642	20.9067	0	860.967	349.765
6	group stage	England	Zimbabwe	50_runs	Kapstadt	1	9	5	spin	53.458	86.0323	23.8979	0	753.205	242.003
6	group stage	England	Zimbabwe	50_runs	Kapstadt	1	9	6	spin	54.912	88.3723	24.5479	0	733.261	222.059
6	group stage	England	Zimbabwe	50_runs	Kapstadt	1	10	1	pace	71.212	114.605	31.8346	0	565.422	54.22
6	group stage	England	Zimbabwe	50_runs	Kapstadt	1	10	2	pace	72.126	116.076	32.2432	0	558.257	47.0548
6	group stage	England	Zimbabwe	50_runs	Kapstadt	1	10	3	pace	69.83	112.38	31.2168	0	576.613	65.4102
6	group stage	England	Zimbabwe	50_runs	Kapstadt	1	10	4	pace	70.438	113.359	31.4886	0	571.635	60.433
6	group stage	England	Zimbabwe	50_runs	Kapstadt	1	10	5	pace	70.358	113.23	31.4528	0	572.285	61.083
6	group stage	England	Zimbabwe	50_runs	Kapstadt	1	10	6	pace	68.208	109.77	30.4917	0	590.324	79.1221
6	group stage	England	Zimbabwe	50_runs	Kapstadt	1	11	1	spin	54.832	88.2436	24.5121	0	734.331	223.129
6	group stage	England	Zimbabwe	50_runs	Kapstadt	1	11	3	spin	53.89	86.7275	24.091	0	747.167	235.965
6	group stage	England	Zimbabwe	50_runs	Kapstadt	1	11	4	spin	54.794	88.1824	24.4951	0	734.841	223.638
6	group stage	England	Zimbabwe	50_runs	Kapstadt	1	11	5	spin	54.845	88.2645	24.5179	0	734.157	222.955
6	group stage	England	Zimbabwe	50_runs	Kapstadt	1	11	6	spin	52.738	84.8736	23.576	0	763.488	252.286
6	group stage	England	Zimbabwe	50_runs	Kapstadt	1	11	7	spin	53.615	86.285	23.968	0	751	239.797
6	group stage	England	Zimbabwe	50_runs	Kapstadt	1	12	2	pace	71.514	115.091	31.9696	0	563.035	51.8322
6	group stage	England	Zimbabwe	50_runs	Kapstadt	1	12	3	pace	53.767	86.5296	24.036	0	748.877	237.674
6	group stage	England	Zimbabwe	50_runs	Kapstadt	1	12	5	pace	72.223	116.232	32.2866	0	557.507	46.305
6	group stage	England	Zimbabwe	50_runs	Kapstadt	1	12	6	pace	55.115	88.699	24.6386	0	730.561	219.358
6	group stage	England	Zimbabwe	50_runs	Kapstadt	1	13	1	spin	56.073	90.2407	25.0669	0	718.079	206.877
6	group stage	England	Zimbabwe	50_runs	Kapstadt	1	13	2	spin	53.777	86.5457	24.0405	0	748.737	237.535
6	group stage	England	Zimbabwe	50_runs	Kapstadt	1	13	3	spin	53.277	85.741	23.817	0	755.764	244.562
6	group stage	England	Zimbabwe	50_runs	Kapstadt	1	13	4	spin	54.84	88.2564	24.5157	0	734.224	223.022
6	group stage	England	Zimbabwe	50_runs	Kapstadt	1	13	5	spin	53.288	85.7587	23.8219	0	755.608	244.406
6	group stage	England	Zimbabwe	50_runs	Kapstadt	1	13	6	spin	55.697	89.6356	24.8988	0	722.927	211.724
6	group stage	England	Zimbabwe	50_runs	Kapstadt	1	14	1	pace	74.872	120.495	33.4708	0	537.783	26.5802
6	group stage	England	Zimbabwe	50_runs	Kapstadt	1	14	2	pace	72.655	116.927	32.4797	0	554.192	42.9901
6	group stage	England	Zimbabwe	50_runs	Kapstadt	1	14	4	pace	57.659	92.7932	25.7759	0	698.327	187.125
6	group stage	England	Zimbabwe	50_runs	Kapstadt	1	14	5	pace	56.971	91.6859	25.4683	0	706.761	195.558
6	group stage	England	Zimbabwe	50_runs	Kapstadt	1	14	6	pace	72.603	116.843	32.4564	0	554.589	43.387
6	group stage	England	Zimbabwe	50_runs	Kapstadt	1	15	1	spin	54.185	87.2023	24.2229	0	743.1	231.897
6	group stage	England	Zimbabwe	50_runs	Kapstadt	1	15	2	spin	50.107	80.6394	22.3998	0	803.577	292.375
6	group stage	England	Zimbabwe	50_runs	Kapstadt	1	15	3	spin	52.9	85.1343	23.6484	0	761.15	249.948
6	group stage	England	Zimbabwe	50_runs	Kapstadt	1	15	4	spin	48.092	77.3966	21.499	0	837.246	326.044
6	group stage	England	Zimbabwe	50_runs	Kapstadt	1	15	5	spin	48.746	78.4491	21.7914	0	826.013	314.811
6	group stage	England	Zimbabwe	50_runs	Kapstadt	1	15	6	spin	52.762	84.9122	23.5867	0	763.141	251.939
6	group stage	England	Zimbabwe	50_runs	Kapstadt	1	16	1	pace	75.628	121.711	33.8087	0	532.407	21.2043
6	group stage	England	Zimbabwe	50_runs	Kapstadt	1	16	3	pace	53.046	85.3693	23.7137	0	759.055	247.853
6	group stage	England	Zimbabwe	50_runs	Kapstadt	1	16	4	pace	71.935	115.768	32.1578	0	559.739	48.537
6	group stage	England	Zimbabwe	50_runs	Kapstadt	1	16	6	pace	72.031	115.923	32.2007	0	558.993	47.791
6	group stage	England	Zimbabwe	50_runs	Kapstadt	1	16	7	pace	55.576	89.4409	24.8447	0	724.501	213.298
6	group stage	England	Zimbabwe	50_runs	Kapstadt	1	17	1	spin	50.02	80.4994	22.3609	0	804.975	293.773
6	group stage	England	Zimbabwe	50_runs	Kapstadt	1	17	2	spin	54.936	88.4109	24.5586	0	732.941	221.739
6	group stage	England	Zimbabwe	50_runs	Kapstadt	1	17	3	spin	44.56	71.7124	19.9201	0	903.61	392.407
6	group stage	England	Zimbabwe	50_runs	Kapstadt	1	17	4	spin	54.641	87.9362	24.4267	0	736.898	225.696
6	group stage	England	Zimbabwe	50_runs	Kapstadt	1	17	5	spin	53.323	85.8151	23.8375	0	755.112	243.91
6	group stage	England	Zimbabwe	50_runs	Kapstadt	1	17	6	spin	41.253	66.3903	18.4417	0	976.047	464.844
6	group stage	England	Zimbabwe	50_runs	Kapstadt	1	18	1	pace	75.65	121.747	33.8186	0	532.252	21.0495
6	group stage	England	Zimbabwe	50_runs	Kapstadt	1	18	2	pace	74.768	120.327	33.4243	0	538.531	27.3282
6	group stage	England	Zimbabwe	50_runs	Kapstadt	1	18	3	pace	76.313	122.814	34.115	0	527.628	16.4254
6	group stage	England	Zimbabwe	50_runs	Kapstadt	1	18	4	pace	58.122	93.5383	25.9829	0	692.764	181.562
6	group stage	England	Zimbabwe	50_runs	Kapstadt	1	18	5	pace	75.603	121.671	33.7976	0	532.583	21.3804
6	group stage	England	Zimbabwe	50_runs	Kapstadt	1	18	6	pace	60.587	97.5053	27.0848	0	664.579	153.377
6	group stage	England	Zimbabwe	50_runs	Kapstadt	1	19	1	pace	74.662	120.157	33.3769	0	539.295	28.0928
6	group stage	England	Zimbabwe	50_runs	Kapstadt	1	19	2	pace	76.104	122.478	34.0215	0	529.077	17.8743
6	group stage	England	Zimbabwe	50_runs	Kapstadt	2	1	1	pace	80.662	129.813	36.0591	0	499.18	12.0224
6	group stage	England	Zimbabwe	50_runs	Kapstadt	2	1	2	pace	84.433	135.882	37.7449	0	476.885	34.3171
6	group stage	England	Zimbabwe	50_runs	Kapstadt	2	1	3	pace	86.52	139.24	38.6779	0	465.382	45.8203
6	group stage	England	Zimbabwe	50_runs	Kapstadt	2	1	4	pace	85.683	137.893	38.3037	0	469.928	41.2742
6	group stage	England	Zimbabwe	50_runs	Kapstadt	2	1	5	pace	88.154	141.87	39.4084	0	456.756	54.4465
6	group stage	England	Zimbabwe	50_runs	Kapstadt	2	1	6	pace	87.462	140.756	39.099	0	460.37	50.8327
6	group stage	England	Zimbabwe	50_runs	Kapstadt	2	2	1	pace	84.94	136.698	37.9716	0	474.039	37.1636
6	group stage	England	Zimbabwe	50_runs	Kapstadt	2	2	2	pace	86.309	138.901	38.5836	0	466.52	44.6826
6	group stage	England	Zimbabwe	50_runs	Kapstadt	2	2	3	pace	87.955	141.55	39.3194	0	457.789	53.4131
6	group stage	England	Zimbabwe	50_runs	Kapstadt	2	2	4	pace	87.405	140.665	39.0735	0	460.67	50.5324
6	group stage	England	Zimbabwe	50_runs	Kapstadt	2	2	5	pace	89.356	143.805	39.9457	0	450.612	60.5907
6	group stage	England	Zimbabwe	50_runs	Kapstadt	2	2	6	pace	87.817	141.328	39.2577	0	458.509	52.6937
6	group stage	England	Zimbabwe	50_runs	Kapstadt	2	3	1	pace	85.112	136.974	38.0485	0	473.081	38.1215
6	group stage	England	Zimbabwe	50_runs	Kapstadt	2	3	2	pace	84.934	136.688	37.9689	0	474.072	37.1301
6	group stage	England	Zimbabwe	50_runs	Kapstadt	2	3	3	pace	86.135	138.621	38.5058	0	467.462	43.7402
6	group stage	England	Zimbabwe	50_runs	Kapstadt	2	3	4	pace	83.426	134.261	37.2948	0	482.642	28.5608
6	group stage	England	Zimbabwe	50_runs	Kapstadt	2	3	5	pace	84.644	136.221	37.8393	0	475.696	35.5059
6	group stage	England	Zimbabwe	50_runs	Kapstadt	2	3	6	pace	86.498	139.205	38.6681	0	465.5	45.702
6	group stage	England	Zimbabwe	50_runs	Kapstadt	2	4	1	pace	82.55	132.851	36.9032	0	487.763	23.4391
6	group stage	England	Zimbabwe	50_runs	Kapstadt	2	4	2	pace	83.863	134.964	37.4901	0	480.127	31.0758
6	group stage	England	Zimbabwe	50_runs	Kapstadt	2	4	3	pace	84.987	136.773	37.9926	0	473.777	37.4257
6	group stage	England	Zimbabwe	50_runs	Kapstadt	2	4	4	pace	86.12	138.597	38.4991	0	467.544	43.6588
6	group stage	England	Zimbabwe	50_runs	Kapstadt	2	4	5	pace	86.427	139.091	38.6363	0	465.883	45.3195
6	group stage	England	Zimbabwe	50_runs	Kapstadt	2	4	6	pace	88.541	142.493	39.5814	0	454.759	56.4429
6	group stage	England	Zimbabwe	50_runs	Kapstadt	2	5	1	pace	83.999	135.183	37.5509	0	479.349	31.8532
6	group stage	England	Zimbabwe	50_runs	Kapstadt	2	5	2	pace	87.206	140.344	38.9846	0	461.721	49.4812
6	group stage	England	Zimbabwe	50_runs	Kapstadt	2	5	3	pace	86.215	138.75	38.5416	0	467.028	44.174
6	group stage	England	Zimbabwe	50_runs	Kapstadt	2	5	4	pace	83.791	134.849	37.4579	0	480.539	30.6632
6	group stage	England	Zimbabwe	50_runs	Kapstadt	2	5	5	pace	84.977	136.757	37.9881	0	473.832	37.37
6	group stage	England	Zimbabwe	50_runs	Kapstadt	2	5	6	pace	86.013	138.425	38.4513	0	468.125	43.0771
6	group stage	England	Zimbabwe	50_runs	Kapstadt	2	6	1	pace	87.64	141.043	39.1786	0	459.435	51.7677
6	group stage	England	Zimbabwe	50_runs	Kapstadt	2	6	2	pace	86.62	139.401	38.7226	0	464.845	46.3576
6	group stage	England	Zimbabwe	50_runs	Kapstadt	2	6	3	pace	87.219	140.365	38.9904	0	461.652	49.55
6	group stage	England	Zimbabwe	50_runs	Kapstadt	2	6	4	pace	88.347	142.181	39.4946	0	455.758	55.4443
6	group stage	England	Zimbabwe	50_runs	Kapstadt	2	6	5	pace	87.444	140.727	39.091	0	460.464	50.7379
6	group stage	England	Zimbabwe	50_runs	Kapstadt	2	6	6	pace	86.984	139.987	38.8853	0	462.9	48.3028
6	group stage	England	Zimbabwe	50_runs	Kapstadt	2	7	1	pace	68.039	109.498	30.4162	0	591.791	80.5884
6	group stage	England	Zimbabwe	50_runs	Kapstadt	2	7	2	pace	69.065	111.149	30.8748	0	582.999	71.797
6	group stage	England	Zimbabwe	50_runs	Kapstadt	2	7	3	pace	70.223	113.013	31.3925	0	573.386	62.1832
6	group stage	England	Zimbabwe	50_runs	Kapstadt	2	7	4	pace	70.552	113.542	31.5396	0	570.712	59.5094
6	group stage	England	Zimbabwe	50_runs	Kapstadt	2	7	5	pace	66.726	107.385	29.8292	0	603.436	92.2334
6	group stage	England	Zimbabwe	50_runs	Kapstadt	2	7	6	pace	70.82	113.974	31.6594	0	568.552	57.3497
6	group stage	England	Zimbabwe	50_runs	Kapstadt	2	8	1	spin	49.104	79.0252	21.9515	0	819.991	308.789
6	group stage	England	Zimbabwe	50_runs	Kapstadt	2	8	2	spin	50.108	80.641	22.4003	0	803.561	292.359
6	group stage	England	Zimbabwe	50_runs	Kapstadt	2	8	3	spin	49.176	79.1411	21.9836	0	818.791	307.588
6	group stage	England	Zimbabwe	50_runs	Kapstadt	2	8	4	spin	50.561	81.37	22.6028	0	796.362	285.16
6	group stage	England	Zimbabwe	50_runs	Kapstadt	2	8	5	spin	50.055	80.5557	22.3766	0	804.412	293.21
6	group stage	England	Zimbabwe	50_runs	Kapstadt	2	8	6	spin	50.403	81.1158	22.5322	0	798.858	287.656
6	group stage	England	Zimbabwe	50_runs	Kapstadt	2	9	1	pace	70.892	114.09	31.6916	0	567.975	56.7722
6	group stage	England	Zimbabwe	50_runs	Kapstadt	2	9	2	pace	71.878	115.676	32.1323	0	560.183	48.9809
6	group stage	England	Zimbabwe	50_runs	Kapstadt	2	9	3	pace	58.57	94.2593	26.1831	0	687.465	176.263
6	group stage	England	Zimbabwe	50_runs	Kapstadt	2	9	4	pace	70.539	113.522	31.5338	0	570.817	59.6145
6	group stage	England	Zimbabwe	50_runs	Kapstadt	2	9	5	pace	71.757	115.482	32.0782	0	561.128	49.9255
6	group stage	England	Zimbabwe	50_runs	Kapstadt	2	9	6	pace	71.12	114.457	31.7935	0	566.154	54.9514
6	group stage	England	Zimbabwe	50_runs	Kapstadt	2	10	1	spin	50.58	81.4006	22.6113	0	796.063	284.86
6	group stage	England	Zimbabwe	50_runs	Kapstadt	2	10	2	spin	48.767	78.4829	21.8008	0	825.658	314.455
6	group stage	England	Zimbabwe	50_runs	Kapstadt	2	10	3	spin	57.186	92.0319	25.5644	0	704.103	192.901
6	group stage	England	Zimbabwe	50_runs	Kapstadt	2	10	4	spin	49.959	80.4012	22.3337	0	805.958	294.756
6	group stage	England	Zimbabwe	50_runs	Kapstadt	2	10	5	spin	51.503	82.886	23.0239	0	781.796	270.594
6	group stage	England	Zimbabwe	50_runs	Kapstadt	2	10	6	spin	50.994	82.0669	22.7964	0	789.6	278.397
6	group stage	England	Zimbabwe	50_runs	Kapstadt	2	11	1	pace	71.367	114.854	31.9039	0	564.194	52.9919
6	group stage	England	Zimbabwe	50_runs	Kapstadt	2	11	2	pace	70.404	113.304	31.4734	0	571.911	60.7091
6	group stage	England	Zimbabwe	50_runs	Kapstadt	2	11	3	pace	72.625	116.879	32.4663	0	554.421	43.219
6	group stage	England	Zimbabwe	50_runs	Kapstadt	2	11	4	pace	70.572	113.575	31.5485	0	570.55	59.3476
6	group stage	England	Zimbabwe	50_runs	Kapstadt	2	11	5	pace	68.606	110.411	30.6696	0	586.9	75.6975
6	group stage	England	Zimbabwe	50_runs	Kapstadt	2	11	6	pace	71.614	115.252	32.0143	0	562.248	51.046
6	group stage	England	Zimbabwe	50_runs	Kapstadt	2	12	1	spin	48.956	78.787	21.8853	0	822.47	311.268
6	group stage	England	Zimbabwe	50_runs	Kapstadt	2	12	2	spin	49.31	79.3568	22.0435	0	816.566	305.363
6	group stage	England	Zimbabwe	50_runs	Kapstadt	2	12	3	spin	50.473	81.2284	22.5634	0	797.75	286.548
6	group stage	England	Zimbabwe	50_runs	Kapstadt	2	12	4	spin	57.711	92.8769	25.7991	0	697.698	186.496
6	group stage	England	Zimbabwe	50_runs	Kapstadt	2	12	5	spin	51.28	82.5272	22.9242	0	785.196	273.994
6	group stage	England	Zimbabwe	50_runs	Kapstadt	2	12	6	spin	50.291	80.9355	22.4821	0	800.637	289.435
6	group stage	England	Zimbabwe	50_runs	Kapstadt	2	13	1	pace	57.215	92.0786	25.5774	0	703.746	192.544
6	group stage	England	Zimbabwe	50_runs	Kapstadt	2	13	2	pace	73.273	117.921	32.756	0	549.518	38.3159
6	group stage	England	Zimbabwe	50_runs	Kapstadt	2	13	3	pace	72.03	115.921	32.2003	0	559.001	47.7988
6	group stage	England	Zimbabwe	50_runs	Kapstadt	2	13	4	pace	70.019	112.685	31.3013	0	575.056	63.8538
6	group stage	England	Zimbabwe	50_runs	Kapstadt	2	13	5	pace	73.901	118.932	33.0367	0	544.849	33.6462
6	group stage	England	Zimbabwe	50_runs	Kapstadt	2	13	6	pace	72.73	117.048	32.5132	0	553.621	42.4186
6	group stage	England	Zimbabwe	50_runs	Kapstadt	2	14	1	spin	48.196	77.5639	21.5455	0	835.44	324.237
6	group stage	England	Zimbabwe	50_runs	Kapstadt	2	14	2	spin	50.019	80.4978	22.3605	0	804.991	293.789
6	group stage	England	Zimbabwe	50_runs	Kapstadt	2	14	3	spin	53.567	86.2077	23.9466	0	751.673	240.47
6	group stage	England	Zimbabwe	50_runs	Kapstadt	2	14	4	spin	49.561	79.7607	22.1557	0	812.43	301.228
6	group stage	England	Zimbabwe	50_runs	Kapstadt	2	14	5	spin	57.898	93.1778	25.8827	0	695.445	184.242
6	group stage	England	Zimbabwe	50_runs	Kapstadt	2	14	6	spin	49.224	79.2183	22.0051	0	817.992	306.79
6	group stage	England	Zimbabwe	50_runs	Kapstadt	2	15	1	pace	82.605	132.94	36.9277	0	487.438	23.7639
6	group stage	England	Zimbabwe	50_runs	Kapstadt	2	15	2	pace	85.615	137.784	38.2733	0	470.301	40.901
6	group stage	England	Zimbabwe	50_runs	Kapstadt	2	15	3	pace	84.745	136.384	37.8844	0	475.13	36.0728
6	group stage	England	Zimbabwe	50_runs	Kapstadt	2	15	4	pace	84.82	136.505	37.9179	0	474.709	36.4929
6	group stage	England	Zimbabwe	50_runs	Kapstadt	2	15	5	pace	83.639	134.604	37.39	0	481.412	29.7899
6	group stage	England	Zimbabwe	50_runs	Kapstadt	2	15	6	pace	84.255	135.595	37.6654	0	477.893	33.3096
6	group stage	England	Zimbabwe	50_runs	Kapstadt	2	16	1	pace	62.91	101.244	28.1233	0	640.039	128.837
6	group stage	England	Zimbabwe	50_runs	Kapstadt	2	16	2	pace	75.801	121.99	33.8861	0	531.192	19.9892
6	group stage	England	Zimbabwe	50_runs	Kapstadt	2	16	3	pace	60.216	96.9083	26.919	0	668.674	157.471
6	group stage	England	Zimbabwe	50_runs	Kapstadt	2	16	4	pace	61.858	99.5508	27.653	0	650.924	139.722
6	group stage	England	Zimbabwe	50_runs	Kapstadt	2	16	5	pace	62.867	101.175	28.1041	0	640.477	129.274
6	group stage	England	Zimbabwe	50_runs	Kapstadt	2	16	6	pace	76.985	123.895	34.4154	0	523.022	11.8197
6	group stage	England	Zimbabwe	50_runs	Kapstadt	2	17	1	pace	87.473	140.774	39.1039	0	460.312	50.8906
6	group stage	England	Zimbabwe	50_runs	Kapstadt	2	17	2	pace	83.572	134.496	37.36	0	481.798	29.404
6	group stage	England	Zimbabwe	50_runs	Kapstadt	2	17	3	pace	83.737	134.762	37.4338	0	480.849	30.3533
6	group stage	England	Zimbabwe	50_runs	Kapstadt	2	17	4	pace	74.51	119.912	33.309	0	540.395	29.1929
6	group stage	England	Zimbabwe	50_runs	Kapstadt	2	17	5	pace	83.916	135.05	37.5138	0	479.823	31.379
6	group stage	England	Zimbabwe	50_runs	Kapstadt	2	17	6	pace	85.436	137.496	38.1933	0	471.287	39.9156
6	group stage	England	Zimbabwe	50_runs	Kapstadt	2	18	1	pace	61.388	98.7944	27.4429	0	655.908	144.705
6	group stage	England	Zimbabwe	50_runs	Kapstadt	2	18	2	pace	62.561	100.682	27.9673	0	643.609	132.407
6	group stage	England	Zimbabwe	50_runs	Kapstadt	2	18	3	pace	63.257	101.802	28.2784	0	636.528	125.326
6	group stage	England	Zimbabwe	50_runs	Kapstadt	2	18	4	pace	60.984	98.1442	27.2623	0	660.253	149.05
6	group stage	England	Zimbabwe	50_runs	Kapstadt	2	18	5	pace	58.48	94.1144	26.1429	0	688.523	177.321
8	group stage	SriLanka	Kenya	172_runs	Johannesburg	1	1	1	pace	74.396	119.729	33.258	0	541.223	30.021
8	group stage	SriLanka	Kenya	172_runs	Johannesburg	1	1	3	pace	75.916	122.175	33.9375	0	530.387	19.1846
8	group stage	SriLanka	Kenya	172_runs	Johannesburg	1	1	4	pace	76.145	122.543	34.0399	0	528.792	17.5895
8	group stage	SriLanka	Kenya	172_runs	Johannesburg	1	1	5	pace	78.581	126.464	35.1289	0	512.399	1.197
8	group stage	SriLanka	Kenya	172_runs	Johannesburg	1	1	6	pace	75.864	122.091	33.9142	0	530.75	19.5481
8	group stage	SriLanka	Kenya	172_runs	Johannesburg	1	2	1	pace	76.926	123.8	34.389	0	523.423	12.2209
8	group stage	SriLanka	Kenya	172_runs	Johannesburg	1	2	2	pace	75.57	121.618	33.7828	0	532.815	21.613
8	group stage	SriLanka	Kenya	172_runs	Johannesburg	1	2	3	pace	73.757	118.7	32.9723	0	545.912	34.7099
8	group stage	SriLanka	Kenya	172_runs	Johannesburg	1	2	4	pace	75.692	121.814	33.8374	0	531.957	20.7542
8	group stage	SriLanka	Kenya	172_runs	Johannesburg	1	2	5	pace	78.297	126.007	35.0019	0	514.258	3.05558
8	group stage	SriLanka	Kenya	172_runs	Johannesburg	1	2	6	pace	78.652	126.578	35.1606	0	511.937	0.734449
8	group stage	SriLanka	Kenya	172_runs	Johannesburg	1	3	1	pace	75.463	121.446	33.735	0	533.571	22.3684
8	group stage	SriLanka	Kenya	172_runs	Johannesburg	1	3	2	pace	77.452	124.647	34.6241	0	519.868	8.66612
8	group stage	SriLanka	Kenya	172_runs	Johannesburg	1	3	3	pace	77.824	125.246	34.7904	0	517.383	6.18114
8	group stage	SriLanka	Kenya	172_runs	Johannesburg	1	3	4	pace	79.251	127.542	35.4284	0	508.067	3.1349
8	group stage	SriLanka	Kenya	172_runs	Johannesburg	1	3	5	pace	77.514	124.747	34.6519	0	519.453	8.25031
8	group stage	SriLanka	Kenya	172_runs	Johannesburg	1	3	6	pace	79.456	127.872	35.52	0	506.757	4.44574
8	group stage	SriLanka	Kenya	172_runs	Johannesburg	1	4	1	pace	77.756	125.136	34.76	0	517.836	6.63361
8	group stage	SriLanka	Kenya	172_runs	Johannesburg	1	4	2	pace	77.733	125.099	34.7498	0	517.989	6.78683
8	group stage	SriLanka	Kenya	172_runs	Johannesburg	1	4	3	pace	77.744	125.117	34.7547	0	517.916	6.71354
8	group stage	SriLanka	Kenya	172_runs	Johannesburg	1	4	4	pace	80.439	129.454	35.9595	0	500.564	10.6385
8	group stage	SriLanka	Kenya	172_runs	Johannesburg	1	4	5	pace	76.834	123.652	34.3479	0	524.05	12.8476
8	group stage	SriLanka	Kenya	172_runs	Johannesburg	1	4	6	pace	79.341	127.687	35.4686	0	507.491	3.71123
8	group stage	SriLanka	Kenya	172_runs	Johannesburg	1	4	7	pace	79.677	128.228	35.6188	0	505.351	5.85133
8	group stage	SriLanka	Kenya	172_runs	Johannesburg	1	5	1	pace	78.008	125.542	34.8727	0	516.163	4.96078
8	group stage	SriLanka	Kenya	172_runs	Johannesburg	1	5	3	pace	76.177	122.595	34.0542	0	528.57	17.3673
8	group stage	SriLanka	Kenya	172_runs	Johannesburg	1	5	4	pace	78.694	126.646	35.1794	0	511.664	0.461222
8	group stage	SriLanka	Kenya	172_runs	Johannesburg	1	5	5	pace	77.586	124.863	34.684	0	518.971	7.76825
8	group stage	SriLanka	Kenya	172_runs	Johannesburg	1	5	6	pace	78.218	125.88	34.9666	0	514.777	3.57498
8	group stage	SriLanka	Kenya	172_runs	Johannesburg	1	6	1	pace	78.537	126.393	35.1092	0	512.686	1.48407
8	group stage	SriLanka	Kenya	172_runs	Johannesburg	1	6	2	pace	79.713	128.286	35.6349	0	505.123	6.07956
8	group stage	SriLanka	Kenya	172_runs	Johannesburg	1	6	4	pace	78.118	125.719	34.9219	0	515.436	4.23395
8	group stage	SriLanka	Kenya	172_runs	Johannesburg	1	6	5	pace	79.297	127.616	35.4489	0	507.773	3.42963
8	group stage	SriLanka	Kenya	172_runs	Johannesburg	1	6	6	pace	78.469	126.284	35.0788	0	513.131	1.92835
8	group stage	SriLanka	Kenya	172_runs	Johannesburg	1	7	2	pace	77.556	124.814	34.6706	0	519.171	7.969
8	group stage	SriLanka	Kenya	172_runs	Johannesburg	1	7	3	pace	82.751	133.175	36.993	0	486.578	24.6239
8	group stage	SriLanka	Kenya	172_runs	Johannesburg	1	7	4	pace	79.287	127.6	35.4445	0	507.837	3.36559
8	group stage	SriLanka	Kenya	172_runs	Johannesburg	1	7	5	pace	80.349	129.309	35.9192	0	501.125	10.0778
8	group stage	SriLanka	Kenya	172_runs	Johannesburg	1	7	6	pace	83.684	134.676	37.4101	0	481.154	30.0488
8	group stage	SriLanka	Kenya	172_runs	Johannesburg	1	8	1	pace	71.414	114.93	31.9249	0	563.823	52.6206
8	group stage	SriLanka	Kenya	172_runs	Johannesburg	1	8	2	pace	73.062	117.582	32.6616	0	551.105	39.9029
8	group stage	SriLanka	Kenya	172_runs	Johannesburg	1	8	3	pace	74.869	120.49	33.4694	0	537.804	26.6017
8	group stage	SriLanka	Kenya	172_runs	Johannesburg	1	8	4	pace	73.604	118.454	32.9039	0	547.047	35.8447
8	group stage	SriLanka	Kenya	172_runs	Johannesburg	1	8	5	pace	75.064	120.804	33.5566	0	536.407	25.2046
8	group stage	SriLanka	Kenya	172_runs	Johannesburg	1	8	6	pace	74.988	120.681	33.5226	0	536.951	25.7483
8	group stage	SriLanka	Kenya	172_runs	Johannesburg	1	9	1	pace	79.839	128.488	35.6912	0	504.326	6.87673
8	group stage	SriLanka	Kenya	172_runs	Johannesburg	1	9	2	pace	83.091	133.722	37.145	0	484.587	26.6149
8	group stage	SriLanka	Kenya	172_runs	Johannesburg	1	9	4	pace	60.533	97.4184	27.0607	0	665.172	153.97
8	group stage	SriLanka	Kenya	172_runs	Johannesburg	1	9	5	pace	81.419	131.031	36.3975	0	494.539	16.6636
8	group stage	SriLanka	Kenya	172_runs	Johannesburg	1	9	6	pace	77.104	124.087	34.4686	0	522.215	11.0125
8	group stage	SriLanka	Kenya	172_runs	Johannesburg	1	9	7	pace	79.128	127.344	35.3734	0	508.857	2.34514
8	group stage	SriLanka	Kenya	172_runs	Johannesburg	1	10	1	spin	58.615	94.3317	26.2032	0	686.938	175.735
8	group stage	SriLanka	Kenya	172_runs	Johannesburg	1	10	2	spin	59.71	96.0939	26.6928	0	674.34	163.138
8	group stage	SriLanka	Kenya	172_runs	Johannesburg	1	10	3	spin	58.907	94.8016	26.3338	0	683.533	172.33
8	group stage	SriLanka	Kenya	172_runs	Johannesburg	1	10	4	spin	56.714	91.2723	25.3534	0	709.963	198.761
8	group stage	SriLanka	Kenya	172_runs	Johannesburg	1	10	5	spin	55.282	88.9678	24.7133	0	728.354	217.151
8	group stage	SriLanka	Kenya	172_runs	Johannesburg	1	10	6	spin	61.944	99.6892	27.6914	0	650.02	138.818
8	group stage	SriLanka	Kenya	172_runs	Johannesburg	1	11	1	pace	73.956	119.021	33.0613	0	544.443	33.241
8	group stage	SriLanka	Kenya	172_runs	Johannesburg	1	11	2	pace	61.728	99.3416	27.5949	0	652.295	141.092
8	group stage	SriLanka	Kenya	172_runs	Johannesburg	1	11	3	pace	75.604	121.673	33.798	0	532.576	21.3733
8	group stage	SriLanka	Kenya	172_runs	Johannesburg	1	11	4	pace	73.976	119.053	33.0702	0	544.296	33.0938
8	group stage	SriLanka	Kenya	172_runs	Johannesburg	1	11	5	pace	75.403	121.349	33.7082	0	533.995	22.793
8	group stage	SriLanka	Kenya	172_runs	Johannesburg	1	11	6	pace	72.988	117.463	32.6286	0	551.664	40.4617
8	group stage	SriLanka	Kenya	172_runs	Johannesburg	1	12	1	spin	62.041	99.8453	27.7348	0	649.004	137.802
8	group stage	SriLanka	Kenya	172_runs	Johannesburg	1	12	2	spin	60.658	97.6196	27.1166	0	663.801	152.599
8	group stage	SriLanka	Kenya	172_runs	Johannesburg	1	12	3	spin	65.526	105.454	29.2927	0	614.487	103.284
8	group stage	SriLanka	Kenya	172_runs	Johannesburg	1	12	4	spin	58.217	93.6912	26.0253	0	691.634	180.432
8	group stage	SriLanka	Kenya	172_runs	Johannesburg	1	12	5	spin	60.603	97.5311	27.092	0	664.404	153.201
8	group stage	SriLanka	Kenya	172_runs	Johannesburg	1	12	6	spin	57.483	92.5099	25.6972	0	700.465	189.263
8	group stage	SriLanka	Kenya	172_runs	Johannesburg	1	13	1	spin	57.753	92.9444	25.8179	0	697.191	185.988
8	group stage	SriLanka	Kenya	172_runs	Johannesburg	1	13	2	spin	58.995	94.9432	26.3731	0	682.513	171.311
8	group stage	SriLanka	Kenya	172_runs	Johannesburg	1	13	3	spin	61.171	98.4452	27.3459	0	658.234	147.032
8	group stage	SriLanka	Kenya	172_runs	Johannesburg	1	13	4	spin	54.254	87.3133	24.2537	0	742.155	230.952
8	group stage	SriLanka	Kenya	172_runs	Johannesburg	1	13	5	spin	60.343	97.1126	26.9757	0	667.266	156.064
8	group stage	SriLanka	Kenya	172_runs	Johannesburg	1	13	7	spin	50.395	81.1029	22.5286	0	798.985	287.783
8	group stage	SriLanka	Kenya	172_runs	Johannesburg	1	14	1	spin	63.434	102.087	28.3575	0	634.752	123.55
8	group stage	SriLanka	Kenya	172_runs	Johannesburg	1	14	2	spin	59.603	95.9217	26.6449	0	675.551	164.348
8	group stage	SriLanka	Kenya	172_runs	Johannesburg	1	14	3	spin	60.668	97.6357	27.121	0	663.692	152.489
8	group stage	SriLanka	Kenya	172_runs	Johannesburg	1	14	4	spin	62.579	100.711	27.9753	0	643.424	132.222
8	group stage	SriLanka	Kenya	172_runs	Johannesburg	1	14	5	spin	61.54	99.039	27.5108	0	654.288	143.085
8	group stage	SriLanka	Kenya	172_runs	Johannesburg	1	14	6	spin	56.148	90.3614	25.1004	0	717.12	205.918
8	group stage	SriLanka	Kenya	172_runs	Johannesburg	1	14	7	spin	61.332	98.7043	27.4179	0	656.506	145.304
8	group stage	SriLanka	Kenya	172_runs	Johannesburg	1	15	1	pace	75.874	122.107	33.9187	0	530.681	19.4782
8	group stage	SriLanka	Kenya	172_runs	Johannesburg	1	15	2	pace	69.735	112.228	31.1743	0	577.398	66.1957
8	group stage	SriLanka	Kenya	172_runs	Johannesburg	1	15	3	pace	78.436	126.231	35.064	0	513.347	2.14424
8	group stage	SriLanka	Kenya	172_runs	Johannesburg	1	15	4	pace	80.758	129.967	36.1021	0	498.587	12.6158
8	group stage	SriLanka	Kenya	172_runs	Johannesburg	1	15	5	pace	81.553	131.247	36.4575	0	493.726	17.4761
8	group stage	SriLanka	Kenya	172_runs	Johannesburg	1	15	6	pace	82.053	132.052	36.681	0	490.718	20.4847
[truncated: 4,385 more rows]

## Sheet: Baseball__PitchSpeed
Loffing, F.: Left-handedness and time pressure in elite interactive ball games @ Biology Letters
[truncated: 22 more rows]

[truncated: 1 more sheets: Data used in Matlab]
